# Supplementary material for: Metabolomics analysis of time-series human small intestine lumen samples collected in vivo
Source: Royal Society of Chemistry journal article supplement (doi:10.1039/d1fo01574e), 2021-01-01
Supplement: d1fo01574e2.xlsx [file d1fo01574e2.xlsx]

## Sheet: SuppTable1
Sample Number	Sampling Time	Sample pH	Sampling Depth (cm past pylorus)	Oil layer formed on top of sample	Food and Drink
1	10:15:00	1	0	No	water, apple juice, espresso at 9:35
2	10:27:00	1.6	0	No
3	10:40:00	8.1	10	No
4	10:50:00	6.6	30	No	60 grams of puree (pear, peach, pumpkin, apple, cinnamon) at 10:45
5	11:10:00	5	70	No	500 mg acetaminophen and 30 grams puree as above at 10:55
6	11:30:00	6.1	85	No
7	12:00:00	6.4	125	No
8	12:30:00	6.3	125	Yes	20 grams olive oil, 20 grams white bread, espresso at 12:10
9	13:00:00	6.7	125	Yes
10	13:30:00	6.4	125	No
11	14:00:00	6.3	125	No
12	14:30:00	6.8	125	No	25 grams whole wheat cereal with water, espresso at 14:15
13	15:00:00	6.8	125	No
14	15:30:00	6.2	125	Yes
15	16:00:00	6.4	125	Yes
16	16:30:00	6.3	125	No
17	17:00:00	6.6	125	No	210 grams fermented milk (kefir) at 16:35
18	17:30:00	6.4	125	No
19	18:00:00	6.8	125	No
20	18:30:00	6.7	125	No

## Sheet: SuppTable2
MS-DIAL ver. 4.24			MS-DIAL ver. 4.24			MS-DIAL ver. 4.24			MS-DIAL ver. 4.24
HILIC ESI positive mode			HILIC ESI negative mode			RP (CSH) ESI positive mode			RP (CSH) ESI negative mode
MS1 Data type	Centroid		MS1 Data type	Centroid		MS1 Data type	Centroid		MS1 Data type	Centroid
MS2 Data type	Centroid		MS2 Data type	Centroid		MS2 Data type	Centroid		MS2 Data type	Centroid
Ion mode	Positive		Ion mode	Negative		Ion mode	Positive		Ion mode	Negative
Target	Metablomics		Target	Metablomics		Target	Lipidomics		Target	Lipidomics
Mode	ddMSMS		Mode	ddMSMS		Mode	ddMSMS		Mode	ddMSMS
#Data collection parameters			#Data collection parameters			#Data collection parameters			#Data collection parameters
Retention time begin	0.5		Retention time begin	0.8		Retention time begin	0.3		Retention time begin	0.3
Retention time end	11		Retention time end	11		Retention time end	12.5		Retention time end	12.5
Mass range begin	0		Mass range begin	0		Mass range begin	0		Mass range begin	0
Mass range end	2000		Mass range end	2000		Mass range end	2000		Mass range end	2000
MS2 mass range begin	0		MS2 mass range begin	0		MS2 mass range begin	0		MS2 mass range begin	0
MS2 mass range end	2000		MS2 mass range end	2000		MS2 mass range end	2000		MS2 mass range end	2000
#Centroid parameters			#Centroid parameters			#Centroid parameters			#Centroid parameters
MS1 tolerance	0.005		MS1 tolerance	0.005		MS1 tolerance	0.005		MS1 tolerance	0.005
MS2 tolerance	0.01		MS2 tolerance	0.01		MS2 tolerance	0.01		MS2 tolerance	0.01
#Isotope recognition			#Isotope recognition			#Isotope recognition			#Isotope recognition
Maximum charged number	2		Maximum charged number	2		Maximum charged number	2		Maximum charged number	2
#Data processing			#Data processing			#Data processing			#Data processing
Number of threads	5		Number of threads	5		Number of threads	4		Number of threads	5
#Peak detection parameters			#Peak detection parameters			#Peak detection parameters			#Peak detection parameters
Smoothing method	LinearWeightedMovingAverage		Smoothing method	LinearWeightedMovingAverage		Smoothing method	LinearWeightedMovingAverage		Smoothing method	LinearWeightedMovingAverage
Smoothing level	3		Smoothing level	3		Smoothing level	3		Smoothing level	3
Minimum peak width	8		Minimum peak width	8		Minimum peak width	8		Minimum peak width	8
Minimum peak height	100000		Minimum peak height	100000		Minimum peak height	10000		Minimum peak height	100000
#Peak spotting parameters			#Peak spotting parameters			#Peak spotting parameters			#Peak spotting parameters
Mass slice width	0.1		Mass slice width	0.1		Mass slice width	0.1		Mass slice width	0.1
Exclusion mass list (mass & tolerance)			Exclusion mass list (mass & tolerance)			Exclusion mass list (mass & tolerance)			Exclusion mass list (mass & tolerance)
#Deconvolution parameters			#Deconvolution parameters			#Deconvolution parameters			#Deconvolution parameters
Sigma window value	0.5		Sigma window value	0.5		Sigma window value	0.5		Sigma window value	0.5
MS2Dec amplitude cut off	0		MS2Dec amplitude cut off	0		MS2Dec amplitude cut off	0		MS2Dec amplitude cut off	0
Exclude after precursor	TRUE		Exclude after precursor	TRUE		Exclude after precursor	TRUE		Exclude after precursor	TRUE
Keep isotope until	0.5		Keep isotope until	0.5		Keep isotope until	0.5		Keep isotope until	0.5
Keep original precursor isotopes	FALSE		Keep original precursor isotopes	FALSE		Keep original precursor isotopes	FALSE		Keep original precursor isotopes	FALSE
#MSP file and MS/MS identification setting			#MSP file and MS/MS identification setting			#MSP file and MS/MS identification setting			#MSP file and MS/MS identification setting
MSP file	MS/MS libraries including NIST17, and all ESI positive MS/MS spectra from MoNA (https://mona.fiehnlab.ucdavis.edu/)		MSP file	MS/MS libraries including NIST17, and all ESI positive MS/MS spectra from MoNA (https://mona.fiehnlab.ucdavis.edu/)		MSP file	C:\Program Files\MSDIAL ver 4.24\LipidMsmsBinaryDB-VS68-FiehnO.lbm2		MSP file	C:\Program Files\MSDIAL ver 4.24\LipidMsmsBinaryDB-VS68-FiehnO.lbm2
Retention time tolerance	100		Retention time tolerance	100		Retention time tolerance	100		Retention time tolerance	100
Accurate mass tolerance (MS1)	0.005		Accurate mass tolerance (MS1)	0.005		Accurate mass tolerance (MS1)	0.005		Accurate mass tolerance (MS1)	0.005
Accurate mass tolerance (MS2)	0.01		Accurate mass tolerance (MS2)	0.01		Accurate mass tolerance (MS2)	0.01		Accurate mass tolerance (MS2)	0.001
Identification score cut off	90		Identification score cut off	85		Identification score cut off	85		Identification score cut off	85
Using retention time for scoring	FALSE		Using retention time for scoring	FALSE		Using retention time for scoring	FALSE		Using retention time for scoring	FALSE
Using retention time for filtering	FALSE		Using retention time for filtering	FALSE		Using retention time for filtering	FALSE		Using retention time for filtering	FALSE
#Text file and post identification (retention time and accurate mass based) setting			#Text file and post identification (retention time and accurate mass based) setting			#Selected lipid types			#Selected lipid types
Text file	Fiehn HILIC Library retention times (https://mona.fiehnlab.ucdavis.edu/)		Text file	Fiehn HILIC Library retention times (https://mona.fiehnlab.ucdavis.edu/)		CAR	[M]+		DGGA	[M-H]-
Retention time tolerance	0.2		Retention time tolerance	0.2		LPC	[M+H]+		ADGGA	[M-H]-
Accurate mass tolerance	0.005		Accurate mass tolerance	0.005		LPC	[M+Na]+		AHexCS	[M-H]-
Identification score cut off	85		Identification score cut off	85		LPE	[M+H]+		AHexCS	[M+CH3COO]-
						PC	[M+H]+		AHexBRS	[M-H]-
#Advanced setting for identification			#Advanced setting for identification			PC	[M+Na]+		AHexBRS	[M+CH3COO]-
Relative abundance cut off	0		Relative abundance cut off	0		PE	[M+H]+		AHexCAS	[M-H]-
Top candidate report	TRUE		Top candidate report	TRUE		PE	[M+Na]+		AHexCAS	[M+CH3COO]-
						PI	[M+NH4]+		AHexSIS	[M-H]-
#Adduct ion setting			#Adduct ion setting			PI	[M+Na]+		AHexSIS	[M+CH3COO]-
[M+H]+			[M-H]-			PS	[M+H]+		AHexSTS	[M-H]-
[M+NH4]+			[M+Cl]-			PS	[M+Na]+		AHexSTS	[M+CH3COO]-
[M+Na]+			[2M-H]-			PG	[M+NH4]+		SHex	[M+CH3COO]-
[2M+H]+						BMP	[M+NH4]+		SSulfate	[M-H]-
[2M+NH4]+						HBMP	[M+NH4]+		BASulfate	[M-H]-
[2M+Na]+						CL	[M+NH4]+		Cer	[M-H]-
						EtherLPC	[M+H]+		Cer	[M+CH3COO]-
#Alignment parameters setting			#Alignment parameters setting			EtherLPE	[M+H]+		BileAcid	[M-H]-
Reference file	Fifth Sample Analyzed chosen as reference sample		Reference file	Fifth Sample Analyzed chosen as reference sample		EtherPC	[M+H]+		BileAcid	[M+CH3COO]-
Retention time tolerance	0.05		Retention time tolerance	0.05		EtherPE	[M+H]+		DCAE	[M-H]-
MS1 tolerance	0.015		MS1 tolerance	0.015		Sph	[M+H]+		FA	[M-H]-
Retention time factor	0.5		Retention time factor	0.5		DHSph	[M+H]+		FAHFA	[M-H]-
MS1 factor	0.5		MS1 factor	0.5		PhytoSph	[M+H]+		NAGly	[M-H]-
Peak count filter	0		Peak count filter	0		SM	[M+H]+		NAGlySer	[M-H]-
N% detected in at least one group	0		N% detected in at least one group	0		SM	[M+Na]+		SL	[M-H]-
Remove feature based on peak height fold-change	TRUE		Remove feature based on peak height fold-change	TRUE		NAE	[M+H]+		LPC	[M+CH3COO]-
Sample max / blank average	5		Sample max / blank average	5		MGDG	[M+NH4]+		LPE	[M-H]-
Sample average / blank average	5		Sample average / blank average	5		DGDG	[M+NH4]+		LPS	[M-H]-
Keep identified and annotated metabolites	TRUE		Keep identified and annotated metabolites	TRUE		EtherMGDG	[M+NH4]+		LPG	[M-H]-
Keep removable features and assign the tag for checking	TRUE		Keep removable features and assign the tag for checking	TRUE		EtherDGDG	[M+NH4]+		LPI	[M-H]-
Gap filling by compulsion	TRUE		Gap filling by compulsion	TRUE		LDGTS	[M+H]+		LPA	[M-H]-
						DGTS	[M+H]+		PA	[M-H]-
#Tracking of isotope labels			#Tracking of isotope labels			LDGCC	[M+H]+		PC	[M+CH3COO]-
Tracking of isotopic labels	FALSE		Tracking of isotopic labels	FALSE		DGCC	[M+H]+		PE	[M-H]-
						SQDG	[M+NH4]+		PG	[M-H]-
#Ion mobility			#Ion mobility			DGGA	[M+NH4]+		PI	[M-H]-
Ion mobility data	FALSE		Ion mobility data	FALSE		SHexCer	[M+H]+		PS	[M-H]-
						GM3	[M+NH4]+		OxPC	[M+CH3COO]-
						ADGGA	[M+NH4]+		OxPE	[M-H]-
						MG	[M+NH4]+		OxPG	[M-H]-
						DG	[M+NH4]+		OxPS	[M-H]-
						DG	[M+Na]+		OxPI	[M-H]-
						EtherDG	[M+NH4]+		EtherOxPC	[M+CH3COO]-
						TG	[M+NH4]+		EtherOxPE	[M-H]-
						TG	[M+Na]+		PMeOH	[M-H]-
						EtherTG	[M+NH4]+		PEtOH	[M-H]-
						EtherTG	[M+Na]+		HBMP	[M-H]-
						CE	[M+NH4]+		LNAPE	[M-H]-
						BRSE	[M+NH4]+		LNAPS	[M-H]-
						CASE	[M+NH4]+		CL	[M-H]-
						SISE	[M+NH4]+		DLCL	[M-H]-
						STSE	[M+NH4]+		MLCL	[M-H]-
						AHexCS	[M+NH4]+		EtherPC	[M+CH3COO]-
						AHexBRS	[M+NH4]+		EtherPE	[M-H]-
						AHexCAS	[M+NH4]+		EtherPS	[M-H]-
						AHexSIS	[M+NH4]+		EtherPI	[M-H]-
						AHexSTS	[M+NH4]+		EtherPG	[M-H]-
						SHex	[M+NH4]+		EtherLPC	[M+CH3COO]-
						SSulfate	[M+NH4]+		EtherLPE	[M-H]-
						BASulfate	[M+NH4]+		EtherLPG	[M-H]-
						Cholesterol	[M+NH4]+		MGDG	[M+CH3COO]-
						Cholesterol	[M+Na]+		DGDG	[M+CH3COO]-
						Cholesterol	[M-H2O+H]+		EtherMGDG	[M+CH3COO]-
						CoQ	[M+H]+		EtherDGDG	[M+CH3COO]-
						Cer	[M+H]+		EtherSMGDG	[M-H]-
						Cer	[M+Na]+		SQDG	[M-H]-
						VAE	[M+H]+		SM	[M+CH3COO]-
						VAE	[M+Na]+		Cer_NS	[M-H]-
						DCAE	[M+NH4]+		Cer_NS	[M+CH3COO]-
						NAGly	[M+H]+		Cer_NDS	[M-H]-
						NAGly	[M+NH4]+		Cer_NDS	[M+CH3COO]-
						NAGlySer	[M+H]+		Cer_AS	[M-H]-
						NAGlySer	[M+NH4]+		Cer_AS	[M+CH3COO]-
						NAOrn	[M+H]+		Cer_ADS	[M-H]-
						SL	[M+H]+		Cer_ADS	[M+CH3COO]-
						SL	[M+NH4]+		Cer_BS	[M-H]-
						Cer_NS	[M+H]+		Cer_BS	[M+CH3COO]-
						Cer_NDS	[M+H]+		Cer_BDS	[M-H]-
						Cer_EOS	[M+H]+		Cer_BDS	[M+CH3COO]-
						Cer_AP	[M+H]+		Cer_NP	[M-H]-
						Cer_HS	[M+H]+		Cer_NP	[M+CH3COO]-
						Cer_HDS	[M+H]+		Cer_EOS	[M-H]-
						CerP	[M+H]+		Cer_EOS	[M+CH3COO]-
						HexCer_NS	[M+H]+		Cer_EODS	[M-H]-
						HexCer_NDS	[M+H]+		Cer_EODS	[M+CH3COO]-
						HexCer_AP	[M+H]+		Cer_AP	[M-H]-
						HexCer_EOS	[M+H]+		Cer_AP	[M+CH3COO]-
						HexCer_HS	[M+H]+		Cer_EBDS	[M+CH3COO]-
						HexCer_HDS	[M+H]+		CerP	[M-H]-
						Hex2Cer	[M+H]+		HexCer_NS	[M-H]-
						Hex3Cer	[M+H]+		HexCer_NS	[M+CH3COO]-
						PI_Cer	[M+H]+		HexCer_NDS	[M-H]-
						AHexCer	[M+H]+		HexCer_NDS	[M+CH3COO]-
						ASM	[M+H]+		HexCer_AP	[M-H]-
									HexCer_AP	[M+CH3COO]-
									HexCer_EOS	[M+CH3COO]-
									HexCer_HS	[M+CH3COO]-
									HexCer_HDS	[M+CH3COO]-
									Hex2Cer	[M+CH3COO]-
									Hex3Cer	[M+CH3COO]-
									PE_Cer	[M-H]-
									PI_Cer	[M-H]-
									AHexCer	[M+CH3COO]-
									ASM	[M+CH3COO]-
									SHexCer	[M-H]-
									GM3	[M-H]-
									Ac2PIM1	[M-H]-
									Ac2PIM2	[M-H]-
									Ac3PIM2	[M-H]-
									Ac4PIM2	[M-H]-
									LipidA	[M-H]-
						#Text file and post identification (retention time and accurate mass based) setting			#Text file and post identification (retention time and accurate mass based) setting
						Text file	Fiehn CSH lipid mass/charge library		Text file	Fiehn CSH lipid mass/charge library
						Retention time tolerance	0.2		Retention time tolerance	0.2
						Accurate mass tolerance	0.005		Accurate mass tolerance	0.005
						Identification score cut off	85		Identification score cut off	85
						#Advanced setting for identification			#Advanced setting for identification
						Relative abundance cut off	0		Relative abundance cut off	0
						Top candidate report	TRUE		Top candidate report	TRUE
						#Adduct ion setting			#Adduct ion setting
						[M+H]+			[M-H]-
						[M+NH4]+			[2M-H]-
						[M+Na]+
						[M+K]+
						[2M+H]+
						[2M+NH4]+
						[2M+Na]+
						[2M+K]+
						#Alignment parameters setting			#Alignment parameters setting
						Reference file	Fifth Sample Analyzed chosen as reference sample		Reference file	Fifth Sample Analyzed chosen as reference sample
						Retention time tolerance	0.05		Retention time tolerance	0.05
						MS1 tolerance	0.015		MS1 tolerance	0.015
						Retention time factor	0.5		Retention time factor	0.5
						MS1 factor	0.5		MS1 factor	0.5
						Peak count filter	0		Peak count filter	0
						N% detected in at least one group	0		N% detected in at least one group	0
						Remove feature based on peak height fold-change	TRUE		Remove feature based on peak height fold-change	TRUE
						Sample max / blank average	5		Sample max / blank average	5
						Sample average / blank average	5		Sample average / blank average	5
						Keep identified and annotated metabolites	TRUE		Keep identified and annotated metabolites	TRUE
						Keep removable features and assign the tag for checking	TRUE		Keep removable features and assign the tag for checking	TRUE
						Gap filling by compulsion	TRUE		Gap filling by compulsion	TRUE
						#Tracking of isotope labels			#Tracking of isotope labels
						Tracking of isotopic labels	FALSE		Tracking of isotopic labels	FALSE
						#Ion mobility			#Ion mobility
						Ion mobility data	FALSE		Ion mobility data	FALSE

## Sheet: SuppTable3
Chemical subclass	Count
Amino acids, peptides, and analogues	325
Glycerophosphocholines	57
Carbohydrates and carbohydrate conjugates	45
Fatty acids and conjugates	45
Triacylglycerols	31
Fatty acid esters	23
Glycosphingolipids	20
Phosphosphingolipids	16
Ceramides	13
Diacylglycerols	12
Amines	10
Bile acids, alcohols and derivatives	10
Glycerophosphoethanolamines	9
Lineolic acids and derivatives	9
Steroid esters	7
Alcohols and polyols	7
Benzoic acids and derivatives	7
Pyrimidines and pyrimidine derivatives	7
Purines and purine derivatives	6
Fatty acyl glycosides	5
Methoxyphenols	5
Pyridinecarboxylic acids and derivatives	5
Quaternary ammonium salts	5
Benzenediols	3
5'-deoxy-5'-thionucleosides	3
Arylsulfates	3
Dicarboxylic acids and derivatives	3
Flavonoid glycosides	3
Glycosylglycerols	3
Imidazoles	3
Indolyl carboxylic acids and derivatives	3
Pyrimidine 2'-deoxyribonucleosides	3
Steroidal glycosides	3
Hybrid peptides	2
Aniline and substituted anilines	2
Carbonyl compounds	2
Carboxylic acid derivatives	2
Cholestane steroids	2
Gamma butyrolactones	2
Hydroxycinnamic acids and derivatives	2
Hydroxycoumarins	2
Medium-chain hydroxy acids and derivatives	2
Short-chain keto acids and derivatives	2

## Sheet: SuppTable4
Metabolite name	MSI confidence level (doi: 10.1021/es5002105)	Average Retention Time (minutes)	Average m/z	Evidence for annotation	Adduct type	Assay	Correlation Cluster ID (manual)	ClassyFire Subclass	INCHIKEY	SMILES	MS1 isotopic spectrum	MS/MS spectrum	Sample_01	Sample_02	Sample_03	Sample_04	Sample_05	Sample_06	Sample_07	Sample_08	Sample_09	Sample_10	Sample_11	Sample_12	Sample_13	Sample_14	Sample_15	Sample_16	Sample_17	Sample_18	Sample_19	Sample_20	QC_01	QC_02	QC_03	QC_04
4-Hydroxyhippuric acid	lvl 1	5.916	194.044	MS & library MS/MS match & retention time match	[M-H]-	HILIC-	Bile Cluster 1	Benzoic acids and derivatives	ZMHLUFWWWPBTIU-UHFFFAOYSA-N	C1=CC(=CC=C1C(=O)NCC(=O)O)O	194.04454:244111 195.04789:27780 196.05125:0	58.41518:1759 65.82593:2504 74.02304:10102 76.99818:1838 79.96368:2046 93.03293:37022 100.00239:70840 111.21949:2092 117.61504:1856 140.22453:1840 150.05467:14312 158.28111:2242 194.04504:8141	0	595	147946	119207	63294	61648	89477	115418	102802	244111	194124	116069	144071	65901	110167	192212	140843	129107	33557	87541	93103	110974	107487	120173
Glycocholic acid	lvl 1	6.282	466.317	MS & library MS/MS match & retention time match	[M+H]+	HILIC+	Bile Cluster 1	Bile acids, alcohols and derivatives	RFDAIACWWDREDC-FRVQLJSFSA-N	C[C@H](CCC(=O)NCC(=O)O)[C@H]1CC[C@@H]2[C@@]1([C@H](C[C@H]3[C@H]2[C@@H](C[C@H]4[C@@]3(CC[C@H](C4)O)C)O)O)C	466.31693:391991808 467.32028:121038328 468.32364:20822328	57.39741:355615 76.03941:7878648 81.06991:1185792 85.06487:1310867 93.06971:347192 95.0854:607138 97.63321:260850 105.07015:550309 107.08543:1597695 107.8101:273692 109.10152:553871 111.08208:268109 114.10466:279390 119.08547:1190390 121.10111:720647 131.08604:575392 133.10139:683674 135.11694:642804 137.09621:288852 145.10136:604802 147.11771:1130784 157.10124:703929 158.08159:5257911 159.11717:…	100443	36872	601378496	583848768	353563456	308911808	398441152	469760064	351424320	725395776	777539520	636903808	578339776	406277728	558839808	741033216	527606880	470653120	200856112	446871776	480931584	516871296	479107744	486889856
Indoxyl sulfate	lvl 1	1.393	212.001	MS & library MS/MS match & retention time match	[M-H]-	HILIC-	Bile Cluster 1	Arylsulfates	BXFFHSIDQOFMLE-UHFFFAOYSA-N	C1=CC=C2C(=C1)C(=CN2)OS(=O)(=O)O	212.0009:424371 213.00425:58641 214.00761:37917	50.76408:2298 53.89878:2432 54.40732:2413 63.96083:71880 64.96864:193038 79.95566:143016 80.96352:124559 92.04882:60745 93.03305:3637 102.32748:2531 104.74979:2148 115.85896:2209 132.04393:43936 134.02625:10003 136.04196:37645 140.99985:47934 141.01103:3639 142.83232:2622 146.09589:71281 146.28587:2179 147.53979:2726 148.11145:168296 156.01067:25542 173.72792:2699 181.42706:2702 212.00056:200359 …	5342	21454	250055	342996	722900	323814	320909	334180	192486	390267	321332	283191	346087	197821	332568	437429	734250	799385	289110	678872	244151	382430	373648	428078
Lithocholylglycine	lvl 1	2.574	416.317	MS & library MS/MS match & retention time match	[M+H-H2O]+	HILIC+	Bile Cluster 1	Bile acids, alcohols and derivatives	XBSQTYHEGZTYJE-OETIFKLTSA-N	C[C@H](CCC(=O)NCC(=O)O)[C@H]1CC[C@@H]2[C@@]1(CC[C@H]3[C@H]2CC[C@H]4[C@@]3(CC[C@H](C4)O)C)C	416.31683:7883892 417.32018:2327454 418.32354:350938	55.05477:10873 57.07032:4473 60.84851:4874 64.77302:3985 65.51604:4021 67.05447:62735 69.06985:15273 75.2092:4356 76.03944:1639690 76.67469:4125 79.05444:28324 81.07001:228591 83.00111:4847 83.04952:4428 83.08571:62511 85.06493:267306 91.05463:17501 93.07007:94157 95.08567:212561 97.06514:9174 97.10153:23964 105.07014:84544 107.08573:190000 107.09193:7271 109.10139:173041 111.0807:18395 112.07598…	0	0	7883892	2025213	156680	112503	355213	1970248	146368	3813056	2652950	1279249	452407	331702	434888	172607	1343317	127213	0	5115	1047594	1114170	1002768	1102813
LPC 17:1	lvl 1	1.29	508.342	MS & library MS/MS match & retention time match	[M+H]+	CSH+	Bile Cluster 1	Glycerophosphocholines	LPMGFNAQZPADDZ-FJIRUFBNSA-N	CCCCCCC/C=C\CCCCCCCC(=O)OC[C@H](COP(=O)([O-])OCC[N+](C)(C)C)O	508.34125:1374978 509.3446:484306 510.34796:75517	73.04274:3234 86.09654:38992 90.49517:2380 104.10725:221721 124.99998:16033 184.07387:305188 196.25063:2482 201.33554:2961 202.55257:3104 265.64081:2930 312.61011:2534 325.27402:3939 424.82828:2479 490.33163:32258 508.34045:126865	0	0	4897856	4247724	1592042	604079	597122	1464801	468109	5305624	2920075	522707	335294	315963	345112	545034	1711009	790252	49204	119950	1021400	1324128	1300465	1429324
LPC 20:1	lvl 1	2.38	550.389	MS & library MS/MS match & retention time match	[M+H]+	CSH+	Bile Cluster 1	Glycerophosphocholines	GJTDRNFWIDPARY-GTPZACKGSA-N	CCCCCCCCCC/C=C\CCCCCCCC(=O)OC[C@H](COP(=O)([O-])OCC[N+](C)(C)C)O	550.38861:796430 551.39196:237625 552.39532:54547	76.09606:2562 85.84414:2694 86.09662:29222 104.10725:145223 105.21116:2696 125.00028:11045 130.70277:2769 155.63171:2702 184.07381:177186 202.54765:3766 258.11172:2707 532.37671:15476 550.38696:72329	0	3140	1294558	1474939	726458	314571	512403	749325	258248	1646406	1351064	1832564	1696180	322295	315189	505482	780491	300464	64705	150343	664995	800112	872831	946413
LPC 20:2	lvl 1	1.786	548.373	MS & library MS/MS match & retention time match	[M+H]+	CSH+	Bile Cluster 1	Glycerophosphocholines	YYQVCMMXPIJVHY-ZOIJLGJPSA-N	CCCCC/C=C\C/C=C\CCCCCCCCCC(=O)OC[C@H](COP(=O)([O-])OCC[N+](C)(C)C)O	548.37286:1040854 549.37621:444659 550.37957:96931	86.09676:57358 104.10726:293137 120.72639:2544 125.00004:17834 149.32985:2571 184.07385:307607 258.11237:2852 306.97037:2648 337.56592:3062 365.30814:4449 449.85608:2871 489.23981:19340 507.02078:3081 518.3103:2521 530.36127:31490 548.37708:121240	0	0	6722055	1805348	611563	194577	267045	720612	579396	2463911	2250798	497503	397282	250955	294003	476172	734851	280573	46990	125578	859132	1008457	1007904	1099914
LPC 22:4	lvl 1	1.625	572.374	MS & library MS/MS match & retention time match	[M+H]+	CSH+	Bile Cluster 1	Glycerophosphocholines	ZOJBSSVHFSBHMP-JJJSWPRASA-N	CCCCC/C=C\C/C=C\C/C=C\C/C=C\CCCCCC(=O)OC[C@H](COP(=O)([O-])OCC[N+](C)(C)C)O	572.3739:707411 573.37725:259859 574.38061:64535	71.07388:3142 73.44035:2680 86.09662:41683 104.10736:184586 125.00033:5929 184.07411:240842 194.6595:3395 202.5457:3944 258.11179:3642 262.25302:2586 333.50098:2588 334.94104:3329 410.45871:2699 510.08334:2610 554.36499:21722 572.37268:82560	0	0	394203	27551	0	0	0	12298	26817	109131	116086	0	0	0	6664	21472	6512	0	0	0	64425	64493	76689	51235
LPC 22:6	lvl 1	1.105	590.324	MS & library MS/MS match & retention time match	[M+Na]+	CSH+	Bile Cluster 1	Glycerophosphocholines	LSOWKZULVQWMLY-APPDJCNMSA-N	CC/C=C\C/C=C\C/C=C\C/C=C\C/C=C\C/C=C\CCC(=O)OC[C@H](COP(=O)([O-])OCC[N+](C)(C)C)O	590.32336:581845 591.32671:252544 592.33007:22179	77.26714:2460 86.09686:24102 104.10738:126271 108.37988:2790 125.47247:2790 146.9823:26514 169.29681:2782 194.14432:2816 196.64351:17257 280.52979:2874 329.60504:2786 344.55978:2725 407.25739:6582 531.24988:118535 590.32129:27285	0	0	3227515	770111	5086	0	8110	147928	170459	1584376	2444485	15344	0	141571	149328	226409	326790	45208	0	13684	480313	587742	639614	762913
LPC 14:0	lvl 1	0.936	468.311	MS & library MS/MS match & retention time match	[M+H]+	CSH+	Bile Cluster 1	Glycerophosphocholines	VXUOFDJKYGDUJI-OAQYLSRUSA-N	CCCCCCCCCCCCCC(=O)OC[C@H](COP(=O)([O-])OCC[N+](C)(C)C)O	468.31015:10501042 469.3135:2786992 470.31686:442124	71.07316:13536 71.08559:10626 74.49449:7464 84.07661:6686 86.09087:14806 86.0967:389381 95.08596:10248 104.10731:2081828 125.0002:138587 134.84712:8484 148.714:8081 150.23907:7246 163.01596:11400 164.90955:8850 168.76657:8461 184.07393:2617762 201.58162:9887 202.7979:7790 215.31993:6875 237.4021:8085 244.38553:7539 258.11084:40419 285.24426:99772 391.22647:12993 450.30026:249934 468.31009:1048627	3043	0	10501042	13141168	5057419	1626656	1831476	3207610	1211160	14198671	8424118	955984	648003	872906	1051365	1931893	4430739	1889656	180971	594531	3370080	4510428	4418266	4694194
LPC 15:0	lvl 1	1.158	482.326	MS & library MS/MS match & retention time match	[M+H]+	CSH+	Bile Cluster 1	Glycerophosphocholines	RJZVWDTYEWCUAR-JOCHJYFZSA-N	CCCCCCCCCCCCCCC(=O)OC[C@H](COP(=O)([O-])OCC[N+](C)(C)C)O	482.32562:15085850 483.32897:4660406 484.33233:911298	71.08585:18907 81.06973:14202 81.3022:13250 86.09669:495797 95.08604:12347 104.10729:3083594 113.92199:11671 125.00012:186223 135.26193:10845 145.09564:13186 153.48415:12589 159.56189:13353 166.48419:12947 184.07391:3979622 190.65276:12260 196.53415:24929 196.55634:75879 233.76013:12024 258.1124:28258 267.03702:11987 299.26013:154232 403.65939:12222 405.24274:21982 464.31488:385996 482.3255:15661…	0	0	19634298	19618448	6193814	2352860	2348068	5124962	1746169	25877842	16779182	2451228	1889050	1530978	1626724	3272537	7101903	3360484	237457	466702	5030904	6499188	5922296	6899399
LPC 16:0	lvl 1	1.444	496.341	MS & library MS/MS match & retention time match	[M+H]+	CSH+	Bile Cluster 1	Glycerophosphocholines	ASWBNKHCZGQVJV-HSZRJFAPSA-N	CCCCCCCCCCCCCCCC(=O)OC[C@H](COP(=O)([O-])OCC[N+](C)(C)C)O	496.34119:1076317696 497.34454:314880736 498.3479:57869104	71.07322:1559873 79.85886:852173 86.0909:1319492 86.0967:35016200 86.82445:996387 104.10726:229703136 113.98682:940508 115.38665:853885 125.00007:11891188 142.64394:759599 156.78354:920320 163.01538:951594 184.0739:291428160 196.89685:6380619 258.11111:2113520 313.27521:8926944 315.32672:938527 366.76013:998628 419.2572:3519028 478.32999:34708780 496.34134:132031112	428059	272678	1691761280	2048333696	1069839616	409389024	460866816	1026895936	339301408	2225408512	1554061184	493755392	374809152	253724752	273802432	512363488	1168465280	549827520	35789476	73988824	867527296	1066104832	1057778624	1199029888
LPC 16:1	lvl 1	1.048	494.326	MS & library MS/MS match & retention time match	[M+H]+	CSH+	Bile Cluster 1	Glycerophosphocholines	LFUDDCMNKWEORN-ZXEGGCGDSA-N	CCCCCC/C=C\CCCCCCCC(=O)OC[C@H](COP(=O)([O-])OCC[N+](C)(C)C)O	494.32568:21198266 495.32903:6723540 496.33239:1012253	71.07321:60997 81.07041:26246 81.17481:15987 83.08585:24720 86.04787:14558 86.09666:1103880 95.08556:22396 104.10729:5160318 125.00032:365211 156.97673:17092 163.0163:28045 181.02789:17078 184.07393:6858901 196.51781:127460 196.53618:14219 199.03754:16993 258.11203:101980 311.25845:205144 417.24133:26618 476.31393:569113 494.32553:2415706	0	0	46310124	75411592	23130492	8022056	7720980	16700602	5406264	83765344	51085596	8584113	5994382	5352582	5826066	15999962	27092804	10664002	651040	1026187	16753867	21219470	22006492	23807660
LPC 18:0	lvl 1	2.229	524.373	MS & library MS/MS match & retention time match	[M+H]+	CSH+	Bile Cluster 1	Glycerophosphocholines	IHNKQIMGVNPMTC-RUZDIDTESA-N	CCCCCCCCCCCCCCCCCC(=O)OC[C@H](COP(=O)([O-])OCC[N+](C)(C)C)O	524.3728:152964288 525.37615:57074064 526.37951:10641423	71.07323:592309 71.08604:152173 85.10141:160382 86.09666:8554689 104.10727:43600704 106.12353:120307 108.2855:126615 122.09537:121806 125.0002:3076334 137.56091:116143 155.1124:111555 163.01657:170509 184.07391:60197540 201.45038:213601 220.43463:123996 258.11182:1196054 341.30542:1587758 447.28937:265080 506.36136:5115256 524.3725:16442156	158453	119996	212861712	382055168	123910568	39262320	50181692	276562656	66526176	509081376	311624320	39146728	33673156	39843084	42932984	48468128	153086400	53653596	9330363	20553842	116930696	145080112	156308640	168998192
LPC 18:1	lvl 1	1.599	522.357	MS & library MS/MS match & retention time match	[M+H]+	CSH+	Bile Cluster 1	Glycerophosphocholines	YAMUFBLWGFFICM-PTGWMXDISA-N	CCCCCCCC/C=C\CCCCCCCC(=O)OC[C@H](COP(=O)([O-])OCC[N+](C)(C)C)O	522.35693:85076288 523.36028:26393878 524.36364:4920047	71.07323:245743 73.62382:48956 81.07011:63125 81.99789:50827 86.09666:4397741 101.47031:66147 104.10726:19726136 125.00023:1682838 148.095:54886 163.01616:103740 184.07388:26537272 197.99863:248373 240.80057:60898 258.11136:476678 339.2894:601346 445.27325:128150 504.26245:60253 504.34656:2289384 522.35687:9737942	83299	68699	466484928	281086592	116248696	35281020	47561656	81833040	31074248	296341280	155320256	58119776	48720044	18449288	19738310	28785698	94698056	36276856	4966366	10500337	63182060	83145648	89128480	94240272
LPC 18:2	lvl 1	1.191	520.341	MS & library MS/MS match & retention time match	[M+H]+	CSH+	Bile Cluster 1	Glycerophosphocholines	SPJFYYJXNPEZDW-FTJOPAKQSA-N	CCCCC/C=C\C/C=C\CCCCCCCC(=O)OC[C@H](COP(=O)([O-])OCC[N+](C)(C)C)O	520.34131:644855488 521.34466:203847872 522.34802:39353928	71.07321:1168219 80.72649:156244 81.07021:935687 86.09669:20888968 93.07044:246430 95.08607:877687 104.10729:99324776 107.0861:174131 108.05702:141038 108.09049:143926 109.10199:309155 115.25275:170538 123.11749:177221 125.00024:7802666 131.80263:155835 149.69896:193565 163.01604:766176 163.1489:157965 174.18126:172232 181.02695:276971 184.07393:136230832 187.46634:172167 203.66158:220411 251.172…	42639	34693	644855488	141603360	78147320	23133752	41575496	35592736	14210367	187853328	114933576	246985808	198918880	26990914	19163030	23572768	33794852	10489480	1957538	4197163	59666388	72746080	72541176	81065168
LPC 18:3	lvl 1	0.927	518.326	MS & library MS/MS match & retention time match	[M+H]+	CSH+	Bile Cluster 1	Glycerophosphocholines	WKQNRCYKYCKESD-YVHLTTHBSA-N	CC/C=C\C/C=C\C/C=C\CCCCCCCC(=O)OC[C@H](COP(=O)([O-])OCC[N+](C)(C)C)O	518.32599:16373597 519.32934:4302268 520.3327:844215	71.0733:52691 73.55946:12742 79.05456:12698 81.07027:12504 85.71928:13377 86.09665:688845 93.07016:24332 104.10728:3441476 107.08537:16539 110.84031:12080 116.77172:11882 125.0002:286604 148.231:11887 181.02696:20976 184.07393:4469660 196.53432:11959 197.06744:61258 220.00856:13358 239.70361:11265 241.68134:11919 258.11121:72888 335.25989:27414 442.48276:13271 500.31448:378075 518.32574:1504457	0	0	16373597	9665385	4110493	1150656	2230632	1690984	1651552	12814192	6907012	5078392	3533766	1190900	1321801	4716888	3023845	1583486	212425	360950	2937255	3848787	3767218	4267446
LPC 20:3	lvl 1	1.397	546.357	MS & library MS/MS match & retention time match	[M+H]+	CSH+	Bile Cluster 1	Glycerophosphocholines	BBNHCUBQEQJHIG-FZZJNMCHSA-N	CCCCC/C=C\C/C=C\C/C=C\CCCCCCC(=O)OC[C@H](COP(=O)([O-])OCC[N+](C)(C)C)O	546.35669:1880288 547.36004:800282 548.3634:0	85.07381:2662 86.09673:64399 98.9994:2899 102.77027:2504 104.1073:157255 110.12392:2752 114.63647:3124 125.00031:22771 125.13378:2592 136.70552:2751 184.07402:545979 196.92184:15965 214.54102:2855 304.18787:3404 361.60971:2504 528.34729:18720 546.35779:87587	0	0	40063428	6037353	517945	130769	166439	1545782	3928785	13272713	14326972	658675	300477	1021298	1663838	2067540	1880288	522803	216122	510434	3331866	3910674	4097992	4429416
LPC 20:4	lvl 1	1.161	544.341	MS & library MS/MS match & retention time match	[M+H]+	CSH+	Bile Cluster 1	Glycerophosphocholines	GOMVPVRDBLLHQC-VEJNOCSESA-N	CC/C=C\C/C=C\C/C=C\C/C=C\CCCCCCC(=O)OC[C@H](COP(=O)([O-])OCC[N+](C)(C)C)O	544.34149:250719984 545.34484:89864728 546.3482:17740512	71.07321:695164 79.05432:268026 79.53957:136553 81.07014:176596 86.09668:11838617 90.19724:138738 91.05461:298869 93.06969:213920 98.98464:140956 104.10731:52627644 105.06997:128025 119.08573:159948 125.00031:4827302 131.08549:129859 181.02654:222444 184.07396:65973644 196.6442:973389 258.1116:1028303 276.42374:125037 404.06015:136136 526.33075:5037426 544.34137:24795810	0	0	250719984	16433675	943549	230852	241778	4238036	7382074	57282824	54528016	645266	358810	2126586	2566599	3974356	6621496	1655845	633887	1101793	10828815	13825479	13316530	15069259
LPC 20:5	lvl 1	0.896	564.308	MS & library MS/MS match & retention time match	[M+Na]+	CSH+	Bile Cluster 1	Glycerophosphocholines	PDIGSOAOQOXRDU-WJPZTBRDSA-N	CC/C=C\C/C=C\C/C=C\C/C=C\C/C=C\CCCC(=O)OC[C@H](COP(=O)([O-])OCC[N+](C)(C)C)O	564.30798:660792 565.31133:281925 566.31469:23049	86.09682:22895 104.10725:145956 106.64269:2831 107.13614:2546 117.5457:2343 146.9821:26889 201.04793:3954 344.49976:2893 381.2413:3399 505.23425:122814 564.30579:37770	0	0	660792	97708	0	0	0	3844	4051	306170	179068	0	0	0	0	25919	76362	24311	0	0	19317	62398	49809	52376
LPC 22:5	lvl 1	1.268	570.357	MS & library MS/MS match & retention time match	[M+Na]+	CSH+	Bile Cluster 1	Glycerophosphocholines	YBUXFQUGNPBZPS-YNBHEIDWSA-N	CC/C=C\C/C=C\C/C=C\C/C=C\C/C=C\CCCC(=O)OC[C@H](COP(=O)([O-])OCC[N+](C)(C)C)O	570.35748:3442746 571.36083:1308334 572.36419:296968	71.07303:12147 81.07023:4472 82.60768:2679 86.09085:6362 86.09666:171670 93.07001:2869 95.08601:4538 96.28951:2736 104.10732:758148 109.91259:2503 115.72868:3184 125.00019:73560 146.98248:5889 184.07396:965845 196.76897:21151 218.88963:2891 237.32523:2870 240.5742:3019 258.11169:16705 387.29068:3347 511.27289:3662 552.34583:81235 553.82373:3811 570.35718:414559	0	0	3442746	519938	24813	3344	4189	141893	380946	1259993	1442817	43012	14573	92222	176742	220315	187751	63038	16487	64030	377368	402283	421419	486298
LPC o-16:0	lvl 1	1.72	482.362	MS & library MS/MS match & retention time match	[M+H]+	CSH+	Bile Cluster 1	Glycerophosphocholines	VLBPIWYTPAXCFJ-DEOSSOPVSA-N	CCCCCCCCCCCCCCCCOC[C@@H](COP(=O)([O-])OCC[N+](C)(C)C)O	482.36224:4899578 483.36559:1471032 484.36895:281302	71.07336:6568 71.08581:8178 75.04433:12517 85.10139:6513 86.09669:134707 95.55882:3098 101.30866:3425 104.10734:1300003 125.00029:73941 136.47887:3503 136.81447:4327 142.0294:3701 168.70477:3261 184.07401:219000 202.18103:6534 212.91226:3562 219.23135:3678 482.36206:508629	3289	3413	1206945	989224	65812	95561	302092	263593	185693	419511	503242	541449	398926	142939	323064	792262	195316	73277	29849	323431	742638	918490	895547	1058332
PC 32:0	lvl 1	5.548	734.573	MS & library MS/MS match & retention time match	[M+H]+	CSH+	Bile Cluster 1	Glycerophosphocholines	KILNVBDSWZSGLL-KXQOOQHDSA-N	CCCCCCCCCCCCCCCC(=O)OC[C@H](COP(=O)([O-])OCC[N+](C)(C)C)OC(=O)CCCCCCCCCCCCCCC	734.57172:7783206 735.57507:4371824 736.57843:1031819	71.073:35454 86.09665:728454 98.98468:29189 104.10703:68836 125.00015:345581 155.31131:6865 184.07384:8274722 190.06503:6657 200.51884:13743 239.27499:7486 302.26822:7491 477.82361:9698 478.32611:8829 496.34637:10784 734.42126:15566 734.57166:463271	515093	482084	15141213	29547486	8321278	2890225	8696820	5347590	4157000	29840352	21726984	4818396	5841788	3593921	3894936	18992626	28638528	12391875	265689	1791459	5204838	8914646	7671243	8933185
Phenylacetyl-L-glutamine	lvl 1	6.079	287.101	MS & library MS/MS match & retention time match	[M+Na]+	HILIC+	Bile Cluster 1	Amino acids, peptides, and analogues	JFLIEFSWGNOPJJ-JTQLQIEISA-N	C1=CC=C(C=C1)CC(=O)N[C@@H](CCC(=O)N)C(=O)O	287.10107:500212 288.10442:85008 289.10778:0	50.20535:1993 50.61843:2098 70.89284:1940 92.34421:1972 123.05301:18614 127.47642:2076 136.23466:2372 137.63623:2490 151.04778:4150 152.0321:12398 159.04233:3898 169.05873:8564 199.52573:3123 199.5434:4103 242.07974:4359 270.07474:34552 287.10101:212177	0	0	553762	446014	403790	298065	461727	346119	287459	500212	371320	266496	255399	166657	226005	382312	458281	444636	113148	379720	262082	286754	267077	282366
Taurocholic acid	lvl 1	6.29	514.282	MS & library MS/MS match & retention time match	[M-H]-	HILIC-	Bile Cluster 1	Bile acids, alcohols and derivatives	WBWWGRHZICKQGZ-HZAMXZRMSA-N	C[C@H](CCC(=O)NCCS(=O)(=O)O)[C@H]1CC[C@@H]2[C@@]1([C@H](C[C@H]3[C@H]2[C@@H](C[C@H]4[C@@]3(CC[C@H](C4)O)C)O)O)C	514.28278:614524 515.28613:220014 516.28949:29088	70.59816:2478 77.56152:2439 81.90549:2506 100.33609:2680 117.9181:2663 140.16045:2468 150.92625:2622 157.01321:2374 200.8037:2410 360.15829:3077 514.28247:631849	132265	77721	168700016	135691488	98846592	64902656	87563632	120199232	97704008	216577856	215783664	143697600	136773360	92884144	161835712	187888784	129292152	129680816	54030276	121704528	119140744	157331392	170814224	198863440
2-Deoxyuridine	lvl 1	3.325	227.066	MS & library MS/MS match & retention time match	[M-H]-	HILIC-	Bile Cluster 2	Pyrimidine 2'-deoxyribonucleosides	MXHRCPNRJAMMIM-SHYZEUOFSA-N	C1[C@@H]([C@H](O[C@H]1N2C=CC(=O)NC2=O)CO)O	227.0661:339305 228.06945:41252 229.07281:22909	58.35453:1791 83.97338:1880 94.02785:19073 113.33643:2130 121.06335:2332 139.07489:2661 148.6747:2187 184.0601:39719 199.60123:9064 227.0563:3794	0	0	0	11683	0	803	12665	212464	135847	193234	60048	172380	124033	20515	196548	152863	22493	5202	10584	648937	257682	296620	322985	349838
Creatinine	lvl 1	5.102	114.066	MS & library MS/MS match & retention time match	[M+H]+	HILIC+	Bile Cluster 2	Amino acids, peptides, and analogues	DDRJAANPRJIHGJ-UHFFFAOYSA-N	CN1CC(=O)N=C1N	114.06634:350902496 115.06969:23765856 116.07305:1480515	72.0444:513097 86.07137:7367235 104.08184:372991 107.22854:330901 114.0664:52767288	21325172	49029796	165773392	261060464	145003824	218115920	251912224	349951616	213351984	302128032	328888000	419819328	403641408	292151168	326301568	409724960	323144160	323579104	215415296	326293984	342905888	343930080	347352224	338660928
Cystine	lvl 1	10.035	241.032	MS & library MS/MS match & retention time match	[M+H]+	HILIC+	Bile Cluster 2	Amino acids, peptides, and analogues	LEVWYRKDKASIDU-IMJSIDKUSA-N	C([C@@H](C(=O)[O-])[NH3+])SSC[C@@H](C(=O)[O-])[NH3+]	241.03157:1021470 242.03492:39862 243.03828:118454	56.90883:2081 58.6657:2046 70.34129:1962 74.00599:15231 74.0238:68092 87.89574:1965 120.01163:166050 122.02722:105061 151.9838:244752 153.36993:2222 153.99921:22381 177.99963:11317 182.91801:2163 195.02599:29448 196.17027:3409 241.00493:4510 241.03165:110611	373020	94428	472622	294110	28456	21294	132101	589380	291911	529071	920281	3675876	2889088	652117	903491	861247	1089750	417541	156115	1369070	1199416	1192136	1155545	1149568
PC 32:1	lvl 1	4.971	732.557	MS & library MS/MS match & retention time match	[M+H]+	CSH+	Bile Cluster 3	Glycerophosphocholines	QIBZFHLFHCIUOT-NPBIGWJUSA-N	CCCCCCCCCCCCCCCC(=O)OC[C@H](COP(=O)([O-])OCC[N+](C)(C)C)OC(=O)CCCCCCC/C=C\CCCCCC	732.5564:1238463 733.55975:748530 734.56311:149580	71.073:4528 84.19355:2879 86.09663:81931 97.93241:2999 104.10713:7475 111.97705:3359 125.00035:38414 184.07394:1122370 373.92096:3386 732.55524:97324	0	0	1238463	14162538	15268773	1173426	2826406	2503538	1153200	121046048	44088412	734626	1031196	324182	1035040	11503619	27077344	7071162	5747	11652	4966110	6592050	8855008	8708538
PC 34:1	lvl 1	5.609	782.57	MS & library MS/MS match & retention time match	[M+Na]+	CSH+	Bile Cluster 3	Glycerophosphocholines	WTJKGGKOPKCXLL-VYOBOKEXSA-N	CCCCCCCCCCCCCCCC(=O)OC[C@H](COP(=O)([O-])OCC[N+](C)(C)C)OC(=O)CCCCCCC/C=C\CCCCCCCC	782.56964:21695608 783.57299:12005916 784.57635:2854016	71.07321:152170 71.08566:127754 79.05496:16260 81.07009:149131 83.08584:159385 85.10132:102434 86.09672:1452997 91.17837:17269 92.41408:17998 93.06976:20630 95.08587:270180 95.99586:16052 96.74133:17647 97.10134:111374 97.6131:17436 107.08628:15212 109.1015:145168 111.11717:33335 121.10149:37343 123.11732:67578 135.11737:71589 137.13321:36600 146.9823:4359644 149.13197:17995 163.14726:28274 164.9…	5882	4842	793936	14464554	19673974	1520950	2859517	3246273	1822713	17158254	20771192	693879	1022021	569012	1276871	13647823	21695608	12317676	7966	24367	6276478	9726646	9773750	10938619
PC 34:2	lvl 1	5.133	758.572	MS & library MS/MS match & retention time match	[M+H]+	CSH+	Bile Cluster 3	Glycerophosphocholines	JLPULHDHAOZNQI-ZTIMHPMXSA-N	CCCCCCCCCCCCCCCC(=O)OC[C@H](COP(=O)([O-])OCC[N+](C)(C)C)OC(=O)CCCCCCC/C=C\C/C=C\CCCCC	758.5719:112203440 759.57525:79427608 760.57861:20767628	71.07323:287669 81.07038:35072 86.09666:5607463 98.98461:307343 104.10719:480886 124.98979:83577 125.00027:2587280 131.06387:42351 138.54277:41028 143.80338:35754 184.0739:67476304 200.5202:68075 221.89714:35712 222.15973:33505 478.32913:50912 484.33087:36830 496.34036:133049 575.51117:41575 630.4201:43876 758.57208:5687880	395182	350509	5038008	50238988	258376688	17501118	14460416	15760801	5740035	1234574208	166250432	1019634	3153290	1188115	830045	38162184	568310016	138593920	61323	40136	72528104	107715744	117302624	145888560
PC 34:3 (PC 16:0_18:3)	lvl 1	4.815	756.557	MS & library MS/MS match & retention time match	[M+H]+	CSH+	Bile Cluster 3	Glycerophosphocholines	VKVSSDKCKXJFIM-AFYHZPHLSA-N	CCCCCCCCCCCCCC(=O)O[C@H](COC(=O)CCCCCC/C=C\C/C=C\C/C=C\CCCCC)COP(=O)([O-])OCC[N+](C)(C)C	756.55652:9196064 757.55987:4499814 758.56323:1044575	71.07318:58316 86.09666:970627 98.98444:52584 104.1072:105370 125.00023:457351 159.61101:7766 184.07387:10901143 478.33975:9468 496.34058:11203 500.31592:7841 637.54224:7808 641.64246:7482 731.57452:7886 756.55609:743725	0	7431	17653	885983	9196064	666506	815281	2310378	928677	40830392	17848910	111823	251196	479023	656848	7105922	12034708	5655654	10397	6656	2485386	3011146	3399300	4159802
PC 35:2	lvl 1	5.447	772.588	MS & library MS/MS match & retention time match	[M+H]+	CSH+	Bile Cluster 3	Glycerophosphocholines	MJWAVUYQCBFFHQ-WESJWMGVSA-N	CCCCCCCCCCCCCCCCC(=O)O[C@H](COC(=O)CCCCCCC/C=C\C/C=C\CCCCC)COP(=O)([O-])OCC[N+](C)(C)C	772.58649:471738 773.58984:225904 774.5932:34948	71.20005:2621 86.09687:37793 105.60046:2832 125.00031:20986 132.47308:3031 159.23984:2812 168.90259:3047 184.07405:473913 186.05209:4292 202.52412:4245 231.27899:3576 232.60425:3268 298.26807:3303 350.6189:3428 513.11212:3816 772.58777:38107	0	0	10489	578576	2506129	203762	459310	398167	146642	17065088	4090656	89260	195583	15729	133839	1405437	3813162	729096	0	0	1187133	1536591	1600762	1752175
PC 36:1	lvl 1	6.279	788.62	MS & library MS/MS match & retention time match	[M+H]+	CSH+	Bile Cluster 3	Glycerophosphocholines	ATHVAWFAEPLPPQ-VRDBWYNSSA-N	CCCCCCCCCCCCCCCCCC(=O)OC[C@H](COP(=O)([O-])OCC[N+](C)(C)C)OC(=O)CCCCCCC/C=C\CCCCCCCC	788.61932:2080424 789.62267:948724 790.62603:240780	71.07307:15942 72.15081:3389 86.09668:208393 98.90561:3469 98.98481:7438 101.38799:3192 104.10736:19753 112.1653:3328 125.00031:116172 184.07394:2247446 186.0536:3662 201.53699:6096 257.93326:3247 713.59998:4068 788.45764:6554 788.61786:133261	28971	12482	257595	2250108	3428481	389951	896898	1188244	649627	17924050	4682706	231973	380961	193248	323172	2223088	7014495	2080424	0	5755	1117805	1666179	1808211	2151768
PC 36:2	lvl 1	5.77	786.604	MS & library MS/MS match & retention time match	[M+H]+	CSH+	Bile Cluster 3	Glycerophosphocholines	SNKAWJBJQDLSFF-NVKMUCNASA-N	CCCCCCCC/C=C\CCCCCCCC(=O)OC[C@H](COP(=O)([O-])OCC[N+](C)(C)C)OC(=O)CCCCCCC/C=C\CCCCCCCC	786.60376:20017714 787.60711:11023783 788.61047:3167157	71.0732:201508 86.09666:2907266 98.98426:136802 104.1075:231068 125.00023:1382476 144.08743:18466 184.07391:25460486 200.9511:40558 248.28072:19476 349.02072:18339 786.60382:1594697	106625	94166	377416	3868077	20017714	1235206	1377860	2540266	925788	181724464	12701731	234170	839017	137052	318265	4147118	63699388	7780091	0	5501	6515153	7329077	8864348	9462123
PC 36:4	lvl 1	5.04	782.573	MS & library MS/MS match & retention time match	[M+H]+	CSH+	Bile Cluster 3	Glycerophosphocholines	IIZPXYDJLKNOIY-JXPKJXOSSA-N	CCCCCCCCCCCCCCCC(=O)OC[C@H](COP(=O)([O-])OCC[N+](C)(C)C)OC(=O)CCC/C=C\C/C=C\C/C=C\C/C=C\CCCCC	782.57233:18988874 783.57568:12815033 784.57904:3566049	71.07334:106193 86.09663:1831288 98.98437:87983 104.1072:157240 118.06844:16193 124.98988:30079 125.00023:900516 141.98413:17270 150.61545:17497 168.12532:13556 184.07385:16106797 202.27142:15691 203.57515:17162 203.5975:14720 245.05304:16772 782.57172:954932	33854	11374	31436	1049610	94117648	1223238	1147430	7540796	964541	419802400	94207400	67458	262293	981535	212243	16683041	137407712	41935232	0	0	14193097	18808544	21536530	23563204
PC 36:4 (PC 18:2_18:2)	lvl 1	4.743	782.573	MS & library MS/MS match & retention time match	[M+H]+	CSH+	Bile Cluster 3	Glycerophosphocholines	NKQPOVROGSWLTO-NVPMBMBWSA-N	CCCCCCCC/C=C\CCCCCCCC(=O)O[C@H](COC(=O)CCCC/C=C\C/C=C\C/C=C\CCCCC)COP(=O)([O-])OCC[N+](C)(C)C	782.57227:27321080 783.57562:15534838 784.57898:4572380	71.07331:224939 86.09666:3101359 89.76843:22909 98.98452:127838 103.74661:22085 104.10729:269108 125.00026:1544824 170.58755:24436 183.38113:28307 184.07394:32125420 201.70824:28099 502.32703:25858 520.3443:48665 782.57263:2095141	5281	0	11486	314430	8028054	148445	130676	377696	106632	33575664	3142045	7675	76156	29127	25840	1164472	8993332	1763833	0	0	1388476	2185005	2186228	2370038
PC 36:5	lvl 1	4.648	780.557	MS & library MS/MS match & retention time match	[M+H]+	CSH+	Bile Cluster 3	Glycerophosphocholines	SUZYROYNFNQALJ-MHEIZRSESA-N	CCCCCCCCCCCCCCCC(=O)O[C@H](COC(=O)CCC/C=C\C/C=C\C/C=C\C/C=C\C/C=C\CC)COP(=O)([O-])OCC[N+](C)(C)C	780.55688:2062832 781.56023:1168668 782.56359:363355	71.07308:17273 79.5451:3429 86.09664:280928 98.98453:15265 104.10738:25201 108.7442:3982 125.00024:138301 183.37895:3730 184.07391:2886284 201.09296:5311 201.11182:3747 415.28949:3709 466.37686:3833 497.27682:3908 780.55627:178465	0	0	5687	100055	10305183	138051	123674	891683	126500	43754752	8676510	0	9437	116563	6757	2105228	13591599	3899063	5030	0	1844638	2430452	2808506	3275555
PC 38:5	lvl 1	5.094	830.57	MS & library MS/MS match & retention time match	[M+Na]+	CSH+	Bile Cluster 3	Glycerophosphocholines	SUACBSWYGWBPFC-GPUJSUHJSA-N	CCCCC/C=C\C/C=C\CCCCCCCC(=O)O[C@H](COC(=O)CCCCCC/C=C\C/C=C\C/C=C\CCCCC)COP(=O)([O-])OCC[N+](C)(C)C	830.56976:1834554 831.57311:1693908 832.57647:464745	71.07306:17891 71.08582:4345 79.05444:7059 79.66692:3120 81.07012:16683 82.76027:2999 83.08572:6626 85.10127:5128 86.09669:154560 91.05433:13967 93.07007:7931 95.08591:17577 97.10162:5406 105.07085:4944 107.0857:3788 109.10143:7736 117.07012:4350 119.08558:5164 121.10132:4337 121.42579:3390 146.98227:277500 159.11728:4213 197.32756:16323 290.72009:4158 319.62747:3443 338.41556:3462 339.29388:5938…	0	0	0	8320	948381	6391	0	170964	17981	1834554	1658806	0	0	28482	0	388961	1213715	514668	0	0	212616	265822	328862	365286
(4-Aminobutyl)guanidine	lvl 1	9.076	131.13	MS & library MS/MS match & retention time match	[M+H]+	HILIC+	Food Cluster 1	Guanidines	QYPPJABKJHAVHS-UHFFFAOYSA-N	C(CCN=C(N)N)CN	131.1295:3615780 132.13285:265976 133.13621:0	51.50025:1823 53.18874:1713 60.05599:93982 71.82185:2015 72.08099:245682 97.07614:10500 104.93101:2054 114.09438:3898 114.10294:67016 131.12962:37268	104805	87195	36931	157290	87355	93292	146186	151892	40597	43686	278165	2559097	2571790	1307134	180477	219281	0	0	13288	97629	376256	372561	373810	402967
1-Methylnicotinamide	lvl 1	6.367	137.071	MS & library MS/MS match & retention time match	[M]+	HILIC+	Food Cluster 1	Pyridinecarboxylic acids and derivatives	LDHMAVIPBRSVRG-UHFFFAOYSA-O	C[N+]1=CC=CC(=C1)C(=O)N	137.07146:742353 138.07481:0 139.07817:802112	52.45768:1982 53.96669:1743 60.04451:1879 74.95284:1923 94.06544:38359 106.69992:1981 108.39187:2080 110.06038:9508 137.07137:358766	129280	199120	396090	714907	252571	268478	430809	705884	495092	731836	750582	912787	967284	742353	602527	780394	247052	203345	156625	282389	498965	459735	469731	485081
2-Methylglutaric acid	lvl 1	2.368	145.049	MS & library MS/MS match & retention time match	[M-H]-	HILIC-	Food Cluster 1	Fatty acids and conjugates	AQYCMVICBNBXNA-UHFFFAOYSA-N	CC(CCC(=O)O)C(=O)O	145.04897:265578 146.05232:18665 147.05568:0	66.20158:1862 76.4388:2277 78.43049:1852 83.70799:2163 95.77864:1706 101.05935:11281 111.79553:2071 115.9193:9116 139.02458:1843	35792	67587	58327	69517	62619	63998	59354	244892	201872	90990	194518	214733	334002	265578	129171	101491	68939	66586	54886	67080	100197	124895	131388	141644
Acetaminophen glucuronide	lvl 1	7.895	326.087	MS & library MS/MS match & retention time match	[M-H]-	HILIC-	Food Cluster 1	Carbohydrates and carbohydrate conjugates	IPROLSVTVHAQLE-BYNIDDHOSA-N	CC(=O)NC1=CC=C(C=C1)O[C@H]2[C@@H]([C@H]([C@@H]([C@H](O2)C(=O)O)O)O)O	326.08707:182260 327.09042:30793 328.09378:0	55.58847:2145 59.01218:9639 68.44427:2419 75.00719:5131 79.73708:2267 85.02771:14136 93.15557:2190 93.33006:2197 95.01247:2017 99.0071:2798 113.02277:28338 150.05475:22512 258.14484:3547	0	0	0	0	0	25784	76643	182260	184605	297926	231513	159757	226089	60710	77400	130502	43699	17292	1908	15561	30370	52004	50591	63556
Chlorogenic acid	lvl 1	7.325	353.087	MS & library MS/MS match & retention time match	[M-H]-	HILIC-	Food Cluster 1	Alcohols and polyols	CWVRJTMFETXNAD-JUHZACGLSA-N	C1[C@H]([C@H]([C@@H](C[C@@]1(C(=O)O)O)OC(=O)/C=C/C2=CC(=C(C=C2)O)O)O)O	353.0867:1400324 354.09005:260644 355.09341:89098	53.62831:2341 67.01715:2837 85.02766:3839 93.03296:14118 111.04356:3937 119.6245:2075 135.04356:118212 137.02249:3620 155.03314:11073 161.02299:18008 173.04402:151945 173.91922:2716 174.04721:4884 179.03357:276668 191.05473:656770 192.05815:15958 198.71371:12268 246.65828:2296 291.90619:2446 353.08588:56053	92749	45475	19176	550757	421563	205635	246246	855362	859890	612091	1020474	1400324	2217302	1641428	1391721	1237007	119049	56804	37855	28999	499084	710604	649564	651248
Ferulic acid	lvl 1	1.417	193.049	MS & library MS/MS match & retention time match	[M-H]-	HILIC-	Food Cluster 1	Hydroxycinnamic acids and derivatives	KSEBMYQBYZTDHS-HWKANZROSA-N	COC1=C(C=CC(=C1)/C=C/C(=O)O)O	193.04909:357477 194.05244:65351 195.0558:14579	60.72783:1914 90.67068:2055 94.53725:1880 100.2841:1835 134.03558:163064 137.0226:12183 137.37793:2325 139.03851:2614 149.05908:35595 168.19621:2508 178.02542:85574 180.064:2329 193.02367:2670 193.02783:3177 193.04858:37648	12632	12124	95154	119518	34045	17633	18818	202759	159305	108655	215290	588527	685063	227276	202385	178296	16323	5946	11856	23318	182908	211708	219045	236721
Glutamine	lvl 1	8.72	147.077	MS & library MS/MS match & retention time match	[M+H]+	HILIC+	Food Cluster 1	Amino acids, peptides, and analogues	ZDXPYRJPNDTMRX-VKHMYHEASA-N	C(CC(=O)N)[C@@H](C(=O)[O-])[NH3+]	147.07677:33763624 148.08012:2183070 149.08348:159247	83.81983:21861 84.03891:32970 84.0446:974469 89.09519:21551 94.83045:24075 101.07082:93978 118.83428:20330 130.03984:44776 130.05017:898526 132.65627:20753 143.99806:21887	882244	2671355	9387998	22800716	4201148	6457776	20863930	33598816	13822129	24437862	40058360	217173168	123372176	30076720	25835104	28321030	12563371	6496181	3646194	13807182	32784652	33273666	34423428	33903532
N8-Acetylspermidine	lvl 1	8.973	188.176	MS & library MS/MS match & retention time match	[M+H]+	HILIC+	Food Cluster 1	Carboximidic acids	FONIWJIDLJEJTL-UHFFFAOYSA-N	CC(=O)NCCCCNCCCN	188.17627:928110 189.17962:66092 190.18298:0	57.04507:8819 58.82514:2008 63.70475:2503 70.06537:64669 71.04932:11399 72.081:310073 74.07133:3677 88.07565:4909 100.07596:227039 100.30655:2244 113.6955:2187 114.05531:109994 117.10254:51836 117.47723:2068 122.91001:2149 126.10231:2492 142.0873:14586 144.1134:4059 146.08186:2791 163.62289:2078 170.08218:2198 171.14955:126858 188.07224:2349 188.10593:33709 188.17627:109768	289473	364410	178387	841711	555230	1262547	1229502	2482038	2371323	3355719	2495412	3163128	3325086	1326295	2179727	2440304	428534	551119	686564	2092717	1400468	1415318	1432040	1462778
N-Acetyltryptophan	lvl 1	2.922	247.108	MS & library MS/MS match & retention time match	[M+H]+	HILIC+	Food Cluster 1	Amino acids, peptides, and analogues	DZTHIGRZJZPRDV-GFCCVEGCSA-N	CC(=O)N[C@H](CC1=CNC2=CC=CC=C21)C(=O)O	247.10828:568548 248.11163:44559 249.11499:0	50.15846:1996 70.93688:1899 78.21437:2136 84.27728:1893 90.02415:1925 124.08736:3575 130.06546:28787 132.08144:2761 144.0811:2797 146.05995:11644 157.15526:2045 159.07707:3083 159.09201:87677 170.06052:9191 175.42911:2338 187.08667:17320 188.07111:115269 201.1026:81586 205.09752:21282 229.09827:7583 247.10948:9014	4925	0	36111	159881	17674	0	0	775178	276028	199645	732064	861503	1096068	1213820	432053	369892	8871	0	0	0	389048	417079	426706	392900
Pseudouridine	lvl 1	7.14	243.061	MS & library MS/MS match & retention time match	[M-H]-	HILIC-	Food Cluster 1		PTJWIQPHWPFNBW-GBNDHIKLSA-N	C1=C(C(=O)NC(=O)N1)[C@H]2[C@@H]([C@@H]([C@H](O2)CO)O)O	243.0612:198341 244.06455:23307 245.06791:12693	50.59815:1867 53.15471:1855 75.78719:1998 78.16715:1954 82.87178:2323 85.65792:1835 95.45031:2052 96.04315:2090 99.11242:2072 110.02319:5024 111.01866:2456 118.56298:1999 132.42209:2109 140.03406:10107 146.34502:2132 147.89551:2142 153.02895:111533 168.21057:1959 183.03963:9978 200.03731:4038 200.05583:3728 243.06244:19364 243.08571:2754	2044	8470	38079	112906	40400	143580	313544	98722	198341	178406	183449	249030	312457	180971	171583	248230	67688	53009	23343	150862	149542	158711	211375	228836
Quinic acid	lvl 1	9.684	191.055	MS & library MS/MS match & retention time match	[M-H]-	HILIC-	Food Cluster 1	Alcohols and polyols	AAWZDTNXLSGCEK-LNVDRNJUSA-N	C1[C@H](C([C@@H](CC1(C(=O)O)O)O)O)O	191.05475:11892674 192.0581:969539 193.06146:137800	57.03306:8786 59.01226:71447 65.70753:6227 67.01738:7510 71.01234:46586 73.02766:11891 78.90827:5315 81.03323:10749 83.04858:9433 85.02791:527626 87.00713:92553 93.03294:147401 99.04397:12878 102.94711:11951 109.02756:44663 111.00713:25975 111.04368:61839 127.0385:165810 137.02344:5478 145.04912:5635 149.23079:5408 155.03441:12961 171.02827:40122 173.04398:112193 190.33264:6117 191.05472:6702826	1201356	627434	287221	11892674	6434924	5829836	8229415	22555322	18295206	4896856	18389292	21320136	32309256	29798718	28060738	17669302	2009540	853919	658012	466370	2717346	4870067	2770858	2625716
Shikimic acid	lvl 1	8.037	173.044	MS & library MS/MS match & retention time match	[M-H]-	HILIC-	Food Cluster 1	Alcohols and polyols	JXOHGGNKMLTUBP-HSUXUTPPSA-N	C1[C@H]([C@@H]([C@@H](C=C1C(=O)O)O)O)O	173.04405:600461 174.0474:73705 175.05076:12399	51.80973:1772 59.01231:2174 60.568:1725 67.01713:3884 69.03299:24776 71.01231:3845 73.0278:8713 74.62029:1934 75.007:2329 78.76935:1860 83.04855:2938 85.0278:2525 87.00706:2159 93.03294:90742 99.04344:17055 111.00709:3450 111.04379:25041 111.85855:2040 113.02271:26338 119.14732:2050 143.0329:2654 154.94576:101866 155.03336:16463 172.95676:17493 173.04399:248133	40094	22754	21085	213441	62025	25741	37434	354599	474794	303388	513467	615041	1021700	778918	556275	426497	14506	9058	5914	7570	193721	254823	246181	276883
1-Methyladenosine	lvl 1	7.516	282.121	MS & library MS/MS match & retention time match	[M+H]+	HILIC+	Food Cluster 2	Purine nucleosides	GFYLSDSUCHVORB-IOSLPCCCSA-N	CN1C=NC2=C(C1=N)N=CN2[C@H]3[C@@H]([C@@H]([C@H](O3)CO)O)O	282.12048:3089056 283.12383:551400 284.12719:0	57.03393:2658 91.37479:2453 133.04996:3508 141.10843:2451 150.07785:2855507 248.9278:3454 255.28157:2478 282.12042:315015	6269	27869	91448	625357	1243261	2606048	5139392	1690329	794647	1032630	1344905	1222050	1683790	1078047	1106653	1393810	158165	147782	135491	457938	1066756	1105576	974508	1173445
Abscisic acid	lvl 1	1.314	263.128	MS & library MS/MS match & retention time match	[M-H]-	HILIC-	Food Cluster 2	Sesquiterpenoids	JLIDBLDQVAYHNE-LXGGSRJLSA-N	CC1=CC(=O)CC(C1(/C=C/C(=C\C(=O)O)/C)O)(C)C	263.12772:282086 264.13107:67856 265.13443:7390	90.18049:1890 93.12509:2162 97.0278:2492 111.04343:4229 113.05894:2782 123.08025:2785 125.05925:3892 125.09516:2300 136.05072:2583 139.075:15330 151.07455:31116 152.04555:2704 152.08292:12584 153.09039:4111 163.07437:2568 186.10332:2163 201.12761:17998 203.10524:2009 204.11436:28323 219.13754:50067 263.12796:5130	0	0	1008	143546	46988	10304	13578	6881	783	929	1189	1567	2605	0	889	0	700	0	0	0	837	5528	6182	6615
Acetaminophen	lvl 1	1.387	152.071	MS & library MS/MS match & retention time match	[M+H]+	HILIC+	Food Cluster 2	1-hydroxy-2-unsubstituted benzenoids	RZVAJINKPMORJF-UHFFFAOYSA-N	CC(=O)NC1=CC=C(C=C1)O	152.07085:310497 153.0742:0 154.07756:24817	59.04937:7400 62.25986:2088 70.34848:1980 73.06466:2126 89.06001:2371 90.06325:3482 102.37042:1831 106.06553:7729 107.04933:39963 109.0284:3357 134.06:10682 135.04433:61457 152.07088:109855 152.08475:3832 152.1071:15123 (Used spectra from Sample _015 since it has highest abundance for acetaminophen)	117494	49610	98505	84729	478348576	68653648	13931169	9260375	6997485	7880945	7467444	5804188	4516410	4006935	2989520	3656716	2679636	2145378	1447473	1578337	32676232	32071210	29872972	29633232
Arabitol or xylitol	lvl 1	7.148	151.06	MS & library MS/MS match & retention time match	[M-H]-	HILIC-	Food Cluster 2	Carbohydrates and carbohydrate conjugates	HEBKCHPVOIAQTA-QWWZWVQMSA-N	C([C@H](C([C@@H](CO)O)O)O)O	151.0596:2370945 152.06295:149400 153.06631:29891	52.67992:1662 57.03296:1988 59.01227:65547 59.01565:2669 59.40165:2063 67.19761:1873 71.01225:75088 73.02802:16677 83.01212:3662 85.02781:4309 89.02278:41795 101.02274:40468 113.02273:3720 131.03372:3013 136.40723:2152 151.05965:48729	322343	255383	506744	3172321	4827329	3499559	3241359	1476036	800209	791622	1400911	1649042	2272341	1590085	908526	1040303	840748	950562	538779	891338	1605934	2009413	2053950	2076597
Isorhamnetin-3-O-rutinoside	lvl 1	6.187	625.178	MS & library MS/MS match & retention time match	[M+H]+	HILIC+	Food Cluster 2	Flavonoid glycosides	UIDGLYUNOUKLBM-GEBJFKNCSA-N	C[C@H]1[C@@H]([C@H]([C@H]([C@@H](O1)OC[C@@H]2[C@H]([C@@H]([C@H]([C@@H](O2)OC3=C(OC4=CC(=CC(=C4C3=O)O)O)C5=CC(=C(C=C5)O)OC)O)O)O)O)O)O	625.1778:1047764 626.18115:558815 627.18451:147849	57.03387:6787 69.01434:2685 69.03367:5235 69.48917:3267 71.04938:107792 75.04443:3732 75.965:2877 82.88441:3098 83.04942:3139 84.34964:2883 85.02863:167948 97.02851:12651 99.04454:3673 112.32376:2796 127.03926:6591 129.05499:48429 145.04977:6225 147.0654:6608 190.77876:2770 285.04169:4494 302.04321:19872 317.0665:1491735 324.34338:2926 533.35309:3034	0	0	0	478373	1214058	1257856	1449775	1065019	65779	7108	0	0	7580	0	4287	0	0	0	0	0	167216	144323	155525	159735
Mannose	lvl 1	7.913	179.055	MS & library MS/MS match & retention time match	[M-H]-	HILIC-	Food Cluster 2	Carbohydrates and carbohydrate conjugates	WQZGKKKJIJFFOK-QTVWNMPRSA-N	C([C@@H]1[C@H]([C@@H]([C@@H](C(O1)O)O)O)O)O	179.05467:49241300 180.05802:3199435 181.06138:90483696	51.15107:9606 56.6963:11675 58.00433:13227 59.01229:1504147 64.14371:12455 64.29993:10745 67.01611:11368 71.01226:907641 72.99144:19780 78.74608:12285 81.81735:11987 83.01238:16864 85.02801:94744 89.02287:387265 89.02895:19691 95.01257:47186 101.02288:124035 113.0228:126014 119.03327:23091 132.07303:13244 157.55977:12294	4276479	841514	125395	3578433	11858089	1057686	644930	2854563	135360	399449	1457920	23394428	14489086	2652196	1152536	604810	620423	721826	69473	274467	3220040	4535450	4872989	5224039
N-Methylleucine	lvl 1	6.528	146.118	MS & library MS/MS match & retention time match	[M+H]+	HILIC+	Food Cluster 2	Amino acids, peptides, and analogues	XJODGRWDFZVTKW-UHFFFAOYSA-N	CC(C)CC(C(=O)O)NC	146.11794:1006301 147.12129:63233 148.12465:0	69.0701:2972 77.39446:1979 81.384:1762 94.12142:1946 100.1123:90236 104.84347:1743 111.30766:2124 121.96755:2233 132.41238:2077 146.11935:6332	0	0	11973	177708	369955	196667	264434	25439	4465	0	4606	53424	54952	12834	4726	6142	0	0	0	0	76326	63316	67937	47758
Proline-hydroxyproline	lvl 1	8.666	229.119	MS & library MS/MS match & retention time match	[M+H]+	HILIC+	Food Cluster 2	Amino acids, peptides, and analogues	ONPXCLZMBSJLSP-CSMHCCOUSA-N	C1C[C@H]([NH2+]C1)C(=O)N2C[C@@H](C[C@H]2C(=O)[O-])O	229.11888:1563487 230.12223:205722 231.12559:9100086	55.2724:2171 56.23817:1880 57.50436:2035 61.51314:1837 63.98256:2124 70.06535:452321 72.08089:8510 74.87498:2140 79.00602:2029 84.04472:2412 86.06031:3685 86.09636:3470 116.07076:3912 132.06583:114557 143.61295:2255 183.0956:2386 198.55211:2892 198.56947:4229 229.11922:241301	0	0	0	0	0	0	7465	6404	0	0	53876	334081	227104	23583	0	0	0	0	0	0	145635	162876	147173	196913
Threonic acid	lvl 1	9.672	135.028	MS & library MS/MS match & retention time match	[M-H]-	HILIC-	Food Cluster 2	Carbohydrates and carbohydrate conjugates	JPIJQSOTBSSVTP-GBXIJSLDSA-N	C([C@H]([C@@H](C(=O)O)O)O)O	135.02834:4070132 136.03169:187854 137.03505:45652	58.32767:2191 59.01223:20219 71.01223:5042 72.99153:21927 73.02483:9636 75.00719:224261 89.02283:8199 91.05766:111222 96.5639:2217 116.00824:7917 116.03065:3203 117.01478:17670 134.86369:8918 135.02837:60812 135.04703:32495	101126	44333	64231	9297188	1074208	5549244	7449264	4070132	1441994	808778	1414057	1154989	809633	735007	754923	1022417	202600	135218	71895	96793	1282985	2071094	1274036	1137828
Verbascose	lvl 1	10.289	827.266	MS & library MS/MS match & retention time match	[M-H]-	HILIC-	Food Cluster 2	Carbohydrates and carbohydrate conjugates	FLUADVWHMHPUCG-SWPIJASHSA-N	C([C@@H]1[C@@H]([C@@H]([C@H]([C@H](O1)OC[C@@H]2[C@@H]([C@@H]([C@H]([C@H](O2)OC[C@@H]3[C@@H]([C@@H]([C@H]([C@H](O3)OC[C@@H]4[C@H]([C@@H]([C@H]([C@H](O4)O[C@]5([C@H]([C@@H]([C@H](O5)CO)O)O)CO)O)O)O)O)O)O)O)O)O)O)O)O)O	827.2663:261996 828.26965:106657 829.27301:26257	59.01231:33276 68.17551:3587 70.74049:3587 71.01234:46924 73.02793:72967 83.01244:13670 85.02791:3700 86.5353:3330 87.00731:6310 88.68826:3617 89.0228:46930 97.02763:35979 101.0228:130762 109.45707:3595 109.46566:4345 113.0228:31197 114.85395:3111 115.0387:6197 119.03365:20257 125.02296:8350 143.03299:24688 161.04404:211891 179.05441:85731 208.19603:3413 221.06529:64217 263.07648:14220 281.08762:…	1673	429	0	5652	48027	0	0	2789	870	649	2634	315737	113474	40325	0	0	0	0	0	0	29451	37218	36472	50758
DAG 34:1	lvl 1	7.028	612.559	MS & library MS/MS match & retention time match	[M+NH4]+	CSH+	Food Cluster 3	Diacylglycerols	YEJYLHKQOBOSCP-OZKTZCCCSA-N	CCCCCCCCCCCCCCCC(=O)OC[C@H](CO)OC(=O)CCCCCCC/C=C\CCCCCCCC	612.55823:7536780 613.56158:2779738 614.56494:663467	71.08583:94799 79.05467:11526 81.07007:106064 83.08577:110981 85.0648:9009 85.10141:81946 93.06992:28116 95.08575:152989 97.06544:7273 97.10134:87400 107.08574:25382 109.10144:91207 111.11732:29187 115.70632:5771 121.10143:33538 123.11713:34545 125.13274:7936 135.11711:46586 137.13223:10661 149.1326:13571 152.78851:6099 239.23755:36488 247.24249:25230 250.10109:6337 257.24756:23100 265.25372:3704…	0	5954	0	0	10231	0	0	352539936	2905492	847360	2256699	0	0	30716960	828142	9241	128590	17409	157659	224473	7062564	8187581	10058456	10586152
DAG 38:5	lvl 1	6.398	660.559	MS & library MS/MS match & retention time match	[M+NH4]+	CSH+	Food Cluster 3	Diacylglycerols	GRGDLDNREYVILP-CNWVQWJYSA-N	CCCCC/C=C\C/C=C\CCCCCCCCCC(=O)O[C@@H](CO)COC(=O)CCCCCCC/C=C\C/C=C\C/C=C\CC	660.55878:2865336 661.56213:1449516 662.56549:379495	71.08562:15989 74.81161:2699 79.05445:21935 81.07015:47840 83.08587:36796 85.06502:5536 85.10126:7284 88.11241:72751 91.05445:22872 93.07028:31591 95.08583:57847 95.90285:2908 97.0655:4050 97.1016:33123 105.07029:27664 107.08612:25154 109.10146:27896 111.08065:4551 111.1173:5618 117.07014:11812 119.08591:30509 121.10184:42808 123.11729:6994 129.05531:3914 131.08601:15668 133.10115:18912 135.11714…	0	0	0	0	18945	0	0	5704779	705368	655324	1123145	0	0	644216	209803	0	29824	8628	7418	0	369385	506507	524877	578395
DG 35:3	lvl 1	6.225	627.499	MS & library MS/MS match & retention time match	[M+Na]+	CSH+	Food Cluster 3	Diacylglycerols	IKJJVJOIPHETGJ-BYBPBHJYNA-N	CCCCCCCCC(=O)OCC(CO)OC(=O)CCCCCCCCCC\C=C/C\C=C/C\C=C/CCCCCCC	627.4986:3687048 628.50195:1486894 629.50531:300394	93.91749:2763 182.61499:3538 202.53783:3511 219.92175:2697 240.11003:3014 325.27689:12959 337.27567:10310 347.25772:3553 359.25595:3854 494.37082:3396 627.49817:838519	0	0	0	0	0	0	0	3687048	123891	10874	85015	0	0	1013011	34595	0	0	0	0	0	188546	268708	283899	298323
2-Ketogluconic acid	lvl 1	8.719	193.034	MS & library MS/MS match & retention time match	[M-H]-	HILIC-	Food Cluster 4	Carbohydrates and carbohydrate conjugates	VBUYCZFBVCCYFD-JJYYJPOSSA-N	C([C@H]([C@H]([C@@H](C(=O)C(=O)O)O)O)O)O	193.034:797545 194.03735:60931 195.04071:55311	57.03311:3496 58.6823:2146 59.01231:64620 66.13151:1836 70.36294:1928 71.01231:35378 72.99158:72873 73.02786:28694 80.32747:2171 83.01251:2404 85.02794:34246 89.023:9364 93.69183:1958 95.01247:4871 99.00694:3561 101.02274:28141 103.00195:14811 111.14128:1936 113.0228:64362 121.21042:2156 129.01868:2380 131.03355:9466 157.01379:3650 179.75272:2375 193.03386:11220	44579	30709	170204	288069	171465	338772	376017	269855	189477	175069	314927	350874	412897	276082	227371	208252	785180	797545	186429	251206	277868	379602	443693	468137
Acetylcarnitine	lvl 1	7.272	204.124	MS & library MS/MS match & retention time match	[M+H]+	HILIC+	Food Cluster 4	Fatty acid esters	RDHQFKQIGNGIED-MRVPVSSYSA-O	CC(=O)O[C@H](CC(=O)O)C[N+](C)(C)C	204.12358:32967528 205.12693:3932661 206.13029:718294	50.72665:24211 60.0811:1304213 63.52831:21750 65.53721:20295 85.02857:6492366 98.06063:21383 126.05525:43859 128.18224:21644 131.94379:22916 138.05565:50122 144.06561:93289 144.10231:251616 145.0392:31628 145.0498:1370414 204.12361:4536667	2813593	4599355	17153528	9480126	4916461	2162428	3055522	18192176	4853195	7346076	15919717	28960642	17628038	9772665	7946189	8988967	138149712	83777168	5389560	7646569	18192288	18816250	18130720	19306692
Betaine or valine	lvl 1	7.296	118.086	MS & library MS/MS match & retention time match	[M+H]+	HILIC+	Food Cluster 4	Amino acids, peptides, and analogues	KWIUHFFTVRNATP-UHFFFAOYSA-N	C[N+](C)(C)CC(=O)[O-]	118.08638:101167216 119.08973:7462456 120.09309:707476	53.03896:26882 58.06547:1734100 59.07327:2392030 68.41777:15837 85.2999:16040 86.06671:15661 86.13789:16465 95.04935:140005 105.04477:19342 118.06683:397882 118.08643:14318213	11297146	14306320	38651272	26476410	34162016	16286850	16915876	149222896	38638304	34960444	55339452	495756896	229993152	75843920	50439492	35651944	69190992	30981796	25579784	29975798	98505696	101896504	97670624	102729216
Carnitine	lvl 1	7.844	162.113	MS & library MS/MS match & retention time match	[M+H]+	HILIC+	Food Cluster 4	Quaternary ammonium salts	PHIQHXFUZVPYII-ZCFIWIBFSA-N	C[N+](C)(C)C[C@@H](CC(=O)[O-])O	162.11292:5065593 163.11627:482130 164.11963:914762	55.05463:132038 55.05758:5208 56.0501:3087 60.04482:13407 60.08113:140431 69.03364:6542 69.36306:3581 70.06546:5054 71.04942:7209 72.04449:43844 73.06497:168872 74.06023:6987 84.04475:22432 84.08093:103720 85.0286:45389 87.04416:5382 90.05521:248555 96.04454:5824 97.02876:30047 98.06005:22553 102.05564:11782 102.09161:618894 102.35266:2932 103.03925:173467 114.05526:22700 115.03915:4927 115.087:3…	2347096	3690600	16898534	5531492	3088534	1742846	2120761	8012700	1119082	2047612	3984976	10579656	9233979	4198536	1420592	1514703	54424816	37612044	1846300	1673138	8588107	8881813	8561356	8981649
Creatine	lvl 1	8.202	132.077	MS & library MS/MS match & retention time match	[M+H]+	HILIC+	Food Cluster 4	Amino acids, peptides, and analogues	CVSVTCORWBXHQV-UHFFFAOYSA-N	CN(CC(=O)O)C(=N)N	132.07709:175099200 133.08044:11352151 134.0838:863511	53.48849:109538 56.90341:112207 86.07156:125007 87.05538:503844 90.05519:13631098 114.06622:141368 115.05048:101684 132.0771:8082818	8314219	14868584	75190104	56054392	36144076	17431838	26171452	105686744	52131316	34071960	71716304	225766192	175099200	59194940	64199928	48094724	121536584	55467492	24843478	53937484	72979640	73604192	76171136	78663184
Isoxanthopterin	lvl 1	6.651	178.036	MS & library MS/MS match & retention time match	[M-H]-	HILIC-	Food Cluster 4	Pterins and derivatives	GLKCOBIIZKYKFN-UHFFFAOYSA-N	C1=NC2=C(NC1=O)NC(=NC2=O)N	178.03557:292200 179.03892:27245 180.04228:13547	70.0742:2171 74.04823:2258 133.01318:2627 135.0293:11811 136.01352:68480 161.00905:28985 177.90179:14030 178.03525:186378 178.04955:17013 178.08469:9711	0	0	13289	8052	1946	5321	3663	13358	13874	18062	17255	16178	16066	12486	11682	14436	24036	23662	12408	36005	20902	22363	20613	19503
Propionylcarnitine	lvl 1	6.501	218.139	MS & library MS/MS match & retention time match	[M+H]+	HILIC+	Food Cluster 4	Fatty acid esters	UFAHZIUFPNSHSL-UHFFFAOYSA-N	CCC(=O)OC(CC(=O)[O-])C[N+](C)(C)C	218.13907:1355794 219.14242:136866 220.14578:0	57.07028:3624 58.34497:1893 60.08112:80655 73.22508:2123 75.48925:2284 85.02858:509108 95.04933:4812 96.05302:2741 98.24949:2140 124.52081:2112 134.04489:2351 144.0004:4778 144.10243:14603 144.99997:4964 159.0656:100857 161.02721:2479 162.02644:4129 166.21234:2229 201.46388:3128 218.13911:292130	357530	569895	1552190	673605	494113	151231	264711	1164477	62040	128835	543494	2079182	1474836	534664	119323	137905	12028132	7853856	223748	305736	1402548	1324401	1388270	1362537
TMAO	lvl 1	5.702	76.0759	MS & library MS/MS match & retention time match	[M+H]+	HILIC+	Food Cluster 4	Aminoxides	UYPYRKYUKCHHIB-UHFFFAOYSA-N	C[N+](C)(C)[O-]	76.07585:5502726 77.0792:174217 78.08256:0	56.0498:2195 58.0655:1612713 58.99538:12512 59.0733:1720572 70.25732:2427 76.02172:2811 76.07586:837625	84921	198900	2308335	3589998	1486690	1983349	2472104	3543611	2104748	4228559	4383372	5502726	5353218	2555923	3625719	5562824	7599058	7270990	2479100	3542162	4020032	4022023	4440230	4292828
Arbutin	lvl 1	5.001	317.086	MS & library MS/MS match & retention time match	[M+HCO2]-	HILIC-	Food Cluster 5	Carbohydrates and carbohydrate conjugates	BJRNKVDFDLYUGJ-RMPHRYRLSA-N	C1=CC(=CC=C1O)O[C@H]2[C@@H]([C@H]([C@@H]([C@H](O2)CO)O)O)O	317.08652:2045309 318.08987:260213 319.09323:44749	70.76918:2186 71.01217:19897 73.02793:10122 85.028:4328 99.00745:2862 101.02264:16349 108.01999:87730 108.02791:3031 109.02779:40440 113.02284:15542 143.03386:2491 151.03897:13168 159.02824:4286 161.0439:47770 163.03838:4223 271.08099:28972 297.08017:2763	26574	11158	0	1841444	3036522	350181	125310	25226	997	0	0	5642	8955	4127	0	0	0	0	0	0	193220	219624	231299	267653
Dehydroascorbic acid	lvl 1	4.66	173.008	MS & library MS/MS match & retention time match	[M-H]-	HILIC-	Food Cluster 5	Gamma butyrolactones	SBJKKFFYIZUCET-JLAZNSOCSA-N	C([C@@H]([C@@H]1C(=O)C(=O)C(=O)O1)O)O	173.00755:32030192 174.0109:2300640 175.01426:1865543	53.00184:37136 55.01728:204987 57.03312:117047 59.01214:174077 68.997:25350 71.0122:2786157 72.99158:34239 73.02789:77964 83.01215:199108 83.15443:21862 85.02796:50342 87.00728:47724 91.4262:23056 99.0071:1337131 110.19275:23699 111.00742:79875 112.98637:1522101 115.00242:98248 119.45526:20733 124.98626:527081 129.01755:83693 140.9821:22033 142.99692:2738127 173.00754:582045	1708788	979553	10003	11402739	32030192	16715229	18888074	190262	5893	16009	13840	30739	4086	14050	6589	13265	34571	271232	22162	19935	3513920	4476892	4506014	4667552
gamma-aminobutyric acid	lvl 1	7.839	104.071	MS & library MS/MS match & retention time match	[M+H]+	HILIC+	Food Cluster 5	Amino acids, peptides, and analogues	BTCSSZJGUNDROE-UHFFFAOYSA-N	C(CC(=O)O)CN	104.0708:147555504 105.07415:7500998 106.07751:240930	53.30549:75457 68.04973:417954 69.03373:4518151 86.06026:4491788 87.0443:16001268 97.2874:81375 104.07096:953411	196592	124673	128731	232353	483243	131015	89239	153792	60120	99280	84159	201776	140619	96297	62851	35853	70648	86911	61171	70815	237031	238572	195644	236791
Imidazole	lvl 1	4.703	69.0449	MS & library MS/MS match & retention time match	[M+H]+	HILIC+	Food Cluster 5	Imidazoles	RAXXELZNTBOGNW-UHFFFAOYSA-N	C1=CN=CN1	69.04493:2614889 70.04828:45849 71.05164:0	51.38048:2409 69.04488:3496318	23665340	19789028	1382208	2616682	10070067	6596620	4768482	6316708	3805988	1446865	1611470	3471517	3879593	3026204	2498325	2443014	1727568	3847629	2803245	3381788	4430770	4572520	4499652	4684624
Lactitol	lvl 1	8.99	343.123	MS & library MS/MS match & retention time match	[M-H]-	HILIC-	Food Cluster 5	Fatty acyl glycosides	VQHSOMBJVWLPSR-JVCRWLNRSA-N	C([C@@H]1[C@@H]([C@@H]([C@H]([C@@H](O1)O[C@H]([C@@H](CO)O)[C@@H]([C@H](CO)O)O)O)O)O)O	343.12341:464544 344.12676:67498 345.13012:6641	52.73071:2212 58.22114:2036 59.01229:77191 67.33797:2250 71.01226:54982 85.02751:2633 88.29249:2495 89.02285:75533 89.02899:4445 101.0228:40571 113.0229:23974 119.03329:33188 131.03348:3053 143.03328:3898 161.04308:2424 163.05988:3261 179.05499:20312 181.07043:29590 289.26419:2664 297.00241:2598 343.12369:29028	80056	45615	1259	506782	868939	1206758	1238868	546414	16721	979	6807	12743	31105	23762	8004	4337	35876	406	5736	13448	187792	245725	251936	305366
Mannitol	lvl 1	7.917	181.07	MS & library MS/MS match & retention time match	[M-H]-	HILIC-	Food Cluster 5	Carbohydrates and carbohydrate conjugates	FBPFZTCFMRRESA-KVTDHHQDSA-N	C([C@H]([C@H]([C@@H]([C@@H](CO)O)O)O)O)O	181.07022:62506728 182.07357:4072462 183.07693:772454	59.01227:424566 67.17487:9729 71.01225:435652 73.0278:171243 73.29527:9051 78.17403:9066 83.01234:10723 85.02795:73889 87.00687:10995 89.0228:291522 97.02798:18792 98.08549:10607 101.02284:437958 112.98383:72576 113.02276:56704 115.03814:20349 119.03329:42884 131.03325:13307 163.05963:63809 181.07031:788432	7719477	1691370	300974	78514384	236339184	92322000	80505616	2619461	639177	518529	953272	894390	1536662	1439195	646062	536650	128977	189083	116988	106810	14743441	20405480	22792184	26638474
Nicotinamide	lvl 1	1.788	123.055	MS & library MS/MS match & retention time match	[M+H]+	HILIC+	Food Cluster 5	Pyridinecarboxylic acids and derivatives	DFPAKSUCGFBDDF-UHFFFAOYSA-N	C1=CC(=CN=C1)C(=O)N	123.05546:5463521 124.05881:506572 125.06217:129811	52.77056:2033 60.30186:2050 80.04957:251586 80.05784:8841 80.47324:2027 84.49018:2530 96.03815:4040 96.0445:72182 106.02901:20721 122.09168:2329 123.05547:2002631 123.10007:513792	7629627	6079714	4412101	6192562	3658349	2513604	2897362	10633136	6222415	8632311	3169632	2705672	2617553	1141934	2280118	2222629	1158106	729740	915538	2062314	4539096	3975755	4000162	3930596
4-Hydroxyphenyllactic acid	lvl 1	4.423	181.049	MS & library MS/MS match & retention time match	[M-H]-	HILIC-	Food Cluster 6		JVGVDSSUAVXRDY-UHFFFAOYSA-N	C1=CC(=CC=C1CC(C(=O)O)O)O	181.04915:285271 182.0525:43785 183.05586:3281	56.36996:1796 62.80546:1999 72.99147:13691 77.63195:2164 92.53928:1912 108.42542:2271 119.0486:25404 122.79813:1909 135.04335:46936 161.02141:2742 163.03842:67805 181.04904:49079	8738	12741	21517	51832	71067	40811	60865	113761	57031	43122	97377	171188	301868	144303	88159	74536	934495	2245666	150984	204361	132144	185125	164386	159173
N-Acetylhistamine	lvl 1	6.161	154.098	MS & library MS/MS match & retention time match	[M+H]+	HILIC+	Food Cluster 6	Carboxylic acid derivatives	XJWPISBUKWZALE-UHFFFAOYSA-N	CC(=O)NCCC1=CN=CN1	154.0979:178031 155.10125:0 156.10461:37039	52.67764:2062 59.50701:1710 65.56534:2145 95.0606:56489 95.06713:2506 97.06591:2768 109.07621:1944 112.0872:16210 112.3565:2222 136.08711:16252 136.74318:1957 154.08636:5355 154.09824:33122 154.12212:5834 154.24008:2045	0	0	0	0	0	0	0	9307	0	0	18489	56057	80418	105801	45273	39209	152717	191143	0	178031	0	11484	10258	12747
N-Acetylhistidine	lvl 1	8.234	196.071	MS & library MS/MS match & retention time match	[M-H]-	HILIC-	Food Cluster 6	Amino acids, peptides, and analogues	KBOJOGQFRVVWBH-ZETCQYMHSA-N	CC(=O)N[C@@H](CC1=CN=CN1)C(=O)O	196.07146:170304 197.07481:11821 198.07817:0	52.12473:1829 57.34725:1977 58.02815:2044 59.01237:4209 59.79244:1999 60.85764:1961 66.96886:2228 75.53815:1902 79.45934:1918 80.7448:1604 83.37033:2082 95.54697:1975 110.07076:52502 134.0705:4838 152.82381:2046 154.06068:41281 181.00063:4860 195.9048:11221 196.07265:30188 196.14496:4790	25405	16146	83394	64359	34847	23151	42723	90777	147061	116040	157469	156519	225646	174753	145933	161911	372646	437661	76794	129492	114606	155413	146987	162394
N-Acetylmannosamine	lvl 1	7.147	220.081	MS & library MS/MS match & retention time match	[M-H]-	HILIC-	Food Cluster 6	Carbohydrates and carbohydrate conjugates	OVRNDRQMDRJTHS-ZTVVOAFPSA-N	CC(=O)N[C@H]1[C@H]([C@@H]([C@H](OC1O)CO)O)O	220.08139:238474 221.08474:26373 222.0881:1695	51.3294:1872 51.57491:1862 59.01229:41463 61.50951:1899 63.99602:2158 71.01231:3914 89.02289:2793 100.03862:18750 101.02291:4433 109.70528:2185 141.1599:1862	683	1232	2397	4172	7057	753	761	9815	8861	8359	22594	22185	27811	12636	9641	12948	238474	160678	8465	16109	21060	31532	31104	36127
N-Cinnamoylglycine	lvl 1	2.967	204.065	MS & library MS/MS match & retention time match	[M-H]-	HILIC-	Food Cluster 6	Amino acids, peptides, and analogues	YAADMLWHGMUGQL-VOTSOKGWSA-N	C1=CC=C(C=C1)/C=C/C(=O)NCC(=O)O	204.06519:277033 205.06854:49574 206.0719:36156	59.01211:2454 66.87391:2137 78.61401:1839 79.13673:1770 83.01214:2348 130.06456:9414 158.06041:2368 160.07533:31877 162.05467:8103 204.06511:57904	0	0	69261	79113	22239	24577	28770	140865	104798	224509	277033	229646	311169	197320	169531	178094	536406	316017	61458	111233	97219	133621	141146	140790
Trehalose-6-Phosphate	lvl 1	10.143	421.074	MS & library MS/MS match & retention time match	[M-H]-	HILIC-	Food Cluster 6	Carbohydrates and carbohydrate conjugates	LABSPYBHMPDTEL-LIZSDCNHSA-N	C([C@@H]1[C@H]([C@@H]([C@H]([C@H](O1)O[C@@H]2[C@@H]([C@H]([C@@H]([C@H](O2)COP(=O)(O)O)O)O)O)O)O)O)O	421.0741:449292 422.07745:62096 423.08081:13517	53.98725:2288 54.66167:2313 73.68342:2532 74.10881:2467 78.95747:151767 90.56042:2057 96.96775:25846 102.24448:2474 138.97882:8990 178.08191:2450 182.9115:2225 198.72423:10048 241.01054:41600 248.83578:2237 336.8974:2426 421.07407:141932	0	0	0	0	0	779	670	1123	996	0	0	2401	0	0	0	1344	62241	14908	741	0	2164	2535	3757	3790
Cadaverine	lvl 1	9.203	103.123	MS & library MS/MS match & retention time match	[M+H]+	HILIC+	Food Cluster 8	Amines	VHRGRCVQAFMJIZ-UHFFFAOYSA-N	C(CCN)CCN	103.12315:760155 104.1265:69391 105.12986:0	51.7316:1826 55.52039:1934 65.36405:1762 69.06991:10112 86.09659:136168 94.12861:1749 103.13165:8792	473544	537203	130683	140761	137576	177489	191306	170688	88830	92601	281874	362932	350676	283661	182502	310580	6329152	5314842	862574	1645292	745861	757657	701206	692874
Histamine	lvl 1	8.393	112.087	MS & library MS/MS match & retention time match	[M+H]+	HILIC+	Food Cluster 8	Amines	NTYJJOPFIAHURM-UHFFFAOYSA-N	C1=C(NC=N1)CCN	112.08717:964956 113.09052:38028 114.09388:876232	51.86777:1649 68.04964:7588 70.06537:10199 71.06873:14940 83.06057:22238 88.9174:2242 95.06062:245749 112.05044:13610 112.0873:82247 112.09549:84005	490872	566419	247356	533466	436389	347456	496340	468645	257433	228166	598454	945508	1101552	953619	841901	2054824	4047290	4447718	1151465	3388531	964956	996422	976140	1033651
3-Indoleacetic acid	lvl 1	1.233	176.071	MS & library MS/MS match & retention time match	[M+H]+	HILIC+	Food Cluster 9	Indolyl carboxylic acids and derivatives	SEOVTRFCIGRIMH-UHFFFAOYSA-N	C1=CC=C2C(=C1)C(=CN2)CC(=O)O	176.07097:1141695 177.07432:156578 178.07768:396783	58.69165:2032 70.0756:2146 108.04459:51168 120.08097:3774 126.05521:52556 133.05243:3022 133.31697:2197 134.06035:4963 146.06007:10375 148.03912:3351 148.07585:62217 158.06038:35256 176.07092:1032939 176.10616:43834	321242	87057	0	4467	0	0	0	7125	0	0	0	5240	7074	0	7389	0	0	0	0	0	8629	5624	10689	8618
5,6-Dihydrouracil	lvl 1	1.796	115.05	MS & library MS/MS match & retention time match	[M+H]+	HILIC+	Food Cluster 9	Pyrimidines and pyrimidine derivatives	OIVLITBTBDPEFK-UHFFFAOYSA-N	C1CNC(=O)NC1=O	115.05047:2527983 116.05382:128530 117.05718:0	55.01824:123115 61.0399:13236 61.51871:1792 66.0909:1872 72.04457:300012 72.08105:7696 82.32654:2114 98.05991:3026 115.05049:232523 115.09492:3646	47303	25650	14346	8722	5783	15021	16436	79156	32628	14619	21351	24468	43902	17660	13546	30392	16846	9074	15779	5460	19722	21816	26006	31617
Caffeine	lvl 1	1.278	195.088	MS & library MS/MS match & retention time match	[M+H]+	HILIC+	Food Cluster 9	Purines and purine derivatives	RYYVLZVUVIJVGH-UHFFFAOYSA-N	CN1C=NC2=C1C(=O)N(C(=O)N2C)C	195.08804:18315352 196.09139:2516097 197.09475:34063	69.04501:6438 69.32439:3374 83.06087:4435 89.05981:171031 107.07034:4346 110.07144:65451 133.0862:37774 138.06641:1405215 139.64558:3789 151.09801:29230 156.07666:5207 180.06511:14000 181.07202:7215 195.08797:6892277 195.15669:182522	21745584	12382503	9132746	10836394	7130904	7259092	7070544	20944828	8854890	11686517	12005744	15999651	18407776	14235761	14949340	15754356	10343371	9807298	7158774	8019270	11047428	12050556	11795355	12449400
3-Phenyllactic acid	lvl 1	2.151	165.054	MS & library MS/MS match & retention time match	[M-H]-	HILIC-	Mixed Cluster 1		VOXXWSYKYCBWHO-UHFFFAOYSA-N	C1=CC=C(C=C1)CC(C(=O)O)O	165.05406:871442 166.05741:88085 167.06077:2991	58.6338:2080 60.25368:1682 61.75144:1785 63.80751:1972 65.65688:2406 72.98708:2648 72.99145:44806 76.5601:1990 119.0485:49361 121.02769:31366 145.6136:2017 147.04349:239504 164.83649:10678 165.05394:99364 165.06921:4357	4390	4969	13929	48888	51065	60328	77128	60902	12327	10753	18637	30451	32789	28053	23164	10160	871442	103598	10552	20271	46539	57561	54176	53209
gamma-Glutamylleucine	lvl 1	8.171	261.145	MS & library MS/MS match & retention time match	[M+H]+	HILIC+	Mixed Cluster 1	Amino acids, peptides, and analogues	MYFMARDICOWMQP-YUMQZZPRSA-N	CC(C)C[C@@H](C(=O)O)NC(=O)CC[C@@H](C(=O)O)N	261.14536:1162287 262.14871:179312 263.15207:136044	62.77296:2514 69.03376:2436 69.07005:9784 84.04465:42731 86.09663:404716 102.05492:3593 130.05023:27899 132.09077:3897 132.1022:110925 142.05043:3832 147.07646:3505 148.04875:3477 148.06082:56894 155.04391:2170 159.88161:2665 169.08543:3103 198.11276:26979 201.80852:2861 215.13928:29588 243.13263:3692 244.11852:21686 261.14514:229830	47525	46375	327276	444455	65526	207813	935066	425362	209664	60949	225301	2691365	190983	200072	37679	64921	458287	218986	63032	222844	398309	428466	431557	449882
LPE 16:0	lvl 1	1.432	452.276	MS & library MS/MS match & retention time match	[M-H]-	CSH-	Mixed Cluster 1	Glycerophosphoethanolamines	CKPBBEOJHAPPBT-HXUWFJFHSA-N	CCCCCCCCCCCCCCCC(=O)O[C@H](CO)COP(=O)(O)OCCN	452.27655:1478330 453.2799:396069 454.28326:95249	78.95746:12742 119.39545:2336 140.00998:17020 154.94577:29292 155.94542:15456 172.95618:36704 173.95549:22763 196.03673:38068 201.11125:3058 214.04723:3338 255.23175:439359 278.21838:4128 452.27625:88669 452.43225:2595	5810	0	7558600	4320898	10270304	2986369	5663980	9768105	1492989	6758936	3078882	6970706	6252580	1626545	1137837	1251977	3980930	856554	284074	640659	5244140	5307211	6259198	6811062
Phenylacetaldehyde	lvl 1	5.758	121.065	MS & library MS/MS match & retention time match	[M+H]+	HILIC+	Mixed Cluster 1	Phenylacetaldehydes	DTUQWGWMVIHBKE-UHFFFAOYSA-N	C1=CC=C(C=C1)CC=O	121.06509:30795624 122.06844:3319443 123.0718:261456	51.03666:11340 53.03909:147625 55.01817:20081 63.92751:11217 65.49769:11557 77.03865:54915 79.05424:19467 86.43056:12301 91.05444:1171845 93.07014:1726984 95.04938:746743 101.5049:15902 103.05447:1747404 105.04505:222806 117.4123:12908 121.06509:4406222	3735	0	0	17265	70627	29243	11106	9419	0	0	5301	12657	12901	12160	0	6179	85668	72797	0	4398	85585	96119	99910	106268
Guanine	lvl 1	6.647	152.057	MS & library MS/MS match & retention time match	[M+H]+	HILIC+	Mixed Cluster 3	Purines and purine derivatives	UYTPUPDQBNUYGX-UHFFFAOYSA-N	C1=NC2=C(N1)C(=O)N=C(N2)N	152.05714:1882155 153.06049:194025 154.06385:0	94.41673:1977 110.0352:9638 122.92235:2000 128.04599:7515 130.01547:1926 135.03032:9285 152.05716:625093	1478464	1882155	6574	86004	1516622	96832	353343	1022636	1136948	672255	371205	2371083	1866518	527705	1841534	900916	110200	59033	26309	1714774	1501844	1450804	1384684	1499292
Nicotinic acid	lvl 1	4.181	124.04	MS & library MS/MS match & retention time match	[M+H]+	HILIC+	Mixed Cluster 3	Pyridinecarboxylic acids and derivatives	PVNIIMVLHYAWGP-UHFFFAOYSA-N	C1=CC(=CN=C1)C(=O)O	124.03959:600576 125.04294:21142 126.0463:0	80.04952:12648 83.06055:7991 96.04456:12499 107.06013:2186 124.03959:292537 124.07596:9177 124.08701:93747 124.10284:17594	956929	297854	91349	477804	652926	93165	149676	1814321	124645	215893	250573	587209	456526	195350	161482	199508	299766	75117	97659	1129431	440137	428437	452066	445557
Cysteic Acid	lvl 1	9.145	167.996	MS & library MS/MS match & retention time match	[M-H]-	HILIC-	Mixed Cluster 4	Amino acids, peptides, and analogues	XVOYSCVBGLVSOL-REOHCLBHSA-N	C([C@@H](C(=O)O)N)S(=O)(=O)O	167.99567:248258 168.99902:12093 170.00238:26400	65.42711:1701 71.01212:27574 71.01593:2209 80.96347:55462 80.96851:2641 86.0233:13784 150.96919:35584 167.99562:75319 168.0294:4071	248258	26184	273562	11926	1943	8060	5975	17817	69608	48596	51407	11878	28344	41364	56346	54943	6381	4949	14789	38360	34707	48317	45307	61958
LPE 20:4	lvl 1	1.151	500.276	MS & library MS/MS match & retention time match	[M-H]-	CSH-	Mixed Cluster 4	Glycerophosphoethanolamines	JPNPIRVRGLGTRE-YSKCIPFOSA-N	CC/C=C\C/C=C\C/C=C\C/C=C\CCCCCCC(=O)OC[C@H](COP(=O)(O)OCCN)O	500.27637:729446 501.27972:208443 502.28308:0	78.95747:13245 140.01018:10119 152.99295:2707 157.22734:2349 166.84778:2439 196.03639:28795 214.04755:5032 259.24222:9705 303.2316:133448 500.2774:47629	24639	0	856330	0	0	0	0	6594	0	107804	0	0	0	0	0	0	0	0	0	0	43211	97907	68456	69450
Cyclohexanamine	lvl 1	5.229	100.112	MS & library MS/MS match & retention time match	[M+H]+	HILIC+	Mixed Cluster 5	Cyclohexylamines	PAFZNILMFXTMIY-UHFFFAOYSA-N	C1CCC(CC1)N	100.11221:488135 101.11556:0 102.11892:2423638	50.16517:5676 55.05465:34018 55.3793:4570 56.04984:12139 58.02908:335159 58.0654:78129 69.03362:196528 69.03753:8285 70.06527:11112 71.04929:11439 72.08081:6533 79.34254:3903 82.06527:55540 83.08559:75162 98.06009:54874 100.07584:5733312	440851	432769	222455	201552	313480	406347	692677	253229	260145	756074	193254	293335	513493	354843	487767	379463	390797	254721	707591	1195567	486800	452189	447446	401517
3,4-Dihydroxyphenylalanine (DOPA)	lvl 1	8.394	198.074	MS & library MS/MS match & retention time match	[M+H]+	HILIC+	Peptide Cluster 1	Amino acids, peptides, and analogues	WTDRDQBEARUVNC-UHFFFAOYSA-N	C1=CC(=C(C=C1CC(C(=O)O)N)O)O	198.07417:348450 199.07752:0 200.08088:88053	55.05451:31421 57.07019:34118 67.0543:6380 69.07021:48903 71.08568:11302 81.06981:12908 83.08575:85005 85.10062:6919 88.41026:6056 95.08569:16474 97.06475:15705 97.10139:60110 100.07608:15144 107.08543:8038 111.0808:9105 114.09124:14526 121.10104:11692 180.0639:7328 198.1857:9860849	0	0	0	9583	0	0	0	0	0	0	5112	28952	81794	8936	6022	6547	0	0	0	0	8130	22567	15342	22380
Ala-Ile	lvl 1	7.814	203.14	MS & library MS/MS match & retention time match	[M+H]+	HILIC+	Peptide Cluster 1	Amino acids, peptides, and analogues	ZSOICJZJSRWNHX-ACZMJKKPSA-N	CC[C@H](C)[C@@H](C(=O)[O-])NC(=O)[C@H](C)[NH3+]	203.13956:815201 204.14291:38581 205.14627:0	68.64276:4997 73.85329:5044 86.09099:9076 86.09665:227359 103.59254:4539 132.10223:92520 151.03571:5577 154.47794:5260 157.13397:21644 203.05318:2193702 203.13921:19602 203.55453:4648	38008	107075	1078988	925338	247152	211392	646028	1095400	461870	738743	751398	2869349	1887598	605888	742597	780677	471220	291738	258379	384327	643466	661109	755682	671674
Alanine	lvl 1	8.216	90.0552	MS & library MS/MS match & retention time match	[M+H]+	HILIC+	Peptide Cluster 1	Amino acids, peptides, and analogues	QNAYBMKLOCPYGJ-REOHCLBHSA-N	C[C@@H](C(=O)O)N	90.05517:8273998 91.05852:348417 92.06188:0	60.0448:7287 72.04448:12536 72.08106:2454 76.21799:1745 90.05523:49691	310401	759536	7133106	6011802	2163483	1282033	3411890	5976714	3255290	4268018	4230496	20017402	12095277	3032572	3850656	4767548	3329383	1911812	1302750	3369161	5068883	5286726	5462795	5412606
Arginine	lvl 1	9.603	175.119	MS & library MS/MS match & retention time match	[M+H]+	HILIC+	Peptide Cluster 1	Amino acids, peptides, and analogues	ODKSFYDXXFIFQN-BYPYZUCNSA-N	C(C[C@@H](C(=O)O)N)CN=C(N)N	175.11955:1020974 176.1229:400713 177.12626:14957894	51.37954:2355 55.81208:2705 56.01098:2053 57.71948:1820 60.05601:147077 65.62907:2116 70.06537:154210 72.08102:9514 73.71839:1885 74.04852:2027 84.22598:1793 85.15072:1820 85.70975:2244 108.72394:2325 112.08749:15695 116.07098:131979 130.09784:44324 141.02641:1899 157.1093:9196 158.09279:51156 175.11951:251771	2199450	24109854	176653600	175052960	104575016	73291904	115882624	168342448	106945384	142744080	140622624	342844576	252247648	119976120	139295680	147338960	103280744	61800840	49228612	77761568	128935256	129914096	128717056	125095568
Asp-Glu	lvl 1	9.585	263.088	MS & library MS/MS match & retention time match	[M+H]+	HILIC+	Peptide Cluster 1	Amino acids, peptides, and analogues	CKAJHWFHHFSCDT-UHFFFAOYSA-N	C(CC(=O)O)C(C(=O)O)NC(=O)C(CC(=O)O)N	263.08826:892684 264.09161:100991 265.09497:0	70.02911:13989 73.22822:2130 81.57551:2368 84.04449:28946 88.03956:107783 94.08564:1962 102.05534:34543 130.05025:80378 134.04521:9129 136.03976:27013 139.05109:3627 148.06085:137787 157.06175:3269 164.03397:16794 167.04565:2749 181.06117:17820 182.04541:27476 185.05629:103006 199.0722:14142 199.59988:3579 199.61659:3551 200.05655:4794 203.06689:54780 210.03995:3592 217.08281:29634 227.06708:1676…	0	17161	52582	178109	97800	82742	173318	270462	128517	136587	54818	645807	467610	75258	196755	129848	892684	53125	16609	104442	167328	162669	161083	146550
Asp-phe	lvl 1	8.288	281.114	MS & library MS/MS match & retention time match	[M+H]+	HILIC+	Peptide Cluster 1	Amino acids, peptides, and analogues	YZQCXOFQZKCETR-UWVGGRQHSA-N	C1=CC=C(C=C1)C[C@@H](C(=O)O)NC(=O)[C@H](CC(=O)O)N	281.1138:260977 282.11715:30934 283.12051:0	50.11131:1860 51.84392:1940 54.74846:2176 70.02905:2250 88.03953:24351 91.05412:2459 120.08113:45797 130.06503:2108 131.05081:2376 140.42026:2382 166.08673:62433 168.76073:2043 175.08708:20687 200.07193:19382 208.93852:2050 217.09731:2859 221.09302:11967 235.10857:21019 245.00682:1915 246.07703:17547 246.11034:1922 247.60295:3393 253.82646:2412 263.10449:3879 281.11465:12258	0	88317	2200521	1384060	134221	119871	369827	920487	697802	758122	658815	2617054	1833097	485138	870053	688480	268377	283728	128383	328993	726477	776254	803417	740012
Carnosine	lvl 1	9.701	227.114	MS & library MS/MS match & retention time match	[M+H]+	HILIC+	Peptide Cluster 1	Hybrid peptides	CQOVPNPJLQNMDC-ZETCQYMHSA-N	C1=C(NC=N1)C[C@@H](C(=O)[O-])NC(=O)CC[NH3+]	227.11449:4563194 228.11784:564634 229.1212:0	55.70099:3875 58.03249:3418 60.18696:3211 66.49363:3591 83.06053:16035 84.08068:7404 90.94535:3086 93.04595:3307 95.0606:43373 98.79646:3755 110.07154:916300 112.08678:6242 113.62699:3597 122.07163:86693 136.08762:35463 138.0668:37455 140.37767:3549 148.08704:6461 152.08206:58120 156.07718:1369580 164.08226:136230 165.11392:19151 165.41219:3392 166.06161:61086 168.35472:3342 180.07729:81685 181.1…	7465	78832	4929934	5211662	349540	334842	1071788	4340096	1506693	2905625	3587545	11871979	7266296	3012556	3006438	5131000	1840362	597334	335543	992558	2841227	2938281	3050836	2868108
Gly-Ile	lvl 1	7.88	187.107	MS & library MS/MS match & retention time match	[M-H]-	HILIC-	Peptide Cluster 1	Amino acids, peptides, and analogues	KGVHCTWYMPWEGN-UHFFFAOYSA-N	CCC(C)C(C(=O)O)NC(=O)CN	187.10744:348520 188.11079:19043 189.11415:0	73.03906:10712 74.02316:4735 87.0555:1901 88.03902:2568 116.07057:3763 130.08578:25771 135.06371:1960 143.11751:45261 182.26703:1976 187.10757:77683 187.12579:4091	8074	22717	349208	338077	70406	63642	169354	348520	202316	234125	218287	573997	537813	153977	224498	246779	119872	92657	60422	160287	211776	289634	309152	330922
Gly-val	lvl 1	8.073	175.108	MS & library MS/MS match & retention time match	[M+H]+	HILIC+	Peptide Cluster 1	Amino acids, peptides, and analogues	STKYPAFSDFAEPH-UHFFFAOYSA-N	CC(C)C(C(=O)O)NC(=O)CN	175.1082:4959110 176.11155:420628 177.11491:25007	53.01801:2774 53.63698:2055 55.05482:16014 58.66145:2317 60.89383:2411 68.66312:2273 72.08099:992280 89.30909:2246 113.62093:2640 118.08656:981691 124.78466:2585 129.10258:1062545 130.04988:2784 152.39212:2413 157.09769:31159 157.44926:2449 175.1082:88394 175.12399:4155	10033	78385	2930709	2014598	231062	205839	842747	2066270	986402	1545228	1268798	8842434	4889248	943505	1393177	1820213	466250	334631	199108	895236	1551920	1626986	1700482	1736864
Histidine	lvl 1	9.56	156.077	MS & library MS/MS match & retention time match	[M+H]+	HILIC+	Peptide Cluster 1	Amino acids, peptides, and analogues	HNDVDQJCIGZPNO-YFKPBYRVSA-N	C1=C(NC=N1)C[C@@H](C(=O)O)N	156.0773:2727699 157.08065:214084 158.08401:0	64.78973:1951 82.0527:8070 83.06065:37688 88.60712:2302 93.04526:20741 95.06066:103100 110.07157:1767288 111.05568:3163 111.09178:2677 113.10762:54977 116.77465:2244 146.05122:2482 156.07721:504020	775238	1573616	20462780	25568594	4027564	2727699	9160426	22807352	9561611	16435047	21778012	88337544	63166184	15459426	16153069	21445982	22546106	6291242	1592913	5634298	17357962	17993444	15677770	14577800
Lysine	lvl 1	9.675	147.113	MS & library MS/MS match & retention time match	[M+H]+	HILIC+	Peptide Cluster 1	Amino acids, peptides, and analogues	KDXKERNSBIXSRK-YFKPBYRVSA-N	C(CCN)C[C@@H](C(=O)O)N	147.11308:62100576 148.11643:5188116 149.11979:313316	53.60414:31499 54.40432:27277 84.08099:1256372 89.8396:26471 119.15459:25263 121.73755:27402 130.08667:386162 147.11374:42737	875100	6000170	129100064	96454464	23686308	30960964	67676040	113085184	57931884	89661592	78203592	192677216	136219152	56921924	71561920	91178304	93455256	46432008	26048502	55920224	72927688	80280952	76709568	73590928
Methionine	lvl 1	7.537	150.059	MS & library MS/MS match & retention time match	[M+H]+	HILIC+	Peptide Cluster 1	Amino acids, peptides, and analogues	FFEARJCKVFRZRR-BYPYZUCNSA-N	CSCC[C@@H](C(=O)[O-])[NH3+]	150.0587:1962583 151.06205:0 152.06541:713878	56.04988:315225 61.01097:99616 74.02383:12402 74.06027:25847 80.91993:1961 84.0444:3291 85.02856:9767 87.02662:31366 88.07615:3266 102.05527:99170 104.05312:418147 105.0375:4295 122.06032:38911 127.91595:1996 129.10983:2009 130.36217:2769 133.03217:266047 150.05634:210782 150.07819:150783 150.11371:3324	0	70592	3552643	3653315	711231	571451	2277988	3730260	1297532	2681820	2287287	19471386	10434779	999772	1783717	2130365	3413327	835609	224775	1344209	2895249	3035639	2903362	2811788
Methioninesulfoxide	lvl 1	8.674	166.054	MS & library MS/MS match & retention time match	[M+H]+	HILIC+	Peptide Cluster 1	Amino acids, peptides, and analogues	QEFRNWWLZKMPFJ-YGVKFDHGSA-N	CS(=O)CC[C@@H](C(=O)O)N	166.05374:4619572 167.05709:326261 168.06045:327513	52.17141:2074 53.60835:2258 56.04988:150044 58.06581:2700 71.07322:16288 74.02384:647321 74.06026:11513 75.02651:148649 84.04469:2562 86.09663:605443 98.98507:2817 102.05524:116586 120.081:4611 124.08723:3657 125.00011:12968 148.04218:2621 149.02718:107465 153.95923:2381 166.05362:106278 166.06937:3529 166.09801:3416	69850	306050	4619572	2957101	398870	524258	1594276	4399744	3506485	3128195	3699266	14467725	12418131	3923742	4053342	4008094	1965235	1322674	851407	2550804	4931126	4818045	4685636	4876030
Pantothenic acid	lvl 1	3.637	220.118	MS & library MS/MS match & retention time match	[M+H]+	HILIC+	Peptide Cluster 1	Alcohols and polyols	GHOKWGTUZJEAQD-ZETCQYMHSA-N	CC(C)(CO)[C@H](C(=O)NCCC(=O)O)O	220.11848:9893257 221.12183:930968 222.12519:47190	56.93408:6174 57.07027:37221 57.70884:7309 59.0496:43986 67.05452:30588 69.07003:74536 70.02885:13021 72.04458:197493 73.02863:40888 74.02424:7457 81.13982:7094 85.06505:142883 86.0965:14180 87.0351:7224 87.0806:49646 90.0552:2278679 95.04935:75500 98.02383:145873 100.03928:56177 103.0756:198255 113.06003:40015 116.03452:339065 124.07603:196037 128.67815:7795 131.07056:29237 132.10315:7669 136.42…	74049	65060	1895424	1392157	1280617	418289	730054	3456105	616583	1093438	1555806	10448417	6585880	1116700	532193	696424	5198686	1510954	96042	748497	1671591	1633518	1610122	1729266
Phenylalanine	lvl 1	6.999	166.087	MS & library MS/MS match & retention time match	[M+H]+	HILIC+	Peptide Cluster 1	Amino acids, peptides, and analogues	COLNVLDHVKWLRT-QMMMGPOBSA-N	C1=CC=C(C=C1)C[C@@H](C(=O)O)N	166.08672:23817620 167.09007:3426402 168.09343:154455	87.03846:7653 96.33499:7614 103.05439:93170 104.05282:9270 107.04961:52011 120.08109:4645635 131.04944:181381 149.05995:86984 161.65398:9663 166.08681:332878 166.10182:15533	1243095	9898683	101071824	84355016	22647310	16227584	52047364	84899432	34882804	61004580	55833952	202744576	122585048	35821988	44142312	64736632	33452260	21873930	10299372	27696048	58291040	60290860	60304316	60103992
S-Adenosyl-methionine	lvl 1	9.815	399.145	MS & library MS/MS match & retention time match	[M+H]+	HILIC+	Peptide Cluster 1	5'-deoxy-5'-thionucleosides	MEFKEPWMEQBLKI-AIRLBKTGSA-N	C[S+](CC[C@@H](C(=O)[O-])N)C[C@@H]1[C@H]([C@H]([C@@H](O1)N2C=NC3=C(N=CN=C32)N)O)O	399.14548:2967366 400.14883:699640 401.15219:86464	53.26874:2288 56.04988:84950 61.01095:32005 69.0338:24243 74.02386:27394 74.06022:49246 75.02652:10312 78.57096:2601 83.10345:2602 84.04443:9622 84.89207:2428 97.02865:554845 102.05521:427455 103.02142:4415 107.01035:3140 136.06215:792253 145.03235:42237 150.07841:2934 157.38449:3143 163.04292:32728 228.19986:3010 232.08315:12037 250.09413:1469852 264.09161:63772 298.09778:238193 399.14432:34022	0	0	0	13303	5789	0	0	0	0	1627	0	112740	125989	9514	10908	3094	11720	0	0	0	0	0	0	0
Tryptophan	lvl 1	6.973	205.098	MS & library MS/MS match & retention time match	[M+H]+	HILIC+	Peptide Cluster 1	Indolyl carboxylic acids and derivatives	QIVBCDIJIAJPQS-VIFPVBQESA-N	C1=CC=C2C(=C1)C(=CN2)C[C@@H](C(=O)O)N	205.09773:40056968 206.10108:5084062 207.10444:178680	65.5291:18913 74.02366:37444 78.50539:15151 82.28625:17153 118.06501:206715 118.72105:18077 132.08109:191603 142.06502:28178 144.08115:516015 146.06038:3073036 159.09201:422618 159.1794:20459 160.07558:25769 170.06041:173095 188.07104:6835192 205.09773:160141	122276	2152758	39497504	31620414	4370870	4898472	12849874	34571440	14882907	22257012	16985016	48776248	35246352	13067268	16953744	27219506	10751306	9336680	3787897	11904802	19906958	21979100	20062348	23303088
5'-Methylthioadenosine	lvl 1	2.63	298.098	MS & library MS/MS match & retention time match	[M+H]+	HILIC+	Peptide Cluster 2	5'-deoxy-5'-thionucleosides	WUUGFSXJNOTRMR-IOSLPCCCSA-N	CSC[C@@H]1[C@H]([C@H]([C@@H](O1)N2C=NC3=C2N=CN=C3N)O)O	298.09753:758824 299.10088:93100 300.10424:26228	50.49176:1954 52.16153:2444 60.06572:1949 60.0693:1942 61.01093:19740 75.02625:3872 89.94582:2086 97.02827:5237 136.06204:403836 145.0316:14014 155.73816:2045 163.04222:9004 184.42572:2069 200.73502:3867 205.39685:2314 266.79657:2943 290.44196:2088 298.0979:44035 298.13559:4193	6712	0	479314	676765	858631	200217	239472	431969	443978	591896	579897	682332	745105	185026	323934	506923	307821	111299	42076	589171	528534	486289	530140	487259
Ala-Leu	lvl 1	7.764	201.123	MS & library MS/MS match & retention time match	[M-H]-	HILIC-	Peptide Cluster 2	Amino acids, peptides, and analogues	RDIKFPRVLJLMER-UHFFFAOYSA-N	CC(C)CC(C(=O)O)NC(=O)C(C)N	201.12314:245728 202.12649:34066 203.12985:0	57.99985:1853 64.62814:2209 66.47266:2320 87.05477:8156 88.03886:25562 130.08557:17265 133.04906:11056 135.07047:1967 154.94762:2532 157.13324:50891 201.1232:124099	8961	16739	389408	403600	197589	68687	193675	385369	165676	157365	181500	488079	585599	164191	193923	187066	123058	59855	49531	57843	131838	216531	256128	309312
Asparagine	lvl 1	8.87	131.045	MS & library MS/MS match & retention time match	[M-H]-	HILIC-	Peptide Cluster 2	Amino acids, peptides, and analogues	DCXYFEDJOCDNAF-REOHCLBHSA-N	C([C@@H](C(=O)[O-])[NH3+])C(=O)N	131.04468:4773166 132.04803:276101 133.05139:443074	58.02823:4156 58.49736:1961 66.53671:1811 70.02819:41223 71.0235:9785 72.00747:14281 72.99721:1976 85.02751:1965 95.02351:20894 95.02924:2349 111.01841:2187 113.03408:58969 114.01796:90511 114.87795:2010 131.04408:9545 131.05322:47682	996523	805446	2505287	3520300	6850980	1009145	1708895	1692857	1507925	1947880	1614849	3057770	3298470	911032	1448537	1623808	1754834	988972	868655	2398544	2040247	2518917	2430954	2421463
Citrulline	lvl 1	8.952	176.103	MS & library MS/MS match & retention time match	[M+H]+	HILIC+	Peptide Cluster 2	Amino acids, peptides, and analogues	RHGKLRLOHDJJDR-BYPYZUCNSA-N	C(C[C@@H](C(=O)O)N)CNC(=O)N	176.10341:8069973 177.10676:939450 178.11012:0	55.80936:4748 68.22334:4799 70.06532:1021446 86.06014:10002 87.09183:8165 95.03156:5204 97.07619:39591 113.07117:1530691 114.05524:264642 115.08689:470542 116.07091:273233 130.09758:27336 131.08156:7775 133.09795:41200 141.06639:67599 142.05038:31157 152.38153:4999 159.07681:3409132 173.55313:5424 176.1035:133760	356890	792460	1901302	4117290	7573257	2077203	4868922	4995225	491238	1316550	1455516	9524497	10184952	3458828	1930874	2468532	9113957	3207199	254466	1756326	2521460	2564646	2548746	2805878
LPC 20:0	lvl 1	3.081	552.405	MS & library MS/MS match & retention time match	[M+H]+	CSH+	Peptide Cluster 2	Glycerophosphocholines	UATOAILWGVYRQS-HHHXNRCGSA-N	CCCCCCCCCCCCCCCCCCCC(=O)OC[C@H](COP(=O)([O-])OCC[N+](C)(C)C)O	552.40442:918731 553.40777:282509 554.41113:40344	71.07317:2885 79.63603:2612 86.09667:50875 89.31989:2429 104.10734:247930 125.00035:18955 184.07404:319411 197.35165:15604 246.73799:2819 251.40945:2609 258.10986:4716 301.06906:2787 369.33783:3912 404.04288:2631 534.3941:25500 552.40442:118637	0	0	274622	918731	601606	318454	889582	853733	347803	1127018	602309	421532	438254	127243	189306	446588	376755	202887	76584	237686	484811	611799	572836	615180
LPE 18:2	lvl 1	1.179	476.276	MS & library MS/MS match & retention time match	[M-H]-	CSH-	Peptide Cluster 2	Glycerophosphoethanolamines	DBHKHNGBVGWQJE-USWSLJGRSA-N	CCCCC/C=C\C/C=C\CCCCCCCC(=O)OC[C@H](COP(=O)(O)OCCN)O	476.27625:2837055 477.2796:784094 478.28296:135115	78.95734:44005 116.75588:2543 140.00961:32163 152.99365:11155 161.85954:2506 163.11099:2747 172.05383:2695 196.03654:116739 200.46086:5157 214.04637:26759 239.8063:2733 279.23154:1147842 461.94385:3060 476.27597:270012	12974	0	339219	1381916	4687885	1501506	3433490	745873	125658	764385	785106	5688154	4139318	710052	410371	525573	190730	6929	22029	39551	1157360	1425574	1422717	1541405
N-Acetyl-L-methionine	lvl 1	3.23	190.053	MS & library MS/MS match & retention time match	[M-H]-	HILIC-	Peptide Cluster 2	Amino acids, peptides, and analogues	XUYPXLNMDZIRQH-UHFFFAOYSA-N	CC(=O)NC(CCSC)C(=O)O	190.05284:1063162 191.05619:89719 192.05955:71102	50.0499:2045 69.87434:2085 84.04382:26934 98.05949:40284 112.03905:14897 142.04927:139944 146.06235:3134 148.04205:176151 185.09312:1985 190.0526:78603	22586	44794	441693	997480	1131865	1030560	2321241	1474228	384063	559224	615365	3644417	2730583	329957	407225	480011	602790	352823	68698	572514	856718	1069554	1063162	1126581
N-epsilon-Acetyllysine	lvl 1	8.198	189.124	MS & library MS/MS match & retention time match	[M+H]+	HILIC+	Peptide Cluster 2	Amino acids, peptides, and analogues	DTERQYGMUDWYAZ-ZETCQYMHSA-N	CC(=O)NCCCC[C@@H](C(=O)O)N	189.12392:4934966 190.12727:378840 191.13063:0	66.10355:3382 68.70849:3257 70.06548:16974 74.74635:3213 81.19757:3341 84.081:696713 88.15059:3960 88.73607:3952 93.24477:4221 112.07616:7092 114.055:5618 115.05882:19788 126.09168:2225969 129.10278:4394 130.08662:83537 133.57262:3826 143.11827:181410 147.11342:9093 150.63687:3780 172.09691:4716 172.13371:5434 189.12383:331449	5590	18176	164280	53768	86618	47692	119852	131469	46309	49352	49314	451504	355387	54286	39959	53742	140922	39731	0	72102	90840	104557	114204	106574
Tyrosine	lvl 1	7.78	182.082	MS & library MS/MS match & retention time match	[M+H]+	HILIC+	Peptide Cluster 2	Amino acids, peptides, and analogues	OUYCCCASQSFEME-QMMMGPOBSA-N	C1=CC(=CC=C1C[C@@H](C(=O)O)N)O	182.08177:1426307 183.08512:129007 184.08848:0	50.21745:2181 70.06509:11258 70.93126:2599 72.08092:28882 83.438:2014 91.05425:13047 91.47832:2179 95.04903:5074 96.08092:8600 97.07617:43565 98.09657:28904 111.09193:70310 113.10764:4161 119.04944:82789 121.06519:4527 122.09674:12007 123.0443:151174 136.07607:484480 139.12334:550611 147.04451:80208 165.0551:249742 177.80894:2396 179.73299:1911 182.08083:46461 182.16699:22968 182.19083:3029	129811	182462	1767909	2256303	4426808	1974971	2436120	2028423	862611	1215176	1513661	4528960	3482075	1384518	1139199	1352508	542022	399892	179076	507419	1183393	1268791	1435165	1250685
Uridine	lvl 1	5.098	243.061	MS & library MS/MS match & retention time match	[M-H]-	HILIC-	Peptide Cluster 2		DRTQHJPVMGBUCF-XVFCMESISA-N	C1=CN(C(=O)NC1=O)[C@H]2[C@@H]([C@@H]([C@H](O2)CO)O)O	243.06107:3523723 244.06442:389435 245.06778:65062	54.30754:2055 59.01221:4144 61.15633:2044 63.86081:1911 66.0333:42460 68.01251:2173 72.91718:2424 81.39677:2099 82.0282:72141 85.55674:2302 94.02827:4265 96.04387:5302 108.04389:14492 110.02311:576749 111.01832:51229 117.0178:4905 118.42346:2485 120.04353:3555 122.02327:39052 124.0389:13712 138.01709:2360 138.05467:3312 140.03374:77493 145.57092:2330 152.03369:118458 153.02893:40925 164.03474:251…	338685	199508	1689732	3786679	1912828	1383803	3098091	3019119	1453638	716998	603646	4630758	4385978	786175	1860253	1101067	301856	179363	1044683	2987998	1757503	2216852	2386604	2242273
Ala-Ala	lvl 1	8.462	159.076	MS & library MS/MS match & retention time match	[M-H]-	HILIC-	Peptides and Ceramide Cluster	Amino acids, peptides, and analogues	DEFJQIDDEAULHB-QWWZWVQMSA-N	C[C@H](C(=O)N[C@H](C)C(=O)O)N	159.07607:1268325 160.07942:99729 161.08278:4649	55.96931:1700 58.12954:2003 87.05449:11026 88.03889:69825 98.05944:7915 115.08617:48282 123.67211:1905 159.06117:4381 159.07594:100483	89241	220857	3704504	1404789	572541	398854	746972	1860096	1294446	1268325	992773	2120822	1700026	971975	1523274	1608824	1337590	1050526	792128	1550606	1662642	1655945	1660299	1879843
Ceramide d34:2	lvl 1	5.112	594.509	MS & library MS/MS match & retention time match	[M+CH3COO]-	CSH-	Peptides and Ceramide Cluster	Ceramides	XXWRZIYYFPIQHE-XPAOSYCESA-N	CCCCCCCCCCCCCCCC(=O)N[C@@H](CO)[C@@H](/C=C/CCCCCCCC/C=C\CCC)O	594.50867:761997 595.51202:314244 596.51538:66484	93.65162:2940 95.48695:2687 122.00667:2600 150.84117:2512 209.19011:6481 235.20505:12309 237.22061:2836 261.2226:3344 280.26288:18464 288.87912:2607 306.2796:21013 367.35703:13307 420.21558:3028 460.74741:2998 486.46484:4961 504.47992:4157 534.48718:103607	0	0	356020	16423	33712	10650	138925	156350	42585	62727	24199	73155	90972	0	88039	39826	142457	11405	14587	132183	138058	172263	176586	177460
Ceramide d38:1	lvl 1	7.116	594.585	MS & library MS/MS match & retention time match	[M+H]+	CSH+	Peptides and Ceramide Cluster	Ceramides	XWBWIAOWSABHFI-NUKVNZTCSA-N	CCCCCCCCCCCCCCCCCCCC(=O)N[C@@H](CO)[C@@H](/C=C/CCCCCCCCCCCCC)O	594.58478:695883 595.58813:321969 596.59149:44934	72.31464:2704 78.19489:2613 82.06558:5321 82.43983:2671 106.81692:3119 169.15981:2539 171.65738:3206 198.11859:6878 224.23781:17727 236.23822:244067 252.2682:4208 254.24846:25853 264.26959:59921 282.28015:12523 289.53119:2921 404.20877:2789 558.56042:11026 576.5741:42449	0	0	443958	231818	83823	56138	194938	240862	213793	69711	62840	121912	113722	37610	289345	47846	380098	93744	7509	84594	191979	324179	316593	325297
Ceramide d40:1	lvl 1	7.777	622.616	MS & library MS/MS match & retention time match	[M+H]+	CSH+	Peptides and Ceramide Cluster	Ceramides	KEPQASGDXIEOIL-GLQCRSEXSA-N	CCCCCCCCCCCCCCCCCCCCCC(=O)N[C@@H](CO)[C@@H](/C=C/CCCCCCCCCCCCC)O	622.61554:619807 623.61889:300290 624.62225:99018	74.57479:2538 78.5967:3189 83.14013:2539 90.23679:3034 106.08753:2907 197.40649:15737 224.23724:10411 236.23795:97742 245.4686:2996 250.2538:30905 252.26941:13628 254.24805:14165 264.26968:118683 282.27911:13031 340.23248:2957 392.44669:3113 529.41919:2791 552.85168:2775 586.58862:4823 604.60388:33692	0	0	564730	341177	129340	114902	282787	583093	358105	198813	83571	252239	296307	147389	410391	125330	619807	154559	27788	171063	254089	359407	412856	533987
Ceramide d41:1	lvl 1	8.095	636.632	MS & library MS/MS match & retention time match	[M+H]+	CSH+	Peptides and Ceramide Cluster	Ceramides	NAJHAHQNQCNWOP-PUYNVXOJSA-N	CCCCCCCCCCCCCCCCCCCCCCC(=O)N[C@@H](CO)[C@@H](/C=C/CCCCCCCCCCCCC)O	636.6319:986574 637.63525:495766 638.63861:127840	82.06573:5808 88.29615:2991 144.95061:2942 149.28563:3275 166.80052:2860 202.56685:3971 250.25352:29913 252.2686:27078 264.26968:314507 268.04391:3250 268.26617:3938 282.27972:39975 308.60614:3055 354.37454:5551 354.57327:2885 600.60663:16513 618.62115:56190	0	0	253354	145808	82900	44819	129772	318890	300964	113470	28689	123164	173067	76902	261938	75719	346796	76017	0	107431	157525	202990	244449	254471
Ceramide d42:1	lvl 1	8.408	650.648	MS & library MS/MS match & retention time match	[M+H]+	CSH+	Peptides and Ceramide Cluster	Ceramides	ZJVVOYPTFQEGPH-AUTSUKAISA-N	CCCCCCCCCCCCCCCCCCCCCCCC(=O)N[C@@H](CO)[C@@H](/C=C/CCCCCCCCCCCCC)O	650.64801:1384326 651.65136:603094 652.65472:134569	76.29956:2526 81.07001:4700 82.06535:12566 93.07013:5573 150.21184:2853 158.11136:3105 166.45212:4055 174.95334:5111 200.39471:2791 200.4122:3823 200.95303:3378 236.51732:2925 236.55063:2942 252.2702:47053 264.26968:519643 282.27994:76455 292.29984:4640 310.92554:3162 368.39047:11437 602.62402:6262 614.62207:19747 632.63611:86744	0	0	381867	263544	115596	91441	211533	465164	231538	155162	53799	203646	211481	93399	230622	138035	245641	60487	23524	124027	180249	290758	268850	337072
Glu-Gln	lvl 1	9.488	274.104	MS & library MS/MS match & retention time match	[M-H]-	HILIC-	Peptides and Ceramide Cluster	Amino acids, peptides, and analogues	MGHKSHCBDXNTHX-UHFFFAOYSA-N	C(CC(=O)O)C(C(=O)NC(CCC(=O)N)C(=O)O)N	274.10367:567746 275.10702:76545 276.11038:4737	61.52033:1838 82.0282:4571 84.04411:3374 101.07063:11403 120.0762:2472 126.22733:1948 127.04956:44744 127.05762:2553 128.03389:22954 145.0603:102016 148.28937:2935 150.74646:2174 168.11313:13396 177.90224:4757 194.09236:19667 199.0135:8522 211.88686:2119 212.10272:12154 238.08286:24353 252.33263:2495 256.0925:50782 274.10336:43868	6907	30705	589195	312922	119472	160491	303004	380247	459246	357091	201113	630718	473164	182168	362007	285498	808559	235052	277052	567746	402981	514759	435258	665681
Gly-Tyr	lvl 1	8.252	237.087	MS & library MS/MS match & retention time match	[M-H]-	HILIC-	Peptides and Ceramide Cluster	Amino acids, peptides, and analogues	XBGGUPMXALFZOT-VIFPVBQESA-N	C1=CC(=CC=C1C[C@@H](C(=O)O)NC(=O)CN)O	237.08702:226473 238.09037:37861 239.09373:0	58.92599:1948 59.16767:1887 63.1638:2160 73.0391:62916 73.04327:2984 75.00736:3432 85.03984:2145 91.70949:1901 99.63698:2445 119.04895:12466 146.9938:2164 153.96255:2398 163.03873:3634 180.06544:25010 193.09729:9410 199.18729:9500 237.06213:3657 237.08728:53392	21275	41965	218753	167975	28164	17390	71619	132007	137696	138250	110931	222016	176632	80258	140353	134473	81492	101911	34431	142767	134067	176749	189735	202236
Serine	lvl 1	8.79	106.05	MS & library MS/MS match & retention time match	[M+H]+	HILIC+	Peptides and Ceramide Cluster	Amino acids, peptides, and analogues	MTCFGRXMJLQNBG-REOHCLBHSA-N	C([C@@H](C(=O)O)N)O	106.05022:5180904 107.05357:162029 108.05693:158128	58.26584:1803 60.04477:853967 64.92753:19149 70.02905:13257 80.49138:2193 85.5155:2017 87.06371:2331 88.03952:134989 88.06981:4864 106.05023:53311	143030	341720	2577856	2614825	1456283	650729	1945159	2481307	1376509	1848530	1861294	13572925	7871963	1378671	1848828	2254191	3602041	1743305	567444	2385301	3254674	3503065	3411196	3369983
Threonine	lvl 1	8.402	118.049	MS & library MS/MS match & retention time match	[M-H]-	HILIC-	Peptides and Ceramide Cluster	Amino acids, peptides, and analogues	AYFVYJQAPQTCCC-GBXIJSLDSA-N	C[C@H]([C@@H](C(=O)O)N)O	118.04936:1595228 119.05271:90398 120.05607:6918	65.14207:2009 72.00742:14388 74.02318:34084 117.92673:6032 118.04938:3037	191647	1341254	8450466	5640234	1595228	1823821	4145037	5229896	5016512	5927400	4909402	8407850	8402256	2912502	3801004	4395864	7890870	6139868	2035545	7825967	6538037	6401514	6816650	7137961
1-(1Z-Hexadecenyl)-sn-glycero-3-phosphocholine	lvl 2A	5.465	480.346	MS & library MS/MS match	[M+H]+	HILIC+	Bile Cluster 1	Glycerophosphocholines	HTZINLFNXLXRBC-CQLBIITFSA-N	CCCCCCCCCCCCCC/C=C\OC[C@H](COP(=O)([O-])OCC[N+](C)(C)C)O	480.34613:463043 481.34948:138564 482.35284:0	60.08114:27520 71.07303:5919 81.06912:3025 86.09658:125447 86.10238:4978 102.12355:2840 104.10719:259362 105.07245:2362 115.81114:3207 125.0001:66125 166.22862:2620 181.02647:58358 184.07365:100912 240.10023:48959 453.1763:2580 480.34589:336537	0	0	374597	284812	32895	18030	76010	102214	98015	307576	399129	271797	148731	20553	116272	237380	88975	72103	0	101260	140803	154223	155267	202481
7.alpha.,17.alpha.-Dimethyl-5.beta.-androstane-3.alpha.,17.beta.-diol glucuronide	lvl 2A	6.195	495.295	MS & library MS/MS match	[M-H]-	HILIC-	Bile Cluster 1	Steroidal glycosides	PCMAVZDVKFXHRU-JAOKJGKVSA-N	CC1CC2CC(CCC2(C3C1C4CCC(C4(CC3)C)(C)O)C)O	495.29483:231542 496.29818:64039 497.30154:8173	71.01215:4302 75.00716:36487 85.02792:34103 87.09748:2218 89.0224:2353 95.01234:3057 99.0072:2645 110.72002:2565 113.02276:24573 137.45662:2461 221.30629:2395 282.03223:2571 407.28421:3161 468.4664:2642 477.28381:3265 495.29456:182387	0	0	127866	101844	24546	21448	36431	71799	76591	240385	231542	100993	104697	52528	82341	172332	70069	31405	8623	26830	82910	95072	107967	110912
Ala-Asp	lvl 2A	9.079	203.066	MS & library MS/MS match	[M-H]-	HILIC-	Bile Cluster 1	Hybrid peptides	XAEWTDMGFGHWFK-IMJSIDKUSA-N	C[C@@H](C(=O)N[C@@H](CC(=O)O)C(=O)O)N	203.06601:2677089 204.06936:277520 205.07272:52488	51.79143:1997 57.37655:2199 70.02818:3849 71.01224:43511 72.04382:4671 80.39603:2048 81.19889:2248 87.05476:401632 88.03877:350792 96.99171:3938 98.05926:3537 103.35252:2170 114.01808:12824 115.00204:138419 115.01125:4994 115.08605:46454 121.77817:2240 126.01169:2442 141.06508:22437 159.07596:271375 167.04494:31902 171.74409:2097 185.0555:36268 195.89458:2233 198.8503:2194 203.06602:228637	37670	93064	1596335	1454293	73634	108071	498019	1852351	2016504	2124640	1990157	2585302	1260251	965280	1639808	2073113	697975	440608	113515	572206	1347511	2363683	2327788	2878472
Androstan-3-ol-17-one 3-glucuronide	lvl 2A	6.128	484.292	MS & library MS/MS match	[M+NH4]+	HILIC+	Bile Cluster 1	Steroidal glycosides	VFUIRAVTUVCQTF-SDHZCXLISA-N	C[C@]12CC[C@H](C[C@H]1CC[C@@H]3[C@@H]2CC[C@]4([C@H]3CCC4=O)C)O[C@H]5[C@@H]([C@H]([C@@H]([C@H](O5)C(=O)O)O)O)O	484.29147:911944 485.29482:360810 486.29818:74428	81.07022:12780 95.01305:2850 95.08643:3468 100.72871:2787 104.10702:3920 105.07054:3805 107.08581:5843 109.10218:3121 119.08598:4637 121.10144:11145 133.10193:5210 135.11711:16598 141.01857:84775 143.98166:2553 145.10143:28265 147.11653:22848 149.13332:3793 159.02946:17273 159.11754:20143 161.13365:12986 173.13341:22210 175.14915:3308 177.03864:3286 184.07449:2928 187.14882:4056 191.14279:2962 19…	0	0	491204	426110	197473	136407	274380	304027	206730	996328	761407	444566	449478	184096	309436	722460	182998	96961	14004	115240	255912	300470	251366	298387
Androstane-3,17-diol, (3.alpha.,5.alpha.,17.beta.)-	lvl 2A	6.832	257.227	MS & library MS/MS match	[M+H-2H2O]+	HILIC+	Bile Cluster 1	Androstane steroids	CBMYJHIOYJEBSB-KHOSGYARSA-N	C[C@]12CC[C@H](C[C@@H]1CC[C@@H]3[C@@H]2CC[C@]4([C@H]3CC[C@@H]4O)C)O	257.22696:435248 258.23031:184649 259.23367:0	50.26372:1987 52.6577:2127 67.05428:2316 69.07044:2900 72.91506:2424 79.0541:2344 81.06985:15910 83.08574:18505 91.05441:2188 93.07014:5215 95.08575:25808 105.06957:2574 107.08556:11125 108.04462:4846 109.10115:17222 119.08592:3662 121.10117:23140 123.11695:3479 123.83498:2398 125.07129:47301 133.10135:9429 135.11685:24828 147.1171:55048 149.07166:2062 149.13298:26932 161.13303:50278 163.14886:36…	0	0	222193	244784	86536	49137	85599	146759	123748	435248	445341	287337	249017	96030	159995	367465	130169	53983	0	40508	145855	142913	158493	145073
Arg-Trp	lvl 2A	8.818	361.199	MS & library MS/MS match	[M+H]+	HILIC+	Bile Cluster 1	Amino acids, peptides, and analogues	QADCERNTBWTXFV-JSGCOSHPSA-N	C1=CC=C2C(=C1)C(=CN2)C[C@@H](C(=O)O)NC(=O)[C@H](CCCN=C(N)N)N	361.19922:3166388 362.20257:693633 363.20593:42804	58.41539:2537 60.05243:4193 60.05598:140958 70.06535:432608 71.04871:2416 72.08094:5921 73.20259:2734 86.09687:4406 88.076:3479 97.07632:9978 98.06:10591 100.05048:2943 112.08721:136947 114.1029:23793 115.08701:44184 116.07104:33644 117.22033:2526 125.07137:3879 130.06534:28230 130.09749:16598 133.06099:12207 140.0824:60171 146.06076:3592 147.58528:2822 157.10893:86614 158.09294:48546 159.09241:4…	0	69716	3166388	1612277	470764	308194	441758	1237144	875686	2132164	708658	445437	429278	469198	474777	901994	983415	1293928	333466	194750	859942	927748	955979	951101
Glycoursodeoxycholic acid AND Glycodeoxycholic acid	lvl 2A	4.86	448.305	MS & library MS/MS match	[M-H]-	HILIC-	Bile Cluster 1	Bile acids, alcohols and derivatives	GHCZAUBVMUEKKP-XROMFQGDSA-N	C[C@H](CCC(=O)NCC(=O)O)[C@H]1CC[C@@H]2[C@@]1(CC[C@H]3[C@H]2[C@H](C[C@H]4[C@@]3(CC[C@H](C4)O)C)O)C	448.30511:124022296 449.30846:35540200 450.31182:5808530	59.95939:73470 60.9325:65425 66.21016:53614 74.02314:23448792 109.7381:55571 150.92987:55054 197.35806:264258 197.37985:167090 220.41412:59266 223.71567:56621 384.28741:84037 386.30429:1451293 402.30142:75414 404.31638:394780 448.30521:48890336	146108	64326	158409072	130634280	56428512	42416236	85917200	116589976	124022296	198875760	204098656	157416112	172046336	127758296	152192000	213045264	156002912	119840840	36823800	109499512	120736048	155336464	178033600	194638560
His-Tyr	lvl 2A	8.875	319.141	MS & library MS/MS match	[M+H]+	HILIC+	Bile Cluster 1	Amino acids, peptides, and analogues	HTOOKGDPMXSJSY-STQMWFEESA-N	C1=CC(=CC=C1C[C@@H](C(=O)O)NC(=O)[C@H](CC2=CN=CN2)N)O	319.14102:1457747 320.14437:203240 321.14773:0	54.93702:2397 57.25021:2856 58.61759:2581 65.55595:2181 78.91223:2752 83.06057:22100 93.04511:12894 95.06049:2175 103.71239:3185 110.07159:1263787 111.47862:2513 115.25327:2394 116.15578:2436 121.03984:3642 136.07581:17839 138.06654:78835 156.07726:101875 166.06122:5606 182.08223:4650 182.31454:2655 199.6367:3404 199.65356:2432 228.11424:35360 233.70209:2244 256.10806:4110 273.13544:93756 284.103…	23019	116751	4697695	4033756	537248	552834	1064930	3459878	2245376	3369205	2692308	3199814	2292718	2073593	3153179	4243386	2070682	1590590	434546	1073000	1980689	2206332	2338344	2298919
LPC 12:0/0:0	lvl 2A	0.651	440.279	MS & library MS/MS match	[M+H]+	CSH+	Bile Cluster 1	Glycerophosphocholines	BWKILASWCLJPBO-UHFFFAOYNA-N	CCCCCCCCCCCC(=O)OCC(O)COP([O-])(=O)OCC[N+](C)(C)C	440.2789:1148233 441.28225:402883 442.28561:101474	83.39228:2399 86.09673:69216 104.10737:423502 109.10166:2690 125.00021:25421 163.01518:3321 184.07407:534221 257.21155:20461 258.11008:5199 363.19501:2545 370.40656:2629 422.26801:59828 440.27875:236601	0	0	75132	130691	26681	8151	16017	215208	0	107548	76556	0	4986	0	15412	0	177039	166808	0	40145	84291	99567	94681	119492
LPC 16:2/0:0	lvl 2A	0.759	492.311	MS & library MS/MS match	[M+H]+	CSH+	Bile Cluster 1		RBYFRQAINZHANG-NQLNTKRDNA-N	CCC\C=C/C\C=C/CCCCCCCC(=O)OCC(O)COP([O-])(=O)OCC[N+](C)(C)C	492.31033:1442347 493.31368:833480 494.31704:916008	72.4929:2228 75.33998:2433 77.59258:2153 83.91074:2656 86.09677:31384 104.10734:142050 125.00049:5686 148.50275:2679 153.35777:2770 184.07394:183872 196.66798:17067 206.78363:2440 263.89752:2664 366.49597:2544 474.29935:19826 492.30948:70000	0	0	976572	1442347	375266	116445	99717	195224	86173	1443786	850136	135996	69443	74358	69530	224194	251718	135780	0	8272	220719	229562	228263	270112
LPC 19:0/0:0	lvl 2A	2.71	538.389	MS & library MS/MS match	[M+H]+	CSH+	Bile Cluster 1	Glycerophosphocholines	WYIMORDZGCUBAA-UHFFFAOYNA-N	CCCCCCCCCCCCCCCCCCC(=O)OCC(O)COP([O-])(=O)OCC[N+](C)(C)C	538.38904:660847 539.39239:189297 540.39575:0	70.44482:2549 86.09702:21726 104.10735:125822 104.11515:5724 107.35958:2294 116.96712:2714 124.99985:9475 184.0741:156833 202.56084:2726 288.13544:2854 387.90506:2596 520.37854:17236 538.38959:68986	14091	4638	236294	393909	177323	94599	156429	722606	213565	823186	515305	157014	173051	143340	141719	152916	240644	119099	55289	138304	225218	316839	315752	355644
LPC O-18:0	lvl 2A	2.611	510.394	MS & library MS/MS match	[M+H]+	CSH+	Bile Cluster 1	Glycerophosphocholines	XKBJVQHMEXMFDZ-UHFFFAOYNA-N	CCCCCCCCCCCCCCCCCCOCC(O)COP([O-])(=O)OCC[N+](C)(C)C	510.3938:1603041 511.39715:517964 512.40051:106631	71.0733:5682 71.08595:2905 75.04427:3727 85.10128:2850 86.09678:56610 88.04016:3409 104.10734:592788 104.74936:2969 119.60324:2447 125.00021:34410 163.2074:2501 166.5746:2858 184.0741:113299 321.26666:2643 373.21997:3226 374.21616:25159 449.24478:3147 510.39355:247014	0	0	471576	254306	0	15725	92816	122197	70702	145054	169122	170949	133864	52414	94860	235236	55613	11584	0	90592	246052	328319	347261	345333
LPC O-18:1	lvl 2A	2.526	508.378	MS & library MS/MS match	[M+H]+	CSH+	Bile Cluster 1	Glycerophosphocholines	XWYSLMAMRKYUFH-SEYXRHQNNA-N	CCCCCCCC\C=C/CCCCCCCCOCC(O)COP([O-])(=O)OCC[N+](C)(C)C	508.37833:709082 509.38168:241581 510.38504:16782	81.66777:2262 86.09677:48332 86.89224:2876 104.09962:4210 104.10737:108362 124.95523:2619 125.00035:29825 151.11932:2575 181.02632:21118 184.07436:44304 202.61377:3207 213.0219:2434 240.10078:24360 310.80075:2427 349.81689:2558 508.37805:176476	0	0	149979	113211	0	0	7057	74246	50378	166388	131816	60161	72276	6419	53724	109344	21920	4295	4106	65943	80870	104921	106687	106086
Lys-Trp	lvl 2A	8.898	333.193	MS & library MS/MS match	[M+H]+	HILIC+	Bile Cluster 1	Amino acids, peptides, and analogues	RVKIPWVMZANZLI-ZFWWWQNUSA-N	C1=CC=C2C(=C1)C(=CN2)C[C@@H](C(=O)O)NC(=O)[C@H](CCCCN)N	333.19315:665331 334.1965:150938 335.19986:0	59.99792:2210 60.04431:2843 60.96546:2301 64.07301:2180 72.08044:2819 84.08103:370624 101.10752:28476 129.10265:125371 130.06586:3207 130.08669:4751 147.07715:5297 147.1131:26134 159.09236:22617 169.40726:2623 172.92639:2333 188.07123:19822 196.97856:15260 205.09798:5233 298.1568:3015 315.18182:3927 316.16681:35291 333.19305:134965	0	0	327740	483404	137650	132609	244697	418867	280682	589117	209918	384946	282386	192410	271475	352697	648286	342227	69931	116712	280499	304225	257423	348721
Lys-Tyr	lvl 2A	9.44	310.177	MS & library MS/MS match	[M+H]+	HILIC+	Bile Cluster 1	Amino acids, peptides, and analogues	MYTOTTSMVMWVJN-STQMWFEESA-N	C1=CC(=CC=C1C[C@@H](C(=O)O)NC(=O)[C@H](CCCCN)N)O	310.17688:1621346 311.18023:267109 312.18359:401935	56.04992:5725 66.92457:3176 67.05423:3028 74.97689:2273 84.08099:824006 101.10767:57265 102.09129:4144 103.66041:2291 104.82746:2820 110.07127:3333 111.3093:2262 111.83868:2527 112.07603:4462 119.76945:2628 126.73608:2198 129.10254:232687 130.08665:24364 136.076:22447 147.11317:79920 181.74443:2584 182.08163:13458 205.52588:2650 223.12744:2560 247.14456:5123 274.09433:2389 275.13965:11300 276.125…	0	127732	1894557	1619555	354130	282053	441896	1687323	1033114	1621346	1156476	1226951	895077	872865	1170368	1719336	771826	455677	360772	375597	701518	718844	720056	682612
Met-Ser	lvl 2A	8.351	235.075	MS & library MS/MS match	[M-H]-	HILIC-	Bile Cluster 1	Amino acids, peptides, and analogues	WEDDFMCSUNNZJR-WDSKDSINSA-N	CSCC[C@@H](C(=O)N[C@@H](CO)C(=O)O)N	235.07478:315717 236.07813:31552 237.08149:21165	58.9405:2189 59.86366:2409 72.46162:2026 74.02313:17860 113.07127:2395 118.40524:2065 148.04192:2619 157.061:3431 159.05898:2161 173.0737:5012 187.05371:10043 205.06393:108747 235.07443:41631	27601	52618	714047	327366	40506	32379	79494	188351	145380	315717	108260	144438	90507	37946	105462	132532	210000	132659	16317	44951	144710	156138	184189	202259
NAGly 42:6|NAGly 18:2/24:4	lvl 2A	4.96	696.56	MS & library MS/MS match	[M+H]+	CSH+	Bile Cluster 1		AQQFMLJYZJUELD-CVHWQRRONA-N	OC(=O)CN%20.CC/C=C\C/C=C\C/C=C\C/C=C\CCC%10CCCCCCCC(=O)%20.CCCCC/C=C\C/C=C\CCCCCCCC(=O)O%10	696.55872:505367 697.56207:285047 698.56543:126613	74.40688:2644 76.03944:32869 107.08623:3869 116.71497:2966 135.11722:5977 159.81712:3625 161.13292:3274 162.01366:2981 163.14903:4127 202.57513:3694 213.16492:3536 224.4167:3418 308.04477:3730 323.27432:27587 341.28604:29658 365.52567:2768 416.31772:92209	0	0	315739	555645	51360	26738	169107	107868	11913	145179	274754	261036	55659	7578	89428	0	50327	0	0	0	136177	151748	185656	161489
Ser-Tyr	lvl 2A	8.419	267.098	MS & library MS/MS match	[M-H]-	HILIC-	Bile Cluster 1	Amino acids, peptides, and analogues	MALNXHYEPCSPPU-ZJUUUORDSA-N	C1=CC(=CC=C1C[C@@H](C(=O)O)NC(=O)[C@@H](CO)N)O	267.09778:773521 268.10113:119364 269.10449:15442	58.91501:2535 73.03915:104181 73.04375:4051 74.02333:2390 74.14225:2100 80.03683:2742 81.04433:5241 91.89172:2388 107.04887:2803 108.05522:5187 119.04874:23207 130.08572:34737 131.04419:24566 136.07559:12973 140.14561:2386 141.10164:4129 147.77283:2137 161.05576:4805 163.03899:13180 180.0652:85289 193.09689:97978 197.12552:2880 206.12888:5357 223.10988:2185 223.15559:21112 237.08702:157039 249.08…	4709	28638	1043490	828751	73748	83764	195418	773521	624862	886846	591522	651364	605498	442486	474776	784739	298621	243846	54230	199017	412926	448306	519732	578843
Tauro-alpha-muricholic acid	lvl 2A	6.163	514.283	MS & library MS/MS match	[M-H]-	HILIC-	Bile Cluster 1	Bile acids, alcohols and derivatives	XSOLDPYUICCHJX-OEYGYFRSSA-N	C[C@H](CCC(=O)NCCS(=O)(=O)O)[C@H]1CCC2[C@@]1(CCC3C2[C@H]([C@H]([C@H]4[C@@]3(CC[C@H](C4)O)C)O)O)C	514.28235:2604842 515.2857:978689 516.28906:138239	71.60706:2678 75.69511:3196 124.00579:5957 201.53242:3623 514.28241:1800356	0	0	2604842	1989554	913176	439486	651803	1165743	1051850	4554277	4389298	2239985	2263385	651684	1059542	2719962	1448394	1767705	437697	1747336	1096216	1438474	1690920	2028208
Tauro-beta-muricholic acid	lvl 2A	5.872	514.283	MS & library MS/MS match	[M-H]-	HILIC-	Bile Cluster 1	Bile acids, alcohols and derivatives	XSOLDPYUICCHJX-UZUDEGBHSA-N	C[C@H](CCC(=O)NCCS(=O)(=O)O)[C@H]1CC[C@@H]2[C@@]1(CC[C@H]3[C@H]2[C@H]([C@H]([C@H]4[C@@]3(CC[C@H](C4)O)C)O)O)C	514.28253:718187 515.28588:271964 516.28924:50829	50.51619:2340 52.13436:2361 59.18882:2536 59.85555:2490 62.94135:2399 94.26187:2865 122.9744:5300 173.04456:3048 197.1243:19511 229.65933:2686 242.32019:2546 298.65628:2544 319.06393:3037 496.27075:10284 514.28229:837698	0	0	384289	259995	110916	79785	145893	159216	126111	602569	718187	292468	311708	120345	225903	459342	306115	309804	81498	242039	202131	254639	294707	343778
Taurolithocholic acid	lvl 2A	4.625	482.293	MS & library MS/MS match	[M-H]-	HILIC-	Bile Cluster 1	Bile acids, alcohols and derivatives	QBYUNVOYXHFVKC-GBURMNQMSA-N	C[C@H](CCC(=O)NCCS(=O)(=O)O)[C@H]1CC[C@@H]2[C@@]1(CC[C@H]3[C@H]2CC[C@H]4[C@@]3(CC[C@H](C4)O)C)C	482.2897:1215203 483.29305:348841 484.29641:83594	50.42168:2224 53.15815:2339 61.35717:2355 79.49566:2229 92.47333:2275 107.4148:2332 116.41362:2313 163.49818:2467 289.49316:2848 345.36554:2948 413.49652:2770 482.28961:554744	0	0	3532431	2445555	616371	126048	646990	1057503	738172	6435706	6051843	2296238	1534481	821424	1375160	5558910	2969284	1507403	131336	925438	1292159	1599943	1994380	2128653
Tauroursodeoxycholic acid	lvl 2A	5.528	498.288	MS & library MS/MS match	[M-H]-	HILIC-	Bile Cluster 1	Bile acids, alcohols and derivatives	BHTRKEVKTKCXOH-OGTVOWCVSA-N	C[C@H](CCC(=O)NCCS(=O)(=O)O)C1CCC2C1(CCC3C2C(CC4C3(CC[C@H](C4)O)C)O)C	498.28751:191574912 499.29086:58986992 500.29422:7161225	79.95553:10920 80.96352:13170 96.92759:9389 100.23837:7569 106.9791:14286 124.00554:16050 152.99405:15520 153.99646:7934 243.82121:7820 269.24707:33833 270.2507:100890 313.19696:9041 401.87839:8968 498.28732:23941474	280080	146656	207201296	193551072	79122784	56953220	103877232	110940736	92004632	352623072	339131328	214755232	160604016	133895728	197132896	312289280	178092688	127564320	59359460	167089376	178630128	194162688	237355536	247190816
1-Methyluric acid	lvl 2A	6.097	181.035	MS & library MS/MS match	[M-H]-	HILIC-	Bile Cluster 2	Purines and purine derivatives	QFDRTQONISXGJA-UHFFFAOYSA-N	CN1C(=O)C2=C(NC(=O)N2)NC1=O	181.03522:3914993 182.03857:346757 183.04193:36578	50.54045:2044 59.01237:2233 67.90461:1947 68.20354:2171 83.02348:30325 96.01889:2801 101.02279:3950 105.22953:2399 110.03462:2452 120.0545:2175 122.0217:15807 124.01412:2953 136.03265:3490 137.04581:2169 138.02927:240017 143.71948:2323 149.9939:2210 181.0352:683800	18373	109706	957574	1521980	555074	1066044	1242282	2182868	2851252	2214639	1892849	2616544	2884920	1625032	3914993	3687431	2626679	2726238	1585136	4629036	1801456	2213584	2203986	2505420
3-Cysteinylacetaminophen	lvl 2A	7.698	271.075	MS & library MS/MS match	[M+H]+	HILIC+	Bile Cluster 2	Amino acids, peptides, and analogues	LLHICPSCVFRWDT-QMMMGPOBSA-N	CC(=O)NC1=CC(=C(C=C1)O)SC[C@@H](C(=O)O)N	271.07538:1600829 272.07873:259543 273.08209:89238	51.6811:2293 74.00514:2014 75.31561:2392 75.65083:2162 94.89415:2246 140.01675:335450 166.03239:25501 182.0274:364754 199.22878:8828 208.04327:169114 225.06964:54386 229.06508:3091 230.83319:2778 254.04884:49409 271.07541:80877	0	0	0	0	0	236981	1433927	4766004	3544581	11883009	15179478	19369922	18120170	5745346	6746686	16931836	5710963	2698731	653548	2068960	2508288	2713647	2744611	2876253
3-Methoxy-4-hydroxyphenylglycol sulfate	lvl 2A	2.953	263.022	MS & library MS/MS match	[M-H]-	HILIC-	Bile Cluster 2	Methoxyphenols	SBKADJXSGGTEPN-UHFFFAOYSA-N	COC1=C(C=CC(=C1)C(CO)OS(=O)(=O)O)O	263.02206:633601 264.02541:58241 265.02877:20176	79.95574:16065 86.05184:1981 96.95812:4021 123.04347:2376 150.03059:82147 160.76526:2502 165.05418:133096 183.06512:19119 202.99933:8333 206.60628:2414 209.23843:2137 263.02203:128651	0	0	36258	143874	31794	56515	103575	225214	162002	235009	226513	208401	229031	142153	369088	365953	123105	126672	75569	313276	167870	194885	198678	223059
Ceramide 36:2;2O|Ceramide 18:1;2O/18:1	lvl 2A	5.815	564.537	MS & library MS/MS match	[M+H]+	CSH+	Bile Cluster 2	Alcohols and polyols	OBFSLMQLPNKVRW-BXBVYGNFNA-N	CCCCCCCCCCCCC\C=C\C(O)C(CO)NC(=O)CCCCCCC\C=C/CCCCCCCC	564.53754:1528782 565.54089:617965 566.54425:150345	82.06533:10606 93.06931:2947 129.03487:3089 252.27013:34175 262.25446:13227 264.26959:356678 280.26398:2766 282.28033:48107 528.51471:10946 546.52704:44246	0	0	118530	74804	0	0	30614	77547	34875	81281	107124	114158	145168	32844	147903	145684	93113	0	7685	170322	176361	240031	262932	303582
Chenodeoxycholic acid 24-acyl-.beta.-D-glucuronide	lvl 2A	6.453	567.316	MS & library MS/MS match	[M-H]-	HILIC-	Bile Cluster 2	Steroidal glycosides	ZTJBLIAPAIPNJE-BWGRGVIUSA-N	C[C@H](CCC(=O)O[C@H]1[C@@H]([C@H]([C@@H]([C@H](O1)C(=O)O)O)O)O)[C@H]2CC[C@@H]3[C@@]2(CC[C@H]4[C@H]3[C@@H](C[C@H]5[C@@]4(CC[C@H](C5)O)C)O)C	567.3158:297304 568.31915:111475 569.32251:24670	59.01217:15800 62.46243:2863 71.01213:5535 74.08444:2482 75.00764:2610 85.02795:36829 95.012:11626 99.00687:4030 103.00206:5307 113.02271:110698 123.86903:2582 129.01733:3231 131.03366:2596 131.80542:2810 133.01233:4966 156.10895:2566 175.02351:39967 193.03401:15956 218.92204:2641 385.56442:2467 391.28394:65084 510.37897:2641 567.31512:47133	0	0	35753	75169	37102	18091	46355	51580	48642	189823	179842	71401	78626	28136	49368	90726	24157	20147	1346	17486	43652	57279	66186	76928
Guanosine-3',5'-cyclic monophosphate	lvl 2A	8.479	344.039	MS & library MS/MS match	[M-H]-	HILIC-	Bile Cluster 2	Cyclic purine nucleotides	ZOOGRGPOEVQQDX-UUOKFMHZSA-N	C1[C@@H]2[C@H]([C@H]([C@@H](O2)N3C=NC4=C3N=C(NC4=O)N)O)OP(=O)(O1)O	344.03894:749341 345.04229:92379 346.04565:6573	90.43192:2236 95.02483:2205 133.01389:46428 135.36028:2417 139.49393:2711 145.078:2385 150.04054:463943 344.03885:29268	0	0	0	18636	68050	10834	9577	27993	29170	17679	13284	7176	26445	25204	75586	51379	1023	4251	11656	48773	17949	21528	22389	29159
L-Histidinol	lvl 2A	8.544	142.098	MS & library MS/MS match	[M+H]+	HILIC+	Bile Cluster 2	Amines	ZQISRDCJNBUVMM-UHFFFAOYSA-N	C1=C(NC=N1)CC(CO)N	142.09795:2659268 143.1013:227789 144.10466:0	60.04448:2585 70.06514:3000 81.04492:104092 83.06045:12970 86.09637:7813 95.06064:31782 96.05241:12186 96.15937:5276 107.06046:5174 113.96391:10522 120.31815:2184 124.08727:164236 125.0712:23016 131.97443:5262 142.05005:2608 142.08624:3894 142.09795:66878 142.12312:8874	0	0	0	0	0	0	10465	26587	4654	14482	143719	169768	138629	50375	26710	19687	4469	4174	0	0	103506	118453	117034	132727
N-Acetyl-D-galactosaminitol	lvl 2A	7.392	224.113	MS & library MS/MS match	[M+H]+	HILIC+	Bile Cluster 2	Carbohydrates and carbohydrate conjugates	DWAICOVNOFPYLS-OSMVPFSASA-N	CC(=O)N[C@@H](CO)[C@H]([C@H]([C@@H](CO)O)O)O	224.11346:1191121 225.11681:136543 226.12017:102540	55.0183:8756 55.47553:2126 56.0499:26970 59.39594:2536 60.04473:115654 60.14013:2600 68.05003:2579 69.03373:17796 72.04472:12302 73.02872:2621 74.10741:2169 78.2358:2036 80.04976:10859 81.03374:14596 81.44006:2256 82.06551:5124 83.04932:20276 84.04456:17203 85.02882:13658 86.06039:5455 86.92799:1980 87.18867:2098 90.05537:4389 96.04453:4267 98.06046:15099 99.04429:9489 100.07584:3575 102.05529:23…	21430	36693	59536	596255	143659	287939	355135	832238	504718	929168	742352	1042902	1191121	631777	876563	1629224	343617	338713	308227	588203	460892	507955	509146	476248
N-Acetylglucosaminylasparagine	lvl 2A	9.688	334.125	MS & library MS/MS match	[M-H]-	HILIC-	Bile Cluster 2	Amino acids, peptides, and analogues	YTTRPBWEMMPYSW-VFFCQLMOSA-N	CC(=O)N[C@@H]1[C@H]([C@@H]([C@H](O[C@H]1NC(=O)CC(C(=O)O)N)CO)O)O	334.12451:296090 335.12786:52591 336.13122:6763	59.01227:2300 61.07374:1996 78.22263:2021 85.56705:2009 85.88755:2093 92.79388:2030 96.00742:21960 97.64232:2039 99.055:7963 103.69954:1961 111.05561:2880 113.0341:92320 137.03441:3426 154.06058:4964 179.04472:24730 196.07149:68142 214.08202:34448 316.11429:25317 334.12476:18881	1038	651	56372	47430	10009	22475	45154	75213	102076	111849	96621	85012	122013	57713	169959	191475	49191	46676	36763	234900	79070	92066	101511	138469
NAGly 42:5|NAGly 18:1/24:4	lvl 2A	5.459	698.575	MS & library MS/MS match	[M+H]+	CSH+	Bile Cluster 2		JSSLAZGXLDWTPG-BVSYYLOWNA-N	OC(=O)CN%20.CC/C=C\C/C=C\C/C=C\C/C=C\CCC%10CCCCCCCC(=O)%20.CCCCCCCC/C=C\CCCCCCCC(=O)O%10	698.5744:957614 699.57775:445491 700.58111:121469	76.0395:52522 77.504:2972 81.0703:4349 85.06519:4827 86.31986:2953 95.08556:7158 100.9325:2789 107.08545:4535 109.10153:4459 121.10168:10589 135.11708:6448 147.11699:4139 149.13255:14072 158.08086:4081 161.13269:4754 163.14879:4579 177.12776:4946 187.14752:4055 213.16386:6259 231.17404:3629 241.19481:4551 323.27399:55280 341.28629:43658 346.54468:3141 416.31726:151249 450.21317:3214 684.74396:3203	0	0	5622	104018	5814	0	143780	612008	180532	421404	1297309	1314490	220884	126359	957614	212494	102769	0	0	0	374325	404132	484151	536386
Oleoyl-L-carnitine	lvl 2A	3.289	426.359	MS & library MS/MS match	[M+H]+	HILIC+	Bile Cluster 2	Fatty acid esters	IPOLTUVFXFHAHI-WHIOSMTNSA-N	CCCCCCCC/C=C\CCCCCCCC(=O)O[C@H](CC(=O)[O-])C[N+](C)(C)C	426.35873:5052914 427.36208:1413879 428.36544:192852	51.43121:3044 55.05465:6404 57.03382:32234 57.0703:39537 58.06538:3852 60.0811:354962 67.05447:14662 69.07012:37487 71.08573:27486 74.2307:3476 79.05404:3556 81.07018:33690 83.08573:33613 85.02857:2629874 85.10144:17678 93.07027:7312 93.39482:3346 95.08583:49897 97.065:13689 97.10163:34244 103.03946:4772 107.08541:11561 109.1013:31100 111.08089:4361 111.11713:17529 121.10141:27788 123.11667:6044 …	0	0	268954	383548	153500	32896	146925	214875	867355	2614802	3876631	2518116	2105144	724388	3649310	5052914	679510	276848	6273	289704	901438	951243	932408	840293
Phe-His	lvl 2A	8.743	303.146	MS & library MS/MS match	[M+H]+	HILIC+	Bile Cluster 2	Amino acids, peptides, and analogues	OHUXOEXBXPZKPT-STQMWFEESA-N	C1=CC=C(C=C1)C[C@@H](C(=O)N[C@@H](CC2=CN=CN2)C(=O)O)N	303.14597:823127 304.14932:155183 305.15268:0	52.93238:2111 78.03986:2356 83.06044:3548 95.0606:5271 110.07153:174488 112.08698:3293 120.08099:72387 138.06636:2705 140.724:3075 151.86406:2119 156.07718:470140 166.06194:29706 173.06801:2313 200.27975:2201 212.11867:16948 241.14636:3999 257.14008:28158 268.10852:17349 285.13531:86989 303.14615:133549	0	0	0	151571	14056	21642	192120	313309	126587	108020	98203	341420	204969	163669	390058	169687	20263	13508	118714	208883	162665	168495	168490	216836
Resveratrol-3-O-sulfate	lvl 2A	0.976	307.027	MS & library MS/MS match	[M-H]-	HILIC-	Bile Cluster 2		DULQFFCIVGYOFH-OWOJBTEDSA-N	C1=CC(=CC=C1/C=C/C2=CC(=CC(=C2)OS(=O)(=O)O)O)O	307.02673:624084 308.03008:151688 309.03344:195561	53.17007:1995 79.95574:3256 85.11422:2054 94.76426:2477 164.63086:2304 168.81268:2196 199.19431:4841 212.04643:2949 225.81523:2333 227.03447:15725 227.06985:547534 306.98749:4918 307.02658:112995	0	9297	79848	227687	31693	13707	21753	180986	241271	377171	547741	480698	749673	545928	654416	927163	62570	22789	13012	34750	246255	319458	436208	425264
SPB 18:0;2O	lvl 2A	1.494	302.307	MS & library MS/MS match	[M+H]+	CSH+	Bile Cluster 2	Amines	OTKJDMGTUTTYMP-UHFFFAOYNA-N	CCCCCCCCCCCCCCCC(O)C(N)CO	302.30652:650362 303.30987:148499 304.31323:0	81.07014:11510 83.08601:3639 92.44182:2360 95.08572:15050 97.10102:4920 100.16904:2380 108.51544:2187 109.10178:4972 202.55919:3842 240.26936:3919 242.25119:2182 254.28545:17943 266.28561:17797 284.29599:107004 302.1416:41812 302.30661:84820	59538	48892	72500	144249	124425	59912	130846	147245	83397	341393	430690	650362	643946	174294	170503	586258	210356	109185	61536	159988	221124	191470	101694	94475
S-succinylcysteine	lvl 2A	9.333	238.039	MS & library MS/MS match	[M+H]+	HILIC+	Bile Cluster 2	Amino acids, peptides, and analogues	XPKKFTKCRVIDAG-UHFFFAOYSA-N	C(C(C(=O)O)SCC(C(=O)O)N)C(=O)O	238.03865:511146 239.042:43442 240.04536:0	51.50249:2140 55.01824:3175 68.78141:2125 73.0285:17833 76.59538:2168 78.60876:1997 99.00784:2928 102.98474:10556 105.00046:3486 114.42329:2176 120.99574:35562 131.72168:2253 132.01157:3865 148.99081:49123 151.20175:2158 156.01151:8706 167.00153:3733 174.02208:11827 184.00674:19801 192.03294:20698 197.78989:2813 197.80736:5618 202.01732:49726 203.00169:9328 207.07681:1928 220.02829:2644 221.01231…	0	0	0	192747	140001	108396	177622	144169	113984	511146	288370	447086	493681	73807	154096	305601	107727	5842	0	32404	115963	124083	132388	130044
Thymine	lvl 2A	2.833	127.05	MS & library MS/MS match	[M+H]+	HILIC+	Bile Cluster 2	Pyrimidines and pyrimidine derivatives	RWQNBRDOKXIBIV-UHFFFAOYSA-N	CC1=CNC(=O)NC1=O	127.05055:730679 128.0539:14808 129.05726:0	56.04995:2116 84.04443:19012 87.87552:1814 109.03987:19930 110.02386:65867 127.05051:211587	0	0	0	17540	4836	0	88716	355272	257588	166638	92496	521932	444853	105564	392398	214517	50441	10966	0	484152	338161	330457	308767	287715
1-Kestose	lvl 2A	9.447	549.166	MS & library MS/MS match	[M+HCO2]-	HILIC-	Food Cluster 1	Carbohydrates and carbohydrate conjugates	VAWYEUIPHLMNNF-OESPXIITSA-N	C([C@@H]1[C@H]([C@@H]([C@H]([C@H](O1)O[C@]2([C@H]([C@@H]([C@H](O2)CO)O)O)CO[C@]3([C@H]([C@@H]([C@H](O3)CO)O)O)CO)O)O)O)O	549.16571:24807398 550.16906:6261398 551.17242:1662011	51.44376:3914 51.48534:2831 56.62252:3053 57.03286:5137 58.00442:5373 59.01227:733533 61.0779:2737 63.14735:2710 63.18339:2925 70.79408:3558 71.01225:560154 72.99149:13438 73.02771:19274 83.01205:15347 85.02795:67407 87.00717:40785 89.0228:702229 95.0123:39788 99.00712:12275 101.02279:407229 113.02279:414857 119.0334:235482 125.02259:7730 131.0334:58960 133.01245:7652 137.98256:2908 143.03331:123…	35168	11615	798	178692	228375	30950	23583	643495	917619	765863	1835384	3355756	7190411	4647578	2409857	1486026	1606	0	0	13678	1055551	1509745	1538617	1776996
3,4-Dihydroxyhydrocinnamic acid	lvl 2A	1.866	181.049	MS & library MS/MS match	[M-H]-	HILIC-	Food Cluster 1		DZAUWHJDUNRCTF-UHFFFAOYSA-N	C1=CC(=C(C=C1CCC(=O)O)O)O	181.04903:1234470 182.05238:117964 183.05574:74781	50.00385:2234 50.82934:2487 54.18991:1945 59.01224:153414 65.13369:2073 66.65306:1835 67.00561:2337 69.98688:2562 71.01217:2251 89.0227:2769 93.03297:2024 95.04861:4789 101.02254:2388 107.04818:2896 109.02788:44108 109.06409:26789 119.04842:27960 121.02782:47755 122.03533:11528 135.04337:31002 137.05907:254886 140.21021:2312 166.04607:3197 181.04915:179757 181.06844:9930	90580	43710	1178	483800	18456	27875	17239	784801	442206	266522	544186	1234470	1665662	560159	576895	582830	22236	53629	37849	49557	366952	410744	433835	424097
3-Hydroxyacetaminophen	lvl 2A	1.876	166.049	MS & library MS/MS match	[M-H]-	HILIC-	Food Cluster 1	Anilides	IPFBMHOMTSBTSU-UHFFFAOYSA-N	CC(=O)NC1=CC(=C(C=C1)O)O	166.04936:824714 167.05271:69263 168.05607:0	52.22264:1799 55.10125:1864 58.02813:3186 63.37534:1993 122.03146:2571 123.03088:27022 124.03868:205924 166.0493:388597	3214	2860	14781	10905	824714	22878	10333	82419	18889	25075	29082	24041	36705	21871	18110	20103	13548	8003	5279	7411	25322	31130	32849	35483
4,4-Dimethyl-L-glutamic acid	lvl 2A	8.197	174.076	MS & library MS/MS match	[M-H]-	HILIC-	Food Cluster 1	Amino acids, peptides, and analogues	HDVPVAJBJJYYBO-BYPYZUCNSA-N	CC(C)(C[C@@H](C(=O)O)N)C(=O)O	174.07565:313998 175.079:24085 176.08236:0	59.16972:2184 128.07025:3520 130.08574:76536 155.94557:2774 156.06497:79300 174.07579:38584 174.09244:3355	830	543	0	11208	4841	3965	16112	321043	625356	422516	1587336	1921218	1608728	232892	126943	83752	13268	17004	1785	8357	286806	397245	351941	400888
4-Ketopimelic acid	lvl 2A	3.737	173.044	MS & library MS/MS match	[M-H]-	HILIC-	Food Cluster 1	Medium-chain keto acids and derivatives	UDDSEESQRGPVIL-UHFFFAOYSA-N	C(CC(=O)O)C(=O)CCC(=O)O	173.04399:466767 174.04734:27002 175.0507:33659	59.01228:9571 73.02812:2261 82.28082:1852 83.04852:2592 85.06417:32737 93.03296:2904 111.0435:45198 129.05408:60999 129.06436:3814 136.86035:2009 137.02287:11151 150.62024:1925 155.03304:16975 173.04384:39419 173.08066:2510	22230	21576	18647	54558	55434	42483	50227	207369	243013	95630	186178	194524	388449	313071	194664	110616	15106	19529	17905	22770	91560	122191	115725	132449
5-Methylcytosine	lvl 2A	5.863	126.066	MS & library MS/MS match	[M+H]+	HILIC+	Food Cluster 1	Pyrimidines and pyrimidine derivatives	LRSASMSXMSNRBT-UHFFFAOYSA-N	CC1=C(NC(=O)N=C1)N	126.06653:426138 127.06988:45883 128.07324:23954	55.75763:1808 62.01408:1635 62.23554:2001 63.69992:1868 83.06036:11788 108.05563:3829 109.03993:14825 126.05587:15422 126.06642:242928	0	0	4576	19495	48079	59386	376988	191292	113428	53197	281226	2483831	2219351	619417	1184014	689485	12784	0	0	69764	744511	742554	685428	724330
Cytosine	lvl 2A	6.128	112.051	MS & library MS/MS match	[M+H]+	HILIC+	Food Cluster 1	Pyrimidines and pyrimidine derivatives	OPTASPLRGRRNAP-UHFFFAOYSA-N	C1=C(NC(=O)N=C1)N	112.05079:1739320 113.05414:86566 114.0575:72568	50.36533:1953 50.67622:1994 64.95577:1948 69.04495:26639 94.04014:9190 95.01797:2605 95.02421:73188 112.0508:565734 112.09557:17209	8091	19485	39487	545754	212375	219845	1693806	4783800	2623128	917222	1098978	7725604	6176916	2316764	4545938	2712508	280469	318279	63599	1121473	2440043	2375090	2428842	2464847
DG 34:0|DG 16:0_18:0	lvl 2A	7.636	614.575	MS & library MS/MS match	[M+NH4]+	CSH+	Food Cluster 1	Diacylglycerols	ONCLVQFEAFTXMN-UHFFFAOYNA-N	CCCCCCCCCCCCCCCCCC(=O)OC(CO)COC(=O)CCCCCCCCCCCCCCC	614.57465:2308016 615.578:888689 616.58136:207968	71.08593:44812 81.07026:25373 83.08579:19887 85.10145:36952 95.08585:34531 97.10137:19533 97.73282:2632 109.10172:20214 111.1171:4000 123.11729:15639 239.2395:5048 257.25021:3695 285.24438:3397 285.27881:3872 313.27487:187834 320.08218:2681 341.30652:174569 579.5376:165601 614.40839:19479	88868	66849	79884	85930	83471	30881	48105	458653	105023	139612	546300	256571	205917	505795	207986	196313	101855	36245	91145	127031	266014	358864	422870	485379
DG 36:0|DG 18:0_18:0	lvl 2A	8.269	642.606	MS & library MS/MS match	[M+NH4]+	CSH+	Food Cluster 1	Diacylglycerols	UHUSDOQQWJGJQS-UHFFFAOYNA-N	CCCCCCCCCCCCCCCCCC(=O)OCC(CO)OC(=O)CCCCCCCCCCCCCCCCC	642.6059:390616 643.60925:214837 644.61261:28319	71.08582:3394 78.34574:2847 95.0859:5392 201.52455:3967 317.50317:2913 319.68469:2838 341.30618:37120 409.77063:2822 495.89929:3003 607.56836:37610	29771	5758	7193	17579	80938	9519	17394	200296	81809	393374	3838680	1625049	1341980	1087807	603443	946394	60036	17483	62446	28658	258902	362864	432272	566155
DGDG 36:3|DGDG 18:1_18:2	lvl 2A	5.196	960.667	MS & library MS/MS match	[M+NH4]+	CSH+	Food Cluster 1	Glycosylglycerols	KCWRXTZCUNBOLH-RQOIEFAZNA-N	CCCCCCCC\C=C/CCCCCCCC(=O)OCC(COC1OC(COC2OC(CO)C(O)C(O)C2O)C(O)C(O)C1O)OC(=O)CCCCCCC\C=C/C\C=C/CCCCC	960.6662:558099 961.66955:454645 962.67291:122303	81.0701:27579 85.02872:4479 91.03929:4345 93.07031:5337 95.08598:24349 97.10172:9582 107.08561:4660 109.10149:8094 121.10148:6374 145.0507:4858 150.65909:3353 163.06042:7019 263.23727:7713 265.255:5873 337.27496:107727 339.29086:107554 556.50732:4902 601.52142:86734 619.52979:19095	0	0	0	0	0	0	0	82104	0	0	362364	393357	274681	589254	312503	250807	0	0	0	0	111283	136443	206735	178755
HexCer 34:0;4O|HexCer 18:0;3O/16:0;(2OH)	lvl 2A	4.645	734.581	MS & library MS/MS match	[M+H]+	CSH+	Food Cluster 1	Glycosphingolipids	YGQNMWJVCQBFGZ-UHFFFAOYNA-N	CCCCCCCCCCCCCCC(O)C(O)C(COC1OC(CO)C(O)C(O)C1O)NC(=O)C(O)CCCCCCCCCCCCCC	734.58063:1343920 735.58398:670367 736.58734:162874	71.08552:3280 75.76373:3095 81.06998:4485 83.08572:4625 86.0605:5605 95.08566:4021 113.17987:2748 120.6652:2632 135.11732:3608 252.26933:12561 254.28413:4294 264.26938:51202 265.2558:21441 270.28024:5534 272.25885:12352 282.2803:139276 300.2912:47405 314.27008:7513 491.50204:4052 518.49518:5122 536.50751:38483 554.51666:211361 572.52692:115459	0	0	10787	52877	16499	15789	87655	99097	105607	104399	107838	221190	313858	65890	425230	186935	15336	6893	6294	11331	109045	163637	177300	215080
HexCer 34:1;3O|HexCer 18:1;2O/16:0;O	lvl 2A	4.911	716.57	MS & library MS/MS match	[M+H]+	CSH+	Food Cluster 1	Glycosphingolipids	FMRHRMJAYYLKAI-BYCLXTJYNA-N	CCCCCCCCCCCCCCC(O)C(=O)NC(COC1OC(CO)C(O)C(O)C1O)C(O)\C=C\CCCCCCCCCCCCC	716.56952:5124972 717.57287:3321938 718.57623:809309	71.08578:5515 79.02998:3389 79.05437:7179 81.06989:15037 82.06519:8033 83.08572:7139 85.02909:3437 93.07027:7404 95.08599:17660 96.08142:3182 97.10139:15463 100.05193:2853 106.48218:3387 109.10152:7339 121.101:7937 135.11707:13456 146.52693:2953 196.9245:16350 246.15184:3027 247.242:11405 252.26944:144260 254.24902:3761 264.26953:879885 266.2851:6239 272.25961:31943 282.28006:69930 308.27991:2870…	124989	110708	835371	3244492	1181067	1417171	4060714	5014671	4424829	1996670	2049458	6608983	8468700	2894122	9006637	2164094	1229589	402207	117449	348550	4894510	5327370	7379138	7739756
HexCer 40:0;4O|HexCer 18:0;3O/22:0;(2OH)	lvl 2A	6.637	818.675	MS & library MS/MS match	[M+H]+	CSH+	Food Cluster 1	Glycosphingolipids	YTAGQSULOHKBPZ-UHFFFAOYNA-N	CCCCCCCCCCCCCCCCCCCCC(O)C(=O)NC(COC1OC(CO)C(O)C(O)C1O)C(O)C(O)CCCCCCCCCCCCCC	818.67523:1447864 819.67858:1110687 820.68194:294162	72.74341:3248 83.08562:4298 85.10194:3638 86.06033:7896 88.49552:3345 93.07049:4800 97.10143:4324 101.51488:3507 150.49448:3418 159.4648:3074 202.58063:4864 252.26828:20090 264.26959:92512 265.25375:27061 270.28033:14626 282.28027:168872 300.29065:55811 306.1936:3372 356.35501:16416 398.36249:4164 579.80249:3576 602.5882:6817 620.60144:56615 638.61053:295630 647.90198:3737 656.62177:137540	0	0	0	8842	0	9786	60661	140239	117118	92171	83165	148531	140775	41588	370588	103049	7414	0	0	0	102020	104133	160421	154390
HexCer 40:1;3O|HexCer 18:1;2O/22:0;O	lvl 2A	6.913	800.665	MS & library MS/MS match	[M+H]+	CSH+	Food Cluster 1	Glycosphingolipids	KYIWQDXUFOGPKU-NWBJSICCNA-N	CCCCCCCCCCCCCCCCCCCCC(O)C(=O)NC(COC1OC(CO)C(O)C(O)C1O)C(O)\C=C\CCCCCCCCCCCCC	800.66492:3860057 801.66827:2079579 802.67163:684966	71.08563:4433 74.31365:3102 79.05444:7260 81.07001:20562 81.83855:3313 82.06519:18996 83.08581:17131 85.02856:4131 91.75629:3030 93.06998:13385 95.0858:30914 97.10146:8201 107.08579:5000 109.10176:7076 121.10136:18146 131.92648:3710 135.11702:14990 216.38652:3459 224.2372:8303 236.23849:61501 247.24214:15020 250.25349:23056 252.23953:4064 252.26982:157300 264.26974:1040939 266.28519:7837 282.2802…	0	0	0	84972	7880	11708	65820	301907	360748	264703	119436	283113	333930	130222	662122	135878	82992	0	0	10799	194834	281036	364282	408468
HexCer 41:0;4O|HexCer 18:0;3O/23:0;(2OH)	lvl 2A	6.972	832.691	MS & library MS/MS match	[M+H]+	CSH+	Food Cluster 1	Glycosphingolipids	MIGCGSNMPJICKZ-UHFFFAOYNA-N	CCCCCCCCCCCCCCCCCCCCCC(O)C(=O)NC(COC1OC(CO)C(O)C(O)C1O)C(O)C(O)CCCCCCCCCCCCCC	832.6908:982508 833.69415:569003 834.69751:163118	70.43766:3110 79.05427:3454 86.06007:6320 93.07024:4981 100.75689:3301 114.93791:3226 121.52213:3202 144.78027:3391 190.8508:3700 202.57446:5310 252.26968:17685 264.26929:60285 265.25333:18095 270.27957:5981 282.28021:121737 300.29108:48257 370.36862:8121 412.37656:4401 601.58411:3879 616.5993:6422 634.61493:56450 652.62628:260184 670.63818:102267	0	0	0	6060	0	0	11016	134247	59643	66960	15148	107248	75020	23081	306218	40297	0	0	7110	0	53636	99124	71925	100624
HexCer 42:0;4O|HexCer 18:0;3O/24:0;(2OH)	lvl 2A	7.301	846.707	MS & library MS/MS match	[M+H]+	CSH+	Food Cluster 1	Glycosphingolipids	ODTUNRBWGNXHMQ-UHFFFAOYNA-N	CCCCCCCCCCCCCCCCCCCCCCC(O)C(=O)NC(COC1OC(CO)C(O)C(O)C1O)C(O)C(O)CCCCCCCCCCCCCC	846.70691:2121882 847.71026:1003764 848.71362:331261	71.08588:3934 72.0445:4859 79.05448:3770 81.07015:7042 83.08601:8051 86.06049:7447 90.05517:7332 93.0702:8445 95.08599:8239 97.10139:5983 98.38055:3467 107.54253:3488 121.10152:6875 149.13251:3449 252.26944:28528 254.28705:4672 264.26965:122795 265.254:38934 270.27979:8141 282.28021:274932 300.29111:75024 301.79993:3793 310.31119:6562 318.30322:4761 384.38583:22185 426.39688:7205 630.61841:19794 …	0	0	55410	158683	39041	18936	121009	172615	171882	164842	132433	299423	365102	119872	642685	227036	37507	7718	0	6282	135281	203251	242812	291276
HexCer 42:1;3O|HexCer 18:1;2O/24:0;O	lvl 2A	7.564	828.696	MS & library MS/MS match	[M+H]+	CSH+	Food Cluster 1	Glycosphingolipids	ZXWQZGROTQMXME-JMUUFCRMNA-N	CCCCCCCCCCCCCCCCCCCCCCC(O)C(=O)NC(COC1OC(CO)C(O)C(O)C1O)C(O)\C=C\CCCCCCCCCCCCC	828.69598:922511 829.69933:521198 830.70269:132073	73.9029:3084 81.07023:3823 82.06556:3809 90.97702:4229 95.08591:5054 118.91092:3405 121.10204:5173 133.52359:3673 136.47583:3000 137.27736:2982 142.97604:3308 156.45146:4136 226.95265:4593 243.24654:3724 252.26932:64218 264.26971:341963 272.26233:3561 282.28082:35927 292.30313:4485 304.19949:4405 366.37564:4951 384.38696:6202 456.40335:3431 477.97284:3418 533.73444:3323 618.62042:16595 630.62189:…	11695	0	83935	243873	22337	21460	167534	376827	410725	282838	159933	440972	539009	191634	749762	211938	127772	22002	0	29851	225705	337582	509205	514088
His-Thr	lvl 2A	9.59	257.125	MS & library MS/MS match	[M+H]+	HILIC+	Food Cluster 1	Amino acids, peptides, and analogues	WRPDZHJNLYNFFT-DTLFHODZSA-N	C[C@H]([C@@H](C(=O)O)NC(=O)[C@H](CC1=CN=CN1)N)O	257.12494:497062 258.12829:38122 259.13165:0	58.10263:2226 93.04459:2517 106.51534:2080 110.07156:304449 131.15428:2289 138.06633:13855 156.0769:33277 166.09787:5010 195.08748:4674 211.11986:2729 239.11441:81542 257.12479:71481	0	9114	137313	404895	79419	134470	390996	549016	291387	330086	437027	2781334	2661918	691588	434317	397678	202551	68176	54399	184711	362039	343815	413835	347419
L-Saccharopine	lvl 2A	9.895	277.14	MS & library MS/MS match	[M+H]+	HILIC+	Food Cluster 1	Amino acids, peptides, and analogues	ZDGJAHTZVHVLOT-YUMQZZPRSA-N	C(CCN[C@@H](CCC(=O)O)C(=O)O)C[C@@H](C(=O)O)N	277.14023:920593 278.14358:134144 279.14694:0	67.45597:2041 70.44019:2102 84.08102:248477 85.42038:2072 130.08665:159843 135.01869:2314 171.30612:2314 180.04396:2108 195.11356:16448 206.33948:2301 213.1239:115991 214.10765:4160 231.13525:4799 259.06516:4483 259.12967:55182 277.07608:3811 277.13956:77511	0	0	0	0	0	0	0	12462	5110	10118	116253	937570	1460717	227243	86629	65390	0	0	0	0	32504	41187	53228	19364
MGDG 36:3|MGDG 18:1_18:2	lvl 2A	5.685	798.612	MS & library MS/MS match	[M+NH4]+	CSH+	Food Cluster 1	Glycosylglycerols	WJVJJQWZSIYMIV-RQOIEFAZNA-N	CCCCCCCC\C=C/CCCCCCCC(=O)OCC(COC1OC(CO)C(O)C(O)C1O)OC(=O)CCCCCCC\C=C/C\C=C/CCCCC	798.61169:927397 799.61504:579569 800.6184:119530	71.08575:5039 81.0704:32894 83.08576:27210 86.09646:19430 93.07025:7149 95.08587:37930 96.48921:3361 97.1013:16685 107.08562:3921 109.10163:23134 121.10152:6005 122.20634:3433 123.11719:6589 125.00018:7763 135.11734:14059 137.13312:3507 149.13208:3635 161.13289:4585 162.95592:4225 178.21832:3381 180.37105:2960 184.05592:5777 184.07408:162909 263.23767:7120 337.2753:130813 339.29044:137407 601.521…	0	0	0	0	6581	0	0	38362	0	0	96165	13243	0	161836	9273	12987	0	7310	0	0	27036	55710	79445	78469
N-Acetyl-L-phenylalanine	lvl 2A	2.595	206.081	MS & library MS/MS match	[M-H]-	HILIC-	Food Cluster 1	Amino acids, peptides, and analogues	CBQJSKKFNMDLON-UHFFFAOYSA-N	CC(=O)NC(CC1=CC=CC=C1)C(=O)O	206.0809:3987120 207.08425:437393 208.08761:20688	52.84417:2097 58.02822:227317 70.02821:108080 72.00735:14636 91.04749:4952 91.05366:122012 92.82298:2191 103.7051:2365 117.2271:2166 132.60892:2190 135.04353:5092 147.04353:247253 162.09109:12566 164.07007:885363 199.96233:5701 206.08086:354593	18281	10013	104382	86258	24154	13056	23570	739003	323772	271244	672550	825979	1090556	1084629	420904	304841	61073	34427	4397	16143	347820	365058	405106	421652
N-Carboxyethyl-.gamma.-aminobutyric acid	lvl 2A	8.25	176.092	MS & library MS/MS match	[M+H]+	HILIC+	Food Cluster 1	Amino acids, peptides, and analogues	SRGQUICKDUQCKO-UHFFFAOYSA-N	C(CC(=O)O)CNCCC(=O)O	176.09224:4322531 177.09559:421653 178.09895:0	50.58:2933 54.27988:3403 60.389:2474 66.90512:2106 70.0654:18600 72.0445:20582 86.06024:5899 87.04427:714462 90.05517:208158 98.06027:749484 112.07587:43380 116.07087:966940 118.08637:9539 130.08696:21157 140.07095:320486 141.66132:2424 152.52913:2627 158.08151:26836 176.09218:1160327	0	0	0	154699	182668	106898	229289	552266	310918	454195	2100757	16844204	21403400	4322531	1951106	1465968	16788	6445	0	4919	740559	778920	809044	855418
PyroGlu-Met	lvl 2A	6.57	261.091	MS & library MS/MS match	[M+H]+	HILIC+	Food Cluster 1	Amino acids, peptides, and analogues	FKWGLFXEKQAERS-UHFFFAOYSA-N	CSCCC(C(=O)O)NC(=O)C1CCC(=O)N1	261.09116:2718018 262.09451:338104 263.09787:138865	50.63933:2183 53.53076:2080 56.04988:74463 56.05282:5044 61.01108:28321 74.06005:2192 84.04461:266106 95.41404:2340 102.0551:12384 104.04519:4672 104.0531:142077 114.37312:2458 122.06:9858 130.05031:36984 133.03214:101372 139.08672:3862 150.05873:411545 156.79379:2119 161.71178:2397 167.08199:404307 185.09235:2892 195.07793:17542 198.2645:2805 198.28185:5118 213.08757:268015 215.08533:49321 243.0…	104318	106654	0	239506	99026	150831	255267	727190	343223	577975	2718018	9720679	8276140	1330654	1300765	1217100	31120	0	0	0	949886	894429	934870	916330
PyroGlu-Trp	lvl 2A	6.071	316.13	MS & library MS/MS match	[M+H]+	HILIC+	Food Cluster 1	Amino acids, peptides, and analogues	QMMASWWWQRGQQC-UHFFFAOYSA-N	C1CC(=O)NC1C(=O)NC(CC2=CNC3=CC=CC=C32)C(=O)O	316.13004:442166 317.13339:114156 318.13675:0	62.04353:2558 72.96152:2113 84.04471:23048 101.01717:2507 125.07132:5001 130.06552:87767 132.02466:2588 132.08128:38931 139.05078:11538 144.08095:5078 146.06067:12005 153.06622:14646 159.0921:18101 170.06042:8129 187.0881:17604 188.07106:144994 199.83037:8372 205.09755:58217 225.10336:11173 253.09862:4804 270.12448:83576 280.10925:9116 285.07202:2553 298.11951:12275 316.12582:44113 316.16797:3670	0	0	12882	25801	20721	36778	65912	218887	166616	66874	353484	414592	457916	509490	501139	339584	5728	60434	0	97352	143106	167204	183739	178023
SHexCer 34:1;3O|SHexCer 18:1;2O/16:0;O	lvl 2A	4.095	796.528	MS & library MS/MS match	[M+H]+	CSH+	Food Cluster 1	Glycosphingolipids	RJBWNINOBUDIFT-BYCLXTJYNA-N	CCCCCCCCCCCCCCC(O)C(=O)NC(COC1OC(CO)C(O)C(OS(O)(=O)=O)C1O)C(O)\C=C\CCCCCCCCCCCCC	796.52759:1274832 797.53094:677321 798.5343:175942	82.06567:3959 85.64288:2996 93.07134:3979 110.87436:3161 121.10172:3844 133.65269:3097 135.11726:4365 148.77647:3178 217.6913:3698 247.24394:4604 252.26958:55846 264.26968:357326 272.25998:13398 282.28036:25292 380.12531:3930 381.97742:3129 506.49301:19665 518.49518:113158 520.50977:14520 536.5061:70454 698.56061:67397	0	0	0	38131	0	0	30924	107383	108897	107435	117690	279142	305210	101647	377155	246358	6561	5867	0	11384	125176	136287	137144	166932
SHexCer 42:1;3O|SHexCer 18:1;2O/24:0;O	lvl 2A	6.39	908.654	MS & library MS/MS match	[M+H]+	CSH+	Food Cluster 1	Glycosphingolipids	QTTLKKFUOJQIRB-JMUUFCRMNA-N	CCCCCCCCCCCCCCCCCCCCCCC(O)C(=O)NC(COC1OC(CO)C(O)C(OS(O)(=O)=O)C1O)C(O)\C=C\CCCCCCCCCCCCC	908.65411:942842 909.65746:654502 910.66082:201277	80.48311:4232 81.0699:4850 95.08562:4941 115.31058:3569 252.26968:57406 264.26956:332233 275.72891:3478 282.27985:24866 311.95999:4253 366.37311:5267 384.3844:6727 436.966:3639 618.61389:19407 630.62067:129911 632.63336:18873 642.87:4037 648.6322:66958 731.94281:3774 810.68536:69852	0	0	0	12510	0	0	12830	69896	60331	66203	75930	127246	137151	32505	250556	122396	6270	0	0	11813	39256	64168	102558	96589
2-Propylglutaric acid	lvl 2A	3.652	173.08	MS & library MS/MS match	[M-H]-	HILIC-	Food Cluster 2	Fatty acids and conjugates	IFNXFIJXYVEYLF-UHFFFAOYSA-N	CCCC(CCC(=O)O)C(=O)O	173.08038:1532731 174.08373:140160 175.08709:6311	57.03009:2939 57.03299:62858 59.01223:25153 67.80119:2107 67.97837:2248 75.79503:2180 84.08926:2346 107.21268:2246 111.04333:1964 111.07983:22598 113.05905:2469 125.05887:3045 127.07464:29056 129.09048:28513 136.86093:11243 137.05896:2766 138.85793:2928 154.94588:2570 155.06953:25471 164.74022:2232 166.59859:1985 171.06474:8432 172.84131:2349 173.08031:701649	22957	20634	17483	219562	482258	361384	464462	217612	31144	24970	36223	50428	76278	37922	30504	27695	18458	18975	14895	21235	129317	156221	155722	175315
3-Methylcytidine	lvl 2A	7.213	258.109	MS & library MS/MS match	[M+H]+	HILIC+	Food Cluster 2		RDPUKVRQKWBSPK-ZOQUXTDFSA-N	CN1C(=N)C=CN(C1=O)[C@H]2[C@@H]([C@@H]([C@H](O2)CO)O)O	258.10934:442865 259.11269:31831 260.11605:0	55.61069:1844 61.97421:1948 114.39622:2589 126.06654:338033 190.57289:2076	0	0	0	151308	90531	225723	442865	290122	185194	194457	183735	194965	267705	104577	138476	192248	52956	18237	14778	203397	154336	152742	161120	160484
4,6-Diamino-5-formamidopyrimidine	lvl 2A	5.475	154.073	MS & library MS/MS match	[M+H]+	HILIC+	Food Cluster 2	Pyrimidines and pyrimidine derivatives	MVYUVUOSXNYQLL-UHFFFAOYSA-N	C1=NC(=C(C(=N1)N)NC=O)N	154.07271:647167 155.07606:25762 156.07942:0	59.58707:2197 76.16694:1940 78.50739:2231 97.44997:2158 101.77644:2074 105.01093:2097 109.05215:4674 117.08148:2272 126.07771:143552 136.06215:50897 137.06024:3181 154.05075:92094 154.07262:196553 154.08482:7367 154.12274:12265	0	0	0	21521	146621	130491	118016	53702	5401	0	0	79809	86225	46589	20470	19717	6052	11202	0	0	65929	53324	48652	50740
4-Aminophenol	lvl 2A	1.382	110.06	MS & library MS/MS match	[M+H]+	HILIC+	Food Cluster 2	Aniline and substituted anilines	PLIKAWJENQZMHA-UHFFFAOYSA-N	C1=C(C=CC(=C1)O)N	110.06029:1521265 111.06364:132773 112.067:29036	56.80471:1912 59.0512:1848 65.03886:66985 66.85091:1917 67.05458:2495 67.24067:1900 82.06515:24054 92.04963:44593 93.03378:16750 109.05234:2866 110.0603:621104	18328	53292	444472	1770989	9764808	1521265	470063	978397	901656	1092822	1979946	2867085	3183503	2685178	2224000	2611775	306048	216209	104908	208905	1865564	1817267	1953018	1900105
Acetaminophen sulfate	lvl 2A	1.496	230.011	MS & library MS/MS match	[M-H]-	HILIC-	Food Cluster 2	Arylsulfates	IGTYILLPRJOVFY-UHFFFAOYSA-N	CC(=O)NC1=CC=C(C=C1)OS(=O)(=O)O	230.01151:327211 231.01486:46137 232.01822:24120	57.07679:2015 67.03516:1766 79.9557:12545 85.63256:2009 86.98999:2210 107.03623:2933 150.05434:367676 182.39124:2522 201.54718:2195 230.01158:163370	26998	33343	12754	28824	79110792	149918400	170978160	190030224	154324048	117650216	112816456	89463216	132504272	63843132	112152792	93846488	26913600	33589476	23518064	68701464	40345116	58101408	61756696	76034976
Arg-Ala	lvl 2A	9.732	246.157	MS & library MS/MS match	[M+H]+	HILIC+	Food Cluster 2	Amino acids, peptides, and analogues	WVRUNFYJIHNFKD-WDSKDSINSA-N	C[C@@H](C(=O)O)NC(=O)[C@H](CCCN=C(N)N)N	246.15685:4494700 247.1602:532734 248.16356:0	50.58315:2545 51.5316:2194 57.2431:2113 60.05598:220405 70.06535:658160 76.54329:2718 84.08104:10339 88.07585:8878 90.85814:2436 97.07613:12486 98.06033:5298 112.08722:111245 113.07122:3452 114.06641:40204 114.10288:4242 115.08702:35373 116.07095:24405 124.07584:3949 130.09811:4049 140.08249:17832 141.10274:5356 142.08586:2765 149.18224:2837 157.10884:45307 158.07922:4608 158.0928:60387 166.0979:…	428929	1823817	2085436	4245668	13112746	5205990	7163130	4527808	1480552	1488976	1535924	9673651	6885472	3250478	3503037	5498415	3965497	4390487	401371	494133	5218664	5221356	5811548	5260524
DL-Isocitric acid lactone	lvl 2A	8.09	173.008	MS & library MS/MS match	[M-H]-	HILIC-	Food Cluster 2	Tricarboxylic acids and derivatives	UKZDIMBDWHZXOK-UHFFFAOYSA-N	C1C(C(OC1=O)C(=O)O)C(=O)O	173.00764:24546154 174.01099:2179102 175.01435:372764	67.01728:4151 72.399:1962 72.99148:31572 83.01218:12965 85.02787:268679 99.0071:28896 101.0229:49507 111.0071:743849 118.46426:2188 129.01765:99219 135.92598:2554 154.99702:132280 173.00757:69509	23497	16278	14588	967734	4908860	1573015	3081632	1442679	99014	77219	201255	547893	1474911	362800	174175	125455	40191	31967	6625	16387	398459	554993	469556	552670
Glu-Ile-Lys	lvl 2A	9.31	389.241	MS & library MS/MS match	[M+H]+	HILIC+	Food Cluster 2	Amino acids, peptides, and analogues	XTZDZAXYPDISRR-UHFFFAOYSA-N	CCC(C)C(C(=O)NC(CCCCN)C(=O)O)NC(=O)C(CCC(=O)O)N	389.24063:1462204 390.24398:273961 391.24734:0	50.12332:2378 70.06564:2765 71.04107:2388 84.04444:23683 84.08101:154184 86.09663:139717 88.40902:2583 95.22298:2293 101.10774:9452 102.05519:29629 110.67194:2712 129.06644:47575 129.10263:150130 130.0867:220574 141.06633:2965 147.11322:328009 166.43353:2827 170.11806:20517 197.12909:120459 205.75601:2901 207.14778:2788 215.1398:213731 225.12292:5908 226.15466:2988 242.18758:5295 243.13477:14529 …	14637	28511	15478	81762	326203	234273	1462204	156235	8717	9652	0	375115	215218	277770	283642	508447	149361	28566	0	29426	224764	236266	219883	224238
Gly-Arg	lvl 2A	9.852	232.141	MS & library MS/MS match	[M+H]+	HILIC+	Food Cluster 2	Amino acids, peptides, and analogues	JLXVRFDTDUGQEE-YFKPBYRVSA-N	C(C[C@@H](C(=O)O)NC(=O)CN)CN=C(N)N	232.14108:3315482 233.14443:396315 234.14779:0	59.90013:2349 60.05597:84723 64.40942:2725 68.26945:2260 70.06534:196905 72.08101:21586 73.06495:4638 75.05547:19870 87.05547:3119 88.07545:3443 97.07652:4635 100.05078:180346 112.08715:60105 113.07146:21239 114.10316:4196 115.08692:77872 116.07089:178707 127.08661:19762 128.07051:3668 129.10236:28140 130.09792:10384 133.09764:2731 138.06645:4593 140.08188:13294 141.00092:15728 142.00433:18608 14…	0	99866	145541	536597	1487848	910068	1826586	658621	87240	209641	164329	4061397	2004505	865619	707843	996670	374878	206991	119681	217401	950420	855294	866447	943666
Gly-Leu-Arg	lvl 2A	8.92	345.225	MS & library MS/MS match	[M+H]+	HILIC+	Food Cluster 2	Amino acids, peptides, and analogues	NSTUFLGQJCOCDL-UHFFFAOYSA-N	CC(C)CC(C(=O)NC(CCCN=C(N)N)C(=O)O)NC(=O)CN	345.22549:2050308 346.22884:290393 347.2322:0	56.18825:2279 60.05594:52524 70.06538:71328 72.08098:5121 84.73139:2484 85.21624:2465 86.09661:94776 93.46945:2368 112.08724:38655 113.07104:6128 114.10278:9572 115.08715:32344 116.07089:71655 130.09787:19488 133.09706:4928 143.11829:281412 156.11362:13623 157.10864:9253 158.09285:134115 171.11325:66011 175.11942:383055 196.10951:2660 215.1143:14838 228.17004:3412 229.15784:3978 250.15488:4596 25…	0	40887	55388	48516	2050308	221228	189311	79050	0	5312	0	167367	101859	87906	104598	170045	46040	16397	0	58871	149653	159126	155416	182661
hesperidin	lvl 2A	5.661	609.181	MS & library MS/MS match	[M-H]-	HILIC-	Food Cluster 2	Flavonoid glycosides	QUQPHWDTPGMPEX-QJBIFVCTSA-N	CC1C(C(C(C(O1)OCC2C(C(C(C(O2)OC3=CC(=C4C(=O)CC(OC4=C3)C5=CC(=C(C=C5)OC)O)O)O)O)O)O)O)O	609.1814:416065 610.18475:125175 611.18811:41085	54.44188:2635 125.02274:15347 148.53471:2910 151.00223:14773 164.00931:14468 174.02948:3639 196.69095:2719 199.03905:3484 201.01833:3764 201.57867:3587 215.03091:3057 241.04936:2872 242.05705:16847 257.08151:15965 270.47629:3091 283.0592:3862 286.04776:35810 301.07053:720461 310.04749:2959 325.07071:18512 343.08255:5290 404.50217:2950 609.17834:25881	0	0	0	48881	84644	137652	167215	85988	0	0	0	0	0	0	0	0	0	0	0	0	22025	18410	26819	28865
HexCer 34:1;4O|HexCer 18:1;3O/16:0;(2OH)	lvl 2A	4.352	732.565	MS & library MS/MS match	[M+H]+	CSH+	Food Cluster 2	Glycosphingolipids	AYBHLNMQTQBJBX-XUTLUUPINA-N	CCCCCCCCCCCCCCC(O)C(=O)NC(COC1OC(CO)C(O)C(O)C1O)C(O)C(O)CCC\C=C\CCCCCCCCC	732.5647:798718 733.56805:482163 734.57141:119290	79.05428:3532 81.07001:12826 97.07665:2891 98.73219:3078 103.05672:3620 105.28297:3089 122.21883:3416 133.1017:3555 147.11644:2904 149.55222:3717 202.52896:3091 211.00717:3343 224.08803:2762 262.25439:42113 263.23822:4390 272.2594:5483 280.26486:40483 298.27496:21913 407.5914:3091 463.93826:3268 516.47949:3841 534.4939:27677 552.5:124255 570.51093:42128	0	0	0	126591	270221	211141	798718	201718	0	5674	0	35675	76604	0	0	0	0	0	0	0	53211	70377	116593	124407
HexCer 40:1;4O|HexCer 18:1;3O/22:0;(2OH)	lvl 2A	6.259	816.66	MS & library MS/MS match	[M+H]+	CSH+	Food Cluster 2	Glycosphingolipids	UPNWIBPHYOJXOA-IMVLJIQENA-N	CCCCCCCCCCCCCCCCCCCCC(O)C(=O)NC(COC1OC(CO)C(O)C(O)C1O)C(O)C(O)CCC\C=C\CCCCCCCCC	816.65942:567515 817.66277:238788 818.66613:47101	81.07011:5769 95.08536:4883 119.08563:3904 202.56587:5173 228.71509:3645 262.25366:38490 280.26346:29429 298.2753:14328 356.34998:4245 366.07233:3591 618.57941:18670 636.59485:109299 654.60406:46107 762.46692:3511	0	0	0	88077	153508	122100	506783	75985	0	0	0	59186	108235	8513	6039	0	0	0	0	0	122432	151228	179748	198718
HexCer 42:1;4O|HexCer 18:1;3O/24:0;(2OH)	lvl 2A	6.934	844.691	MS & library MS/MS match	[M+H]+	CSH+	Food Cluster 2	Glycosphingolipids	QZNIVVAKPLIDJX-ORIPQNMZNA-N	CCCCCCCCCCCCCCCCCCCCCCC(O)C(=O)NC(COC1OC(CO)C(O)C(O)C1O)C(O)C(O)CCC\C=C\CCCCCCCCC	844.69122:657483 845.69457:323131 846.69793:100253	74.25546:3025 77.30759:3297 81.07053:3399 83.23447:3272 95.08592:4088 99.37732:3453 103.13093:3254 107.08721:4239 191.19652:3478 192.66005:3479 245.22659:3892 257.92416:3476 262.25443:39700 263.23874:7242 280.26422:42197 298.27597:14621 356.38873:3277 384.38248:5292 397.24637:3913 646.61194:23083 664.62646:118800 682.63788:52474	0	0	0	204547	271004	279640	657483	204041	7477	0	8313	174682	249939	71063	21936	12095	0	0	0	0	211299	241543	331118	373473
His-Trp	lvl 2A	8.219	342.157	MS & library MS/MS match	[M+H]+	HILIC+	Food Cluster 2	Amino acids, peptides, and analogues	FBTYOQIYBULKEH-ZFWWWQNUSA-N	C1=CC=C2C(=C1)C(=CN2)C[C@@H](C(=O)O)NC(=O)[C@H](CC3=CN=CN3)N	342.1568:820183 343.16015:208538 344.16351:0	70.06538:4962 83.06027:17475 93.04507:8895 110.07157:640867 130.06578:3074 138.06645:48111 142.04735:2449 145.0497:3025 156.0269:4035 156.07712:52871 159.09271:22182 165.07782:9599 169.07651:4699 188.07147:27944 195.08894:14305 205.09767:19110 224.11896:3213 251.13141:3555 279.12296:5593 296.12317:2274 296.15213:40227 324.146:74199 342.1076:17416 342.15652:177385	0	0	13237	251098	152340	192955	820183	429068	163409	291608	367427	242195	249119	356196	397040	451804	47061	358708	0	182855	343384	362997	394064	406326
Homovanillic acid sulfate	lvl 2A	1.159	261.006	MS & library MS/MS match	[M-H]-	HILIC-	Food Cluster 2	Arylsulfates	IACOAKYXFIWAQN-UHFFFAOYSA-N	COC1=C(C=CC(=C1)CC(=O)O)OS(=O)(=O)O	261.00629:392276 262.00964:41136 263.013:34667	58.17867:1923 78.10075:2158 80.9638:2067 113.71592:2396 122.03519:4176 123.04355:3920 128.16838:2016 137.0589:14330 143.64449:2390 163.03877:4505 181.049:312339 199.73288:3276 220.49237:1839 261.0062:88084 261.07285:2653	0	6426	3920	161346	164321	242167	334109	227415	137344	136050	392276	416456	628696	419688	372025	325116	9440	7206	0	5839	169836	200192	205462	215284
Ile-Arg	lvl 2A	9.081	288.204	MS & library MS/MS match	[M+H]+	HILIC+	Food Cluster 2	Amino acids, peptides, and analogues	HYXQKVOADYPQEA-CIUDSAMLSA-N	CC[C@H](C)[C@@H](C(=O)N[C@@H](CCCN=C(N)N)C(=O)O)N	288.2037:3212992 289.20705:591407 290.21041:0	52.17181:2022 56.87806:2264 57.60991:1995 60.05596:42051 67.39639:1968 70.06528:56011 71.57738:2108 72.08105:3968 86.09659:176018 104.107:3478 108.05534:2559 112.08695:14686 115.08698:17230 116.07082:32628 130.09792:11274 133.00163:2394 133.09666:2839 140.57509:2299 156.11357:61731 157.10857:10241 158.09261:52075 175.11932:342027 177.04053:2558 185.10342:4955 225.17041:3622 226.15594:4128 228.171…	0	483350	617827	3042751	6084240	2727143	6363112	3435529	484610	1116306	1598947	6167878	2903262	3254098	1800914	3335931	753612	691964	1337466	1608236	3807880	3969996	4280651	4357910
Ile-Asn-Lys	lvl 2A	9.652	374.241	MS & library MS/MS match	[M+H]+	HILIC+	Food Cluster 2	Amino acids, peptides, and analogues	FJWYJQRCVNGEAQ-UHFFFAOYSA-N	CCC(C)C(C(=O)NC(CC(=O)N)C(=O)NC(CCCCN)C(=O)O)N	374.24078:2146330 375.24413:453831 376.24749:0	63.08599:2792 67.93491:2621 69.0702:14909 84.08105:119263 86.09663:376364 87.05553:12872 101.10786:12929 124.07704:4513 129.10262:346943 130.08675:114516 139.20029:2565 141.103:12673 147.11324:260336 155.11813:3926 157.09761:14181 182.12881:3575 183.11337:52586 184.10933:18829 190.19214:2316 198.12439:11234 200.14027:28974 201.13545:3760 208.10794:14200 209.09268:82996 211.10812:39106 219.08348:3…	0	0	0	0	147377	7882	14416	20729	0	8942	9801	187006	214465	52397	109730	82220	8760	7512	0	0	31801	63244	53064	69622
Maltotetraose	lvl 2A	10.111	665.214	MS & library MS/MS match	[M-H]-	HILIC-	Food Cluster 2	Carbohydrates and carbohydrate conjugates	LUEWUZLMQUOBSB-CHYJJPLWSA-N	C([C@@H]1[C@H]([C@@H]([C@H]([C@H](O1)O[C@@H]2[C@H](O[C@@H]([C@@H]([C@H]2O)O)O[C@@H]3[C@H](O[C@@H]([C@@H]([C@H]3O)O)O[C@@H]4[C@H](O[C@H]([C@@H]([C@H]4O)O)O)CO)CO)CO)O)O)O)O	665.2135:294570 666.21685:89754 667.22021:17903	59.01237:48423 62.96598:2603 70.77616:2654 71.0123:48709 73.02786:47512 81.03256:3311 83.01208:6350 85.028:3118 87.00719:4817 89.02288:60538 97.02768:24784 99.04422:2987 101.02285:93819 113.02277:21167 115.03889:4084 119.03318:25521 143.03362:16645 161.04416:70132 179.05457:106805 221.06544:43721 246.51405:3388 260.75311:2699 269.47903:2501 323.10095:3911 341.10834:31473 383.11868:55076 545.17096…	2383	855	973	67048	191206	105925	114206	192412	12922	3811	95764	2218356	1653912	325104	23796	24701	806	0	0	3601	200309	294570	336722	408785
Monoelaidin	lvl 2A	5.987	357.301	MS & library MS/MS match	[M+H]+	HILIC+	Food Cluster 2	Monoradylglycerols	RZRNAYUHWVFMIP-MDZDMXLPSA-N	CCCCCCCC/C=C/CCCCCCCC(=O)OCC(CO)O	357.30093:1144800 358.30428:445767 359.30764:69707	54.03602:2175 55.0546:25127 57.03394:15603 57.07029:41476 67.05451:43297 69.07014:76950 71.08578:38130 75.04437:4380 76.14113:2310 79.05436:16603 81.03378:2792 81.07008:74062 83.0857:77535 85.06509:4330 85.10136:21794 93.07003:30791 95.08577:93995 97.06522:28860 97.10155:61925 99.08064:4367 105.07032:3191 107.08585:35877 109.10146:60003 109.10921:4573 110.76275:2241 111.08078:17346 111.11712:2570…	0	0	0	0	29140	11487	98027	70626	14145	31985	409220	1038317	1144800	563210	538687	705445	15673	0	0	0	199342	178919	207715	203698
Phe-Lys	lvl 2A	9.002	294.182	MS & library MS/MS match	[M+H]+	HILIC+	Food Cluster 2	Amino acids, peptides, and analogues	FADYJNXDPBKVCA-STQMWFEESA-N	C1=CC=C(C=C1)C[C@@H](C(=O)N[C@@H](CCCCN)C(=O)O)N	294.18216:1145680 295.18551:202601 296.18887:0	58.2435:2459 69.85503:2326 76.59324:2307 84.081:216060 99.16034:2320 101.10757:31780 120.08112:264562 123.90736:2636 129.10258:256148 129.1873:2228 130.08662:175923 136.99625:2201 147.1132:282828 231.14908:13520 259.14459:16903 276.1712:31825 277.15439:15966 277.33359:2258 294.18207:304359	5754	92535	135271	259520	1145680	214632	364971	378149	32728	92278	139420	413739	322708	190662	288792	230370	108245	33392	199241	194714	460739	452761	450261	499241
Pro-Arg	lvl 2A	9.51	272.172	MS & library MS/MS match	[M+H]+	HILIC+	Food Cluster 2	Amino acids, peptides, and analogues	HMNSRTLZAJHSIK-YUMQZZPRSA-N	C1C[C@H](NC1)C(=O)N[C@@H](CCCN=C(N)N)C(=O)O	272.1723:2553832 273.17565:322276 274.17901:53773	56.00681:2295 60.05596:50527 64.27647:2138 67.25391:2358 70.0653:272419 72.08115:3115 84.74867:2524 110.07151:3949 112.08707:43876 113.07053:5795 114.10252:4182 115.08669:33966 116.07083:49599 118.89828:2378 130.09789:15094 133.09703:2487 140.08205:55875 143.22581:2243 157.10869:16283 158.07925:3828 158.09282:59867 175.11934:542839 185.10362:19865 194.12941:5742 195.11334:16092 212.13972:12872 21…	0	412235	350884	279758	2334870	3590786	5392213	462831	136683	223859	674585	2668825	1607008	3026038	1103756	2201947	397776	661729	79873	322121	2867122	3053936	3045988	3514832
Quercetin	lvl 2A	1.303	303.051	MS & library MS/MS match	[M+H]+	HILIC+	Food Cluster 2	Flavones	REFJWTPEDVJJIY-UHFFFAOYSA-N	C1=CC(=C(C=C1C2=C(C(=O)C3=C(C=C(C=C3O2)O)O)O)O)O	303.05066:307808 304.05401:20148 305.05737:0	50.76361:2659 63.33963:1866 78.95313:2208 79.10875:1862 80.29623:1853 82.37778:2091 111.00782:2368 111.16287:2187 118.29935:2056 137.02383:4203 153.01883:4931 163.40508:2156 165.01857:3337 169.43668:2163 200.37074:2178 229.04926:4192 247.06064:4527 257.04388:3655 285.04044:8905 303.05054:819351 303.30771:3752	0	0	0	11380	6686	43891	103054	187517	9758	6469	0	0	0	0	0	0	0	0	0	0	16713	15623	36295	32817
Ser-Leu-Arg	lvl 2A	9.135	375.236	MS & library MS/MS match	[M+H]+	HILIC+	Food Cluster 2	Amino acids, peptides, and analogues	QYSFWUIXDFJUDW-UHFFFAOYSA-N	CC(C)CC(C(=O)NC(CCCN=C(N)N)C(=O)O)NC(=O)C(CO)N	375.23587:419322 376.23922:67863 377.24258:0	50.81551:2475 60.05582:10298 70.06525:19218 84.08079:2290 86.09676:19697 102.67283:2711 112.08727:5373 115.08688:4813 116.07071:11666 126.84655:2165 127.41294:2582 129.10255:4345 130.0507:2505 130.09708:2247 157.10855:4263 158.09341:22694 173.12906:65473 175.11945:95661 175.61002:2619 198.05936:9788 201.12389:17824 225.17232:2414 239.42047:2314 247.06952:2064 271.17642:5428 340.19894:3135 345.226…	0	39309	5531	66956	419322	55325	181920	131624	14269	5958	15328	93921	84572	55584	143870	98820	17888	0	0	0	176081	166979	174269	176559
Syringaldehyde	lvl 2A	2.402	183.066	MS & library MS/MS match	[M+H]+	HILIC+	Food Cluster 2	Methoxyphenols	KCDXJAYRVLXPFO-UHFFFAOYSA-N	COC1=CC(=CC(=C1O)OC)C=O	183.06564:321535 184.06899:23947 185.07235:0	68.93576:2358 73.69647:1890 85.84677:1842 89.77323:2206 95.04924:58073 95.08612:2727 110.75394:2061 123.04428:114896 132.95905:3309 140.04713:27825 155.07056:53161 155.97554:14758 177.95676:11874 183.0663:17301	0	0	0	86550	258115	251153	321535	161335	4457	0	6631	9273	12060	0	8915	0	0	0	0	0	25497	25899	24332	28012
Tyr-Arg	lvl 2A	9.375	338.183	MS & library MS/MS match	[M+H]+	HILIC+	Food Cluster 2	Amino acids, peptides, and analogues	JXNRXNCCROJZFB-RYUDHWBXSA-N	C1=CC(=CC=C1C[C@@H](C(=O)N[C@@H](CCCN=C(N)N)C(=O)O)N)O	338.18317:3764677 339.18652:625052 340.18988:127474	60.05596:77906 70.06535:148738 71.04922:2230 72.0809:4836 98.06011:3273 100.05099:5608 107.04903:3104 112.08712:44431 113.07108:3887 114.10268:3384 115.0789:3033 115.08689:30390 116.07121:39837 119.04943:3795 130.09792:16025 133.09784:3136 136.0761:312395 138.06671:2527 140.08191:15324 157.10924:20659 158.07948:4559 158.093:85961 170.09291:3721 175.11943:359287 178.09731:4264 183.28009:2754 185.1…	42894	229992	914097	994432	3764677	1146021	1020394	1464486	605247	1078981	514146	1763904	1840841	1040699	1844363	1944842	622782	306625	1477696	550857	1024026	973502	1018659	974093
Val-Arg	lvl 2A	9.381	274.188	MS & library MS/MS match	[M+H]+	HILIC+	Food Cluster 2	Amino acids, peptides, and analogues	IBIDRSSEHFLGSD-YUMQZZPRSA-N	CC(C)[C@@H](C(=O)N[C@@H](CCCN=C(N)N)C(=O)O)N	274.18805:4433322 275.1914:572285 276.19476:0	55.05471:10423 57.05738:2925 60.05598:112776 66.74237:2468 70.06536:150948 72.08099:374618 91.14561:2551 92.27074:2322 96.42923:2381 99.3174:2598 112.08713:39949 113.07104:4933 114.10315:20385 115.08704:52666 116.07092:85119 117.10259:4334 123.13567:2935 128.03212:11408 130.09816:24311 133.09744:15842 140.08244:4887 142.09785:173381 157.10902:27273 158.09277:153360 169.13416:10269 175.11945:88435…	0	331477	367596	623129	2093332	1219158	2230684	1090289	312410	359366	436521	2912527	1797398	1002698	995247	889969	904461	527907	375126	436127	1325992	1353166	1351908	1298922
9-Oxo-10E,12Z-octadecadienoic acid	lvl 2A	1.083	295.228	MS & library MS/MS match	[M+H]+	HILIC+	Food Cluster 3	Lineolic acids and derivatives	LUZSWWYKKLTDHU-ZJHFMPGASA-N	CCCCC/C=C\C=C\C(=O)CCCCCCCC(=O)O	295.22745:1263898 296.2308:378175 297.23416:1750770	53.03923:2527 55.01835:8268 55.05458:17694 57.034:2446 57.07022:9455 59.0491:2447 67.0544:42140 69.07003:40112 71.04929:2638 71.08563:43189 71.61274:2475 73.52921:2267 79.05444:34774 81.03367:24705 81.07001:58002 83.04942:16290 83.08572:20173 85.10091:2494 91.05441:19065 93.06998:53418 95.04925:26531 95.08561:35112 97.06516:11835 97.10146:14093 99.08069:35482 105.07022:22040 107.04913:2707 107.08…	8164	19180	1032235	541145	56031	77627	159420	1209278	553181	254498	1116867	332806	537095	448964	376187	121273	13684	15928	21592	34095	468964	510528	538619	499972
DG 30:1	lvl 2A	5.668	561.451	MS & library MS/MS match	[M+Na]+	CSH+	Food Cluster 3		JTRCZCRPVKKEJS-YPKPFQOONA-N	CCCCCCCC\C=C/CCCCCCCCCCCC(=O)OC(CO)COC(=O)CCCCCCC	561.45135:7961459 562.4547:3407844 563.45806:683564	71.08577:6273 107.45255:6263 257.21289:12112 561.45044:1910123	0	0	0	7663	0	5448	0	427768	187661	39573	68852	7719	0	193054	137246	14486	0	0	51988	138547	355164	437077	550677	586372
DG 33:0	lvl 2A	7.301	605.514	MS & library MS/MS match	[M+Na]+	CSH+	Food Cluster 3		YRNHPLWOCNSXMF-UHFFFAOYNA-N	CCCCCCCCCCCCCCCCCCCCCCCCC(=O)OC(CO)COC(=O)CCCCCCC	605.5141:4090664 606.51745:1641081 607.52081:359760	76.93056:2891 91.90411:3119 201.10814:3944 201.17445:2905 317.30057:3207 325.36743:3115 526.16827:3325 540.12:2755 605.51398:1209192	0	16774	29183	23295	5871	5184	0	168075	26692	6789	45576	5690	0	113586	28291	11183	33725	0	8162	75878	247521	314521	359758	368705
DG 33:1	lvl 2A	6.687	603.499	MS & library MS/MS match	[M+Na]+	CSH+	Food Cluster 3		DJKDYVZXWQKRJI-MSUUIHNZNA-N	CCCCCCCCCC\C=C/CCCCCCCCCCCC(=O)OC(CO)COC(=O)CCCCCCCC	603.49854:2853050 604.50189:1267467 605.50525:284728	78.77134:2969 101.7309:2695 201.10356:4056 210.84456:3036 299.25995:3118 328.82928:2819 405.42529:2922 579.26471:2990 603.49811:803716	0	0	0	0	5025	0	0	1575986	59203	31929	105518	0	0	340604	25546	0	6445	8127	18711	60626	266505	330974	413308	448839
DG 34:4|DG 16:1_18:3	lvl 2A	5.436	606.512	MS & library MS/MS match	[M+NH4]+	CSH+	Food Cluster 3	Lineolic acids and derivatives	UUPFPLJLQPYEKS-MVXJGUQMNA-N	CCCCCC\C=C/CCCCCCCC(=O)OCC(CO)OC(=O)CCCCCCC\C=C/C\C=C/C\C=C/CC	606.51202:4239080 607.51537:1892925 608.51873:433157	71.0857:17762 79.05447:38566 81.06505:5800 81.07018:124438 83.08579:52846 85.06489:3942 85.10133:8060 91.05431:14357 93.0703:61503 95.04852:3274 95.08582:110947 97.06508:16432 97.10156:45469 99.08079:4088 102.8131:3617 105.07019:15687 107.08593:46805 109.10166:65905 111.08033:5163 111.11693:13698 117.06988:3522 119.08577:18768 121.1017:76453 123.11742:31772 125.09634:4385 131.08578:14883 133.1013…	0	0	0	0	20612	0	0	4239080	56988	7922	109097	0	0	495834	37498	0	0	0	0	0	179144	197336	211591	206541
DG 35:1|DG 17:0_18:1	lvl 2A	7.36	626.575	MS & library MS/MS match	[M+NH4]+	CSH+	Food Cluster 3	Diacylglycerols	CPYYIMXJKFANHS-ZPHPHTNENA-N	CCCCCCCCCCCCCCCCC(=O)OCC(CO)OC(=O)CCCCCCC\C=C/CCCCCCCC	626.57446:2530490 627.57781:1556738 628.58117:345762	71.08571:31671 81.07024:40194 83.08588:37477 85.10136:30464 93.0705:4610 95.08583:51689 97.06539:3003 97.10158:30411 107.08658:3449 109.10161:29511 111.1175:11309 121.10176:16249 123.1171:16771 135.11758:12881 137.13293:3585 139.11266:3235 149.13326:11761 151.14871:3130 247.24258:5405 253.25374:6937 265.25458:13022 271.2659:3220 313.27597:10838 325.27505:15454 327.29047:252318 339.29059:264487 34…	0	0	0	0	0	0	0	2530490	125121	0	116313	0	0	388536	50328	0	0	0	0	0	306431	463107	423333	443482
DG 35:2|DG 17:1_18:1	lvl 2A	6.753	624.559	MS & library MS/MS match	[M+NH4]+	CSH+	Food Cluster 3		VZRUYZOUKQDWIP-YGGBKCGDNA-N	CCCCCCCC\C=C/CCCCCCCC(=O)OC(CO)COC(=O)CCCCCCC\C=C/CCCCCCC	624.5589:1359442 625.56225:555036 626.56561:120844	71.08575:5124 81.07021:25423 83.08601:14316 93.07051:3617 95.08583:21498 97.06538:2698 97.1017:15634 109.10198:15069 111.11764:3731 121.10166:17635 123.11736:4316 135.11716:14371 149.13272:5422 165.16617:3024 202.53586:3374 226.95308:3975 251.23854:3639 265.25348:6588 325.27493:149368 339.29056:136734 589.52087:134999	0	0	0	0	0	0	0	12624638	208011	11766	137784	0	0	1359442	48220	0	0	0	0	0	311361	387973	461145	543505
DG 36:1|DG 18:0_18:1	lvl 2A	7.027	640.59	MS & library MS/MS match	[M+NH4]+	CSH+	Food Cluster 3	Diacylglycerols	SAEPUUXWQQNLGN-ZZEZOPTANA-N	CCCCCCCCCCCCCCCCCC(=O)OCC(CO)OC(=O)CCCCCCC\C=C/CCCCCCCC	640.59015:21886320 641.5935:12097886 642.59686:2632437	70.07351:26592 78.72751:20463 79.05462:19791 81.07002:106691 82.07347:19655 83.08595:135174 84.08887:20253 95.08577:114457 97.10153:77303 98.10475:37282 109.10148:36909 121.10184:32229 122.10555:24685 135.11711:72786 150.13777:20271 201.96791:24458 222.00273:18211 265.25302:26008 266.2572:24113 339.29047:459539 340.29428:866730 341.29681:621006 342.9697:20051 353.23032:22213 547.32343:18432 605.5…	0	0	0	0	7479	0	0	21886320	946867	255566	799066	0	0	8390321	291581	0	15733	0	28415	43034	2907649	3444102	4885638	4737934
DG 38:1	lvl 2A	8.327	673.577	MS & library MS/MS match	[M+Na]+	CSH+	Food Cluster 3		YUHZZKCTAUABMN-NXVVXOECNA-N	CCCCCCCCCC\C=C/CCCCCCCCCCCCCCCCCC(=O)OC(CO)COC(=O)CCCCCCC	673.57672:670367 674.58007:280816 675.58343:50639	72.83511:2706 86.74527:2937 88.38261:3087 92.20877:3133 198.061:13482 198.07974:3317 260.89395:2716 311.11774:3019 320.6185:3156 331.63818:2885 450.33002:2970 673.57507:360894	0	0	0	0	0	0	0	8903548	317427	54921	175241	0	0	1672828	77508	0	0	0	7166	0	562445	861104	1013715	1062132
DG 38:4|DG 18:1_20:3	lvl 2A	6.718	662.575	MS & library MS/MS match	[M+NH4]+	CSH+	Food Cluster 3		ZXWSLQAQQZOXNU-ZYKQNZMBNA-N	CCCCCCCC\C=C/CCCCCCCC(=O)OCC(CO)OC(=O)CCCCCCCCC\C=C/C\C=C/C\C=C/CC	662.57434:712352 663.57769:339848 664.58105:260228	79.05481:3954 81.07038:16547 83.08595:5453 88.11233:72473 89.08314:2885 93.07043:11782 95.08578:21023 97.10226:4725 107.08624:10571 108.4582:2824 109.10195:6264 121.10119:5048 131.48128:2617 135.11719:5009 149.13419:2705 150.45876:3517 163.14764:3140 202.54318:3960 271.24448:4240 289.25412:14639 309.2789:28628 311.64056:3509 339.29028:66942 363.29285:39062 594.48102:2662 627.53217:26010	0	0	0	0	5458	0	0	996558	132128	89881	223278	0	0	190833	25333	0	0	0	0	0	73462	136605	129684	134951
FAHFA 18:1/20:0	lvl 2A	6.76	591.535	MS & library MS/MS match	[M-H]-	CSH-	Food Cluster 3	Fatty acids and conjugates	RGWPMZZEBAEAQK-NXVVXOECNA-N	CCCCCCCCCCCC(CCCCCCCC(O)=O)OC(=O)CCCCCCC\C=C/CCCCCCCC	591.53461:326711 592.53796:131067 593.54132:0	72.94469:3518 83.91209:2794 141.58066:2579 201.37527:2795 281.2478:171979 309.27997:20424 310.9545:3401 327.28909:51639 591.5318:32252	0	0	0	0	0	0	0	326711	17535	0	37808	0	0	191877	28338	0	0	0	0	0	17215	44733	35859	36017
FAHFA 36:2|FAHFA 18:1/18:1	lvl 2A	5.862	561.487	MS & library MS/MS match	[M-H]-	CSH-	Food Cluster 3	Fatty acids and conjugates	DHOLNZBDURYVOE-SVADLMEDNA-N	CCCCCCCCC=CCCCCCCCC(=O)OC(CCCCC)CCCCCCCCCCCC(=O)O	561.48724:348242 562.49059:220834 563.49395:54013	70.08228:2360 103.69022:2822 111.79485:2611 112.40781:2431 201.13611:6415 279.23169:35945 281.24762:155320 297.24332:15726 561.49152:24856	0	0	0	0	0	0	0	1902909	204619	21418	326790	0	0	712361	153301	0	0	0	0	0	283681	313887	360988	436477
TG 50:1|TG 16:0_16:0_18:1	lvl 2A	10.97	850.79	MS & library MS/MS match	[M+NH4]+	CSH+	Food Cluster 3	Triacylglycerols	YHMDGPZOSGBQRH-QPLCGJKRNA-N	CCCCCCCCCCCCCCCC(=O)OCC(COC(=O)CCCCCCC\C=C/CCCCCCCC)OC(=O)CCCCCCCCCCCCCCC	850.79022:1996035 851.79357:863415 852.79693:324408	71.08578:59609 79.0546:8003 81.07021:77549 83.08582:58337 85.10146:43619 90.84679:3919 93.07011:5748 95.08587:97262 95.09206:5579 97.10142:45065 106.93829:3758 107.08581:6583 109.10155:55159 111.11747:21218 121.10174:21651 123.11746:23395 135.11754:18626 137.13367:13341 151.14784:4890 152.78197:3710 163.14951:3398 177.16339:3824 212.28516:3265 235.87053:4169 239.23863:42975 265.25366:30293 292.32…	53294	19295	42466	15808	8165	15757	11076	35983076	51695	24831	53312	38229	20707	654416	69556	58978	19184	9087	40032	128843	1240570	1647541	2025863	2470988
TG 56:3|TG 20:0_18:1_18:2	lvl 2A	10.997	930.852	MS & library MS/MS match	[M+NH4]+	CSH+	Food Cluster 3	Triacylglycerols	ODTSMODPVGNVHB-TZCGOUFENA-N	CCCCCCCCCCCCCCCCCCCC(=O)OCC(COC(=O)CCCCCCC\C=C/CCCCCCCC)OC(=O)CCCCCCC\C=C/C\C=C/CCCCC	930.85187:35192964 931.85522:26334044 932.85858:12225750	81.07025:209512 82.07356:22141 83.08553:120110 93.06993:25890 95.08577:265307 96.08905:36334 97.1015:47413 109.10146:119997 121.1016:41844 122.10542:27971 149.13382:25504 166.33029:23738 228.68619:21837 601.5202:83546 602.52435:287146 603.53052:309331 629.54675:43616 630.55707:257399 631.56268:362552 632.57495:305613 633.57367:303975	0	0	0	0	0	0	0	16880808	284624	10751	55238	0	0	3991539	22563	0	0	0	13323	0	2698570	4579900	6665902	7265118
TG 56:6|TG 18:1_18:1_20:4	lvl 2A	10.494	929.761	MS & library MS/MS match	[M+Na]+	CSH+	Food Cluster 3	Triacylglycerols	LWFHQFIZUUUVSB-BMRXIDLQNA-N	CCCCCCCC\C=C/CCCCCCCC(=O)OCC(COC(=O)CCCCCC\C=C/C\C=C/C\C=C/C\C=C/CC)OC(=O)CCCCCCC\C=C/CCCCCCCC	929.76123:956271 930.76458:631097 931.76794:205234	79.05457:5030 81.0702:19822 83.08586:14771 90.22051:3362 91.05445:8533 93.0702:7961 94.04932:3780 95.08591:17175 97.10187:3953 109.10153:7192 111.68967:3825 121.10217:7216 122.9266:3572 135.11757:6683 135.21106:3833 339.29269:15873 458.3924:4931 603.53705:15934 625.51917:47161 647.50238:49878 929.76105:609399	0	0	0	0	12517	0	0	958834	57537	0	14842	0	0	105860	8288	0	0	0	0	0	141983	148373	174948	186946
trans-Traumatic acid	lvl 2A	1.431	227.127	MS & library MS/MS match	[M-H]-	HILIC-	Food Cluster 3	Fatty acids and conjugates	MAZWDMBCPDUFDJ-VQHVLOKHSA-N	C(CCCCC(=O)O)CCC/C=C/C(=O)O	227.12749:1870804 228.13084:455009 229.1342:47319	58.20654:1988 58.27889:2103 58.82982:1974 70.54496:1915 84.51678:2173 96.70662:2210 126.90251:3066 133.85292:2532 165.12677:68531 183.13742:406110 202.68562:2720 202.70509:2136 226.80019:19520 227.12743:64464	9730	5059	96174	23398	9125	7780	11982	62415	86523	11358	27842	21474	28918	20633	26457	4604	10603	11068	11244	23622	27349	31790	32770	33578
3-Hydroxybutyrylcarnitine	lvl 2A	7.675	248.15	MS & library MS/MS match	[M+H]+	HILIC+	Food Cluster 4	Fatty acid esters	UEFRDQSMQXDWTO-YGPZHTELSA-N	CC(CC(=O)O[C@H](CC(=O)[O-])C[N+](C)(C)C)O	248.14989:847018 249.15324:141228 250.1566:0	51.80417:1953 60.08103:25759 60.47478:2143 70.54957:2070 73.21569:2219 85.02861:196546 87.04414:8480 89.45835:2691 97.27123:2237 103.03921:37704 118.79019:1976 119.20945:2043 144.10196:3728 145.04979:14895 179.68076:2170 181.67493:2160 189.07608:38259 193.10475:2266 248.14992:241538	61934	80156	54826	46292	0	8225	7649	103376	4028	22141	78780	202140	141538	69702	17242	49650	847018	494355	17354	49408	136123	138199	152804	143308
Galactinol	lvl 2A	9.821	343.124	MS & library MS/MS match	[M+H]+	HILIC+	Food Cluster 4	Carbohydrates and carbohydrate conjugates	VCWMRQDBPZKXKG-DXNLKLAMSA-N	C([C@@H]1[C@@H]([C@@H]([C@H]([C@H](O1)O[C@@H]2[C@H]([C@@H]([C@H]([C@@H]([C@@H]2O)O)O)O)O)O)O)O)O	343.12442:287501 344.12777:37102 345.13113:0	52.5073:2032 54.69506:2024 60.90825:2129 61.02872:28854 69.03364:3065 73.02863:9349 81.03371:21692 85.02859:52507 91.03925:63593 92.21806:2187 96.06801:2329 97.02879:15559 99.0693:2343 109.02869:48054 120.53391:2121 127.03944:27246 145.04997:26536 163.06076:31783 181.07086:18385 201.41789:3224 205.95799:2323	0	0	0	74593	165152	158778	199850	182800	38042	67912	186998	658585	769185	335225	184415	135506	289982	295092	37342	7199	121273	121573	107149	136601
Glu-Pro	lvl 2A	8.788	245.114	MS & library MS/MS match	[M+H]+	HILIC+	Food Cluster 4	Amino acids, peptides, and analogues	YBTCBQBIJKGSJP-BQBZGAKWSA-N	C1C[C@H](N(C1)C(=O)[C@H](CCC(=O)O)N)C(=O)O	245.11397:1596228 246.11732:210668 247.12068:0	58.00546:1979 70.06534:66098 71.06895:3570 84.04463:73684 89.84904:2038 99.07012:2297 102.05515:9062 116.07092:197100 117.07444:4269 130.35794:2418 140.08685:1966 174.46709:2661 181.09772:39891 200.18483:1962 209.09303:31086 226.1483:2211 227.10269:229309 227.12192:22378 228.10719:28806 245.11404:10534	0	0	25121	201189	86030	75514	359780	183155	46371	112607	244871	1576100	1188484	226660	493069	440132	1589785	354804	47088	306117	412935	478263	485621	478667
Glutamic acid	lvl 2A	8.891	148.061	MS & library MS/MS match	[M+H]+	HILIC+	Food Cluster 4	Amino acids, peptides, and analogues	WHUUTDBJXJRKMK-VKHMYHEASA-N	C(CC(=O)O)[C@@H](C(=O)[O-])[NH3+]	148.06081:14975663 149.06416:1026603 150.06752:859546	50.2346:3749 51.15204:3421 56.04969:6698 84.04458:716260 85.02839:14271 85.04807:4528 85.18127:3863 102.05521:231620 102.06291:7633 130.05025:188056 131.05414:6232 148.06071:59946	997028	969200	2149595	4424476	4877658	2187062	5868494	5645070	2313400	3404197	3175272	27473272	14975663	2756363	3741131	3964666	62541068	5203290	1659459	5521102	8231908	8787593	8374112	8812339
His-Pro	lvl 2A	9.374	251.114	MS & library MS/MS match	[M-H]-	HILIC-	Food Cluster 4	Amino acids, peptides, and analogues	LNCFUHAPNTYMJB-IUCAKERBSA-N	C1C[C@H](N(C1)C(=O)[C@H](CC2=CN=CN2)N)C(=O)O	251.11394:197713 252.11729:23011 253.12065:4197	65.20078:1938 80.03645:7618 81.04417:3549 108.0552:3143 114.05436:64369 136.05069:3901 177.94754:2537 186.94821:2122 201.87474:2469 207.12421:18909 225.97897:2073 233.10236:8578 251.11421:24305	516	1694	46361	33318	0	8454	39063	35152	14755	15640	21080	125549	94937	35417	48919	55481	61275	54808	11586	44252	60959	65823	73780	87813
Ile-Pro-Ile	lvl 2A	6.224	342.24	MS & library MS/MS match	[M+H]+	HILIC+	Food Cluster 4	Amino acids, peptides, and analogues	JNTMAZFVYNDPLB-UHFFFAOYSA-N	CCC(C)C(C(=O)N1CCCC1C(=O)NC(C(C)CC)C(=O)O)N	342.23975:1748952 343.2431:391490 344.24646:0	60.03788:2409 60.26073:2255 70.06535:646084 75.84248:2592 86.09663:160684 98.05988:20347 112.66262:2686 126.05542:17082 132.10181:17217 183.14973:161969 183.16808:5468 196.81612:9136 211.14471:170121 229.15541:1093178 324.22687:3028 342.16968:8823 342.23978:250687	11403	27429	93662	223810	125236	100651	489941	308824	81980	177891	368368	1748952	826508	213569	84407	62742	342258	2291552	9205	405396	806701	860706	803416	838675
Ile-Trp	lvl 2A	6.373	318.182	MS & library MS/MS match	[M+H]+	HILIC+	Food Cluster 4	Amino acids, peptides, and analogues	BVRPESWOSNFUCJ-NZVBXONLSA-N	CC[C@H](C)[C@H](C(=O)N[C@@H](CC1=CNC2=CC=CC=C21)C(=O)O)N	318.18207:647714 319.18542:198408 320.18878:0	51.82753:2992 67.03666:2695 69.07025:14297 71.04984:1977 72.68263:2725 75.38707:2340 76.03952:2030 82.67236:2011 86.09663:349150 88.90886:2173 102.06854:2252 139.32045:2185 141.10287:12758 144.082:3486 146.06065:12721 159.0923:4474 164.92462:2508 188.07112:192833 205.09789:200193 224.53467:2533 225.16393:3383 243.17714:3352 272.17697:3199 318.18033:67800	117581	344733	650868	659586	127455	126459	647714	1013335	583508	838038	620611	1525640	962662	802457	744291	1236704	1861117	701673	58395	364130	848567	788658	905278	915759
Isovaleryl-L-carnitine	lvl 2A	5.501	246.171	MS & library MS/MS match	[M+H]+	HILIC+	Food Cluster 4	Fatty acid esters	IGQBPDJNUXPEMT-SNVBAGLBSA-N	CC(C)CC(=O)O[C@H](CC(=O)[O-])C[N+](C)(C)C	246.17061:12833473 247.17396:1889586 248.17732:139401	57.03388:11554 57.07031:229300 60.08113:602961 85.02861:5992229 85.06503:144312 103.07544:20832 144.10228:139027 144.7489:10187 187.07736:24382 187.09703:1441476 246.1707:3908011	174374	169241	410676	166183	147022	47616	80491	334986	50443	47908	451249	536981	309231	156660	91938	64865	12833473	9805930	479742	304982	1015863	1105014	1089300	1102374
N-Acetyl-DL-valine	lvl 2A	2.602	158.081	MS & library MS/MS match	[M-H]-	HILIC-	Food Cluster 4	Amino acids, peptides, and analogues	IHYJTAOFMMMOPX-UHFFFAOYSA-N	CC(C)C(C(=O)O)NC(=O)C	158.08063:455674 159.08398:35564 160.08734:0	58.02833:2366 65.14512:1967 66.10653:2042 79.3269:2000 99.92368:2992 114.05467:4140 114.09104:12127 116.06995:144213 121.12132:2081 158.08055:44697	42948	36166	504917	148813	154434	130113	201778	387419	238287	174196	340309	456995	664543	370272	157305	155504	261428	201562	53792	98737	220252	253855	257112	277998
Phe-Pro	lvl 2A	6.993	263.14	MS & library MS/MS match	[M+H]+	HILIC+	Food Cluster 4	Amino acids, peptides, and analogues	WEQJQNWXCSUVMA-RYUDHWBXSA-N	C1C[C@H](N(C1)C(=O)[C@H](CC2=CC=CC=C2)N)C(=O)O	263.13977:39441936 264.14312:6919425 265.14648:419683	50.84568:28866 51.75981:28561 57.23418:23693 70.06532:2259946 72.08068:52030 86.09666:208512 91.59443:22844 103.05413:50479 114.05569:37474 116.07087:17715450 120.08108:14049153 131.04877:22759 136.07635:105373 156.10915:25366 192.6635:24120 194.42473:25989 199.21548:21753 201.72116:30296 246.11353:28471 263.13983:4819920	28103	49244	636460	728356	130658	206302	916627	1309119	195302	625118	3019911	39441936	17203296	2513058	1030815	1180373	4151087	2260124	129118	395381	3969090	3986889	3829646	4696365
Pro-Gln	lvl 2A	8.786	242.113	MS & library MS/MS match	[M-H]-	HILIC-	Food Cluster 4	Amino acids, peptides, and analogues	SHAQGFGGJSLLHE-BQBZGAKWSA-N	C1C[C@H](NC1)C(=O)N[C@@H](CCC(=O)N)C(=O)O	242.11356:2306410 243.11691:359938 244.12027:35947	58.02807:2445 66.28488:2280 67.90335:2112 78.95731:14444 82.02827:10248 83.05994:19679 97.04399:2322 101.07055:5212 107.34625:2135 110.43531:2003 113.07043:126247 114.05415:16045 125.39086:2370 127.04964:56436 128.03366:3058 137.03403:4206 139.08534:2797 145.06042:19196 152.99469:4072 153.10226:3827 163.08673:2721 168.04143:18213 171.07506:5095 171.60652:2107 179.12776:2479 180.11279:268355 181.0…	1426	10175	193825	69215	16984	39288	107717	211862	31942	111360	454208	1788196	1135878	284060	73067	60485	225997	101948	13764	104824	408687	536866	588021	629982
Pro-Glu	lvl 2A	8.598	243.097	MS & library MS/MS match	[M-H]-	HILIC-	Food Cluster 4	Amino acids, peptides, and analogues	QLROSWPKSBORFJ-BQBZGAKWSA-N	C1C[C@H](NC1)C(=O)N[C@@H](CCC(=O)O)C(=O)O	243.09747:2811812 244.10082:383924 245.10418:70810	51.23601:1992 55.33905:1873 59.85518:2229 60.64586:2115 62.56362:2069 77.31107:1975 78.46454:2213 82.02813:9615 84.0443:2666 94.99176:2097 100.03883:3416 102.05459:12802 113.07056:33791 114.05443:154492 116.89216:2345 127.08563:3158 128.03354:34001 146.04425:2721 153.10226:3402 155.11752:34371 181.09666:57354 187.4288:2127 199.1075:114333 215.26675:2307 225.08698:63522 243.09744:216206	0	11466	117754	116713	78351	121370	325225	179352	71341	84940	825443	707824	474385	317006	138388	148785	294070	1126480	35769	673531	375454	472758	493896	528389
Pro-Pro	lvl 2A	8.027	213.124	MS & library MS/MS match	[M+H]+	HILIC+	Food Cluster 4	Amino acids, peptides, and analogues	RWCOTTLHDJWHRS-YUMQZZPRSA-N	C1C[C@H](NC1)C(=O)N2CCC[C@H]2C(=O)O	213.12404:11820733 214.12739:1474356 215.13075:0	53.47143:8772 70.06529:7090240 71.94182:8265 75.52331:7475 98.06028:18570 105.04424:11811 110.51428:7977 116.07082:1917594 141.00073:42891 158.02708:31295 179.67261:8804 198.56429:12876 198.58159:14268 213.12383:3807449	275502	366332	421893	1406646	249739	290629	1191816	2461724	214501	1263144	7631294	90235880	47893312	4648969	2765176	7431504	8208286	3888628	281077	2702690	5516085	6416859	6656494	6311045
Pro-Pro-Lys	lvl 2A	9.453	341.219	MS & library MS/MS match	[M+H]+	HILIC+	Food Cluster 4	Amino acids, peptides, and analogues	PCWLNNZTBJTZRN-UHFFFAOYSA-N	C1CC(NC1)C(=O)N2CCCC2C(=O)NC(CCCCN)C(=O)O	341.2193:2919008 342.22265:496326 343.22601:43978	66.03231:2758 70.06534:486051 70.32127:2393 71.72426:2689 72.14948:2258 76.60461:2241 84.08096:91100 98.06037:56468 99.09172:4371 101.10758:38920 101.96774:2690 116.07082:12905 126.05526:85560 129.10254:119838 129.77724:2512 130.08667:58118 139.01622:2743 147.11322:187003 160.09801:2466 162.9297:2471 167.11842:19025 181.13394:3567 195.11349:46632 209.12936:13019 213.12379:36399 226.15564:116348 2…	0	4749	13998	31969	0	7319	78009	107180	0	6619	105107	744182	427169	87036	0	27692	2919008	661661	0	29013	203611	234804	260633	253453
Pro-Ser	lvl 2A	8.734	201.087	MS & library MS/MS match	[M-H]-	HILIC-	Food Cluster 4	Amino acids, peptides, and analogues	AFWBWPCXSWUCLB-WDSKDSINSA-N	C1C[C@H](NC1)C(=O)N[C@@H](CO)C(=O)O	201.08679:2670062 202.09014:305096 203.0935:15925	52.83897:2084 58.02833:2648 60.83741:1863 60.9915:2798 64.62634:2104 74.02304:13598 75.80437:2224 79.16555:2072 80.22697:2190 91.77128:2124 96.43311:1755 99.05516:2724 114.05429:23049 125.07047:8068 127.0862:36224 139.07487:3474 139.08618:61305 140.22655:2164 153.06538:11587 157.09776:2716 171.07603:299306 192.82607:2198 201.08684:140360	6396	139966	1254064	472727	117588	257947	554562	516075	178715	352895	1380431	2485838	1892058	557084	424580	445974	2670062	1720159	101060	929902	1213383	1518512	1663566	1881726
Thr-Arg	lvl 2A	9.8	276.167	MS & library MS/MS match	[M+H]+	HILIC+	Food Cluster 4	Amino acids, peptides, and analogues	HYLXOQURIOCKIH-VQVTYTSYSA-N	C[C@H]([C@@H](C(=O)N[C@@H](CCCN=C(N)N)C(=O)O)N)O	276.16739:2881244 277.17074:345571 278.1741:32561	50.97171:2269 56.04989:2843 60.05257:2721 60.05598:82729 60.73121:2189 63.78146:2147 70.06533:149026 71.04955:2931 72.08099:13646 74.0602:104963 84.04462:15889 84.37831:2454 88.07606:4523 96.12546:2353 98.0719:3652 100.05079:53626 102.05481:3420 102.33829:2299 111.48458:2315 112.0872:54203 112.09522:4420 113.07118:13405 114.10281:9052 115.08688:60214 116.07092:74719 119.08162:3501 126.06575:5763 …	0	307404	667341	2334131	1823309	785388	1520186	3064338	616574	954388	1617561	10480961	6275834	3355103	2495151	3842688	2517886	2218628	172934	423546	1941394	2405347	2263693	2370711
Thr-Pro	lvl 2A	8.237	215.102	MS & library MS/MS match	[M-H]-	HILIC-	Food Cluster 4	Amino acids, peptides, and analogues	QOLYAJSZHIJCTO-VQVTYTSYSA-N	C[C@H]([C@@H](C(=O)N1CCC[C@H]1C(=O)O)N)O	215.10243:997850 216.10578:101355 217.10914:411593	57.16302:2242 59.01217:2466 68.29201:2321 71.01205:2995 75.00751:2008 96.04404:2841 101.38596:2059 114.05445:129468 114.06349:4619 125.05946:2840 126.42397:1968 127.08625:4867 129.0179:2890 135.04411:2150 153.0542:2900 171.07603:147357 192.66013:2315 197.04402:2523 215.00847:43771 215.054:4097 215.10252:119649	0	678	42913	42727	3531	17015	73917	56166	55851	53027	62866	374969	261190	62443	169371	101280	246302	105609	20126	114956	167843	239056	229849	262884
Trp-Arg	lvl 2A	8.882	361.199	MS & library MS/MS match	[M+H]+	HILIC+	Food Cluster 4	Amino acids, peptides, and analogues	LCPVBXOHXMBLFW-JSGCOSHPSA-N	C1=CC=C2C(=C1)C(=CN2)C[C@@H](C(=O)N[C@@H](CCCN=C(N)N)C(=O)O)N	361.19937:4305845 362.20272:1125628 363.20608:114501	50.81334:2884 60.05599:105487 70.06538:212169 72.08091:14839 97.0764:4357 100.0508:45798 112.08735:87917 113.07111:4265 114.10274:16408 115.08709:33125 116.07092:77377 126.9509:2952 130.06572:33640 130.09787:26587 132.08107:48082 138.06674:4026 140.08217:27374 142.06624:5039 143.08258:3332 144.08217:3580 150.98352:2726 157.10878:67363 158.09299:84117 159.0921:288793 163.05954:2983 170.06046:49929…	21574	251644	1289372	3060969	805305	924428	1564138	3056366	887632	1501008	1625776	4337692	2234365	3194548	2461870	5427782	3822363	4305845	625754	904475	2315506	2603433	2669640	2573596
Tyr-Pro	lvl 2A	7.588	279.135	MS & library MS/MS match	[M+H]+	HILIC+	Food Cluster 4	Amino acids, peptides, and analogues	VNYDHJARLHNEGA-RYUDHWBXSA-N	C1C[C@H](N(C1)C(=O)[C@H](CC2=CC=C(C=C2)O)N)C(=O)O	279.13467:1071331 280.13802:221320 281.14138:0	70.06535:45861 72.91484:1975 91.05425:4413 114.05505:17587 116.07086:402317 119.04933:14170 121.06531:9489 123.81803:2130 136.07603:383797 147.04445:14732 149.02383:9403 234.1123:3400 238.57278:2403 257.54703:2290 262.10791:16148 279.09943:5794 279.13446:106469	0	0	62029	174035	0	6058	134699	87007	6173	44269	220242	2555361	1147235	150497	82698	179412	569368	241669	0	29825	322184	282121	293634	338689
3-Aminophenol	lvl 2A	1.501	110.06	MS & library MS/MS match	[M+H]+	HILIC+	Food Cluster 5	Aniline and substituted anilines	CWLKGDAVCFYWJK-UHFFFAOYSA-N	C1=CC(=CC(=C1)O)N	110.06026:1280606 111.06361:168371 112.06697:0	65.03886:69881 66.04759:2087 72.51958:1823 72.60741:2011 82.06538:26904 92.04972:50567 93.03372:23772 93.05762:2245 109.0527:3130 110.06033:502883	3041827	1286339	19467	14991	1272226	1746089	2142256	1895504	1280606	1253818	944033	867962	993978	470554	1159155	953898	226997	272346	208799	666598	510312	523439	577454	640948
4-Methyl-5-thiazoleethanol	lvl 2A	1.345	144.048	MS & library MS/MS match	[M+H]+	HILIC+	Food Cluster 5	Thiazoles	BKAWJIRCKVUVED-UHFFFAOYSA-N	CC1=C(SC=N1)CCO	144.04803:757682 145.05138:0 146.05474:0	54.27436:1741 61.69379:1925 75.84212:1752 88.07578:2728 91.84418:2000 113.02945:34931 114.03751:3164 126.03723:32506 144.048:354076	114707	19563	0	13954	19416	0	0	0	0	0	0	0	0	0	0	0	0	0	0	0	0	0	4900	6909
5-Hydroxymethyl-2-furancarboxylic acid	lvl 2A	6.168	141.018	MS & library MS/MS match	[M-H]-	HILIC-	Food Cluster 5	Furoic acid and derivatives	PCSKKIUURRTAEM-UHFFFAOYSA-N	C1=C(OC(=C1)C(=O)O)CO	141.01773:1656234 142.02108:107743 143.02444:33946	57.31694:1879 69.03292:24521 93.80593:1917 97.02765:25760 141.01915:4793	23519	21294	23568	25016	87046	69912	63489	177139	20650	18445	31506	37372	57638	46884	17662	13776	16465	19029	19272	19105	45006	41655	42967	44951
Adenosine	lvl 2A	5.134	268.105	MS & library MS/MS match	[M+H]+	HILIC+	Food Cluster 5	Purine 2'-deoxyribonucleosides	NDWAUKFSFFRGLF-YRZWDFBDSA-N	C1[C@@H]([C@H](OC1N2C3=C(C(=NC=N3)N)NC2=O)CO)O	268.10477:20915144 269.10812:2375073 270.11148:242595	55.01832:62916 57.03381:168191 57.35984:14571 61.02876:18374 61.96935:14589 62.06056:13923 69.03384:31039 69.36159:14477 71.01329:23161 73.02863:128554 85.02866:153394 97.02885:61196 103.03905:17964 115.03944:145614 133.05002:198413 136.0621:17152052 143.06194:16285 202.87035:25109 268.10474:4442626	617554	309694	40565	101441	494012	81888	200511	13414	133955	33495	19055	0	15767	28107	26088	0	8458	10767	0	36685	48564	21460	56976	16023
Digalacturonic acid	lvl 2A	10.303	369.066	MS & library MS/MS match	[M-H]-	HILIC-	Food Cluster 5		SYBQLSSECRIKMJ-ONIUFBCKSA-N	C(=O)C(C(C(C(C(=O)O)O)OC1C(C(C(C(O1)C(=O)O)O)O)O)O)O	369.06628:240758 370.06963:34397 371.07299:4356	53.83786:2675 59.01244:5188 62.27152:2238 63.77051:2680 69.12891:2268 71.01223:8473 72.99165:16200 73.02808:13115 85.0281:9469 89.02267:3775 101.02242:7000 103.002:2336 103.71761:2034 113.02271:23020 115.00204:33991 129.01775:2842 131.03349:12628 157.01228:4167 175.02307:18743 193.03406:16703 235.04523:4654 309.04605:9311 369.06625:3679	1863	465	0	100664	376532	240758	249177	180910	14558	632	1047	0	0	912	885	0	0	0	0	0	28327	39938	39198	46424
Gly-Ser-Arg	lvl 2A	9.932	319.173	MS & library MS/MS match	[M+H]+	HILIC+	Food Cluster 5	Amino acids, peptides, and analogues	YOBGUCWZPXJHTN-UHFFFAOYSA-N	C(CC(C(=O)O)NC(=O)C(CO)NC(=O)CN)CN=C(N)N	319.17334:1794802 320.17669:272308 321.18005:33479	57.19528:2423 60.04472:11455 60.056:33272 64.23189:2302 65.90041:2254 69.04482:13013 70.06534:81374 72.08092:8657 75.01364:2227 99.05563:25891 100.05125:3141 112.08717:42954 113.07114:14817 114.10336:8538 115.08706:33015 116.07096:78220 117.06624:40898 127.0504:4400 130.06155:23335 130.09825:19423 133.09781:9367 136.91245:2539 145.06117:40105 152.08151:2847 157.10982:3811 158.09291:155999 175.119…	0	49412	8910	0	1794802	292250	0	457634	0	0	0	0	0	0	0	0	0	0	0	0	62769	46054	66983	41894
Heptadecasphing-4-enine	lvl 2A	4.831	286.275	MS & library MS/MS match	[M+H]+	HILIC+	Food Cluster 5	Amines	RBEJCQPPFCKTRZ-CRUCTFTKSA-N	CCCCCCCCCCCC/C=C/C([C@H](CO)N)O	286.27472:2823363 287.27807:768336 288.28143:70887	53.96666:2542 55.05465:23412 56.04692:4287 56.04983:63436 57.03378:3638 57.07027:24197 58.02906:9126 60.0447:4998 69.07005:39889 70.06532:3258 70.4035:2450 71.08574:16944 72.04452:2685 74.06033:2985 79.05416:16674 81.07008:33247 82.06521:14827 83.04893:10535 83.0857:35886 85.02824:3079 85.10118:5347 86.06016:5366 88.34418:2229 93.07014:20306 95.08578:38733 96.08093:10072 97.06516:2918 97.09512:24…	13992698	9969663	419733	1142845	5384571	4407712	3347328	1019714	624122	825496	1258288	1516058	1154040	1583309	1368101	2042017	2974991	4325294	1949122	1799567	2712055	2700343	2912741	2901248
Leu-Leu-Lys	lvl 2A	8.389	373.282	MS & library MS/MS match	[M+H]+	HILIC+	Food Cluster 5	Amino acids, peptides, and analogues	LXKNSJLSGPNHSK-UHFFFAOYSA-N	CC(C)CC(C(=O)NC(CC(C)C)C(=O)NC(CCCCN)C(=O)O)N	373.28201:675614 374.28536:114220 375.28872:0	56.98592:2149 61.19861:2718 61.74299:2569 64.09111:2418 65.76289:2059 70.06513:21188 84.08105:56284 84.7289:2272 86.0966:205093 89.10007:1989 91.66101:2115 101.10722:2804 105.33442:2346 128.05125:2360 128.88858:2619 129.10263:133407 130.07669:3224 130.08676:67516 147.11314:171489 174.71982:2185 177.08777:2532 197.12798:3048 197.16516:2937 199.10913:3778 199.18115:118734 199.20204:4739 227.17613:2…	197836	565815	68284	10590	675614	35328	6855	20465	0	0	0	9762	0	0	0	13038	0	0	0	0	102230	88096	103219	96524
Leu-Val-Lys	lvl 2A	8.866	359.266	MS & library MS/MS match	[M+H]+	HILIC+	Food Cluster 5	Amino acids, peptides, and analogues	YQFZRHYZLARWDY-UHFFFAOYSA-N	CC(C)CC(C(=O)NC(C(C)C)C(=O)NC(CCCCN)C(=O)O)N	359.2662:4051118 360.26955:873223 361.27291:107180	55.05471:3994 56.03203:2378 57.058:2332 59.5323:2971 60.05597:10350 69.07003:12542 70.06536:19864 72.08097:158446 84.08099:144223 86.0966:633673 101.10795:13362 112.08715:5322 125.47529:2469 129.10251:217587 130.07527:6255 130.07756:5296 130.08659:295851 147.11319:752900 157.13426:20558 157.17114:3740 158.09282:11600 169.09967:3238 175.11937:37875 183.12576:3115 185.16536:483523 213.16023:155851 …	7520	123385	0	0	4051118	146720	49285	8128	0	0	0	0	0	0	0	0	7011	0	0	0	208820	258704	266153	300619
L-Gulono-1,4-lactone	lvl 2A	4.464	177.039	MS & library MS/MS match	[M-H]-	HILIC-	Food Cluster 5	Gamma butyrolactones	SXZYCXMUPBBULW-SKNVOMKLSA-N	C([C@@H]([C@@H]1[C@@H]([C@@H](C(=O)O1)O)O)O)O	177.03899:1607212 178.04234:97380 179.0457:130799	54.53399:1982 57.033:38971 59.01227:143100 59.42054:1854 67.42862:2242 68.99659:2591 71.01225:85061 72.99139:11160 73.02794:2065 75.00713:38469 83.01221:9146 85.02778:32819 87.00734:15430 88.27621:2089 89.0228:83532 97.02788:3466 99.00728:40132 100.06878:1900 101.02251:2905 111.00701:27114 111.15067:1658 113.02271:7966 117.01763:10616 128.11096:1931 129.01779:85766 131.03317:3601 131.58522:2441 1…	122340	74589	5172	227010	976968	179827	138962	39935	21068	14011	50824	41811	55787	32025	22001	12289	4855	29317	11281	19847	53884	59513	66006	69401
(2R)-3-Hydroxyisovaleroylcarnitine	lvl 2A	7.291	262.166	MS & library MS/MS match	[M+H]+	HILIC+	Food Cluster 6	Fatty acid esters	IGLHHSKNBDXCEY-SECBINFHSA-N	CC(C)(CC(=O)O[C@H](CC(=O)[O-])C[N+](C)(C)C)O	262.16565:722790 263.169:56049 264.17236:0	59.04966:8211 60.08112:35359 64.91071:2357 65.65807:1947 78.15282:2137 82.79318:2336 85.02858:291999 87.08247:2546 118.08621:2472 119.48552:2020 134.33882:2336 138.10298:2347 144.10202:10964 145.04997:97657 147.52718:2679 185.08182:15967 201.65132:3619 204.12354:2489 262.05319:12254 262.16556:409508	0	0	0	0	0	0	0	14917	8676	0	29400	0	18779	8837	0	10675	722790	530586	11195	0	55231	51880	109110	65891
2,6-Dihydroxybenzoic acid	lvl 2A	1.121	153.018	MS & library MS/MS match	[M-H]-	HILIC-	Food Cluster 6	Benzoic acids and derivatives	AKEUNCKRJATALU-UHFFFAOYSA-N	C1=CC(=C(C(=C1)O)C(=O)O)O	153.01759:763441 154.02094:87756 155.0243:27002	65.03822:14027 67.01714:3474 71.75674:1911 78.55716:1976 91.01707:2403 109.02774:259028 113.33327:2175 114.37429:2269 135.00696:83868 153.01753:312522	11041	18579	30784	135868	184511	155488	170051	216131	141387	184790	198614	875432	749592	249384	184684	200986	2973812	1423854	225085	295866	351387	465932	455891	487844
3'-Sialyllactose	lvl 2A	9.803	632.203	MS & library MS/MS match	[M-H]-	HILIC-	Food Cluster 6	Carbohydrates and carbohydrate conjugates	CILYIEBUXJIHCO-KZWSUNNPSA-N	CC(=O)N[C@@H]1[C@H](C[C@@](O[C@H]1C(C(CO)O)O)(C(=O)O)OC2[C@H]([C@H](O[C@H]([C@@H]2O)OC3[C@H](OC([C@@H]([C@H]3O)O)O)CO)CO)O)O	632.20325:447475 633.2066:142784 634.20996:40304	53.3925:2815 55.01729:3908 58.02815:4159 59.01233:11373 68.35112:2684 71.01221:13427 73.8563:2631 83.01205:11386 85.15321:2947 87.00719:116282 91.64597:2592 95.01257:3191 100.03878:4718 101.02296:6642 113.02274:24743 119.03342:5689 126.05411:22475 138.05513:10504 140.07008:3177 142.0493:17669 144.50037:3165 150.05411:3299 154.05023:3283 161.04366:3166 168.06534:14561 170.04436:4993 198.7077:10729…	0	0	0	0	0	0	0	3156	10825	10227	25460	15469	13096	0	0	0	447475	544800	117210	142613	51235	70393	66024	95633
FAHFA 18:1/18:0	lvl 2A	6.04	563.503	MS & library MS/MS match	[M-H]-	CSH-	Food Cluster 6	Fatty acids and conjugates	PGKKGBQMNNEIHV-PFONDFGANA-N	CCCCCCCCCC(CCCCCCCC(O)=O)OC(=O)CCCCCCC\C=C/CCCCCCCC	563.50293:442962 564.50628:139064 565.50964:0	70.63387:2643 93.79979:2608 98.65026:2236 107.6162:2490 155.14946:2878 272.90073:2782 281.24762:209730 299.25772:35499 563.50385:40624	0	0	0	0	0	0	0	11429	7087	0	31830	0	0	0	0	0	16972	0	0	0	28269	32075	35117	41573
Galacto/Lacto-N-biose	lvl 2A	8.879	406.133	MS & library MS/MS match	[M+Na]+	HILIC+	Food Cluster 6	Carbohydrates and carbohydrate conjugates	HMQPEDMEOBLSQB-UITYFYQISA-N	CC(=O)N[C@@H]1[C@H]([C@H]([C@H](OC1O)CO)O)O[C@H]2[C@@H]([C@H]([C@H]([C@H](O2)CO)O)O)O	406.13318:1282352 407.13653:241929 408.13989:32198	200.88371:4387 203.05347:43941 226.06931:171439 244.07744:3881 257.75995:2464 261.33871:2215 266.71793:2521 286.09332:3325 346.11151:28096 350.03757:2525 388.12314:11172 406.13309:1077667	0	10019	0	0	7430	6153	0	7994	27908	33077	103690	0	0	0	8864	10252	3239397	3796678	1167224	1282352	218711	215574	212833	217538
Gly-Pro-Glu	lvl 2A	8.8	300.119	MS & library MS/MS match	[M-H]-	HILIC-	Food Cluster 6	Amino acids, peptides, and analogues	JJGBXTYGTKWGAT-UHFFFAOYSA-N	C1CC(N(C1)C(=O)CN)C(=O)NC(CCC(=O)O)C(=O)O	300.11905:319819 301.1224:73510 302.12576:65988	84.04377:4816 102.05481:11715 114.05476:13033 115.08626:3717 128.03365:72594 128.04465:2416 146.04425:16396 147.85474:2507 153.06514:26923 167.0451:27041 170.09232:9786 171.07614:65593 210.25354:2165 212.13963:2563 256.12854:16760 271.40353:2209 300.11884:63672	0	0	13931	11868	0	2809	7841	11040	10507	6536	64122	54823	45938	26761	20288	33773	319819	138551	6452	106508	29874	42312	42413	50296
Lacto-N-triaose	lvl 2A	9.554	546.205	MS & library MS/MS match	[M+H]+	HILIC+	Food Cluster 6	Carbohydrates and carbohydrate conjugates	CJOPBLPCFAQCNO-UHFFFAOYSA-N	CC(=O)NC1C(C(C(OC1OC2C(C(OC(C2O)O)CO)O)CO)O)OC3C(C(C(C(O3)CO)O)O)O	546.20447:651077 547.20782:129486 548.21118:0	60.04481:12412 70.06588:2881 73.17552:2245 73.40744:2477 78.71731:2288 84.04446:25643 85.00967:2481 96.04467:4544 97.02824:3869 98.06049:4370 98.31634:2550 108.04462:2886 126.05524:142478 138.05531:39848 144.06604:46510 153.79698:2483 168.0661:18540 186.07654:76245 202.28563:3834 204.08734:207834	0	0	28731	0	0	0	0	6352	9629	22865	160078	243640	182609	5341	0	0	2082753	2160742	351034	397924	184654	219279	177711	196558
N-Acetyl-D-lactosamine	lvl 2A	8.377	406.133	MS & library MS/MS match	[M+Na]+	HILIC+	Food Cluster 6	Fatty acyl glycosides	HESSGHHCXGBPAJ-ZBELOFFLSA-N	CC(=O)N[C@@H](C=O)[C@H]([C@@H]([C@@H](CO)O)O[C@H]1[C@@H]([C@H]([C@H]([C@H](O1)CO)O)O)O)O	406.1329:2486208 407.13625:494593 408.13961:193031	61.66788:2219 64.66788:2374 185.04289:5913 200.94991:5058 203.05261:34624 208.05882:15375 226.06889:21823 244.08031:37607 245.0645:4951 301.70502:2682 305.08499:74671 328.10162:5464 346.10947:3745 352.83069:2796 388.12198:175805 406.13269:1763631	31087	163424	31482	112787	19734	45896	56709	138692	117798	215531	513773	105402	103119	108725	62570	140754	8218730	11228665	1263803	2857096	1251684	1110795	998909	1086542
DG 26:0	lvl 2A	4.943	507.404	MS & library MS/MS match	[M+Na]+	CSH+	Food Cluster 7		LXZPDGPEMPLRJJ-UHFFFAOYNA-N	CCCCCCCCCCCCCCCCCC(=O)OC(CO)COC(=O)CCCCCCC	507.40411:944762 508.40746:450182 509.41082:42970	72.69449:2676 101.9785:2551 103.10033:2713 196.86375:19302 342.99164:2541 503.17599:2546 507.40381:212986	34258	58711	9680	12128	0	4791	0	0	5696	0	14576	0	0	25820	0	0	11035	0	14297	123045	151455	215649	194132	220143
DG 30:0|DG 14:0_16:0	lvl 2A	6.28	558.512	MS & library MS/MS match	[M+NH4]+	CSH+	Food Cluster 7	Diacylglycerols	NYNQTTOUQMCOEM-UHFFFAOYNA-N	CCCCCCCCCCCCCCCC(=O)OC(CO)COC(=O)CCCCCCCCCCCCC	558.51172:1218199 559.51507:521497 560.51843:112297	71.08585:15562 72.70795:2589 81.06975:4660 83.08571:2527 85.10133:13954 95.08596:10632 96.48828:2673 109.10181:5803 113.2661:2941 149.09865:2395 154.03749:2613 285.24365:61892 296.21878:2722 313.27499:46314 354.10559:2750 523.47418:38798	0	0	0	0	5848	0	0	0	0	0	0	0	0	6663	0	0	5767	0	19917	73454	115240	193385	152449	210854
DG 32:2|DG 16:0_16:2	lvl 2A	5.806	582.512	MS & library MS/MS match	[M+NH4]+	CSH+	Food Cluster 7		DUTDCXZPOSRTTA-UDJAPEQQNA-N	CCCCCCCCCCCCCCCC(=O)OCC(CO)OC(=O)CCCCCCC\C=C/C\C=C/CCC	582.51178:981597 583.51513:378399 584.51849:52773	71.08582:4756 78.41741:2317 79.1291:2490 81.07027:14735 83.08565:3281 85.10141:6488 95.08582:19039 109.1017:15213 123.11755:4950 187.50098:3077 203.59444:2999 235.20775:4294 239.23792:3172 306.18637:2733 309.24338:71858 313.27481:78505 333.7128:2821 380.08035:3042 547.47443:47310	0	0	0	0	0	0	0	347614	0	0	6267	0	0	29710	0	0	23809	0	14568	15406	181471	293859	286469	279576
Phe-Phe	lvl 2A	5.906	311.139	MS & library MS/MS match	[M-H]-	HILIC-	Food Cluster 7	Amino acids, peptides, and analogues	GKZIWHRNKRBEOH-HOTGVXAUSA-N	C1=CC=C(C=C1)C[C@@H](C(=O)N[C@@H](CC2=CC=CC=C2)C(=O)O)N	311.13901:342239 312.14236:63654 313.14572:4708	71.02342:28008 78.23253:1931 86.26249:2162 91.05359:15073 95.8079:2127 104.56639:2339 146.05933:8636 147.04361:20680 163.08626:9465 164.0705:24826 175.08627:30580 183.00964:2481 250.12225:4673 311.13837:86159 311.16934:37426	186676	203099	119501	45628	28338	32305	133789	119556	44504	33395	27280	54222	50746	57607	119205	42277	113664	42188	297602	142670	81401	96689	103376	112025
TG 48:2|TG 12:0_18:1_18:1	lvl 2A	10.129	825.698	MS & library MS/MS match	[M+Na]+	CSH+	Food Cluster 7	Triacylglycerols	SJWUGKDDADDDHD-YPAXQUSRNA-N	CCCCCCCCCCCC(=O)OCC(COC(=O)CCCCCCC\C=C/CCCCCCCC)OC(=O)CCCCCCC\C=C/CCCCCCCC	825.69849:772040 826.70184:488221 827.7052:124846	70.64762:3579 81.07033:3393 83.08598:4760 85.10191:4295 88.50613:2905 95.08591:7726 96.20634:3212 97.10159:3929 109.10167:3555 111.1179:3671 183.17467:4691 202.53802:3925 207.86263:3449 446.76556:4174 521.45825:21496 543.43756:23184 603.53778:5658 625.52069:6641 686.00696:3762 825.69757:362132	0	0	0	0	0	0	6653	217141	0	0	0	0	0	31955	0	4644	0	6956	9899	73858	295353	368634	450843	438998
TG 48:2|TG 14:0_16:0_18:2	lvl 2A	10.133	820.742	MS & library MS/MS match	[M+NH4]+	CSH+	Food Cluster 7		YUIIXXZIUIOJQY-IZGAEGEENA-N	CCCCCCCCCCCCCCCC(=O)OC(COC(=O)CCCCCCCCCCCCC)COC(=O)CCCCCCC\C=C/C\C=C/CCCCC	820.7428:2770848 821.74615:2045226 822.74951:657984	71.08578:84919 75.87129:3266 79.05441:28687 81.07019:136913 81.07563:4793 83.08588:59292 84.11282:3220 85.06496:5668 85.10145:73633 91.05456:17234 93.07024:27879 95.08588:166236 96.47456:3995 97.10169:36084 97.1079:3995 105.07021:6965 107.08633:11757 109.10166:105369 110.67664:4216 111.11722:8596 112.57478:3558 119.08599:5995 121.10186:18322 123.11719:52621 125.13316:4740 133.10176:17516 135.1176…	0	5787	0	0	0	0	0	148072	0	0	0	0	0	8594	0	0	0	0	0	58264	146974	202625	216883	267570
TG 50:0|TG 16:0_16:0_18:0	lvl 2A	11.335	852.806	MS & library MS/MS match	[M+NH4]+	CSH+	Food Cluster 7	Triacylglycerols	DQKMNCLZNGAXNX-UHFFFAOYNA-N	CCCCCCCCCCCCCCCCCC(=O)OCC(COC(=O)CCCCCCCCCCCCCCC)OC(=O)CCCCCCCCCCCCCCC	852.80566:14267061 853.80901:10629493 854.81237:3114816	71.08582:748225 71.09028:25110 79.0542:11723 81.07019:520895 83.08583:415081 85.06512:17114 85.10151:587959 95.0859:801004 97.10159:289428 99.08073:12317 99.11702:61194 109.09347:16940 109.10162:475708 111.11721:112500 113.13268:13775 116.6611:9876 118.74825:10066 123.11732:222704 125.13284:53412 137.13309:118416 151.14851:49238 165.16492:17853 177.20551:11230 200.4781:16988 221.22728:42784 231.5…	27193	31530	19762	19476	8183	0	22032	187108	19062	12579	9147	34436	129493	90023	67952	34225	46698	14175	33369	72118	97674	304755	378177	295192
TG 50:2|TG 14:0_18:1_18:1	lvl 2A	10.557	853.729	MS & library MS/MS match	[M+Na]+	CSH+	Food Cluster 7	Triacylglycerols	AFLXUGKIZQFJJI-DSOYXUETNA-N	CCCCCCCCCCCCCC(=O)OCC(COC(=O)CCCCCCC\C=C/CCCCCCCC)OC(=O)CCCCCCC\C=C/CCCCCCCC	853.7298:1829062 854.73315:1222631 855.73651:361922	71.08585:8632 79.05455:3579 81.07016:22630 82.48792:3475 83.08556:16550 85.1012:6068 93.07043:5211 95.08582:31302 97.1013:16793 100.26898:3170 109.10114:13838 121.10201:15847 123.11711:6127 127.65376:3819 128.77789:3387 135.11736:6244 149.13239:5323 202.54875:5234 211.20612:5047 247.24834:4374 265.2532:5598 440.81812:3860 549.4895:44608 571.47168:52381 599.50385:5793 603.53625:14639 625.51733:243…	13274	15027	0	24526	0	9764	16447	3122666	14867	0	0	6468	8636	247771	8039	12888	15804	14348	39457	157467	599437	898224	1057661	1254567
TG 50:2|TG 16:0_16:0_18:2	lvl 2A	10.596	853.729	MS & library MS/MS match	[M+Na]+	CSH+	Food Cluster 7	Triacylglycerols	MTWYSKGJIDFSRC-DHSNEXAONA-N	CCCCCCCCCCCCCCCC(=O)OCC(COC(=O)CCCCCCC\C=C/C\C=C/CCCCC)OC(=O)CCCCCCCCCCCCCCC	853.72968:10635498 854.73303:7017098 855.73639:2341469	71.08581:103601 71.63228:8147 79.05436:30872 80.70093:7617 81.07021:167996 83.0858:70966 85.10146:83954 93.07052:18393 95.08581:193067 97.10138:62953 106.55418:7453 107.08569:11560 109.10166:115469 113.3393:8800 121.10124:15708 123.11755:41109 123.1785:7630 137.13351:33557 150.57768:8459 197.0033:52052 205.37471:8997 239.23807:47287 263.23898:11715 286.4043:8091 383.24759:8467 551.5061:130030 573…	54885	55845	6257	24526	20560	9764	16447	807223	22028	22047	0	6468	17425	247771	8039	12888	15804	14348	39457	165764	599437	898224	1057661	1254567
TG 50:3|TG 14:0_18:1_18:2	lvl 2A	10.177	851.714	MS & library MS/MS match	[M+Na]+	CSH+	Food Cluster 7		LVCDKQHOIIGWET-ZBYKIPMZNA-N	CCCCCCCCCCCCCC(=O)OCC(COC(=O)CCCCCCC\C=C/C\C=C/CCCCC)OC(=O)CCCCCCC\C=C/CCCCCCCC	851.71429:1272144 852.71764:834505 853.721:238496	81.07018:20533 83.0859:4968 85.10156:3509 95.08596:21150 97.10201:4055 109.10186:14689 121.10114:5066 123.11739:5145 149.1337:3641 149.45219:3725 203.10312:3695 211.20737:3507 221.25963:3389 304.20416:4182 357.10855:3670 547.47791:7515 549.48871:13684 569.45679:18979 571.47552:22720 601.52075:6052 623.50293:16618 851.71338:548086	7199	0	0	0	0	0	0	1214903	0	0	0	0	0	55178	0	0	0	0	0	4043	260810	400177	388269	452045
TG 52:1|TG 16:0_18:0_18:1	lvl 2A	11.351	883.777	MS & library MS/MS match	[M+Na]+	CSH+	Food Cluster 7	Triacylglycerols	NPCZZYKITFKRQZ-RFBIWTDZNA-N	CCCCCCCCCCCCCCCCCC(=O)OC(COC(=O)CCCCCCCCCCCCCCC)COC(=O)CCCCCCC\C=C/CCCCCCCC	883.77679:1511433 884.78014:1023726 885.7835:323960	71.08578:21368 81.07016:20443 83.08576:16934 85.10148:7440 95.08591:26091 97.10155:8372 109.10157:18786 123.11771:5038 135.11723:4526 152.00294:3521 153.86525:3566 237.92546:3696 289.07166:4258 292.28387:4144 577.52203:37317 579.53809:17265 599.50385:37052 601.52063:24211 605.55511:23654 627.53381:29596 849.68488:5686 883.77606:875753	35459	78872	26417	27281	26882	32262	22220	1557593	48170	22861	33997	17960	15721	263174	0	30036	43615	29484	37922	79570	463953	511752	581775	644632
TG 52:2|TG 16:0_18:0_18:2	lvl 2A	10.982	876.806	MS & library MS/MS match	[M+NH4]+	CSH+	Food Cluster 7	Triacylglycerols	MDCUASFVKLEFPW-OXQPSHBUNA-N	CCCCCCCCCCCCCCCCCC(=O)OC(COC(=O)CCCCCCCCCCCCCCC)COC(=O)CCCCCCC\C=C/C\C=C/CCCCC	876.80585:10954412 877.8092:8048202 878.81256:2726200	71.08582:201571 71.08977:11150 79.05457:74195 79.05909:10081 81.07021:446461 81.07524:24442 83.08585:320081 83.091:18590 85.06456:11143 85.10148:193212 85.10675:9729 87.51805:5684 91.05397:23019 93.07034:103837 95.0859:552730 95.09241:24777 97.06449:12874 97.10161:204481 99.08025:12342 99.11633:9926 105.06941:11847 107.086:73257 109.10165:281738 111.08035:11561 111.11732:87384 113.09544:7802 119.…	78772	51441	42187	30719	43888	36568	24182	281336096	371776	93459	155126	52641	29368	5559642	245418	50346	24807	20529	82920	101780	8333320	12673676	14817022	17545528
TG 52:3|TG 16:0_18:1_18:2	lvl 2A	10.616	874.79	MS & library MS/MS match	[M+NH4]+	CSH+	Food Cluster 7	Triacylglycerols	KGLAHZTWGPHKFF-FBSASISJNA-N	CCCCCCCCCCCCCCCC(=O)OCC(COC(=O)CCCCCCC\C=C/C\C=C/CCCCC)OC(=O)CCCCCCC\C=C/CCCCCCCC	874.79028:18894350 875.79363:11524837 876.79699:7463248	71.08583:373843 79.05455:218718 81.07021:1197643 83.08584:626177 85.06515:26490 85.10151:304144 91.0545:90077 93.07033:269225 95.04947:16403 95.0859:1314083 95.14491:13642 97.06485:33054 97.1017:395805 99.08098:23753 99.11728:20698 105.07008:68528 107.08591:267369 109.09341:24638 109.10165:658714 111.08096:22042 111.11716:160590 113.09621:22052 119.08592:93663 121.10163:387914 123.1172:384587 125…	23347	24984	0	0	31036	9164	0	103582320	103110	17652	20052	0	8606	2094950	22766	17268	8181	10130	53795	72160	2127058	2627726	3148921	3524800
TG 52:4|TG 16:0_18:2_18:2	lvl 2A	10.246	872.774	MS & library MS/MS match	[M+NH4]+	CSH+	Food Cluster 7	Triacylglycerols	LXAWUIOWWNQCQA-YBQWMRSQNA-N	CCCCCCCCCCCCCCCC(=O)OCC(COC(=O)CCCCCCC\C=C/C\C=C/CCCCC)OC(=O)CCCCCCC\C=C/C\C=C/CCCCC	872.7746:2642896 873.77795:1487400 874.78131:497619	71.04922:4351 71.08585:59139 79.05451:49974 81.0702:227961 83.08583:80256 85.06492:6442 85.10143:49462 91.05463:31088 93.0701:56795 95.04953:4343 95.08586:231984 97.06491:6895 97.10174:39625 99.08092:4119 105.07011:25544 107.08554:36015 109.10159:117604 111.08051:6832 111.11703:7351 116.95766:3856 119.08585:17631 121.02346:4253 121.10175:46836 123.11716:75932 131.086:4953 133.10193:30520 135.1173…	21064	11634	0	0	11441	0	0	10285595	0	0	0	0	0	342562	0	0	0	0	7633	23263	240398	394079	408499	524271
TG 52:4|TG 16:1_18:1_18:2	lvl 2A	10.238	877.729	MS & library MS/MS match	[M+Na]+	CSH+	Food Cluster 7	Triacylglycerols	WHSWXEYWNPTUPW-KPJCRDJJNA-N	CCCCCCCC\C=C/CCCCCCCC(=O)OC(COC(=O)CCCCCCC\C=C/CCCCCC)COC(=O)CCCCCCC\C=C/C\C=C/CCCCC	877.72992:3459432 878.73327:2179050 879.73663:615011	71.08572:5928 79.05459:6109 79.23721:3428 81.07016:66430 83.04871:3866 83.0858:27912 85.10139:6393 88.38915:3706 91.05453:8802 93.07028:18785 95.08591:66966 95.15425:3865 97.10156:14542 107.08622:8123 109.10139:30362 111.11716:5187 121.102:19994 123.11748:20434 133.10175:6239 135.11778:16939 137.13341:5544 147.94012:4189 149.13304:6195 161.13396:4797 180.65269:3687 239.23689:4855 263.23956:8658 2…	70191	40340	0	0	44016	9910	12791	5462728	8201	13292	7738	0	0	621904	7913	0	6886	0	48605	92373	574634	702377	777406	900367
TG 54:2|TG 16:0_20:0_18:2	lvl 2A	11.367	909.792	MS & library MS/MS match	[M+Na]+	CSH+	Food Cluster 7	Triacylglycerols	KWUMWJZHUAQZMT-ULSWSFLHNA-N	CCCCCCCCCCCCCCCCCCCC(=O)OCC(COC(=O)CCCCCCCCCCCCCCC)OC(=O)CCCCCCC\C=C/C\C=C/CCCCC	909.79248:2901138 910.79583:1560702 911.79919:472145	71.08578:25175 73.67153:3567 74.01651:4056 81.07014:48084 83.08576:17652 85.10145:25008 93.06998:4737 95.08599:41054 97.10143:19056 107.08593:4466 109.10149:33200 111.1172:4151 119.0864:3723 121.10167:4249 123.11739:17236 203.59689:5509 263.23801:6778 271.21332:3723 343.21381:4799 575.50446:32594 597.48773:54240 599.58875:4646 603.54114:25012 607.56787:34502 625.52014:48014 629.55164:43607 631.56…	18662	8080	0	10698	0	7007	0	7582052	83902	20674	30624	0	7617	1182233	9220	9786	0	12533	68246	15932	1682199	1866384	2418021	2465270
TG 54:4|TG 18:0_18:1_18:3	lvl 2A	10.689	905.76	MS & library MS/MS match	[M+Na]+	CSH+	Food Cluster 7	Triacylglycerols	BRLGHZXETDWABO-HJBVGWKNNA-N	CCCCCCCCCCCCCCCCCC(=O)OCC(COC(=O)CCCCCCC\C=C/C\C=C/C\C=C/CC)OC(=O)CCCCCCC\C=C/CCCCCCCC	905.76117:2279130 906.76452:1554556 907.76788:466750	71.08591:9236 76.08028:3769 79.05461:8466 81.07024:41286 83.08588:16313 85.1017:4336 93.0703:17396 95.08572:38495 97.10153:8292 97.29251:3855 98.83359:3600 100.94803:4785 105.07034:4200 107.08571:5959 109.10162:8690 111.11729:6485 121.10189:20308 123.11731:8722 133.10153:4685 135.11755:6054 137.13254:3783 233.16362:4229 599.50616:28953 601.52234:23264 602.3703:4449 603.53467:29041 605.55414:20367…	47281	30505	19431	7514	37837	27623	19292	13486844	178624	85805	34858	0	0	2560409	7695	4147	0	18361	116226	122438	1699313	6255637	7271620	7930717
TG 54:4|TG 18:1_18:1_18:2	lvl 2A	10.635	900.806	MS & library MS/MS match	[M+NH4]+	CSH+	Food Cluster 7	Triacylglycerols	JTMWOTXEVWLTTO-KTKRTRQNNA-N	CCCCCCCC\C=C/CCCCCCCC(=O)OCC(COC(=O)CCCCCCC\C=C/C\C=C/CCCCC)OC(=O)CCCCCCC\C=C/CCCCCCCC	900.80573:6295096 901.80908:5358344 902.81244:2053860	71.04925:6400 71.08568:28481 79.05453:102118 81.07019:435766 83.08582:230549 85.06499:16692 85.10136:22331 91.05439:32274 93.07023:138342 95.04908:4943 95.08591:422918 97.06515:24506 97.10162:185311 99.08068:8542 105.07012:21379 107.08589:93601 109.09342:7738 109.10167:224037 111.08065:28357 111.11735:72096 113.09567:5114 119.086:17932 121.10171:207562 123.11724:98928 125.09664:8849 125.13294:959…	28493	18047	0	0	8613	0	7566	265944160	334878	21018	136343	0	10607	8757466	116793	8125	0	7739	59878	37939	5142619	6744608	7815482	8531696
TG 54:5|TG 18:1_18:2_18:2	lvl 2A	10.276	903.745	MS & library MS/MS match	[M+Na]+	CSH+	Food Cluster 7	Triacylglycerols	VVEBTVMJPTZDHO-WECKWCTPNA-N	CCCCCCCC\C=C/CCCCCCCC(=O)OCC(COC(=O)CCCCCCC\C=C/C\C=C/CCCCC)OC(=O)CCCCCCC\C=C/C\C=C/CCCCC	903.74542:2473206 904.74877:1575983 905.75213:416461	76.83828:4336 79.05446:22710 81.07021:59368 81.10673:4656 83.08582:27806 88.35754:4626 90.97727:4948 91.0545:7044 93.07008:25192 95.08582:59995 97.10117:13499 107.08585:16192 109.1017:33051 121.10154:22780 123.11712:8379 133.10167:5191 135.11748:17531 137.13351:4574 149.13266:5747 163.14935:5952 201.60231:5068 218.79945:4359 247.24184:4434 263.23932:16500 265.25351:8021 303.23026:4911 566.54877:3…	28935	18974	0	19465	54520	14389	11120	10236230	202425	15239	42277	7125	17841	3280726	49917	7328	6527	0	156587	87012	1533684	2229175	2473206	2812888
TG 56:1|TG 16:0_22:0_18:1	lvl 2A	11.947	934.884	MS & library MS/MS match	[M+NH4]+	CSH+	Food Cluster 7	Triacylglycerols	IFLOLSWWIHPMFV-ZXPTYKNPNA-N	CCCCCCCCCCCCCCCCCCCCCC(=O)OCC(COC(=O)CCCCCCCCCCCCCCC)OC(=O)CCCCCCC\C=C/CCCCCCCC	934.88409:8232020 935.88744:6737590 936.8908:2259706	71.08584:256258 71.09026:9638 76.04738:4835 79.05456:32689 81.07017:302520 83.08585:235656 85.06541:8268 85.10143:207341 93.07026:49954 95.08591:388662 97.06536:7650 97.10155:201320 99.08076:7238 99.11735:8997 107.08582:32026 109.10156:226648 111.08095:7598 111.1172:96225 113.13294:7998 121.10168:98858 123.11732:114961 125.13329:27709 135.11748:83306 137.13307:46534 149.13341:36171 149.14565:4985…	0	0	0	0	0	0	10248	1270399	0	0	0	0	0	35593	0	0	7627	0	8365	27287	20703	42977	87582	102817
1-Hexadecylamine	lvl 2A	2.021	242.285	MS & library MS/MS match	[M+H]+	HILIC+	Food Cluster 8	Amines	FJLUATLTXUNBOT-UHFFFAOYSA-N	CCCCCCCCCCCCCCCCN	242.28458:485743 243.28793:131444 244.29129:0	57.07013:11738 71.08565:4220 85.10115:3010 144.23618:1913 199.70334:4550 207.13733:2488 236.88399:2159 242.28464:555353	197274	74474	75377	166064	22134	133724	162996	210447	1412334	312660	74474	134164	139847	2642650	111907	49046	32480	326966	80075	344216	668515	697027	485743	502608
1-Octadecylamine	lvl 2A	1.956	270.316	MS & library MS/MS match	[M+H]+	HILIC+	Food Cluster 8	Amines	REYJJPSVUYRZGE-UHFFFAOYSA-N	CCCCCCCCCCCCCCCCCCN	270.31613:2096310 271.31948:555096 272.32284:0	55.40011:2411 57.07032:35994 64.00013:2793 71.0858:20739 73.5967:2525 85.10126:12333 131.72725:2670 184.11375:2722 198.09634:4019 211.10823:9664 212.1116:42448 270.11493:34772 270.3161:2460798	58937	0	0	0	0	4196	0	13743	72062	4793	0	0	0	76715	0	0	0	7306	0	0	2117134	2238021	2096310	2316267
4-Hydroxynonenal	lvl 2A	1.067	153.091	MS & library MS/MS match	[M+H]+	HILIC+	Food Cluster 8	Fatty alcohols	JVJFIQYAHPMBBX-FNORWQNLSA-N	CCCCCC(C=CC=O)O	153.09137:2547606 154.09472:362226 155.09808:1925588	55.01824:44208 55.05461:45695 57.03386:44623 59.03684:9218 59.04926:3710 64.90805:2271 67.05446:47792 69.0336:10616 69.07014:22557 71.01299:6108 71.0492:17324 77.31878:2686 79.05438:289013 81.03374:21519 81.07007:97487 81.07555:2751 83.04937:14977 83.08565:31459 85.0287:9411 85.06486:4703 91.05437:50949 93.07011:252271 94.07352:11563 95.04932:27728 95.08578:20072 97.06491:30123 97.10126:38632 101…	232867	154944	231690	136652	204310	410508	301752	258137	162486	1112840	186117	269817	223430	244556	225637	121792	121953	438362	175633	2547606	530927	250920	184209	198182
6-Aminopyridine-3-carboxamide	lvl 2A	1.881	121.04	MS & library MS/MS match	[M+H-NH3]+	HILIC+	Food Cluster 8	Pyridinecarboxylic acids and derivatives	ZLWYEPMDOUQDBW-UHFFFAOYSA-N	C1=CC(=NC=C1C(=O)N)N	121.03985:1424347 122.0432:88783 123.04656:155029	53.67605:1776 55.26533:1877 62.76868:2739 66.03394:8227 67.51936:2074 79.05443:1938 86.97289:2181 93.04495:161277 105.62222:2100 106.06553:2903 111.05466:2156 118.89551:1967 120.08081:4091 121.03986:369682 121.089:54058	3444053	1029129	484825	272366	1676916	355087	431978	1667051	461463	427049	384524	525756	396972	342644	3493632	595468	230698	3491382	528224	762171	1731871	1525295	1393126	1486398
Aspartic acid	lvl 2A	9.672	132.029	MS & library MS/MS match	[M-H]-	HILIC-	Food Cluster 8	Amino acids, peptides, and analogues	CKLJMWTZIZZHCS-REOHCLBHSA-N	C([C@@H](C(=O)O)N)C(=O)O	132.02861:4246686 133.03196:176649 134.03532:315462	71.01227:34408 72.0075:4767 88.03878:249158 89.12367:2997 110.49242:2795 114.01849:5377 115.00213:51234 132.02852:58753	282679	176307	249902	219356	208740	124584	277150	276797	231085	333710	157011	318289	197490	82203	194369	270786	3556003	389623	181441	744183	726149	883050	1028870	1091818
Blood Group A Trisaccharide	lvl 2A	9.217	564.169	MS & library MS/MS match	[M+Cl]-	HILIC-	Food Cluster 8	Carbohydrates and carbohydrate conjugates	HUMHYXGDUOGHTG-HEZXSMHISA-N	C[C@H]1[C@H]([C@H]([C@@H]([C@@H](O1)O[C@@H]2[C@H]([C@H]([C@H](OC2O)CO)O)O[C@@H]3[C@@H]([C@H]([C@H]([C@H](O3)CO)O)O)NC(=O)C)O)O)O	564.16888:230081 565.17223:56643 566.17559:75250	52.64981:2398 59.01229:61187 71.01228:22614 89.02288:44366 97.36529:2343 100.03892:22618 101.02278:32425 103.03871:4777 119.03327:24123 127.03817:3167 129.36732:2945 145.04854:12640 160.06056:2972 163.05965:38544 201.75229:5358 216.47632:3051 247.08124:50825 252.80174:2685 423.54373:2870	613	4309	0	727	0	0	0	0	0	1706	0	0	0	0	0	2625	0	9156	130305	230081	1487	1087	0	780
Cyclo(Leu-Pro)	lvl 2A	1.359	211.145	MS & library MS/MS match	[M+H]+	HILIC+	Food Cluster 8	Amino acids, peptides, and analogues	SZJNCZMRZAUNQT-IUCAKERBSA-N	CC(C)C[C@H]1C(=O)N2CCC[C@H]2C(=O)N1	211.14471:2403259 212.14806:398020 213.15142:28878	50.04704:1940 54.18639:2600 60.02433:2106 60.45847:2227 69.07008:3098 70.06528:590191 71.04963:4475 71.06868:4946 72.04456:5289 72.08091:9659 81.07022:8398 84.04461:11850 86.09655:120071 89.57346:2515 93.07005:4470 95.04919:3708 95.08556:5703 98.0602:26756 105.16305:3074 107.05032:2825 109.06552:4067 109.1015:4861 111.0444:3872 114.09148:70245 116.74446:2726 118.35421:2322 123.04449:10299 123.081…	257213	174509	89042	84606	108938	100509	89710	171613	88431	97480	111747	102020	140874	81912	110102	125872	124366	140131	102950	123989	106898	101583	125233	104110
Dexpanthenol	lvl 2A	1.931	206.139	MS & library MS/MS match	[M+H]+	HILIC+	Food Cluster 8	Fatty amides	SNPLKNRPJHDVJA-UHFFFAOYSA-N	CC(C)(CO)C(C(=O)NCCCO)O	206.13916:256507 207.14251:0 208.14587:0	53.68512:1870 57.06994:1870 58.06549:9834 59.65916:2091 61.24565:1963 61.67922:1818 68.4352:1688 69.07031:2564 74.02362:4379 75.25704:2039 76.07587:87968 76.08089:3024 83.11492:1779 85.06532:2159 91.35587:1974 93.23353:2279 95.04964:2508 102.05523:24454 103.0756:4154 109.20915:2061 113.0675:1910 170.118:15003 188.12866:29480 206.13881:71582	23133	27375	18641	7149	91772	16455	61009	140113	52464	7956	10333	27791	20996	19661	212690	109032	7288	220022	44211	62711	66177	78348	59020	51973
Ala-Leu-Lys	lvl 2A	8.989	331.235	MS & library MS/MS match	[M+H]+	HILIC+	Food Cluster 9	Amino acids, peptides, and analogues	AWZKCUCQJNTBAD-UHFFFAOYSA-N	CC(C)CC(C(=O)NC(CCCCN)C(=O)O)NC(=O)C(C)N	331.23477:6598558 332.23812:1303224 333.24148:64558	59.76204:3955 70.06532:53011 73.73524:4206 76.42716:4462 78.19505:4331 84.08096:498309 86.09658:1013189 96.98383:4391 101.10756:47369 129.10252:611047 130.08656:861121 147.11313:1640462 148.43605:5097 157.13393:1196586 185.12891:254628 189.31635:4505 191.72112:5254 212.10217:7211 217.11913:29256 218.15012:4585 242.18596:43497 243.17284:5307 255.09785:31928 260.19766:281152 270.17947:5303 296.1991…	57105	156064	270957	40896	1219846	6619	39172	113474	19340	36255	24989	141379	184884	26088	113090	107932	63249	104047	0	0	293136	324585	329087	327374
cis-4-Hydroxycyclohexanecarboxylic acid	lvl 2A	1.424	127.076	MS & library MS/MS match	[M+H-H2O]+	HILIC+	Food Cluster 9	Alcohols and polyols	HCFRWBBJISAZNK-OLQVQODUSA-N	O=C(O)[C@@H]1CC[C@H](O)CC1	127.07567:1017250 128.07902:94664 129.08238:0	53.95382:1955 57.03388:2295 69.81937:1959 71.0493:9773 79.05441:14949 81.07001:69124 81.07504:3944 85.06498:4353 99.08061:8960 109.06504:31698 125.05991:2911 127.07562:442324	56067	7760	25052	32342	15511	19612	6774	1017250	28131	47646	47802	205247	182792	79013	32800	33784	6562	17983	5561	0	101508	80286	95328	114275
Ornithine	lvl 2A	9.721	133.097	MS & library MS/MS match	[M+H]+	HILIC+	Food Cluster 9	Amino acids, peptides, and analogues	AHLPHDHHMVZTML-BYPYZUCNSA-N	C(C[C@@H](C(=O)O)N)CN	133.09752:1034151 134.10087:113072 135.10423:8555390	64.10455:2078 70.06537:44347 76.17924:1889 108.0291:2146 115.0869:2428 116.07097:19356	511429	555301	531343	157098	186355	45414	114590	190379	38197	42215	116786	766929	473890	166150	514805	142054	304241	514854	73945	271892	337827	346011	347180	354752
Trigonelline	lvl 2A	7.544	138.055	MS & library MS/MS match	[M+H]+	HILIC+	Food Cluster 9		WWNNZCOKKKDOPX-UHFFFAOYSA-N	C[N+]1=CC=CC(=C1)C(=O)[O-]	138.05522:1573079040 139.05857:147353072 140.06193:11884115	56.64268:1034470 56.96001:1052317 57.98932:1143794 66.92735:1132766 67.0546:1255258 92.04962:5876669 93.05747:1277871 94.06534:38504128 96.04495:3913424 110.06033:33090112 138.05534:648074304	297542208	182019616	72499352	79595496	42063320	11262676	8860564	831065664	40034720	52440748	140255856	497632416	438203616	153675216	58553888	29679136	44850532	12530481	5487772	9282812	161653440	162017520	161699264	164801040
1-Palmitoyl-2-hydroxy-sn-glycero-3-phosphoethanolamine	lvl 2A	5.874	454.294	MS & library MS/MS match	[M+H]+	HILIC+	Mixed Cluster 1	Glycerophosphoethanolamines	YVYMBNSKXOXSKW-HXUWFJFHSA-N	CCCCCCCCCCCCCCCC(=O)OC[C@H](COP(=O)(O)OCCN)O	454.2937:1335010 455.29705:420608 456.30041:77858	57.03376:3590 57.07023:38453 62.05676:3820 62.06034:99388 69.07007:3942 71.08573:34233 81.06987:13687 83.08578:5647 85.1013:19135 90.92219:2771 95.08559:16606 97.10148:2736 98.98431:3254 109.10114:6197 124.01622:4508 142.02666:3708 144.92471:2525 155.0107:19532 196.56108:2518 198.05295:4622 216.06367:11873 239.23724:10419 242.01283:2770 282.27963:43815 313.27438:509058 393.23978:26926 395.75058:2…	0	0	4130570	2106064	1956451	856299	1335010	2325959	408372	1224502	838170	1879374	1561337	502169	296688	257202	717734	108821	121033	184916	944850	895183	948536	963048
alpha-L-Asp-L-Lys	lvl 2A	9.999	262.141	MS & library MS/MS match	[M+H]+	HILIC+	Mixed Cluster 1	Amino acids, peptides, and analogues	OAMLVOVXNKILLQ-BQBZGAKWSA-N	C(CCN)C[C@@H](C(=O)O)NC(=O)[C@H](CC(=O)O)N	262.14056:1991223 263.14391:250745 264.14727:24295	56.04976:2875 57.4814:2219 60.04436:3771 60.05568:14058 63.9436:2185 70.02863:3928 70.06534:35547 72.98505:2260 84.08101:229718 85.08392:3676 85.2032:2089 88.03961:39021 101.10763:31475 112.08665:9146 115.08588:11544 116.07018:3490 125.99055:2377 129.10255:198426 130.06046:8914 130.08658:134179 130.1044:14162 139.086:3774 147.11322:157612 157.09688:16955 158.09163:14422 175.12001:26184 184.1071:1…	129704	175764	473886	315536	258362	228099	455655	471617	111211	110761	149267	1045857	862841	218077	274916	194778	1991223	264091	81117	228650	374255	417370	383085	418499
Gln-Glu-Lys	lvl 2A	10.004	404.215	MS & library MS/MS match	[M+H]+	HILIC+	Mixed Cluster 1	Amino acids, peptides, and analogues	MAGNEQBFSBREJL-UHFFFAOYSA-N	C(CCN)CC(C(=O)O)NC(=O)C(CCC(=O)O)NC(=O)C(CCC(=O)N)N	404.21497:648497 405.21832:119887 406.22168:0	51.22665:2105 56.74587:2383 72.29501:2150 83.06059:5804 84.04465:32699 84.08103:59449 101.07137:5433 101.10782:4060 102.05527:12169 108.61347:2592 116.83167:2550 122.40394:2393 129.06616:24893 129.1026:60802 130.08675:38764 147.07597:2652 147.1131:50028 167.08153:10426 195.07684:12697 200.12114:4157 203.74316:2506 212.10374:50835 213.08804:9444 230.11388:5432 239.15193:3596 240.09836:40985 240.13…	0	0	5900	11974	172040	9582	5708	0	0	0	0	11284	6363	0	0	0	61240	0	0	0	11847	9740	6380	9659
Glu-Lys	lvl 2A	9.917	274.14	MS & library MS/MS match	[M-H]-	HILIC-	Mixed Cluster 1	Amino acids, peptides, and analogues	BBBXWRGITSUJPB-YUMQZZPRSA-N	C(CCN)C[C@@H](C(=O)O)NC(=O)[C@H](CCC(=O)O)N	274.14008:227496 275.14343:31426 276.14679:0	58.86943:1866 109.47638:2329 128.03389:10605 142.78618:2146 145.09662:68105 176.84525:2048 177.90117:3662 186.15971:4033 212.14014:16689 230.14879:4247 256.12955:34951 274.13995:23873	6282	19818	257764	148463	116463	91048	140453	142782	136723	85948	79962	86023	111447	73506	94441	108051	226490	101634	69021	151119	101748	144472	153696	153499
glycerophosphocholine	lvl 2A	8.71	258.111	MS & library MS/MS match	[M]+	HILIC+	Mixed Cluster 1	Glycerophosphocholines	SUHOQUVVVLNYQR-MRVPVSSYSA-O	C[N+](C)(C)CCOP(=O)([O-])OC[C@@H](CO)[OH2+]	258.11069:203093776 259.11404:22978266 260.1174:3055144	56.30656:118833 58.06609:174706 60.08106:1548945 65.74146:110406 73.3392:116172 86.09652:4051157 98.98451:116107 103.81625:133602 104.10715:75683688 125.00014:6685749 165.7773:158826 184.0737:5986412 184.09212:207340 198.13341:578644 199.03706:452956 226.24353:132057 240.10005:154342 258.11069:22691666	2150596	6796501	1164165120	250779632	132150376	38837440	62415164	70222896	11877223	50160556	42353052	196468656	138402560	32712734	9752688	17359372	317958368	173564944	4296731	13040370	171467744	176951072	176071744	183323056
Hexanoyl-L-carnitine	lvl 2A	5.17	260.186	MS & library MS/MS match	[M+H]+	HILIC+	Mixed Cluster 1	Fatty acid esters	VVPRQWTYSNDTEA-LLVKDONJSA-N	CCCCCC(=O)O[C@H](CC(=O)[O-])C[N+](C)(C)C	260.18628:1051615 261.18963:199903 262.19299:0	51.48508:2378 58.40686:1993 60.08107:59635 60.0842:3241 66.25928:2102 71.08568:4831 74.11542:2535 83.28514:2140 85.02857:553811 90.74549:1997 99.08094:30231 107.03423:2162 144.10229:12866 201.11259:99148 212.43457:2517 260.1864:384256	29798	42863	1051615	203018	153700	36819	36823	324342	27142	14286	37769	333994	226191	140402	91186	97129	446853	272608	19914	42596	165315	183988	176584	188445
Ile-Lys	lvl 2A	9.19	258.181	MS & library MS/MS match	[M-H]-	HILIC-	Mixed Cluster 1	Amino acids, peptides, and analogues	UWBDLNOCIDGPQE-GUBZILKMSA-N	CC[C@H](C)[C@@H](C(=O)N[C@@H](CCCCN)C(=O)O)N	258.18134:493620 259.18469:63093 260.18805:0	80.4347:2126 91.31752:2033 126.37608:2100 129.10214:8906 145.09674:57153 214.19127:67179 258.18127:182375	440	22208	189101	150054	157407	157033	542340	149406	64709	87472	77434	92777	99233	89897	74144	102437	384058	135563	58035	173082	142181	177451	179967	180265
Leu-Arg	lvl 2A	8.943	288.204	MS & library MS/MS match	[M+H]+	HILIC+	Mixed Cluster 1	Amino acids, peptides, and analogues	SENJXOPIZNYLHU-IUCAKERBSA-N	CC(C)C[C@@H](C(=O)N[C@@H](CCCN=C(N)N)C(=O)O)N	288.2038:29671078 289.20715:3555985 290.21051:298943	57.24967:23411 59.30137:19942 60.05595:797472 68.83607:24408 70.06532:1169728 70.0697:44225 72.08087:102328 79.1154:21293 84.10751:22394 86.09656:2636292 93.88541:25329 112.08711:369326 113.07107:35963 114.10256:43578 115.08719:324199 116.0708:544116 128.11862:26036 130.09801:163768 131.11794:32955 133.09746:56519 156.11354:1012702 157.1091:249239 158.0929:1057814 175.11938:5560202 183.1487:44849…	67576	794510	1345953	3448147	9975908	3861418	5341016	4252716	1672184	1330056	669011	1256916	1128005	724865	1355263	1067715	1397048	1642114	476296	521226	2789500	2822222	2887173	2946610
Pro-Asn	lvl 2A	8.972	230.114	MS & library MS/MS match	[M+H]+	HILIC+	Mixed Cluster 1	Amino acids, peptides, and analogues	JQOHKCDMINQZRV-WDSKDSINSA-N	C1C[C@H]([NH2+]C1)C(=O)N[C@@H](CC(=O)N)C(=O)[O-]	230.11424:1424312 231.11759:9513119 232.12095:887663	65.35473:2092 70.06533:1080327 70.88121:2341 87.05487:3498 89.50727:2404 107.08401:2306 116.07111:17111 133.06117:96310 171.07655:3136 195.07616:3044 196.06129:9975 212.10448:2512 213.08751:126294 222.75897:2269 230.11429:349148 230.13867:26751	0	0	430618	628225	464144	178894	574243	417618	13476	24364	234624	1187807	751151	134346	73646	90728	5513223	1424312	15023	168791	559092	533188	610003	647871
Pro-Ile-Lys	lvl 2A	8.809	357.251	MS & library MS/MS match	[M+H]+	HILIC+	Mixed Cluster 1	Amino acids, peptides, and analogues	LXLFEIHKWGHJJB-UHFFFAOYSA-N	CCC(C)C(C(=O)NC(CCCCN)C(=O)O)NC(=O)C1CCCN1	357.2504:2094438 358.25375:622522 359.25711:78879	52.38739:2237 64.69551:2912 66.19991:2796 70.06531:499020 84.081:61678 86.09664:64936 95.40841:2500 101.10757:4889 110.07108:4976 111.07475:2741 116.07098:5170 129.10254:131165 130.08652:102365 147.1131:306878 157.0975:3640 166.33023:2523 170.56421:2713 183.1496:511619 211.14465:154497 229.15541:23092 242.18724:20005 260.16824:4905 260.19778:104912 260.22903:3550 270.18292:4310 339.24075:13288 35…	0	0	179738	346097	141874	176881	663094	224913	20787	15773	1467	495768	260641	40679	7564	9016	4421110	2594486	29036	5912	441678	507228	530570	534607
Pro-Thr	lvl 2A	8.363	215.102	MS & library MS/MS match	[M-H]-	HILIC-	Mixed Cluster 1	Amino acids, peptides, and analogues	GVUVRRPYYDHHGK-VQVTYTSYSA-N	C[C@H]([C@@H](C(=O)O)NC(=O)[C@@H]1CCCN1)O	215.10242:2051949 216.10577:251167 217.10913:41118	51.54127:1953 53.2064:1975 58.02821:19112 74.02313:48880 82.54192:2482 99.05485:16774 114.05445:41720 123.05495:5074 125.07039:30067 127.08603:166163 153.06548:63146 153.10199:16416 171.07591:1066553 197.46133:14329 202.55553:2738 215.00859:43405 215.10245:261199	858	225435	1495805	260246	237863	87562	212573	207116	112984	158878	404071	616823	437091	186468	213482	157891	430973	176206	29261	300853	489316	540510	599606	651516
SM 42:2;2O	lvl 2A	6.824	813.688	MS & library MS/MS match	[M+H]+	CSH+	Mixed Cluster 1		CERRQJMSXAXGRO-NFYLBXPENA-N	CCCCCCC\C=C/C\C=C/CCCCCCCCCCCCCCCCCCCCCC(=O)NC(COP([O-])(=O)OCC[N+](C)(C)C)C(O)CCCCC	813.68866:545757 814.69201:261948 815.69537:100604	71.0731:4838 86.09675:43232 86.14037:3368 86.80554:3449 98.98484:3376 104.10714:3554 109.02103:2989 125.00029:30763 184.0741:598493 202.54878:4472 207.12735:3326 228.89008:3430 335.17627:3358 813.67859:5573	0	6400	788137	575901	172609	73181	237758	454912	17912	64237	8014	0	103492	56667	0	0	206307	0	0	0	179142	131887	244524	290538
Thr-Ile-Lys	lvl 2A	9.25	361.246	MS & library MS/MS match	[M+H]+	HILIC+	Mixed Cluster 1	Amino acids, peptides, and analogues	AHOLTQCAVBSUDP-UHFFFAOYSA-N	CCC(C)C(C(=O)NC(CCCCN)C(=O)O)NC(=O)C(C(C)O)N	361.24557:1140151 362.24892:211477 363.25228:0	70.06532:2699 74.06013:14905 81.91537:2382 84.08101:54317 85.0285:2601 86.09672:40686 101.07122:36671 129.10255:71100 130.08667:123762 140.94684:2384 142.12309:17049 143.11813:15735 145.04985:3285 147.1132:254915 151.02341:2219 164.0636:2433 169.1335:3214 173.46222:2528 175.11961:3307 183.81683:2182 187.14465:382561 215.1394:44576 242.18506:2732 260.19751:21163 317.2197:11061 361.2048:13941 361.2…	0	0	93013	74898	283458	320281	1140151	118496	15388	30052	11363	66267	49379	18344	69931	34002	822996	111650	0	5840	159073	170050	178050	157210
Gln-Leu-Arg	lvl 2A	9.313	416.262	MS & library MS/MS match	[M+H]+	HILIC+	Mixed Cluster 2	Amino acids, peptides, and analogues	HWEINOMSWQSJDC-UHFFFAOYSA-N	CC(C)CC(C(=O)NC(CCCN=C(N)N)C(=O)O)NC(=O)C(CCC(=O)N)N	416.26245:645088 417.2658:104182 418.26916:0	59.12239:2538 59.67845:2109 60.05586:9394 69.32986:2399 70.06541:22572 72.03339:2397 75.46047:2307 78.66702:2227 84.04457:10266 86.09657:18733 101.07099:9588 112.08685:15164 115.08637:9946 116.07116:23290 129.06566:17720 130.09726:3237 158.09282:45037 175.11935:79538 196.14528:33507 197.12906:44641 197.88127:2255 211.15631:3848 214.15547:25886 224.14011:13042 225.12543:2314 241.16698:2838 242.150…	6282	86064	438544	15505	352002	143541	110214	94870	24850	20150	4877	0	0	7870	55084	69624	400367	156948	211756	72317	134052	139995	136675	139158
TG 53:4|TG 17:1_18:1_18:2	lvl 2A	10.419	886.79	MS & library MS/MS match	[M+NH4]+	CSH+	Mixed Cluster 2	Triacylglycerols	VESVDAJIPQIOEH-SWVQGCAJNA-N	CCCCCCCC\C=C/CCCCCCCC(=O)OC(COC(=O)CCCCCCC\C=C/CCCCCCC)COC(=O)CCCCCCC\C=C/C\C=C/CCCCC	886.79028:763240 887.79363:413708 888.79699:196289	79.05449:16567 81.07029:56632 83.08586:30933 91.0546:3478 93.07018:18507 95.08578:56211 97.10162:20977 100.62395:3460 107.0859:14330 109.10201:27017 111.11736:5978 121.10181:22147 123.11707:7232 135.11755:21340 149.13336:16920 163.14981:3681 198.06206:18582 201.00969:3978 216.94318:4770 243.71114:3352 245.22653:4118 247.24252:4105 251.23822:15704 263.23734:8506 265.25253:15509 298.90012:3563 325.…	9213	17294	15802	15785	10402	7714	9352	763240	12670	0	12514	16815	10729	64518	20497	7189	18806	12959	10562	7425	52446	46967	89428	84999
TG 48:1|TG 14:0_16:0_18:1	lvl 2A	10.56	822.758	MS & library MS/MS match	[M+NH4]+	CSH+	Mixed Cluster 3	Triacylglycerols	GPXZOHHIWJNYTJ-IZHYLOQSNA-N	CCCCCCCCCCCCCCCC(=O)OC(COC(=O)CCCCCCCCCCCCC)COC(=O)CCCCCCC\C=C/CCCCCCCC	822.75885:927925 823.7622:630671 824.76556:163801	71.08596:27195 81.07015:30529 83.08568:20670 85.10142:20572 93.0702:5235 95.08585:39061 97.10125:19425 105.12737:3396 109.10172:28865 111.08086:5212 121.10143:14472 121.24478:3256 123.1172:15308 127.95985:3142 135.11702:14319 137.13266:11014 202.55093:3916 211.20525:6135 239.23752:6391 265.12738:3486 278.9133:4336 313.27423:15116 521.45508:6678 523.47479:73363 535.47876:5064 537.48639:6613 549.49…	11424	11691	6815	0	15829	7767	12268	619789	8461	8136	8924	13170	8005	6915	8605	17996	7988	6336	7709	208404	138881	232171	241977	294624
TG 50:3|TG 16:0_16:0_18:3	lvl 2A	10.259	851.714	MS & library MS/MS match	[M+Na]+	CSH+	Mixed Cluster 3	Triacylglycerols	WLFXGZDFDKIDIL-FJYSWILXNA-N	CCCCCCCCCCCCCCCC(=O)OCC(COC(=O)CCCCCCC\C=C/C\C=C/C\C=C/CC)OC(=O)CCCCCCCCCCCCCCC	851.71405:4419742 852.7174:2911062 853.72076:682415	71.08573:44001 79.05453:23663 81.07014:51572 83.08595:28164 85.10139:34302 88.31886:3866 91.05465:7449 92.6516:3405 93.07014:28690 95.08602:60249 97.10161:17460 105.07043:7345 107.08607:16988 109.1018:43608 111.11732:4604 119.08617:4533 121.10184:20653 123.11716:19626 125.13361:5404 131.08647:5611 133.10225:4762 135.11737:8227 137.13335:4817 145.10118:4034 195.1803:3504 212.4315:3857 214.22191:39…	0	0	0	0	8678	0	6290	265831	0	0	6730	0	0	15519	0	6872	0	0	0	62579	33162	89930	68640	80637
TG 54:5|TG 18:0_18:2_18:3	lvl 2A	10.347	903.745	MS & library MS/MS match	[M+Na]+	CSH+	Mixed Cluster 3	Triacylglycerols	CFIAQJQGPHURGU-VINAAXOKNA-N	CCCCCCCCCCCCCCCCCC(=O)OCC(COC(=O)CCCCCCC\C=C/C\C=C/C\C=C/CC)OC(=O)CCCCCCC\C=C/C\C=C/CCCCC	903.74524:16241184 904.74859:10691493 905.75195:3287820	71.08598:81907 71.38065:12922 79.05463:109357 81.07018:300646 83.08585:114152 83.09073:17385 83.75977:10885 85.06499:14803 85.09622:13762 85.10144:68879 89.54321:9849 91.05464:46701 93.01586:12210 93.07011:139149 95.0493:13530 95.08582:295653 97.10166:87533 105.0704:48882 107.08601:85316 109.10179:172171 111.08106:15486 119.0861:28157 121.10181:147727 123.1174:68696 131.08623:15358 133.10182:6160…	16490	0	0	0	47569	0	6519	4677756	24824	0	42277	7125	17841	649246	0	7328	0	0	0	10777	279771	473352	621909	799175
TG 54:6|TG 18:1_18:2_18:3	lvl 2A	9.894	901.729	MS & library MS/MS match	[M+Na]+	CSH+	Mixed Cluster 3	Triacylglycerols	OTUIORVXGJUHBH-QSVDUOTDNA-N	CCCCCCCC\C=C/CCCCCCCC(=O)OCC(COC(=O)CCCCCCC\C=C/C\C=C/C\C=C/CC)OC(=O)CCCCCCC\C=C/C\C=C/CCCCC	901.72998:557041 902.73333:324042 903.73669:119656	81.07019:6944 90.97696:3481 95.08562:5836 107.08633:4523 123.01421:3350 184.32979:3683 224.64691:4150 576.33807:3722 599.50604:7360 619.4729:7739 621.49158:17585 623.5014:12572 901.73022:288367	17843	0	0	0	131303	0	13768	4337130	18617	0	12779	0	0	775152	0	7393	0	0	70554	67812	345077	399883	510485	557041
DG 28:0	lvl 2A	5.607	535.436	MS & library MS/MS match	[M+Na]+	CSH+	Mixed Cluster 4	Diacylglycerols	PJUNQVMAGODCEI-UHFFFAOYNA-N	CCCCCCCCCCCCCCCCCCCC(=O)OC(CO)COC(=O)CCCCCCC	535.43555:3640018 536.4389:1271073 537.44226:253112	88.11246:4027 88.23318:2413 98.09153:2687 150.32629:3275 285.24283:16157 307.22452:3547 535.43549:635915	6474	6969	7624	0	0	0	0	12119	0	0	0	0	0	0	0	0	0	0	0	141206	99296	143789	83074	65788
3-Cyclohexyl-1,1-dimethylurea	lvl 2A	1.152	171.15	MS & library MS/MS match	[M+H]+	HILIC+	Mixed Cluster 5	Ureas	PZWXYRDNQYUIIU-UHFFFAOYSA-N	CN(C)C(=O)NC1CCCCC1	171.1494:865299 172.15275:110571 173.15611:0	55.05447:8550 61.97413:1706 72.04449:79980 74.38806:1912 75.13661:2136 76.63681:2700 83.08574:18591 89.07102:150779 104.39793:1957 115.05465:3467 115.27166:2069 143.04903:11227 147.94502:4439 171.10126:23801 171.1494:244408	431559	547002	568146	408234	613340	770688	1403616	373325	587600	1512326	465851	508046	958113	404495	1018899	842083	880811	408600	1092495	2613393	753098	759266	806862	806353
12,13-Dihydroxy-9Z-octadecenoic acid	lvl 2A	1.223	313.237	MS & library MS/MS match	[M-H]-	HILIC-	Peptide Cluster 1	Fatty acids and conjugates	CQSLTKIXAJTQGA-FLIBITNWSA-N	CCCCCC(C(CC=CCCCCCCCC(=O)O)O)O	313.23718:240581 314.24053:63294 315.24389:122032	61.5262:1899 69.25909:2209 75.00694:11111 77.86303:2089 82.29166:2169 86.58488:2061 96.34588:2404 99.07949:10384 129.09039:32792 158.99448:2184 183.13766:63502 183.1557:4492 195.1366:3443 201.35054:3762 233.04428:23342 233.07993:11588 255.23103:3464 277.21759:7169 295.22696:21092 313.03784:7005 313.11987:4021 313.1666:12523 313.23697:167858	24153	16421	78428	149570	26481	33582	29162	52831	54685	30874	159600	130262	264550	96078	112860	33418	12735	25710	41636	82138	70789	93443	104447	112499
Ala-Asn	lvl 2A	9.325	204.099	MS & library MS/MS match	[M+H]+	HILIC+	Peptide Cluster 1	Amino acids, peptides, and analogues	CCUAQNUWXLYFRA-IMJSIDKUSA-N	C[C@@H](C(=O)N[C@@H](CC(=O)N)C(=O)O)N	204.09857:1191281 205.10192:152194 206.10528:0	74.02398:9837 84.04457:7919 87.05549:56632 88.03937:8565 89.07125:2973 114.05475:3634 116.03437:15644 120.64334:2269 133.06113:462288 141.06609:15824 159.07767:7720 169.06102:4878 186.08817:13517 187.07193:160572 204.10037:21463	0	10497	2272106	1837070	145769	180659	568537	1439544	808017	1191281	1279968	4259302	3112498	777049	881869	1166727	267804	151324	132330	305736	782905	1035763	972643	856713
Ala-Gln	lvl 2A	9.171	218.114	MS & library MS/MS match	[M+H]+	HILIC+	Peptide Cluster 1	Amino acids, peptides, and analogues	HJCMDXDYPOUFDY-WHFBIAKZSA-N	C[C@@H](C(=O)N[C@@H](CCC(=O)N)C(=O)O)N	218.11415:4619120 219.1175:673780 220.12086:84277	51.47644:2312 52.13994:2022 53.03913:2395 56.24292:2754 67.83768:2236 70.06536:2837 70.54939:2431 70.75427:2533 84.04462:88376 84.05013:3464 86.93266:2108 88.43102:2195 89.07115:166262 90.05544:3966 95.04948:2336 98.49931:2490 99.85764:2059 101.07117:46836 102.05531:5638 112.70209:2441 129.06639:4033 130.05025:609320 143.99976:3576 145.00148:3388 147.0768:1058085 155.08208:17157 156.06577:2980 16…	0	15149	643425	1513149	450573	236429	561311	1769756	593223	1102599	1252876	8567436	4638173	983425	1592525	1437923	1107661	381917	199309	441506	1169821	1191118	1318993	1214307
Ala-Phe	lvl 2A	7.579	235.108	MS & library MS/MS match	[M-H]-	HILIC-	Peptide Cluster 1	Amino acids, peptides, and analogues	OMNVYXHOSHNURL-WCBMZHEXSA-N	C[C@@H](C(=O)N[C@H](CC1=CC=CC=C1)C(=O)O)N	235.10768:533454 236.11103:108315 237.11439:0	61.8288:1930 66.34235:1932 69.74873:1948 70.02847:1932 87.05475:237648 91.05356:16028 103.64428:2159 137.9859:2081 147.04355:57386 164.0705:22902 177.8477:2160 191.11743:14112 235.1076:207464	1171	9999	289969	533454	98296	50159	130892	414423	292473	322707	307225	455977	607791	193657	334894	278456	80899	61048	117699	117658	131093	243901	245010	280162
Ala-Pro	lvl 2A	8.233	187.108	MS & library MS/MS match	[M+H]+	HILIC+	Peptide Cluster 1	Amino acids, peptides, and analogues	WPWUFUBLGADILS-UHFFFAOYSA-N	CC(C(=O)N1CCCC1C(=O)O)N	187.10828:3688052 188.11163:364523 189.11499:0	64.4564:2067 70.06537:196545 72.08112:10657 88.02216:3107 91.47211:2066 100.32964:2098 101.07143:3781 105.5326:2494 116.07095:1792178 119.976:3833 127.90011:2582 130.71407:2313 141.10297:12263 159.11356:9517 187.10841:305629	0	0	4937490	1105780	57367	89641	724362	772849	353115	630526	674340	6537761	3696347	716415	1372975	1194252	678497	317640	36437	291113	1131582	1208080	1190332	1305735
Ala-Pro-Lys	lvl 2A	9.655	315.203	MS & library MS/MS match	[M+H]+	HILIC+	Peptide Cluster 1	Amino acids, peptides, and analogues	BTRULDJUUVGRNE-UHFFFAOYSA-N	CC(C(=O)N1CCCC1C(=O)NC(CCCCN)C(=O)O)N	315.20349:1355786 316.20684:340883 317.2102:116935	56.30328:2149 67.82569:2242 70.06534:165920 70.06971:5339 84.08102:66832 90.4502:2234 101.10751:18210 105.38945:2339 111.17287:1994 116.07164:2452 120.12265:2843 129.10257:65972 130.08672:59948 131.96675:2185 135.08492:2143 141.10258:124249 147.1132:138823 169.09755:92207 187.10774:11068 209.12785:4950 218.54202:2804 226.15535:56012 227.14069:4024 244.16624:221565 279.18204:3973 297.19315:18606 3…	0	25735	286587	299204	98724	100163	229582	287802	151083	216991	229424	920923	742497	390029	127810	329260	1355786	165156	90709	149335	227437	268950	227589	225363
Ala-Thr	lvl 2A	8.807	191.103	MS & library MS/MS match	[M+H]+	HILIC+	Peptide Cluster 1	Amino acids, peptides, and analogues	BUQICHWNXBIBOG-LMVFSUKVSA-N	C[C@H]([C@@H](C(=O)O)NC(=O)[C@H](C)N)O	191.10313:2757777 192.10648:363654 193.10984:0	56.04982:17090 65.13888:2295 72.56782:2365 74.0602:133965 75.96942:1980 83.06068:2995 84.04464:3787 88.03949:2657 90.05509:2291 98.52901:2472 100.0759:17279 102.05523:94619 105.96072:2392 110.02429:2926 120.06583:812655 127.08656:3989 130.0502:120574 135.23878:2719 145.09772:13382 173.09262:107130 179.06978:2244 181.83098:2243 191.03964:3225 191.10297:47671 191.15413:13828	0	50044	1165252	1420980	400385	241464	629774	1361422	537312	941068	861157	2757777	2086099	644253	988465	1039649	753434	366393	499672	695540	832841	880793	868259	896004
Ala-Trp	lvl 2A	7.531	276.135	MS & library MS/MS match	[M+H]+	HILIC+	Peptide Cluster 1	Amino acids, peptides, and analogues	WUGMRIBZSVSJNP-UFBFGSQYSA-N	C[C@@H](C(=O)N[C@@H](CC1=CNC2=CC=CC=C21)C(=O)O)N	276.13498:564482 277.13833:87856 278.14169:0	64.08074:2246 77.25095:1933 79.35725:2021 88.64838:2213 91.85102:2404 93.60227:2215 99.05548:24651 111.73264:2109 130.06535:10952 132.08109:11426 144.08022:4011 146.06029:18496 158.31848:2544 159.09201:9494 187.08693:8725 188.07118:284363 195.3976:2201 205.09785:171329 230.12946:12896 258.12402:4338 276.13583:46820	0	0	235628	430308	7332	41197	119633	391030	227829	444930	410117	1287529	1053814	347603	564482	593884	177502	125548	198825	239840	260188	310198	236993	212758
Ala-Tyr	lvl 2A	7.998	251.103	MS & library MS/MS match	[M-H]-	HILIC-	Peptide Cluster 1	Amino acids, peptides, and analogues	ALZVPLKYDKJKQU-OIBJUYFYSA-N	C[C@@H](C(=O)N[C@H](CC1=CC=C(C=C1)O)C(=O)O)N	251.10269:218625 252.10604:41003 253.1094:25693	54.77144:2001 67.36478:2058 87.05478:64998 98.42439:2068 119.04902:13079 145.06027:4243 163.03862:4207 180.06598:10506 202.13507:2487 207.11375:11211 221.09328:2585 251.10254:70811	9519	15929	273766	151512	37535	37383	77919	169006	113436	137010	108509	448514	340724	120174	120212	177968	59307	49091	15610	28938	90023	120905	121678	126483
Arg-Pro	lvl 2A	9.565	272.172	MS & library MS/MS match	[M+H]+	HILIC+	Peptide Cluster 1	Amino acids, peptides, and analogues	LQJAALCCPOTJGB-YUMQZZPRSA-N	C1C[C@H](N(C1)C(=O)[C@H](CCCN=C(N)N)N)C(=O)O	272.17242:3496244 273.17577:539150 274.17913:95034	57.35357:2250 60.05597:95347 61.47892:2268 70.06533:441518 80.81466:3010 98.06005:15138 98.18878:2690 99.89497:2743 100.0758:3566 112.07887:4447 112.08719:96098 115.08708:22203 116.07091:130264 126.71783:2542 130.09795:5788 131.17899:2470 139.47635:2285 140.08197:36766 151.1226:4433 157.10892:70378 158.09288:59999 175.11943:438521 185.1039:5296 194.12941:9851 195.11366:38517 196.0974:2799 202.103…	18205	114583	1234529	1611766	734099	1135946	2387762	3013751	968383	2003730	3645512	20886188	13582009	4086816	4412787	5223316	1574086	780372	117281	879367	3241285	3630045	3496244	3728409
Asn-Ala	lvl 2A	8.993	204.099	MS & library MS/MS match	[M+H]+	HILIC+	Peptide Cluster 1	Amino acids, peptides, and analogues	SJUXYGVRSGTPMC-IMJSIDKUSA-N	C[C@@H](C(=O)O)NC(=O)[C@H](CC(=O)N)N	204.09859:1987834 205.10194:144877 206.1053:0	70.02897:5036 87.05554:183411 87.68156:2143 90.05524:21460 91.60748:2035 98.02374:4000 99.05561:51804 110.52789:2198 113.07098:9182 115.0504:10194 124.03972:349364 127.05075:20506 141.06631:23929 145.06122:173298 145.07454:4705 147.07695:8079 152.03453:3173 158.09297:19284 159.07724:5314 166.63438:2299 169.06142:22400 170.04527:345773 184.70479:3050 186.08731:10610 187.07181:135642 204.05688:2580…	0	249506	6277050	3844110	1613613	715149	2119342	2723515	879856	1329314	1513693	10377217	5222916	1893389	1724485	2827742	4195160	3368574	423798	541409	2269596	2394991	2384420	2722220
Asn-Asn	lvl 2A	9.659	247.104	MS & library MS/MS match	[M+H]+	HILIC+	Peptide Cluster 1	Amino acids, peptides, and analogues	RJUHZPRQRQLCFL-IMJSIDKUSA-N	C([C@@H](C(=O)N[C@@H](CC(=O)N)C(=O)O)N)C(=O)N	247.10455:898607 248.1079:123480 249.11126:0	52.78752:1913 54.22293:2171 61.28228:2029 70.02908:13099 72.2628:2047 87.05559:128356 88.03949:12594 98.02376:3855 114.06616:2422 115.05029:15591 116.03451:4222 124.04012:16287 124.08763:15165 126.01935:2265 133.06116:136722 143.04585:13289 150.01984:2115 151.13319:2181 157.06169:2622 168.02986:16435 170.05611:3835 171.04074:48213 184.07222:11257 185.05618:44310 188.06718:76359 195.04051:21679 19…	0	12602	597805	576822	23686	64209	233700	379591	156074	365266	381162	1217883	780410	273893	269627	454398	125065	74840	14949	161096	320155	388860	350521	344381
Asn-Gly	lvl 2A	9.346	190.083	MS & library MS/MS match	[M+H]+	HILIC+	Peptide Cluster 1	Amino acids, peptides, and analogues	KLKHFFMNGWULBN-UHFFFAOYSA-N	C(C(C(=O)NCC(=O)O)N)C(=O)N	190.08281:1850126 191.08616:205485 192.08952:0	55.3183:2534 59.50443:2305 60.08104:3828 70.02901:9339 76.03936:2485 85.03995:15868 85.08472:2353 87.05555:156607 98.02395:4791 110.02397:327330 113.03464:17437 127.05038:17892 131.04544:106090 131.08997:3002 138.01891:37698 144.07823:2171 144.13815:2365 145.06207:8493 155.04506:3668 156.02957:357613 172.07187:3828 173.05618:116746 190.08276:8938 190.12366:9856 190.14464:50771	5903	31266	1133338	767167	63725	140442	387169	567880	279763	247915	229388	996326	719375	236177	352364	335395	150318	93656	68310	221942	421467	443110	419889	405938
Asn-Ile	lvl 2A	7.88	244.129	MS & library MS/MS match	[M-H]-	HILIC-	Peptide Cluster 1	Amino acids, peptides, and analogues	MQLZLIYPFDIDMZ-HAFWLYHUSA-N	CC[C@H](C)[C@@H](C(=O)O)NC(=O)[C@H](CC(=O)N)N	244.12924:273386 245.13259:20950 246.13595:0	57.04331:1980 58.11034:2708 58.51266:1984 62.56916:1966 72.05755:1865 98.02322:11240 113.034:16377 130.0858:54450 141.10202:11291 183.11206:8426 184.04114:2487 200.13959:2467 227.10292:11114 244.12917:30151	989	4296	183517	198100	105710	20247	75631	209886	103985	123314	132033	273386	246300	101937	103717	172734	65428	57461	11528	39132	89423	119329	130299	134338
Asn-Met	lvl 2A	8.256	262.086	MS & library MS/MS match	[M-H]-	HILIC-	Peptide Cluster 1	Amino acids, peptides, and analogues	IQTUDDBANZYMAR-WDSKDSINSA-N	CSCC[C@@H](C(=O)O)NC(=O)[C@H](CC(=O)N)N	262.08578:308687 263.08913:40774 264.09249:6587	53.74661:1957 81.78177:2357 96.25561:1810 98.02328:14429 109.9371:2111 113.03414:15945 148.04214:49175 159.0582:24579 170.09158:2721 183.05818:2684 201.06943:4720 228.03226:3064 245.05931:32879 254.41035:2182 262.08554:36816	0	3093	301907	257979	32318	16517	57820	158061	112852	178232	75581	231794	158935	32273	67360	86235	135110	55449	3539	20489	75646	99394	112273	129422
Asn-Pro	lvl 2A	8.788	230.114	MS & library MS/MS match	[M+H]+	HILIC+	Peptide Cluster 1	Amino acids, peptides, and analogues	GADKFYNESXNRLC-WDSKDSINSA-N	C1C[C@H](N(C1)C(=O)[C@H](CC(=O)N)N)C(=O)O	230.11409:3619311 231.11744:12659648 232.1208:1316337	62.21688:2724 70.06527:80588 87.05547:104121 116.07082:313845 125.0712:58484 127.08661:3265 153.06627:18191 159.11307:6292 160.68295:2792 167.08177:15754 171.07675:414938 184.10844:14103 195.07684:362033 196.06087:910777 200.62125:3874 212.10332:59189 213.08742:371157 228.34837:2791 230.11398:67970 230.14055:31325 230.18604:10146 230.24796:4278	0	0	412944	904901	97164	196837	1183523	548113	113099	311325	570117	6756864	4285000	772791	967691	1145860	757372	363142	33751	299022	1151282	1248816	1284056	1304806
Asn-Pro-Lys	lvl 2A	9.797	358.209	MS & library MS/MS match	[M+H]+	HILIC+	Peptide Cluster 1	Amino acids, peptides, and analogues	AWXDRZJQCVHCIT-UHFFFAOYSA-N	C1CC(N(C1)C(=O)C(CC(=O)N)N)C(=O)NC(CCCCN)C(=O)O	358.2095:3607144 359.21285:637398 360.21621:54804	70.02887:5776 70.06537:441216 74.05985:3027 84.08104:172651 87.05565:28776 99.09171:3796 101.10768:44917 110.07156:59411 116.07082:4642 122.07162:11001 125.07103:5811 129.1026:159517 130.08669:170050 138.06638:4266 139.08702:4582 142.08641:10707 145.88332:2622 147.11322:374825 150.06619:4120 153.10284:3631 166.06166:23173 166.09727:4540 167.07927:26819 167.0963:24487 168.06635:4943 169.57718:3186…	0	0	3017756	798661	42559	6704	121074	1094939	381013	720510	837267	4890663	3607144	846573	522673	876729	774336	282392	0	18652	528228	682052	679768	735808
Asn-Ser	lvl 2A	9.555	220.093	MS & library MS/MS match	[M+H]+	HILIC+	Peptide Cluster 1	Amino acids, peptides, and analogues	SONUFGRSSMFHFN-IMJSIDKUSA-N	C([C@@H](C(=O)N[C@@H](CO)C(=O)O)N)C(=O)N	220.09344:1087207 221.09679:109357 222.10015:0	50.37181:1803 57.84587:2056 60.04473:12599 61.48002:1892 70.02901:16719 70.06521:4505 87.05553:200342 88.03954:35712 95.04912:2994 96.05211:2702 98.02375:3691 106.05008:47399 110.30499:2197 112.03978:2803 115.05022:12865 116.03448:41770 122.02391:2783 124.41998:2146 129.06572:8746 133.06062:3485 138.13901:2606 140.03462:161073 141.00052:8475 142.00403:3081 143.04578:31453 145.06129:4595 157.06119…	0	109809	2413859	1181176	183636	289643	1087207	1109432	612322	800073	649614	2957206	1707084	715943	744965	1170822	501762	259669	89398	264268	693013	787427	719107	784526
Asn-Thr	lvl 2A	9.293	234.109	MS & library MS/MS match	[M+H]+	HILIC+	Peptide Cluster 1	Amino acids, peptides, and analogues	VBKIFHUVGLOJKT-IWGUZYHVSA-N	C[C@H]([C@@H](C(=O)O)NC(=O)[C@H](CC(=O)N)N)O	234.10915:2310968 235.1125:387919 236.11586:24868	53.47316:2137 56.04998:9824 57.03392:2296 59.75015:2027 70.02905:22307 74.06018:33030 84.04467:12491 87.05553:260091 88.0211:2681 88.0394:21118 98.02375:3627 101.07121:13937 101.32779:2023 102.05519:45713 106.05019:2504 110.02419:4583 111.0555:2674 112.03927:3831 120.06588:122793 122.19673:2340 129.06621:15189 130.05028:216827 133.06125:14941 136.03979:77232 138.0554:8547 143.08212:8987 153.06682…	42911	73470	2310968	1759439	313093	257813	729776	1537231	714210	1070469	842620	4134148	2644102	742537	1028662	1528704	1041121	321603	146049	423999	956135	983962	964930	1038319
Asn-Tyr	lvl 2A	8.476	294.109	MS & library MS/MS match	[M-H]-	HILIC-	Peptide Cluster 1	Amino acids, peptides, and analogues	FYRVDDJMNISIKJ-UWVGGRQHSA-N	C1=CC(=CC=C1C[C@@H](C(=O)O)NC(=O)[C@H](CC(=O)N)N)O	294.10858:284947 295.11193:47993 296.11529:0	53.45894:1940 66.30166:2297 71.0235:8437 74.02325:2315 77.78476:1917 78.27866:2477 93.36343:1927 98.02338:5048 113.034:26791 119.04966:3071 130.06042:3455 134.05974:3902 163.0385:3486 180.0652:73620 191.08115:16531 233.09238:13986 247.67587:2021 250.11705:2641 277.08167:17987 294.10825:40048	10225	35393	168860	134893	37459	21521	81034	198567	120092	142725	104359	148986	149780	115627	122485	187331	58793	60297	35697	52424	90259	109829	112569	134338
Asn-Val	lvl 2A	8.248	232.13	MS & library MS/MS match	[M+H]+	HILIC+	Peptide Cluster 1	Amino acids, peptides, and analogues	KWBQPGIYEZKDEG-FSPLSTOPSA-N	CC(C)[C@@H](C(=O)O)NC(=O)[C@H](CC(=O)N)N	232.12978:11479218 233.13313:1270377 234.13649:139777	55.0549:33626 57.72712:7994 58.0304:9204 59.04971:10242 60.07988:7258 67.94464:7460 69.37228:7804 70.02902:45401 71.45292:7654 72.08098:331634 77.68319:9158 82.06523:13794 82.34574:7931 83.04949:10326 85.03966:10795 87.05553:882829 88.03962:9613 98.02392:90873 98.06017:12676 99.0919:51676 101.05989:31569 110.02409:90944 118.08647:302014 118.52344:7542 124.98528:8159 127.08695:787198 135.35338:856…	1025455	1143461	5568669	7632732	1625691	1312384	2260557	6508872	2874718	4721238	4350924	11479218	6983328	3587410	3031515	5967840	2026016	1686074	1148703	1481331	3044340	3050538	3271680	3505270
Asp-His	lvl 2A	9.998	271.104	MS & library MS/MS match	[M+H]+	HILIC+	Peptide Cluster 1	Amino acids, peptides, and analogues	HSPSXROIMXIJQW-BQBZGAKWSA-N	C1=C(NC=N1)C[C@@H](C(=O)O)NC(=O)[C@H](CC(=O)O)N	271.10428:230369 272.10763:0 273.11099:0	60.25532:1898 88.03948:2131 110.07159:54328 110.94974:1805 110.95963:1770 130.02367:2020 136.08734:3148 145.57295:2291 156.07709:62950 157.08131:2400 166.06218:2730 178.68452:2388 180.07719:4549 195.77026:1977 207.08788:2874 208.07286:2718 225.09955:9892 235.08586:2401 236.06659:2778 250.56097:2230 253.09302:31480 254.07639:3457 271.05533:2398 271.1033:35232	0	0	90549	60154	8970	44388	78760	77885	75195	40733	35493	381415	319678	44417	78388	46228	15022	0	0	17056	66352	60679	74970	70019
Asp-Leu	lvl 2A	8.192	247.13	MS & library MS/MS match	[M+H]+	HILIC+	Peptide Cluster 1	Amino acids, peptides, and analogues	ZVDPYSVOZFINEE-BQBZGAKWSA-N	CC(C)C[C@@H](C(=O)O)NC(=O)[C@H](CC(=O)O)N	247.12968:3537311 248.13303:463258 249.13639:0	50.05962:2309 54.88324:2408 69.07016:30612 70.02892:8935 72.08109:6020 83.06103:2494 84.04464:5977 84.06407:2850 85.03998:11153 85.04784:2538 86.09664:469041 88.03954:338144 98.0241:15242 98.62283:2464 101.07101:2844 106.02964:2712 110.02393:34268 113.10748:15669 115.05024:2945 118.08649:3933 119.08952:3612 124.03995:10117 124.08736:18748 132.10228:534280 138.09227:10418 141.10262:158493 155.1189…	75553	186752	3955006	2368772	333132	234049	798255	1985353	1143076	1590610	1360358	4401596	3072465	886886	976476	1256314	700877	485026	447251	746898	1220234	1162080	1279169	1267069
Asp-Ser	lvl 2A	9.752	221.077	MS & library MS/MS match	[M+H]+	HILIC+	Peptide Cluster 1	Amino acids, peptides, and analogues	DWBZEJHQQIURML-IMJSIDKUSA-N	C([C@@H](C(=O)N[C@@H](CO)C(=O)O)N)C(=O)O	221.07753:808780 222.08088:0 223.08424:0	58.64677:2001 60.04471:37872 64.18318:1988 70.02906:4778 72.08105:15455 74.29255:2089 88.03951:188055 93.37038:2125 95.04908:2970 106.05019:184254 115.05085:3065 116.03448:26475 123.18758:2049 130.05038:3586 131.68861:2016 134.04497:3524 140.03467:56058 143.04526:15692 157.06102:13971 161.05627:33245 168.02887:2361 175.07161:11825 179.7749:2011 185.05621:4690 186.0401:46325 203.0668:48880 203.14:…	0	0	281006	282281	38307	127491	255989	387197	273182	323367	222349	993218	781044	236006	371488	454840	65165	77473	20428	165718	283117	275788	285241	236734
Asp-Val	lvl 2A	8.578	233.114	MS & library MS/MS match	[M+H]+	HILIC+	Peptide Cluster 1	Amino acids, peptides, and analogues	CPMKYMGGYUFOHS-FSPLSTOPSA-N	CC(C)[C@@H](C(=O)O)NC(=O)[C@H](CC(=O)O)N	233.1138:10046932 234.11715:1327480 235.12051:177101	55.05476:43879 70.02901:37197 72.08095:1335517 85.03981:13064 88.03951:1288293 98.02396:37719 99.09193:53832 101.06036:12037 110.02393:62183 118.08649:1815741 127.08689:636037 128.07079:18059 136.22835:7525 141.10254:66644 142.08667:257423 150.76613:9054 152.071:971802 155.08226:66674 159.16098:8076 169.09756:180018 170.08133:146968 173.09256:561257 178.67409:7971 187.1082:1752166 197.09229:36832…	582119	704660	3288732	3245046	637630	600611	1028844	3087890	1619206	2102887	1822191	10046932	6620156	1462166	2234021	2510173	794488	800396	626595	1165264	1771309	1846450	1910756	1899334
Ceramide 34:0;2O|Ceramide 18:0;2O/16:0	lvl 2A	5.953	540.538	MS & library MS/MS match	[M+H]+	CSH+	Peptide Cluster 1	Ceramides	GCGTXOVNNFGTPQ-UHFFFAOYNA-N	CCCCCCCCCCCCCCCC(O)C(CO)NC(=O)CCCCCCCCCCCCCCC	540.53748:2182330 541.54083:722917 542.54419:171894	70.06532:12254 71.08567:6014 81.07018:27123 83.08573:15010 95.08607:31710 97.10145:15826 102.09164:3160 103.61273:2438 109.10161:13711 111.11664:3243 116.13633:2422 123.11734:3984 137.13396:2680 196.57874:21363 200.95302:44523 212.41576:2687 216.51978:2441 240.26958:3279 254.28395:12256 256.26474:105811 266.28546:98002 284.29602:168694 302.30606:24917 336.92755:13866 406.95544:2957 504.51749:2812…	44986	19628	276594	336099	106089	95101	282098	357126	377996	192477	162483	401844	518578	168000	391951	338664	152383	64798	55002	171625	226368	365559	339651	425895
Gln-Ala	lvl 2A	8.887	218.114	MS & library MS/MS match	[M+H]+	HILIC+	Peptide Cluster 1	Amino acids, peptides, and analogues	FAQVCWVVIYYWRR-WHFBIAKZSA-N	C[C@@H](C(=O)O)NC(=O)[C@H](CCC(=O)N)N	218.11404:12839874 219.11739:1650407 220.12075:170261	51.68526:2548 56.04992:4807 63.05585:3262 68.48605:2239 72.75838:3040 75.97081:2484 83.06052:435178 84.04456:633427 90.05515:969471 95.04956:5623 101.07117:148667 110.06044:6065 110.98404:2788 113.17222:2648 127.08699:5142 129.06566:19644 143.99834:2955 145.00137:2950 154.09785:65808 155.08185:301170 156.06569:50918 161.02617:2988 162.02615:5198 173.09218:10851 183.07689:86318 184.06137:5828 200.…	306898	887760	15124229	14158196	5893164	2736057	4839306	12859052	6371024	7116512	6174590	34363624	18147824	8769341	9306653	12102476	11466188	3674954	4388713	4848214	9571230	10160307	10172327	10367429
Gln-Gln	lvl 2A	9.451	275.136	MS & library MS/MS match	[M+H]+	HILIC+	Peptide Cluster 1	Amino acids, peptides, and analogues	LOJYQMFIIJVETK-NTSWFWBYSA-N	C(CC(=O)N)C(C(=O)NC(CCC(=O)N)C(=O)O)N	275.1358:37233696 276.13915:5136538 277.14251:496969	74.09711:15165 83.06059:563723 84.04463:1647336 101.07117:178162 102.05488:16945 113.0205:17325 120.28912:14494 128.08209:103827 129.06619:575260 130.05035:758039 147.07695:365346 167.08194:71266 195.07727:200450 199.28625:26863 211.11958:66816 212.10425:174279 213.08755:182778 213.29391:15850 222.08885:14907 223.07208:399637 240.09842:739171 241.05453:30017 241.0826:1246077 257.12521:2695964 258…	64950	328596	1866818	5864352	1701497	1422524	3283782	9602241	1537363	4274026	15960896	115084976	71678464	14720437	7420822	4002080	7902798	1059368	278719	1228402	17010252	18965424	18171416	16599075
Gln-Gly	lvl 2A	9.233	202.082	MS & library MS/MS match	[M-H]-	HILIC-	Peptide Cluster 1	Amino acids, peptides, and analogues	JEFZIKRIDLHOIF-BYPYZUCNSA-N	C(CC(=O)N)[C@@H](C(=O)NCC(=O)O)N	202.08199:978137 203.08534:92674 204.0887:12006	51.87008:2146 58.02828:17255 70.02824:42206 70.54738:2108 74.02312:231243 76.65777:2069 82.02785:3041 85.03912:19537 87.05471:37422 99.0547:17647 127.04969:25990 140.08128:79061 141.06532:65425 155.43022:2116 158.09174:13345 161.6842:1950 185.05515:26190 201.66609:2675 202.08205:147638	15442	148021	2068853	697735	98385	117504	425474	601771	324379	357920	830092	1678146	1213228	580091	411854	457815	96059	132122	67874	337895	778240	898116	927343	1025828
Gln-Met	lvl 2A	8.208	276.101	MS & library MS/MS match	[M-H]-	HILIC-	Peptide Cluster 1	Amino acids, peptides, and analogues	SIGGQAHUPUBWNF-BQBZGAKWSA-N	CSCCC(C(=O)O)NC(=O)C(CCC(=O)N)N	276.10126:1074483 277.10461:153588 278.10797:83866	56.77281:1910 58.02824:9430 66.85139:2338 69.26149:2168 70.02823:10120 80.89603:2071 95.20393:2050 101.01246:2189 109.03906:2444 113.07063:3278 115.33826:1947 125.03397:2968 127.04994:29992 148.04216:86081 148.21785:2075 157.0601:2832 161.07358:31729 167.08102:13282 173.07391:9774 184.10768:28110 193.63541:2136 194.31557:2303 210.08501:2788 214.10095:25032 215.08475:18499 228.09811:31330 232.1116…	708	15944	431094	457050	41503	23292	58725	418250	252683	272982	235593	493533	371072	83412	162599	233928	180987	73211	10654	48634	190109	231667	260556	291133
Gln-Pro	lvl 2A	8.668	244.13	MS & library MS/MS match	[M+H]+	HILIC+	Peptide Cluster 1	Amino acids, peptides, and analogues	NJMYZEJORPYOTO-BQBZGAKWSA-N	C1C[C@H](N(C1)C(=O)[C@H](CCC(=O)N)N)C(=O)O	244.12994:6633069 245.13329:877096 246.13665:84075	51.7971:4782 54.42127:4967 56.04971:4400 67.33595:4889 70.06535:165797 83.05502:6618 83.06062:230834 84.04467:274245 90.52492:5757 95.41069:4429 96.54197:6391 101.07111:39956 116.07095:766766 129.06639:94486 147.07666:10990 148.89604:5158 164.43105:5634 180.11317:12316 181.09764:128142 182.08226:6903 205.15085:5535 209.09268:132756 226.11929:1406489 227.1033:1114682 244.12833:37786	0	0	249762	1206007	254665	367329	914371	2390091	65702	713215	7581896	113411224	59520916	7278214	1880886	1579487	2006813	627687	8102	276217	6110304	6264478	6281724	7140364
Gln-Ser	lvl 2A	9.441	234.109	MS & library MS/MS match	[M+H]+	HILIC+	Peptide Cluster 1	Amino acids, peptides, and analogues	UKKNTTCNGZLJEX-WHFBIAKZSA-N	C(CC(=O)N)[C@@H](C(=O)N[C@@H](CO)C(=O)O)N	234.1091:7568184 235.11245:1022407 236.11581:143966	50.62838:2392 56.0499:5949 60.0447:62535 74.06026:12731 77.27124:2331 83.06056:272887 84.04461:375548 88.0396:26883 101.07121:150126 106.05014:780691 116.03439:30925 126.05518:46863 129.06606:47095 130.05025:5104 133.06142:19822 153.06549:3877 154.04994:24957 170.09297:15708 171.07669:62848 172.06085:27011 196.59006:13903 196.61194:6136 198.08809:54583 199.07193:149954 200.05594:10322 216.09853:1…	47858	99430	3500023	5212214	2136628	1434020	2942564	3234951	1468694	2919741	3107400	11217037	7927178	2418438	2101085	3372380	11236394	2107210	1704032	984434	2942438	3081002	3035332	2935981
Gln-Tyr	lvl 2A	8.404	310.141	MS & library MS/MS match	[M+H]+	HILIC+	Peptide Cluster 1	Amino acids, peptides, and analogues	KGNSGRRALVIRGR-QWRGUYRKSA-N	C1=CC(=CC=C1C[C@@H](C(=O)O)NC(=O)[C@H](CCC(=O)N)N)O	310.14056:2788235 311.14391:398875 312.14727:44171	50.30416:2645 56.04971:9523 58.86303:2186 81.44701:2491 83.0606:303524 84.04465:212366 101.07119:88933 107.04969:18374 120.00298:2637 120.08102:2821 123.04448:4858 129.06635:18331 136.07611:332265 140.66891:2358 142.04807:3545 147.04396:3446 153.06625:23987 164.02995:25371 165.05513:150044 169.06126:29214 179.78407:2768 182.08176:380745 190.66554:2597 202.08682:37741 203.70316:2666 219.11368:3858…	0	7862	1025783	1150343	136987	256545	710109	1357492	405385	728435	668758	1363174	1022180	650144	1112736	1378887	498439	287389	54803	164419	584136	707218	724859	741537
Gln-Val	lvl 2A	8.204	246.146	MS & library MS/MS match	[M+H]+	HILIC+	Peptide Cluster 1	Amino acids, peptides, and analogues	MRVYVEQPNDSWLH-XPUUQOCRSA-N	CC(C)[C@@H](C(=O)O)NC(=O)[C@H](CCC(=O)N)N	246.14563:7157958 247.14898:991189 248.15234:474220	54.5195:2460 55.05473:3708 56.00159:2432 56.05007:4282 57.67196:2391 69.51263:2163 72.08099:265885 75.69451:2823 82.81401:2534 83.06058:300768 84.04462:294915 86.09659:17277 90.39867:2856 98.46523:2263 101.07121:96598 102.29698:2445 118.08652:363467 129.06607:20328 138.09155:23083 143.11823:11285 155.11885:25957 182.12936:162642 183.11337:804777 184.09703:24786 199.5096:3183 200.13985:15453 211.1…	0	249553	7157958	4103240	389651	393543	1627242	3481096	1402568	2442226	1683238	10854155	5793056	2597094	2262644	4585112	500378	496307	196073	625964	1982854	2105598	2292843	2300554
Glu-Ala	lvl 2A	8.922	219.098	MS & library MS/MS match	[M+H]+	HILIC+	Peptide Cluster 1	Amino acids, peptides, and analogues	JZDHUJAFXGNDSB-WHFBIAKZSA-N	C[C@@H](C(=O)O)NC(=O)[C@H](CCC(=O)O)N	219.09807:5947428 220.10142:607862 221.10478:2870548	53.03897:23215 56.04987:11269 57.6814:2243 70.73828:2670 77.03913:4157 83.06049:38180 84.04459:861544 84.06379:30987 84.08075:3741 85.04787:52559 90.05518:1344684 91.05232:5905 91.0584:52497 95.04932:78164 101.0713:15259 102.05519:204227 102.07469:9906 105.04491:26824 110.06045:5476 119.36577:2613 122.86742:3223 127.08679:15744 130.05051:4821 138.05511:13434 141.00084:120410 148.06105:17908 155.0…	611105	748809	2299516	2117669	775026	441479	1442857	2093484	1203298	1118638	864886	8604098	5947428	970272	1794432	1285266	2584459	429578	390791	1006223	1415472	1522220	1361166	1587192
Glu-Ile	lvl 2A	7.976	261.145	MS & library MS/MS match	[M+H]+	HILIC+	Peptide Cluster 1	Amino acids, peptides, and analogues	SNFUTDLOCQQRQD-ZKWXMUAHSA-N	CC[C@H](C)[C@@H](C(=O)O)NC(=O)[C@H](CCC(=O)O)N	261.14532:3062900 262.14867:473406 263.15203:0	53.80104:3561 56.04986:5089 56.91069:2454 69.07016:16492 72.08064:5483 76.79444:2585 84.04462:271045 86.09662:349272 89.5641:2927 93.95451:2950 102.05521:88401 102.81287:2811 122.20625:3188 129.05551:3937 129.06619:131474 132.10228:308876 139.58408:2458 141.06636:5236 143.03424:59812 148.06131:4598 156.06686:2559 169.13371:12541 174.07706:2891 196.82378:2995 196.8412:19188 197.129:782756 202.0712…	35208	54784	1183327	1162718	131518	126355	386627	1015522	513171	766714	921491	3062900	2014252	621217	671380	1056044	433291	223334	160697	404418	549580	621381	602559	647538
Glu-Leu	lvl 2A	7.925	261.145	MS & library MS/MS match	[M+H]+	HILIC+	Peptide Cluster 1	Amino acids, peptides, and analogues	YBAFDPFAUTYYRW-YUMQZZPRSA-N	CC(C)C[C@@H](C(=O)O)NC(=O)[C@H](CCC(=O)O)N	261.14517:1048517 262.14852:140145 263.15188:0	66.50598:1856 81.04862:2163 84.04457:75360 86.09655:100835 102.05524:25298 121.18037:2205 129.06618:8786 130.46902:2017 132.10217:126889 141.06555:3179 144.12035:2263 156.30127:2066 192.42957:2595 197.12892:145977 199.76514:2297 199.78374:4004 225.12344:10458 243.13449:148305 261.13217:2891	35208	54784	749886	538121	83820	78709	202023	532162	326474	766714	278425	1454061	949639	621217	671380	294251	523177	176110	160697	246771	382414	404247	371114	398795
Glu-Phe	lvl 2A	7.995	295.13	MS & library MS/MS match	[M+H]+	HILIC+	Peptide Cluster 1	Amino acids, peptides, and analogues	XMBSYZWANAQXEV-QWRGUYRKSA-N	C1=CC=C(C=C1)C[C@@H](C(=O)O)NC(=O)[C@H](CCC(=O)O)N	295.12973:903227 296.13308:181479 297.13644:0	59.00304:1984 67.09538:2084 74.36131:2209 84.04464:99228 90.97694:20582 94.97675:1968 99.23343:1978 102.05538:35147 120.08113:240017 122.0894:2235 123.21677:2291 126.45004:2556 148.06067:9022 158.96477:9748 166.08676:229138 186.0928:15136 186.87115:2273 201.64709:2208 231.11362:159421 259.1087:15599 277.1192:149552 295.13022:12647	0	70556	497051	469308	113832	90683	348746	481604	277844	267764	207473	1592830	959851	231254	487155	328117	161907	70410	138948	269090	339003	317403	298707	344984
Glu-Ser	lvl 2A	9.511	235.093	MS & library MS/MS match	[M+H]+	HILIC+	Peptide Cluster 1	Amino acids, peptides, and analogues	UQHGAYSULGRWRG-WHFBIAKZSA-N	C(CC(=O)O)[C@@H](C(=O)N[C@@H](CO)C(=O)O)N	235.09315:1215706 236.0965:135755 237.09986:60863	55.93676:2096 60.04475:42235 60.96908:2101 61.0479:2028 69.63118:2196 70.02909:2460 72.04012:2040 74.06032:3177 84.03886:3645 84.04465:101656 88.03958:16596 102.05527:53131 106.05022:264461 110.0715:3848 116.03474:8908 120.06564:17778 126.055:15610 130.05009:17441 131.05331:2851 144.50301:2401 148.06065:9754 148.07999:3165 154.05017:2708 171.04897:2801 171.07689:27308 199.07213:52055 200.07521:32…	0	102653	1215706	801524	161875	168026	525151	680979	398778	403903	362853	1725742	1216623	331574	503170	474284	1291995	298084	154486	457332	628434	670375	638380	632047
Glu-Thr	lvl 2A	9.244	249.109	MS & library MS/MS match	[M+H]+	HILIC+	Peptide Cluster 1	Amino acids, peptides, and analogues	JSIQVRIXMINMTA-ZDLURKLDSA-N	C[C@H]([C@@H](C(=O)O)NC(=O)[C@H](CCC(=O)O)N)O	249.1088:931841 250.11215:98288 251.11551:0	56.04989:5440 74.06022:41537 84.04461:86310 102.04817:2696 102.05525:69397 120.06583:220583 130.05057:18822 140.07114:27802 148.06055:10618 167.08179:9019 168.06607:3494 169.06113:8972 180.8148:2227 185.09233:36609 201.92906:3090 213.08731:84624 219.47198:2366 231.09808:193441 249.04655:2489 249.10826:4721	0	59984	1644096	1454110	428472	226125	604629	1027853	449160	730911	635876	2438940	1801170	397488	689862	725083	972108	241989	210568	528552	697364	709991	776668	686126
Glu-Val	lvl 2A	8.279	247.13	MS & library MS/MS match	[M+H]+	HILIC+	Peptide Cluster 1	Amino acids, peptides, and analogues	SITLTJHOQZFJGG-XPUUQOCRSA-N	CC(C)[C@@H](C(=O)O)NC(=O)[C@H](CCC(=O)O)N	247.12959:14265759 248.13294:2101306 249.1363:159120	56.45929:11789 63.57557:13972 70.02898:15890 72.08099:844652 84.03895:31598 84.04461:854760 86.09674:115874 88.0395:53551 98.59328:14447 102.05521:306421 118.08652:1244746 132.10199:63306 138.09154:104816 141.10268:19807 155.11816:80905 166.08705:18397 183.11339:2397115 201.12396:124641 211.10844:198762 212.09216:16811 229.11897:1837490 247.0927:29490 247.13016:54625	0	139416	4454871	2756751	305181	387700	1046721	2682827	1425770	1731610	1599598	14265759	7846352	1280224	1859106	2342758	3166086	744415	344004	1022940	1905528	2089752	2150429	2219160
Glu-Val-Lys	lvl 2A	9.536	375.225	MS & library MS/MS match	[M+H]+	HILIC+	Peptide Cluster 1	Amino acids, peptides, and analogues	ZYRXTRTUCAVNBQ-UHFFFAOYSA-N	CC(C)C(C(=O)NC(CCCCN)C(=O)O)NC(=O)C(CCC(=O)O)N	375.22476:514737 376.22811:84287 377.23147:0	50.91876:2334 70.06477:2097 72.08105:23874 84.04459:4197 84.0761:3220 84.08102:64452 86.09653:5173 87.30695:2421 88.35238:2271 92.15131:2412 100.07583:4805 101.10733:3746 102.05486:9306 112.0873:2451 121.9287:2202 129.10254:80735 130.08661:77500 138.09155:4122 147.11324:96304 156.10194:2730 169.09808:2676 175.11929:5210 180.19997:2237 183.11336:56358 201.10435:3155 201.12383:60668 210.15892:2618 …	70731	245917	786029	224219	514737	134726	317916	487432	290020	358940	464783	1565608	1713537	368506	537651	648490	299474	86656	5860	108579	292670	341297	360185	402758
Gly-Asn	lvl 2A	9.54	190.083	MS & library MS/MS match	[M+H]+	HILIC+	Peptide Cluster 1	Amino acids, peptides, and analogues	FUESBOMYALLFNI-VKHMYHEASA-N	C([C@@H](C(=O)O)NC(=O)CN)C(=O)N	190.08279:1487468 191.08614:130845 192.0895:0	74.02386:11882 75.05537:20256 76.58044:2180 87.04934:2658 87.05547:57750 88.03928:11124 99.00768:2926 100.03935:2802 101.07135:19796 116.03436:19565 127.04047:3919 127.05064:87305 131.09026:4528 133.06114:273423 145.06114:34637 153.9715:1938 155.04552:16024 156.02927:4910 172.07155:2929 173.05629:303784 190.08307:19422 190.12259:10026 190.14378:8243	0	0	1316659	1117550	52785	148202	405457	813263	499381	947537	701584	1698969	1055540	443259	479841	1008244	333291	242065	54374	277942	590206	561288	606740	643348
Gly-His	lvl 2A	9.833	213.099	MS & library MS/MS match	[M+H]+	HILIC+	Peptide Cluster 1	Amino acids, peptides, and analogues	YIWFXZNIBQBFHR-LURJTMIESA-N	C1=C(NC=N1)C[C@@H](C(=O)O)NC(=O)CN	213.09901:3138416 214.10236:126701904 215.10572:13423106	55.83321:2085 57.07024:5404 62.58213:2067 74.56336:2242 82.7827:2573 83.06028:2759 85.05701:1934 85.37745:2763 88.07598:4960 88.19764:2024 95.04954:16957 95.06063:11529 105.04495:3930 110.0716:309478 111.72733:2610 112.08713:4724 122.07156:86794 138.06659:10690 141.00098:48456 142.00435:2608 150.06667:46931 156.07727:487926 158.02748:29278 166.06194:17725 167.09331:165358 178.06165:95527 178.1336…	0	7037	1861606	1343785	76189	40562	293300	1142652	389135	734763	952648	7561604	4294478	723835	753331	1091925	257989	151655	18914	146034	675039	799071	764169	780495
Gly-Met	lvl 2A	8.039	205.064	MS & library MS/MS match	[M-H]-	HILIC-	Peptide Cluster 1	Amino acids, peptides, and analogues	PFMUCCYYAAFKTH-YFKPBYRVSA-N	CSCC[C@@H](C(=O)O)NC(=O)CN	205.06392:572787 206.06727:56353 207.07063:30702	67.22594:2017 73.03912:2720 85.58672:2086 99.05462:14916 113.07037:31412 148.04224:32170 157.06032:92122 161.07422:5075 162.67838:2474 205.06403:87725	0	3961	379256	245486	21165	18663	141086	179605	89440	125637	95634	325413	172178	31867	81538	88156	94961	56932	13536	67180	130216	190632	197400	209379
Gly-Phe	lvl 2A	7.73	223.108	MS & library MS/MS match	[M+H]+	HILIC+	Peptide Cluster 1	Amino acids, peptides, and analogues	JBCLFWXMTIKCCB-VIFPVBQESA-N	C1=CC=C(C=C1)C[C@@H](C(=O)O)NC(=O)CN	223.10835:555299 224.1117:327069 225.11506:24181	81.37485:2280 90.62331:2018 110.73535:2068 120.08118:194479 131.04916:3117 149.06078:3762 161.80347:2316 166.08684:163126 177.10287:60594 223.10934:13314	0	22603	326075	347326	56891	20719	112308	182183	76684	142608	119718	456988	261535	92459	98867	133252	48973	52095	0	53937	169373	163943	154393	171411
Gly-Thr	lvl 2A	9.093	177.087	MS & library MS/MS match	[M+H]+	HILIC+	Peptide Cluster 1	Amino acids, peptides, and analogues	OLIFSFOFKGKIRH-WUJLRWPWSA-N	C[C@H]([C@@H](C(=O)O)NC(=O)CN)O	177.08739:1030896 178.09074:108401 179.0941:0	56.04988:17151 60.04478:8157 63.19809:1978 69.04488:4275 72.88718:2157 74.06023:91159 76.03967:3301 84.04465:8332 86.06009:13343 89.88659:2071 102.05517:97971 113.07109:18274 120.06586:338040 130.05025:50420 131.08182:12870 149.02365:9672 159.07686:179907 177.08768:11102 177.12708:3575	0	6429	1066072	828441	70730	65479	245520	493655	306216	564113	401425	3333179	1572717	335854	333368	577861	302661	268696	45783	200426	471313	487351	480840	522426
HexCer 38:2;3O|HexCer 18:2;2O/20:0;O	lvl 2A	5.843	770.618	MS & library MS/MS match	[M+H]+	CSH+	Peptide Cluster 1	Glycosphingolipids	DCBUKXJYPRDHOR-CUCSTAJMNA-N	CCCCCCCCCCCCCCCCCCC(O)C(=O)NC(COC1OC(CO)C(O)C(O)C1O)C(O)\C=C\CC\C=C\CCCCCCCCC	770.61755:2795226 771.6209:1296070 772.62426:306083	70.0655:3865 79.05448:20150 81.07014:26913 82.06549:6613 83.08601:6664 85.02888:6056 91.05445:14398 93.0703:22168 94.06566:25601 95.08585:25629 96.08112:12363 96.1293:3465 97.10185:10476 105.07018:8129 107.08578:21507 108.08083:3611 109.10155:15959 119.08577:22510 121.10155:36404 123.11704:3688 133.10185:15252 135.11742:22901 143.30156:3542 147.11696:3165 149.13286:3956 161.13316:6273 165.31241:3…	0	0	0	0	0	0	0	0	0	0	0	175617	270220	35906	7779	0	0	0	0	0	9569	36596	48403	65548
His-Ala	lvl 2A	9.468	227.114	MS & library MS/MS match	[M+H]+	HILIC+	Peptide Cluster 1	Amino acids, peptides, and analogues	FRJIAZKQGSCKPQ-FSPLSTOPSA-N	C[C@@H](C(=O)O)NC(=O)[C@H](CC1=CN=CN1)N	227.11427:4850378 228.11762:615473 229.12098:0	58.19485:3256 83.04645:2416 83.06068:16289 84.04436:3717 93.04491:15839 110.0715:1698735 121.04022:4396 128.88283:3236 136.08693:14277 138.0666:92188 156.06462:4653 156.07726:73686 157.45064:3479 164.0822:11377 166.06221:4414 180.60381:3301 181.10878:96410 192.07693:5099 200.73894:4318 209.10376:243813 221.28395:2880 227.11429:534366 227.21931:11980	38666	363432	5729676	7265519	1815779	1690634	4192756	6154697	2051502	2670663	3515677	30810560	21657338	5164894	4571423	4086643	6077660	1603456	1004187	1299957	5229488	5619642	5560503	5828746
His-Asn	lvl 2A	9.857	270.12	MS & library MS/MS match	[M+H]+	HILIC+	Peptide Cluster 1	Amino acids, peptides, and analogues	WSDOHRLQDGAOGU-BQBZGAKWSA-N	C1=C(NC=N1)C[C@@H](C(=O)N[C@@H](CC(=O)N)C(=O)O)N	270.1203:955067 271.12365:100547 272.12701:0	54.00959:1931 59.4165:2513 67.40374:2151 80.76904:2748 83.06062:5255 88.30699:2073 93.04475:4561 104.49857:2070 110.07155:599679 133.06149:17161 136.08698:3334 138.0665:44750 152.5473:1967 156.07715:68595 181.10875:11646 200.42542:3540 207.08806:12762 235.0834:29707 236.99765:2343 252.10968:47087 253.09334:47225 270.06982:3951 270.11993:139488	0	5786	789032	1001229	176103	93966	483539	394740	340402	155759	552702	11139493	5978373	659898	639223	576855	266690	204626	19132	97548	725941	845594	830480	887237
His-Leu	lvl 2A	8.266	269.161	MS & library MS/MS match	[M+H]+	HILIC+	Peptide Cluster 1	Amino acids, peptides, and analogues	MMFKFJORZBJVNF-UWVGGRQHSA-N	CC(C)C[C@@H](C(=O)O)NC(=O)[C@H](CC1=CN=CN1)N	269.16156:739545 270.16491:140153 271.16827:0	58.72739:2002 61.15263:2054 62.35107:2233 63.18881:2328 64.17979:2134 74.09653:3467 83.06043:3813 86.09641:3390 97.2171:2101 97.81596:2027 110.07159:395891 138.06662:28475 156.07732:31242 170.04247:3565 178.13432:12567 223.15567:42157 245.63452:2278 251.15091:61382 269.11334:22018 269.16171:154843	106516	568687	10907457	12028281	1403393	739545	2370392	10571340	3128942	6563944	7102518	17113010	10209556	5862907	6811166	12554007	4379914	2672514	270732	775500	4600112	4774810	5351174	5967179
His-Lys	lvl 2A	10.178	284.173	MS & library MS/MS match	[M+H]+	HILIC+	Peptide Cluster 1	Amino acids, peptides, and analogues	CZVQSYNVUHAILZ-UWVGGRQHSA-N	C1=C(NC=N1)C[C@@H](C(=O)N[C@@H](CCCCN)C(=O)O)N	284.17261:763081 285.17596:76368 286.17932:0	79.93335:2191 83.06033:2744 84.08107:29326 101.10767:3277 110.07162:421051 112.62204:2435 121.04082:2516 125.1067:2269 129.10258:57783 130.08665:18423 138.06613:24473 147.07703:5384 147.11357:35037 155.09305:5547 156.0773:88333 160.21936:2428 221.10336:3406 248.11664:2738 248.15096:20876 249.09874:9618 249.13506:10912 266.12762:8182 266.16165:109502 267.1088:3536 284.13681:15898 284.17239:198394	0	0	0	38364	0	5734	5943	44093	14385	7219	7348	763081	463354	24099	32947	32221	80238	6019	5441	0	11660	6088	11736	0
His-Phe	lvl 2A	8.19	303.146	MS & library MS/MS match	[M+H]+	HILIC+	Peptide Cluster 1	Amino acids, peptides, and analogues	XMAUFHMAAVTODF-STQMWFEESA-N	C1=CC=C(C=C1)C[C@@H](C(=O)O)NC(=O)[C@H](CC2=CN=CN2)N	303.14606:652599 304.14941:129661 305.15277:0	62.55213:2662 72.08096:20375 73.72666:2759 83.06065:10239 86.09662:3497 90.05552:2450 110.07155:509564 121.03962:2541 129.1026:2428 138.06685:31050 147.07664:9928 156.07727:37229 157.0972:4070 166.0618:2678 181.82791:2366 186.12543:4179 200.14064:4119 212.11913:10356 214.72498:2409 241.08286:3152 257.13974:36520 258.10831:3980 285.13492:57032 303.14627:134555	0	0	604041	672040	198625	139622	337042	923940	365967	335748	235770	1337716	400370	320112	419106	838679	178498	133738	75194	158159	337608	345059	289742	361670
His-Pro-Lys	lvl 2A	10.031	381.225	MS & library MS/MS match	[M+H]+	HILIC+	Peptide Cluster 1	Amino acids, peptides, and analogues	PGXZHYYGOPKYKM-UHFFFAOYSA-N	C1CC(N(C1)C(=O)C(CC2=CN=CN2)N)C(=O)NC(CCCCN)C(=O)O	381.22525:753149 382.2286:148524 383.23196:35883	50.24467:2121 59.56937:2730 70.06544:62509 84.08092:37648 90.73717:2184 101.10749:4696 110.07166:141358 116.07116:2894 129.10239:34032 130.08696:12011 138.06711:3776 147.07724:4280 147.11314:39211 155.09369:3226 156.07803:4904 200.11349:3778 209.12988:3804 217.10973:5350 226.15636:24292 227.10742:2521 227.14064:2503 235.11964:159087 244.13191:16037 244.16631:125185 249.09988:4602 253.13237:3228 2…	0	0	166615	102762	21546	9548	11426	40280	10563	24142	58119	703226	753149	231447	110932	133788	56101	0	0	0	14937	0	23888	18153
His-Val	lvl 2A	8.801	255.146	MS & library MS/MS match	[M+H]+	HILIC+	Peptide Cluster 1	Amino acids, peptides, and analogues	VLDVBZICYBVQHB-IUCAKERBSA-N	CC(C)[C@@H](C(=O)O)NC(=O)[C@H](CC1=CN=CN1)N	255.14589:13882133 256.14924:2069328 257.1526:143053	58.00261:5721 58.1803:6658 72.08112:26302 83.06042:45538 93.0449:35655 110.07159:3990749 121.04:13854 138.0666:264080 147.73225:6551 156.07724:294914 164.11893:135755 166.06027:8532 192.11394:32453 206.57094:7718 209.14034:653046 220.11043:7967 237.13536:436154 255.14597:1909622	0	350170	8200371	17902792	1785449	2077725	5753762	20781024	10454313	13817124	10902947	24467080	19287264	9087173	16395239	19012756	3377874	1933162	1327426	5650938	9245784	10213596	11042159	10749228
Ile-Asn	lvl 2A	8.361	246.146	MS & library MS/MS match	[M+H]+	HILIC+	Peptide Cluster 1	Amino acids, peptides, and analogues	HZYHBDVRCBDJJV-HAFWLYHUSA-N	CC[C@H](C)[C@@H](C(=O)N[C@@H](CC(=O)N)C(=O)O)N	246.14546:779226 247.14881:130024 248.15217:0	69.07018:18319 72.08113:3051 85.8681:2153 86.09661:452732 86.21626:2190 87.05555:13925 88.03948:2214 88.74528:2038 98.15666:2138 105.4214:2087 126.05327:3545 133.06111:188117 228.13539:4230 229.11891:35539 246.14545:40044 246.24493:8892	0	0	1147372	1104281	292359	158848	557454	916606	392052	838875	924708	3454358	2242193	597541	793700	1344597	505577	318620	49025	312753	830844	862418	892598	854586
Ile-Asp	lvl 2A	8.041	245.113	MS & library MS/MS match	[M-H]-	HILIC-	Peptide Cluster 1	Amino acids, peptides, and analogues	WKXVAXOSIPTXEC-HAFWLYHUSA-N	CC[C@H](C)[C@@H](C(=O)N[C@@H](CC(=O)O)C(=O)O)N	245.11328:916514 246.11663:142089 247.11999:14550	54.63619:2112 67.61374:2141 67.94174:1785 71.01229:24858 73.78624:2162 88.03875:53320 96.99162:3402 97.22412:2087 112.07417:2984 115.00202:75551 127.9383:2253 129.1017:211936 130.07466:4687 130.08582:121359 132.02847:2850 157.13377:9659 163.32372:2195 183.11217:5113 201.1232:114308 201.31566:2945 209.09227:11445 227.10275:19375 245.11319:180768	24764	60446	440504	350147	88776	47527	302312	404939	247752	308630	266424	1193244	1098612	249036	262586	330462	282538	68631	34268	127744	197582	309289	289158	337698
Ile-His	lvl 2A	8.952	269.162	MS & library MS/MS match	[M+H]+	HILIC+	Peptide Cluster 1	Amino acids, peptides, and analogues	QNBYCZTZNOVDMI-HGNGGELXSA-N	CC[C@H](C)[C@@H](C(=O)N[C@@H](CC1=CN=CN1)C(=O)O)N	269.16168:3159608 270.16503:546605 271.16839:0	54.08372:2729 64.67525:3243 69.07016:13419 74.09661:3441 82.05331:3465 83.06073:5154 86.09663:222708 95.06058:14094 110.0716:441489 112.08681:2819 125.10787:4523 138.06624:12441 155.04332:10092 156.07721:1862504 159.30908:2603 166.06171:105502 178.13499:20958 207.16072:17134 210.77411:2527 223.1564:50115 234.12392:39322 237.82733:2848 249.83723:3652 251.151:208710 252.0609:17447 269.09082:28218 2…	0	31056	2775522	2205476	187724	177009	711742	1399766	491481	995604	943607	14482070	6692340	1018185	852424	955397	1502694	633355	105448	411773	1543299	1600573	1761336	1867382
Ile-Leu	lvl 2A	6.202	243.17	MS & library MS/MS match	[M-H]-	HILIC-	Peptide Cluster 1	Amino acids, peptides, and analogues	JWBXCSQZLLIOCI-GUBZILKMSA-N	CC[C@H](C)[C@@H](C(=O)N[C@@H](CC(C)C)C(=O)O)N	243.17036:1339760 244.17371:185687 245.17707:13296	82.06476:2511 93.05723:2069 112.94082:2224 114.09103:2169 129.10164:9705 130.0858:110303 142.0246:2237 182.15361:2681 194.38596:1881 199.18027:120754 200.47763:2395 200.49557:2200 204.77771:2081 243.17036:410710	335905	765715	9719326	6312466	921154	884182	3362254	7178442	4445726	4168983	4153854	12019525	10135992	4289290	4757122	6313282	3362215	1929108	1339760	2709664	4451909	5653794	5908814	6256572
Ile-Met	lvl 2A	6.794	261.127	MS & library MS/MS match	[M-H]-	HILIC-	Peptide Cluster 1	Amino acids, peptides, and analogues	TUYOFUHICRWDGA-CIUDSAMLSA-N	CC[C@H](C)[C@@H](C(=O)N[C@@H](CCSC)C(=O)O)N	261.12686:213984 262.13021:26668 263.13357:985858	50.05827:1870 65.15041:1970 65.52885:1792 96.37757:1951 110.8223:2202 127.46069:1796 148.04205:12947 155.11714:8855 169.13326:13215 196.87433:4377 196.89633:14378 213.12283:34555 217.13521:3236 261.12677:74233	0	1304	46264	70201	26011	15025	41013	127330	61436	60708	49998	121874	110015	27207	93122	65321	51723	25262	6819	27940	42052	62354	59775	74883
Ile-Phe	lvl 2A	6.346	277.155	MS & library MS/MS match	[M-H]-	HILIC-	Peptide Cluster 1	Amino acids, peptides, and analogues	WMDZARSFSMZOQO-WCFLWFBJSA-N	CC[C@H](C)[C@H](C(=O)N[C@@H](CC1=CC=CC=C1)C(=O)O)N	277.15466:947220 278.15801:163977 279.16137:16790	91.05354:11951 98.17173:1993 109.47198:2053 129.10167:127616 147.04361:31258 164.07031:30580 233.16446:14478 277.15469:157373	40619	100317	1394099	701628	406478	271651	1157094	947220	685500	550564	662526	1279642	1062470	586756	818616	694462	345066	508636	191398	471657	652110	785847	831382	895113
Ile-Pro	lvl 2A	7.277	229.155	MS & library MS/MS match	[M+H]+	HILIC+	Peptide Cluster 1	Amino acids, peptides, and analogues	BBIXOODYWPFNDT-CIUDSAMLSA-N	CC[C@H](C)[C@@H](C(=O)N1CCC[C@H]1C(=O)O)N	229.15533:4554962 230.15868:503412 231.16204:41570	62.36014:3831 67.00247:3281 69.07042:12426 70.06535:455375 86.09662:941214 116.07092:1508033 125.44118:3867 183.149:6654 201.14799:6511 211.7002:3461 229.1554:410676	0	158087	6764399	4382893	267695	641429	2430946	4260285	1573116	2410088	3645513	33087432	15839446	2278847	2474713	3016610	11664153	4904882	1091029	2215942	4592974	4874168	4539852	5056018
Ile-Ser	lvl 2A	8.16	217.118	MS & library MS/MS match	[M-H]-	HILIC-	Peptide Cluster 1	Amino acids, peptides, and analogues	TWVKGYNQQAUNRN-ACZMJKKPSA-N	CC[C@H](C)[C@@H](C(=O)N[C@@H](CO)C(=O)O)N	217.11809:1503481 218.12144:160955 219.1248:3669	52.28194:2273 56.1869:1980 58.02803:10756 60.99115:3749 71.01215:2404 74.02312:90827 89.02254:3434 104.03363:10700 107.50691:1994 129.10147:3276 130.08548:14748 139.08588:2392 141.10165:21434 143.11736:128902 155.11739:141450 169.09665:52545 187.10735:559850 208.25766:2075 217.11807:250140	38750	157451	3868544	1779442	312350	259048	769644	2563026	2130155	2652518	1734956	3038618	2189938	1088899	2103470	2322712	1167204	551847	581525	1573318	1749729	2328355	2236364	2596693
Ile-Tyr	lvl 2A	7.22	295.166	MS & library MS/MS match	[M+H]+	HILIC+	Peptide Cluster 1	Amino acids, peptides, and analogues	MUFXDFWAJSPHIQ-TVYUQYBPSA-N	CC[C@H](C)[C@H](C(=O)N[C@@H](CC1=CC=C(C=C1)O)C(=O)O)N	295.1662:290338 296.16955:19324 297.17291:0	69.07026:12178 80.23032:1817 86.09663:291260 93.5658:2032 136.07645:13046 165.05547:3290 182.08142:24111 219.56987:2211 295.16626:22054	0	11482	587709	353051	10030	61452	197845	265980	238169	435751	253900	466964	420398	240003	294991	396946	125920	109103	30323	129371	244948	233709	233248	233378
Ile-Val	lvl 2A	6.903	229.155	MS & library MS/MS match	[M-H]-	HILIC-	Peptide Cluster 1	Amino acids, peptides, and analogues	BCXBIONYYJCSDF-CIUDSAMLSA-N	CC[C@H](C)[C@@H](C(=O)N[C@@H](C(C)C)C(=O)O)N	229.15463:2402211 230.15798:366107 231.16134:19713	80.04942:2842 82.06441:2402 82.33821:2244 90.74655:2149 100.07513:9330 116.07008:246565 127.08646:2859 129.10152:8460 130.08595:22133 141.0116:2834 143.02849:2972 185.16449:341091 192.34467:2115 202.45813:4168 229.15454:992340	6595	52252	1475445	1038835	283086	253483	1036977	762166	389452	582164	443848	1647295	1106240	393039	505781	466776	677753	322565	157800	565668	717088	1079190	1325149	1481853
Leu-Asn	lvl 2A	8.36	244.129	MS & library MS/MS match	[M-H]-	HILIC-	Peptide Cluster 1	Amino acids, peptides, and analogues	MLTRLIITQPXHBJ-BQBZGAKWSA-N	CC(C)C[C@@H](C(=O)N[C@@H](CC(=O)N)C(=O)O)N	244.12917:1280432 245.13252:166199 246.13588:12359	56.47419:2425 58.02828:13811 62.47124:2202 62.47484:1933 70.02821:42997 74.0231:3185 96.00744:84861 113.03399:3722 114.018:157034 115.85838:2288 119.51381:2178 129.10167:214665 131.04471:17605 141.10146:4055 151.89015:2125 153.81036:2325 155.11751:18969 182.12857:9204 200.13908:23877 200.2803:3709 226.1185:357970 244.12926:237382	2881	19399	1045166	436583	175366	85902	265805	387610	411429	565930	489221	729472	588192	244526	531605	627609	342637	233618	51053	318809	557029	623839	725342	787177
Leu-Gln	lvl 2A	8.117	260.161	MS & library MS/MS match	[M+H]+	HILIC+	Peptide Cluster 1	Amino acids, peptides, and analogues	JYOAXOMPIXKMKK-YUMQZZPRSA-N	CC(C)C[C@@H](C(=O)N[C@@H](CCC(=O)N)C(=O)O)N	260.1611:996079 261.16445:153030 262.16781:26517	71.24252:2328 76.02267:1965 84.04473:19737 86.09656:258714 101.07117:9305 123.02448:1939 129.06525:2245 130.05014:155699 131.11807:19746 143.59938:2305 147.07674:389269 182.73798:2189 226.10812:3360 242.14993:2918 243.13429:36047 260.16132:111383	179290	194249	726601	914950	574976	369072	1424198	1074610	424192	722616	971498	10593861	4167477	957024	1092060	1060148	770077	291990	268092	479982	990089	1124052	1154980	1204596
Leu-Glu	lvl 2A	8.042	261.145	MS & library MS/MS match	[M+H]+	HILIC+	Peptide Cluster 1	Amino acids, peptides, and analogues	NFNVDJGXRFEYTK-YUMQZZPRSA-N	CC(C)C[C@@H](C(=O)N[C@@H](CCC(=O)O)C(=O)O)N	261.14529:6334286 262.14864:1125853 263.152:59992	50.31509:4983 53.0135:5090 55.46978:5020 61.3204:4850 65.40965:4517 69.1674:5114 84.04456:61754 86.09663:4285006 102.05527:63592 116.73544:5683 130.05038:129258 132.10246:22119 143.40279:5352 148.06084:1043719 197.12891:47050 215.14034:40804 219.04678:6022 226.10741:7151 243.13388:72740 261.14542:738297	75385	119646	825800	1112058	370965	255298	870732	1190602	488362	647013	506664	6334286	3432056	614245	748209	820301	866827	328490	462180	560984	719735	826963	755473	824944
Leu-Gly-Gly	lvl 2A	7.998	244.129	MS & library MS/MS match	[M-H]-	HILIC-	Peptide Cluster 1	Amino acids, peptides, and analogues	VWHGTYCRDRBSFI-UHFFFAOYSA-N	CC(C)CC(C(=O)NCC(=O)NCC(=O)O)N	244.1293:238418 245.13265:25286 246.13601:0	68.15804:2074 73.03923:3256 74.0232:57659 130.08615:4440 140.90454:1986 141.10315:3137 143.11734:30000 169.09665:17666 185.68077:2094 200.13904:26910 244.1293:53309	526	508	167669	111126	4577	22036	79742	69479	30940	41040	37685	113829	92964	25660	21944	36242	16389	40520	3689	26297	52191	73474	73943	71326
Leu-Phe	lvl 2A	6.351	279.171	MS & library MS/MS match	[M+H]+	HILIC+	Peptide Cluster 1	Amino acids, peptides, and analogues	KFKWRHQBZQICHA-STQMWFEESA-N	CC(C)C[C@@H](C(=O)N[C@@H](CC1=CC=CC=C1)C(=O)O)N	279.17108:2441014 280.17443:410817 281.17779:0	69.07024:24240 81.80248:2131 86.0966:1102980 99.16361:2619 120.08108:70699 123.25037:2262 149.02399:12956 166.08682:101444 233.16614:9883 246.80498:2727 256.78815:2438 279.13721:7434 279.17166:81143 279.20905:10879	147387	331706	4677924	3278962	1652357	1068467	4897412	3388897	1727546	2350458	2665798	5848760	4139172	2371397	3030773	3136219	1068411	1103056	319152	1169296	2285102	2562641	2554784	2441014
Leu-Pro	lvl 2A	7.379	229.155	MS & library MS/MS match	[M+H]+	HILIC+	Peptide Cluster 1	Amino acids, peptides, and analogues	VTJUNIYRYIAIHF-IUCAKERBSA-N	CC(C)C[C@@H](C(=O)N1CCC[C@H]1C(=O)O)N	229.15538:2469068 230.15873:271952 231.16209:0	58.06551:9409 60.08119:25684 67.92492:2066 70.06537:99917 73.64635:2434 81.17889:2344 86.09663:260595 101.7836:2401 110.06042:3744 114.05536:11193 116.07094:412958 117.91353:2136 124.07591:11139 142.08679:85860 170.08203:11148 199.23003:2545 200.19408:2574 229.15533:1123968	7041	21478	493079	1225758	922588	880289	1530089	1725790	681361	1092109	2469068	24432084	19413698	6353813	3498206	3431981	1289241	443744	63514	295854	2779878	2726100	2829033	2816231
Leu-Thr	lvl 2A	7.889	231.134	MS & library MS/MS match	[M-H]-	HILIC-	Peptide Cluster 1	Amino acids, peptides, and analogues	LRKCBIUDWAXNEG-CSMHCCOUSA-N	C[C@H]([C@@H](C(=O)O)NC(=O)[C@H](CC(C)C)N)O	231.13397:232043 232.13732:18291 233.14068:0	56.14794:1985 74.02292:9825 79.17692:1879 80.53153:1895 82.52055:2395 101.35423:2058 130.08556:8690 141.10115:3413 143.11771:19398 169.09685:3739 182.00073:1873 187.10732:77773 231.134:16755	908	1371	92854	131770	9862	12018	66356	158105	101388	101752	84147	204180	220112	71742	110338	98895	50721	34275	18043	68252	79564	117992	119878	134211
Leu-Tyr	lvl 2A	7.129	295.166	MS & library MS/MS match	[M+H]+	HILIC+	Peptide Cluster 1	Amino acids, peptides, and analogues	LHSGPCFBGJHPCY-STQMWFEESA-N	CC(C)C[C@@H](C(=O)N[C@@H](CC1=CC=C(C=C1)O)C(=O)O)N	295.1662:600730 296.16955:110058 297.17291:0	52.7279:2297 53.22806:2097 53.73003:2011 71.66398:2184 76.70975:2185 86.0966:427012 86.48917:2147 92.10258:2126 101.63859:2430 112.45334:2324 136.076:26147 165.05583:18363 182.0818:59033 200.16373:4632 249.16133:4374 295.16617:30695	0	0	334159	296211	38548	18365	85211	241728	139364	193508	94749	331041	229057	153617	147222	258134	160961	115301	6958	7606	149082	130544	130743	148071
Lys-Met	lvl 2A	9.244	278.154	MS & library MS/MS match	[M+H]+	HILIC+	Peptide Cluster 1	Amino acids, peptides, and analogues	XBZOQGHZGQLEQO-IUCAKERBSA-N	CSCC[C@@H](C(=O)O)NC(=O)[C@H](CCCCN)N	278.15427:1189656 279.15762:213321 280.16098:36390	56.00268:2313 56.04987:5345 70.06564:4262 84.08106:712813 101.1077:48194 102.09155:9038 104.05299:20126 112.07569:4600 124.76185:2080 129.10263:171763 130.08667:19680 131.54666:2083 133.03189:2737 133.14832:2650 147.11334:70030 150.05896:4864 159.07651:5123 167.1178:2889 244.10027:4227 248.06264:2500 260.11526:3482 260.1441:4037 261.12756:108935 278.15436:277330	0	0	574339	1839271	99480	39893	243024	1378812	129625	487746	487700	2190500	931021	273226	355406	844576	252574	16324	0	62082	376619	368298	403321	395120
Lys-Phe	lvl 2A	8.888	294.182	MS & library MS/MS match	[M+H]+	HILIC+	Peptide Cluster 1	Amino acids, peptides, and analogues	QCZYYEFXOBKCNQ-STQMWFEESA-N	C1=CC=C(C=C1)C[C@@H](C(=O)O)NC(=O)[C@H](CCCCN)N	294.18213:1736794 295.18548:324837 296.18884:40876	56.05003:3854 56.9752:2259 57.14188:2293 57.57369:2581 66.86563:2064 67.05469:2923 67.49399:2294 84.08102:1136204 101.1076:82505 101.11516:3640 102.09129:3962 112.07619:4895 120.08133:28945 129.10262:327309 130.08659:33629 134.83847:2333 137.0598:2894 143.28247:2331 147.1133:105910 155.07024:2282 158.82297:3136 166.08679:17738 185.11903:2122 201.31862:2695 209.62462:2230 231.14961:3879 259.14493:…	40268	102388	1240760	1736794	792037	377707	800654	2292770	878615	1278641	868688	2227216	1497238	952060	1199050	1987307	915081	394662	397981	388152	1120530	1305868	1239103	1301399
Lys-Pro	lvl 2A	9.658	244.166	MS & library MS/MS match	[M+H]+	HILIC+	Peptide Cluster 1	Amino acids, peptides, and analogues	AIXUQKMMBQJZCU-IUCAKERBSA-N	C1C[C@H](N(C1)C(=O)[C@H](CCCCN)N)C(=O)O	244.1662:1277217 245.16955:250545 246.17291:175059	50.69702:2102 55.83768:2182 65.50729:2330 70.06538:31148 84.08096:387594 101.10033:3938 101.10749:67373 116.07075:40615 129.10258:57201 130.08675:10371 147.11298:43329 200.99564:4369 201.77838:2174 209.12943:19557 226.1554:28480 227.13921:32328 244.16614:158193	98767	123024	677305	1197402	236582	391098	1916053	1339179	339759	744999	1632680	16993256	13651546	2970120	2311123	3412866	1512167	480673	132010	1074678	1999788	2459493	2107484	2013040
Lys-Thr	lvl 2A	9.819	248.161	MS & library MS/MS match	[M+H]+	HILIC+	Peptide Cluster 1	Amino acids, peptides, and analogues	ZOKVLMBYDSIDKG-CSMHCCOUSA-N	C[C@H]([C@@H](C(=O)O)NC(=O)[C@H](CCCCN)N)O	248.16125:2873509 249.1646:334770 250.16796:0	56.04988:5550 58.62837:2539 67.05463:4151 74.06029:9892 82.06461:2702 84.08102:1369012 85.06503:22786 87.05615:2062 88.03931:5080 101.10764:122240 102.09161:37374 107.72843:2247 112.0758:4469 120.06608:12026 129.10258:364998 130.05016:13193 130.08669:42187 133.06128:5376 136.42163:2343 147.11324:108152 147.12625:4482 151.08745:2682 185.13052:3288 192.52049:2736 212.14015:3060 213.12413:20866 214.…	0	48441	3121654	3641909	760257	259059	802243	3446763	947368	1968035	2992669	21618926	12556430	2873509	1839724	4364854	2532736	1265436	94108	258624	1711298	2180285	2083959	2236461
Met-Asp	lvl 2A	8.341	263.07	MS & library MS/MS match	[M-H]-	HILIC-	Peptide Cluster 1	Amino acids, peptides, and analogues	QTZXSYBVOSXBEJ-WDSKDSINSA-N	CSCC[C@@H](C(=O)N[C@@H](CC(=O)O)C(=O)O)N	263.0697:356569 264.07305:42739 265.07641:19183	60.10211:2272 71.01234:12331 88.03893:13671 99.05482:8293 115.00198:29444 147.05827:38511 148.04219:32336 180.41617:2019 199.55719:9280 219.07999:39104 245.05881:2680 263.06976:59323	0	0	25786	64001	9964	8879	52897	59455	45121	29239	25247	110952	58089	10636	53230	21499	17018	5036	3198	31526	33232	43359	51737	57483
Met-Glu	lvl 2A	8.317	277.085	MS & library MS/MS match	[M-H]-	HILIC-	Peptide Cluster 1	Amino acids, peptides, and analogues	ADHNYKZHPOEULM-BQBZGAKWSA-N	CSCC[C@@H](C(=O)N[C@@H](CCC(=O)O)C(=O)O)N	277.08524:530497 278.08859:42152 279.09195:328905	58.53151:1927 59.05754:2584 67.55741:2652 77.09609:2040 84.13534:1863 102.05466:13475 103.53544:2297 106.32261:2239 128.03362:41634 146.04521:2353 147.05861:2464 148.04216:60458 215.08517:7949 225.65794:2301 233.09566:33272 259.07458:34533 277.08521:67590	562	3014	156846	155564	35162	26677	129515	181969	109266	98089	56843	213224	165600	31252	88463	58827	166628	45434	9183	30902	89820	133886	136370	145960
Met-Ile	lvl 2A	6.452	261.127	MS & library MS/MS match	[M-H]-	HILIC-	Peptide Cluster 1	Amino acids, peptides, and analogues	OGGRSJFVXREKOR-CIUDSAMLSA-N	CCC(C)C(C(=O)O)NC(=O)C(CCSC)N	261.12686:992787 262.13021:119929 263.13357:74009	53.77097:2153 65.31134:1979 104.84742:2058 114.09055:2549 130.08571:77510 169.13329:4595 213.12375:3183 249.84703:2194 261.12677:246117	42125	54858	1516187	875766	91571	40997	135267	917913	412410	327689	401050	663767	521174	255661	422309	494298	284239	185331	21525	407801	381725	444072	518227	558435
Met-Phe	lvl 2A	6.522	297.128	MS & library MS/MS match	[M+H]+	HILIC+	Peptide Cluster 1	Amino acids, peptides, and analogues	HGCNKOLVKRAVHD-RYUDHWBXSA-N	CSCC[C@@H](C(=O)N[C@@H](CC1=CC=CC=C1)C(=O)O)N	297.12766:1452344 298.13101:357901 299.13437:100104	51.71957:2287 56.04986:211788 61.01097:57597 62.56829:2229 66.16315:2067 74.06018:13425 97.47738:2595 104.05307:592786 112.09365:2174 120.0811:52592 166.08667:87689 175.08783:3771 203.118:2695 206.10083:4541 232.09836:12612 249.12424:35490 251.12248:10589 280.10202:3083 297.12634:50008	0	0	1452344	298996	45664	14790	84844	189027	98590	81759	84393	233022	156165	92278	217778	168064	19130	13004	12405	40526	126506	134693	130773	120090
Met-Trp	lvl 2A	6.56	336.138	MS & library MS/MS match	[M+H]+	HILIC+	Peptide Cluster 1	Amino acids, peptides, and analogues	XYVRXLDSCKEYES-JSGCOSHPSA-N	CSCC[C@@H](C(=O)N[C@@H](CC1=CNC2=CC=CC=C21)C(=O)O)N	336.13846:1696872 337.14181:409863 338.14517:109167	56.04988:265818 56.99506:2359 58.15745:2204 61.01094:71706 62.99047:2131 74.06018:9498 101.07116:27319 104.05309:627177 118.08251:2617 130.06543:17140 132.08128:9386 144.08153:4096 146.06047:38498 158.08397:3275 159.05913:12275 159.0921:31214 187.08708:3452 188.07109:570295 197.10619:2898 205.09776:485730 217.46198:3177 223.71443:2618 225.10416:3294 243.11438:10543 245.11125:5336 271.10873:18366 …	0	0	1696872	1291972	5239	122331	389181	1290280	430506	868616	1171104	1578047	1603567	648694	692458	1117164	374956	586566	56917	235127	608179	645046	640814	601905
Octanoylcarnitine	lvl 2A	4.755	288.218	MS & library MS/MS match	[M+H]+	HILIC+	Peptide Cluster 1	Fatty acid esters	CXTATJFJDMJMIY-CYBMUJFWSA-N	CCCCCCCC(=O)O[C@H](CC(=O)[O-])C[N+](C)(C)C	288.21774:1166756 289.22109:214737 290.22445:79215	57.0703:4472 60.08114:43860 63.91624:2168 66.92654:2063 74.60832:2158 75.39738:2073 85.02861:414395 127.11195:22143 144.10255:5291 155.13338:2306 196.74477:6641 196.7657:6546 229.14401:68187 237.35155:2283 243.49831:2034 246.1322:10549 263.29117:2460 288.0878:2901 288.21765:287213	7321	23738	1166756	443250	256326	84470	114537	295195	118615	210854	286779	420825	326573	195610	188317	219704	565517	263930	47567	86854	254250	240927	252789	208888
Phe-Ala	lvl 2A	7.393	237.124	MS & library MS/MS match	[M+H]+	HILIC+	Peptide Cluster 1	Amino acids, peptides, and analogues	MIDZLCFIAINOQN-WPRPVWTQSA-N	C[C@@H](C(=O)O)NC(=O)[C@H](CC1=CC=CC=C1)N	237.12407:803330 238.12742:141586 239.13078:0	50.12196:2239 50.3085:1947 55.93463:4281 71.41465:2158 78.01998:2377 90.0553:3500 91.9726:2236 120.08115:1081146 130.59714:2160 146.13379:2308 148.11276:5121 171.6331:2395 175.12335:5330 183.9136:4565 191.12006:4300 213.92322:22967 231.93404:9081 237.09723:3232 237.1246:73751 237.15323:7591	0	65469	985057	1032744	90750	127758	369473	1077448	368420	725540	1405799	2970809	2128630	682712	803330	1060925	395924	260050	247711	319962	599385	614142	589856	619748
Phe-Asn	lvl 2A	8.185	278.114	MS & library MS/MS match	[M-H]-	HILIC-	Peptide Cluster 1	Amino acids, peptides, and analogues	BXNGIHFNNNSEOS-UWVGGRQHSA-N	C1=CC=C(C=C1)C[C@@H](C(=O)N[C@@H](CC(=O)N)C(=O)O)N	278.11353:322915 279.11688:52340 280.12024:5211	50.04388:2489 54.08352:2061 56.60012:1830 58.24844:2157 70.0281:11526 71.02348:22969 91.0535:2284 95.71548:2267 96.00739:16526 114.01797:42086 131.0446:2864 142.0612:3683 146.05983:8809 163.08595:13716 234.12175:2213 260.10284:74354 278.11377:50776	0	7799	207770	213103	12076	20351	129735	199828	135774	187249	159063	228765	208555	78758	120575	142538	45991	50845	31767	103796	102584	134044	142552	150833
Phe-Gln	lvl 2A	8.056	294.146	MS & library MS/MS match	[M+H]+	HILIC+	Peptide Cluster 1	Amino acids, peptides, and analogues	KLAONOISLHWJEE-QWRGUYRKSA-N	C1=CC=C(C=C1)C[C@@H](C(=O)N[C@@H](CCC(=O)N)C(=O)O)N	294.14572:482156 295.14907:86151 296.15243:0	62.69386:2111 66.67521:2053 79.99191:2187 84.04453:13849 101.07136:5393 120.08112:240863 130.05026:102594 131.04967:4497 136.45268:2185 146.38039:2105 147.07683:203471 165.10283:16901 225.90831:2121 260.09158:3554 276.1355:2563 277.11908:27166 294.14572:73665 294.21167:2462	0	0	264215	505104	60246	60191	326052	454437	191080	496901	448926	3130641	1842249	297356	338807	482156	234453	203385	99879	172617	363043	384209	378102	390333
Phe-Leu	lvl 2A	5.784	277.155	MS & library MS/MS match	[M-H]-	HILIC-	Peptide Cluster 1	Amino acids, peptides, and analogues	RFCVXVPWSPOMFJ-STQMWFEESA-N	CC(C)C[C@@H](C(=O)O)NC(=O)[C@H](CC1=CC=CC=C1)N	277.15475:3856442 278.1581:780057 279.16146:67277	61.92478:3096 78.96791:3008 84.08014:4182 91.05373:145583 91.24252:3643 111.71061:4064 112.59929:3711 118.06469:5233 130.08571:606206 131.04872:6539 141.10173:367823 167.08113:12862 199.33029:9863 216.13785:75871 253.49136:4074 276.1897:4074 277.15469:1342375	220254	327133	3026158	3679914	399286	295107	669719	3856442	1492303	1691588	1720417	3471732	2726823	1657272	1592005	2720971	1638204	1276866	645008	788584	1485638	1722399	1746295	2044888
Phe-Thr	lvl 2A	7.696	265.118	MS & library MS/MS match	[M-H]-	HILIC-	Peptide Cluster 1	Amino acids, peptides, and analogues	NYQBYASWHVRESG-MIMYLULJSA-N	C[C@H]([C@@H](C(=O)O)NC(=O)[C@H](CC1=CC=CC=C1)N)O	265.11844:257499 266.12179:55284 267.12515:0	54.13457:2079 55.11797:2032 56.02279:2529 68.27804:2262 74.02327:17486 85.03907:28308 91.0537:4500 111.01836:8029 160.0755:3236 175.08643:3641 203.08099:9697 221.092:95296 265.11777:16884	0	7060	71159	278325	64407	39532	168379	172823	84058	99085	67810	151512	175427	61803	102414	87151	25395	30124	13530	42473	85531	150108	165361	200965
Phe-Trp	lvl 2A	5.984	352.167	MS & library MS/MS match	[M+H]+	HILIC+	Peptide Cluster 1	Amino acids, peptides, and analogues	JMCOUWKXLXDERB-WMZOPIPTSA-N	C1=CC=C(C=C1)C[C@@H](C(=O)N[C@@H](CC2=CNC3=CC=CC=C32)C(=O)O)N	352.16672:678783 353.17007:199555 354.17343:0	89.97439:2133 103.05406:3345 110.08408:3536 118.75124:2207 120.08112:566204 128.06219:2321 130.06551:10788 132.08127:5290 132.43211:2368 145.05028:3802 146.06081:19076 147.0923:3605 157.99402:2607 159.09235:17650 175.08739:28308 187.08707:2865 188.07111:309748 199.18889:10159 205.09773:252719 306.16043:10716 334.1571:3060 352.12195:8953 352.16745:120016 352.2193:5293	20063	28804	517200	718857	11871	28928	164531	611631	192658	454948	565218	833433	678783	338049	291469	491110	124476	180303	12075	78444	321039	310636	310050	307731
Phe-Tyr	lvl 2A	6.809	327.134	MS & library MS/MS match	[M-H]-	HILIC-	Peptide Cluster 1	Amino acids, peptides, and analogues	FSXRLASFHBWESK-HOTGVXAUSA-N	C1=CC=C(C=C1)CC(C(=O)NC(CC2=CC=C(C=C2)O)C(=O)O)N	327.13385:192416 328.1372:35997 329.14056:3526	64.60683:1826 71.02345:23153 91.05399:4007 92.07557:2367 105.99325:1909 119.04938:8721 129.46176:2102 135.99918:2013 146.05966:3098 158.05974:1962 163.03857:3678 163.0862:4949 164.07011:3524 175.53748:2183 180.06587:14473 191.08136:33475 193.493:2195 221.0916:4057 266.1192:3961 283.14633:4574 327.13416:67866 327.2189:2719	22091	44878	124063	185036	28072	19711	59610	162180	138891	143179	136135	173802	152642	87227	88991	123245	78689	68709	14535	54230	77300	114801	142031	146453
Phe-Val	lvl 2A	6.223	263.139	MS & library MS/MS match	[M-H]-	HILIC-	Peptide Cluster 1	Amino acids, peptides, and analogues	IEHDJWSAXBGJIP-RYUDHWBXSA-N	CC(C)[C@@H](C(=O)O)NC(=O)[C@H](CC1=CC=CC=C1)N	263.13907:865244 264.14242:157238 265.14578:23601	74.02304:15367 75.82571:1885 87.36355:1921 91.05383:18861 96.95821:5189 104.49548:2154 108.34814:2015 116.0701:57900 127.08608:49487 180.43611:2426 182.94635:2130 201.40382:1950 202.12289:11912 263.13947:178955	0	22765	865244	810649	147174	130122	266779	1029886	545967	328150	343251	904041	687852	515827	499169	708754	328983	341307	144857	296190	395867	452380	543883	532210
Pro-Ala	lvl 2A	8.052	185.092	MS & library MS/MS match	[M-H]-	HILIC-	Peptide Cluster 1	Amino acids, peptides, and analogues	FELJDCNGZFDUNR-WDSKDSINSA-N	C[C@@H](C(=O)O)NC(=O)[C@@H]1CCCN1	185.09177:825034 186.09512:103405 187.09848:50547	62.66571:1968 64.30499:1920 66.03309:2865 72.0438:9816 88.03873:94165 107.60832:1988 113.07061:20231 116.92702:2783 121.11525:2156 139.08604:4807 141.06531:11614 141.09026:3943 141.10168:50612 149.35231:2480 165.17918:1955 167.08063:2764 185.09169:406205	393	24230	596062	354914	101509	114807	516944	375415	156381	163593	499043	909056	679792	215236	118693	132851	318512	98242	17049	196537	359378	481648	477136	516410
Pro-Asp	lvl 2A	8.69	229.082	MS & library MS/MS match	[M-H]-	HILIC-	Peptide Cluster 1	Amino acids, peptides, and analogues	GLEOIKLQBZNKJZ-WDSKDSINSA-N	C1C[C@H](NC1)C(=O)N[C@@H](CC(=O)O)C(=O)O	229.08191:319103 230.08526:30334 231.08862:124905	52.90376:2106 71.01207:2601 88.03876:8534 113.03407:2681 113.07047:62861 114.0545:35915 115.00164:21876 141.1017:3549 167.08102:3053 185.09186:55050 211.07117:10692 229.08199:69105	1550	11703	265362	147381	22628	37420	105934	127094	124016	76226	265003	319103	235519	153035	116529	191839	43330	31546	4707	98689	136790	176942	205936	212261
Pro-Gly	lvl 2A	8.4	171.076	MS & library MS/MS match	[M-H]-	HILIC-	Peptide Cluster 1	Amino acids, peptides, and analogues	RNKSNIBMTUYWSH-YFKPBYRVSA-N	C1C[C@H](NC1)C(=O)NCC(=O)O	171.07597:726707 172.07932:69603 173.08268:17045	58.02825:19720 74.02309:34427 99.05473:19366 110.79778:2115 123.96935:2047 125.07062:17846 127.07559:4655 127.08589:79110 134.87726:2235 150.09982:2432 153.06599:2342 171.01854:9315 171.07596:264314	1156	17962	256292	116878	35142	49751	98900	143667	58689	66712	337529	451896	444774	193093	71472	110751	47830	46179	14365	154718	185422	201898	206877	229721
Pro-Lys	lvl 2A	9.569	244.166	MS & library MS/MS match	[M+H]+	HILIC+	Peptide Cluster 1	Amino acids, peptides, and analogues	RVQDZELMXZRSSI-IUCAKERBSA-N	C1C[C@H](NC1)C(=O)N[C@@H](CCCCN)C(=O)O	244.16641:1428920 245.16976:267371 246.17312:0	53.82647:2016 70.06536:484264 84.04475:14612 84.08099:288790 85.00944:2278 85.20067:2083 88.039:2457 99.09193:4066 101.10758:79418 115.08691:4279 116.07075:18329 129.10258:168293 130.0867:74201 133.06113:4959 147.11317:211025 175.96185:2481 176.08339:2542 181.06056:3123 181.13441:4883 185.05664:3376 209.129:27149 226.15582:94519 226.17989:5919 227.0672:11334 227.13966:28129 227.45819:2533 244.166…	8786	8041	403806	457653	299939	338520	895945	683187	135566	343812	847491	5961355	3974934	849697	668459	1165937	1428920	404434	52252	438136	785752	918981	877405	883921
PyroGlu-Pro	lvl 2A	8.739	227.103	MS & library MS/MS match	[M+H]+	HILIC+	Peptide Cluster 1	Amino acids, peptides, and analogues	PFEJJYZYEFRQEA-UHFFFAOYSA-N	C1CC(N(C1)C(=O)C2CCC(=O)N2)C(=O)O	227.10315:2077772 228.1065:276549 229.10986:964096	56.04987:5453 70.06532:392126 75.31753:2670 83.06051:28249 84.04459:629026 84.06348:22884 89.41176:2234 110.07156:3909 116.07088:1330555 129.06598:9204 130.06963:3278 147.28912:2473 153.18198:2546 179.38609:2594 181.09761:202301 203.37981:2595 209.09259:144809 213.84218:2297 227.1033:565318 227.12312:101588 227.22029:12256	0	0	23517	291276	73814	91687	419327	538482	9665	227459	1809441	24946084	12941026	1747352	546774	524325	1601034	374176	22816	171947	1639094	1648746	1786017	1807581
Ser-Asn	lvl 2A	9.627	220.093	MS & library MS/MS match	[M+H]+	HILIC+	Peptide Cluster 1	Amino acids, peptides, and analogues	LTFSLKWFMWZEBD-IUYQGCFVSA-N	C([C@@H](C(=O)O)NC(=O)[C@H](CO)N)C(=O)N	220.09349:1225599 221.09684:87631 222.1002:0	60.04475:331218 70.02924:3947 74.02396:3938 76.03957:3271 87.05559:61491 88.03953:11144 95.04943:8831 96.05264:4814 97.0285:8791 104.9736:2555 105.06602:4485 106.04987:2798 115.05058:16835 116.03473:12182 128.23759:2431 129.06639:3163 133.06114:384700 140.03447:9475 141.00142:4377 142.00418:8415 143.03456:15138 143.04604:3341 157.06093:24010 161.04424:2980 167.04558:3655 169.88763:2314 175.07135:…	0	14680	531004	499606	151662	298173	671929	319301	244217	285705	202139	1225599	654969	193424	258037	313548	146044	86231	41731	162985	323513	309513	296981	350043
Ser-Asp	lvl 2A	9.487	221.077	MS & library MS/MS match	[M+H]+	HILIC+	Peptide Cluster 1	Amino acids, peptides, and analogues	VBKBDLMWICBSCY-IMJSIDKUSA-N	C([C@@H](C(=O)O)NC(=O)[C@H](CO)N)C(=O)O	221.0775:503346 222.08085:25035 223.08421:0	52.13829:1960 54.07156:1857 60.04476:227639 70.42065:2594 74.02437:1861 83.2504:2033 88.03944:11436 90.97693:2899 93.26305:1886 95.04926:2655 97.42441:2032 116.03448:8208 134.03421:3575 134.04515:78237 142.22423:1988 142.99594:3024 157.06171:8281 169.41031:1968 175.07137:2450 178.57234:2095 203.06613:19118 206.15445:2060 221.04225:2364 221.05331:2478 221.07724:40016	0	0	102612	255703	96131	41678	185033	162472	125594	172886	109256	579343	352398	91500	116041	210655	69025	9588	0	106886	164183	163568	143910	149038
Ser-Gln	lvl 2A	9.518	234.109	MS & library MS/MS match	[M+H]+	HILIC+	Peptide Cluster 1	Amino acids, peptides, and analogues	UJTZHGHXJKIAOS-CRCLSJGQSA-N	C(CC(=O)N)[C@H](C(=O)O)NC(=O)[C@H](CO)N	234.10916:3041016 235.11251:360150 236.11587:108240	54.23919:2279 60.04473:805555 70.02894:70007 74.06015:12851 79.28915:2744 82.71584:2517 83.02679:2267 83.06064:4479 84.04462:67809 84.05014:3870 87.05573:4318 88.03923:3400 96.1951:2487 99.74794:2533 100.38866:2462 101.07099:38868 105.06613:240992 106.05016:13348 126.05549:17562 127.14903:2473 129.06593:11109 130.05023:425156 133.06139:9295 147.0768:624021 153.06686:2466 154.05034:15694 164.03481…	30857	158083	3041016	2219340	777490	508542	1022296	1713704	739295	1206598	1160721	8716219	3843910	976341	1003904	1211588	1896640	520884	405956	605329	1691236	1810424	1837107	1964717
Ser-His	lvl 2A	9.902	243.11	MS & library MS/MS match	[M+H]+	HILIC+	Peptide Cluster 1	Amino acids, peptides, and analogues	YZMPDHTZJJCGEI-BQBZGAKWSA-N	C1=C(NC=N1)C[C@@H](C(=O)O)NC(=O)[C@H](CO)N	243.10965:1078436 244.113:99077 245.11636:0	60.04469:19311 73.47752:2194 83.06049:2932 94.93732:2025 95.06097:2647 110.07165:213657 112.08688:2966 122.0718:4644 138.06662:9403 152.08208:16969 156.07735:306445 166.06218:17555 167.09294:19442 179.09346:13210 180.07835:5309 190.06096:3172 195.08826:16976 196.07187:3214 197.10475:30508 198.18542:3824 199.35541:5262 207.08949:9480 208.07208:25302 210.52332:2168 225.09895:138931 243.10973:162484	0	0	593491	1323403	156861	191683	494666	823858	353104	441334	526410	3437438	2466876	476073	655066	649165	326871	107390	62542	196708	488211	497022	552010	555661
Ser-Met	lvl 2A	8.21	235.075	MS & library MS/MS match	[M-H]-	HILIC-	Peptide Cluster 1	Amino acids, peptides, and analogues	PBUXMVYWOSKHMF-WDSKDSINSA-N	CSCC[C@@H](C(=O)O)NC(=O)[C@H](CO)N	235.07475:663762 236.0781:97181 237.08146:96530	56.2847:2371 59.01229:2742 59.57307:1962 63.86946:2116 70.32163:2205 83.18974:1992 105.33075:1843 113.07037:15176 141.2216:2173 143.08109:2962 148.04205:54531 157.06033:77867 161.07397:23130 173.32062:1944 187.07118:13282 205.06401:158887 217.06416:4953 235.07458:116880	7145	15703	324564	265318	87240	64806	249933	305052	209515	198779	116755	663762	358617	53106	176662	144456	214035	139862	22330	104856	202676	273104	295667	328910
Ser-Pro-Lys	lvl 2A	9.771	331.198	MS & library MS/MS match	[M+H]+	HILIC+	Peptide Cluster 1	Amino acids, peptides, and analogues	NMZXJDSKEGFDLJ-UHFFFAOYSA-N	C1CC(N(C1)C(=O)C(CO)N)C(=O)NC(CCCCN)C(=O)O	331.19846:1888652 332.20181:361008 333.20517:33939	58.20595:2284 60.04465:15333 70.061:5346 70.06532:144019 80.09552:2193 84.08095:82643 101.10731:15446 116.07068:2392 117.3105:2513 129.10249:74747 130.07632:4602 130.08659:104739 139.08702:3668 140.17509:2467 146.46706:2419 147.11313:203954 155.08282:2662 157.09755:181744 159.8741:2316 185.09265:111248 203.52052:2440 226.15594:49657 244.1662:168364 266.15335:2181 278.15088:2832 295.17651:12949 30…	0	91163	4058861	5354568	498426	228865	589266	5278989	992058	2931384	3639803	19626238	11035297	3668897	1402105	5713424	2644082	711781	12831	130055	2424788	2334241	2558421	2380174
Ser-Ser	lvl 2A	9.525	193.083	MS & library MS/MS match	[M+H]+	HILIC+	Peptide Cluster 1	Amino acids, peptides, and analogues	XZKQVQKUZMAADP-IMJSIDKUSA-N	C([C@@H](C(=O)N[C@@H](CO)C(=O)O)N)O	193.0825:4199668 194.08585:416956 195.08921:0	52.9713:2437 58.43151:2390 60.04471:2288251 69.034:2467 70.02885:13112 77.39974:2477 84.04456:9658 88.03949:33347 95.04925:5901 100.0397:3525 102.05511:25393 106.0501:964402 110.47137:2705 111.04395:10426 116.03453:73679 129.05522:8552 129.06595:23524 130.05055:19212 144.70244:2385 145.06107:3956 146.04521:31880 147.0656:3819 147.07703:45592 157.06157:16384 172.63292:2836 175.07175:332910 193.082…	0	105525	1686520	1200482	226417	292379	760139	1029942	602455	667754	534864	4199668	2021614	521700	861013	911711	541744	265815	224665	623863	954063	1019515	1044022	1047232
Ser-Thr	lvl 2A	9.251	207.098	MS & library MS/MS match	[M+H]+	HILIC+	Peptide Cluster 1	Amino acids, peptides, and analogues	LDEBVRIURYMKQS-WISUUJSJSA-N	C[C@H]([C@@H](C(=O)O)NC(=O)[C@H](CO)N)O	207.09825:1661113 208.1016:149026 209.10496:0	56.04979:10790 58.11863:1976 60.0448:342224 70.02915:2509 74.05606:3080 74.06033:56715 77.07254:2435 98.06024:4260 102.05533:57583 106.04991:12412 110.0004:2502 116.07072:19941 120.06597:414727 130.04013:3911 130.05037:89613 143.0818:14103 150.06517:2333 160.06064:12334 161.09244:10515 171.07724:3558 189.08775:172759 206.65387:11994 207.09836:47282	0	75020	1539287	1531578	246809	239522	851696	1423914	729000	1030440	819867	5171426	3070708	718559	1372491	1497366	848949	353617	235568	654627	1099270	1117712	1164674	1101309
Ser-Val	lvl 2A	8.224	205.119	MS & library MS/MS match	[M+H]+	HILIC+	Peptide Cluster 1	Amino acids, peptides, and analogues	ILVGMCVCQBJPSH-WDSKDSINSA-N	CC(C)[C@@H](C(=O)O)NC(=O)[C@H](CO)N	205.11893:3333496 206.12228:373164 207.12564:38753	55.05478:3597 60.04473:953199 70.02906:3505 72.08096:334955 84.08153:3124 87.05553:44425 105.77435:2234 114.09167:47164 118.08649:734762 141.10251:10924 158.08142:4083 159.11322:636232 175.49443:2526 187.10828:112712 188.07135:2957 200.58513:4011 205.11882:243043	0	116261	2317204	3156244	560563	548644	1909542	2438071	1244380	2191333	1591875	5754416	3390066	1458228	1957494	2467992	1116204	552922	475894	1050470	1663474	1764408	1955130	1921067
Stercobilin	lvl 2A	5.529	595.351	MS & library MS/MS match	[M+H]+	HILIC+	Peptide Cluster 1	Bilirubins	TYOWQSLRVAUSMI-UHFFFAOYSA-N	CCC1C(C(=O)NC1CC2=NC(=CC3=C(C(=C(N3)CC4C(C(C(=O)N4)CC)C)C)CCC(=O)O)C(=C2C)CCC(=O)O)C	595.35046:10279309 596.35381:4444964 597.35717:927004	54.59364:9146 55.05459:95846 63.01502:8802 70.4925:8977 72.90865:10735 83.08099:13093 83.08572:230773 108.08066:41906 111.29001:9588 118.1323:9049 124.07619:12491 126.08183:15159 126.09168:363627 134.09645:14853 152.07086:44189 166.08669:625308 178.08681:101110 180.08585:17128 180.10236:357499 194.08247:21987 197.02728:41926 197.0486:20567 272.15143:20760 273.16205:9011 285.16141:100553 303.17172…	0	0	15898053	3557447	758579	1009630	1803260	4958008	2095506	6739676	7234961	10279309	9259892	3058118	4168332	7369808	2407149	1397750	554173	1269590	2919112	3595546	3109267	3173507
Thr-Ala	lvl 2A	8.609	191.103	MS & library MS/MS match	[M+H]+	HILIC+	Peptide Cluster 1	Amino acids, peptides, and analogues	VPZKQTYZIVOJDV-LMVFSUKVSA-N	C[C@H]([C@@H](C(=O)N[C@@H](C)C(=O)O)N)O	191.10313:888148 192.10648:91763 193.10984:0	56.04989:34522 58.06544:16950 72.81128:1920 74.06017:493359 78.53948:2198 84.04441:25562 90.05534:27587 96.3511:1916 101.07111:3805 103.69478:2008 113.35206:2158 127.0871:4466 145.09758:14931 153.87245:2437 173.09242:32411 174.07634:4424 191.04079:3079 191.10303:50032	0	50250	1090236	1188405	587284	160525	431991	1649374	592678	717521	674439	3591591	2354701	602596	1310070	1190328	241246	120750	140247	531451	818724	843963	797215	869290
Thr-Asp	lvl 2A	9.233	233.077	MS & library MS/MS match	[M-H]-	HILIC-	Peptide Cluster 1	Amino acids, peptides, and analogues	IOWJRKAVLALBQB-IWGUZYHVSA-N	C[C@H]([C@@H](C(=O)N[C@@H](CC(=O)O)C(=O)O)N)O	233.07675:2025321 234.0801:229113 235.08346:28114	50.17519:2035 56.27365:1918 61.94677:2068 63.83158:1951 71.0123:25362 71.02343:13308 72.00716:3640 73.03917:83218 74.02319:17927 88.03284:3840 88.0388:88316 100.92423:9591 101.07049:4164 115.00209:92504 115.91866:2587 116.91904:5190 117.06532:64041 117.92709:2570 118.04935:89343 132.02861:4765 145.06026:179673 153.02986:2229 166.6286:2117 171.03967:4597 176.94099:5246 187.93416:1915 188.94145:477…	2657	23183	277528	343556	35046	59777	321834	572964	537698	326343	274812	621536	305681	205996	382995	288618	1389157	175262	51117	419670	495141	718710	762528	885182
Thr-Gln	lvl 2A	9.293	248.125	MS & library MS/MS match	[M+H]+	HILIC+	Peptide Cluster 1	Amino acids, peptides, and analogues	BWUHENPAEMNGQJ-XAHCXIQSSA-N	C[C@H]([C@@H](C(=O)N[C@H](CCC(=O)N)C(=O)O)N)O	248.12465:1309922 249.128:163842 250.13136:0	56.04976:13383 56.57969:1964 62.37083:2173 72.59944:2031 74.06019:201455 78.86584:2167 84.04459:52498 86.53699:2299 101.07114:19330 119.0817:47842 120.06556:3699 129.06593:4336 130.05017:168907 140.07059:3498 140.84634:2250 147.07674:284889 152.8651:2084 170.04506:88965 185.09154:3914 187.07269:2581 195.07692:13510 203.10478:2651 204.16069:2155 213.08775:27047 230.11415:46523 231.09796:58992 248.…	0	0	948132	1475178	149640	156105	414685	1383395	554965	1368043	1392171	5338810	3481407	1040420	1625796	2431687	1774124	332872	139750	381693	1209529	1221498	1204929	1257764
Thr-Gly-Thr	lvl 2A	9.173	278.135	MS & library MS/MS match	[M+H]+	HILIC+	Peptide Cluster 1	Amino acids, peptides, and analogues	KBBRNEDOYWMIJP-UHFFFAOYSA-N	CC(C(C(=O)NCC(=O)NC(C(C)O)C(=O)O)N)O	278.13559:550164 279.13894:108353 280.1423:0	56.04985:3703 74.06025:68570 76.01709:2083 84.04472:3200 96.57047:2529 101.1819:2332 102.05496:4422 103.08732:2197 111.94924:2254 113.07113:4280 115.05034:2316 120.06596:40934 131.08199:38462 159.07697:133652 177.08752:22284 199.07133:15167 216.0986:9972 217.08298:2736 242.11319:2451 259.49329:2080 260.09644:4063 260.12527:72108 278.13629:3795	0	0	142554	182608	20051	22777	127620	211097	94483	87011	98569	883645	490898	81442	266966	192722	26915	39376	0	61552	147576	141685	158861	162952
Thr-His	lvl 2A	9.751	257.125	MS & library MS/MS match	[M+H]+	HILIC+	Peptide Cluster 1	Amino acids, peptides, and analogues	WXVIGTAUZBUDPZ-DTLFHODZSA-N	C[C@H]([C@@H](C(=O)N[C@@H](CC1=CN=CN1)C(=O)O)N)O	257.12512:831416 258.12847:139600 259.13183:32191	58.51599:2080 74.06023:26954 90.59058:1976 91.01166:2223 100.67946:2198 109.36246:2152 110.07161:140053 122.07168:5207 138.06694:5219 150.0668:4842 156.07729:312899 166.06181:13219 166.09827:3623 167.09315:32064 178.0601:2369 193.1087:4028 195.08824:42563 196.07288:12491 198.32599:10205 208.09448:2214 211.1199:10916 213.0985:5368 221.10435:4668 222.08792:12691 239.11455:107284 257.12524:140671	0	5655	831416	403985	23948	37569	198892	527020	170266	233598	375381	1231456	928632	228687	393438	366450	373619	105632	10060	101827	362735	397867	433600	390851
Thr-Leu	lvl 2A	7.766	231.134	MS & library MS/MS match	[M-H]-	HILIC-	Peptide Cluster 1	Amino acids, peptides, and analogues	BQBCIBCLXBKYHW-CSMHCCOUSA-N	C[C@H]([C@@H](C(=O)N[C@@H](CC(C)C)C(=O)O)N)O	231.13393:241841 232.13728:37012 233.14064:0	51.94936:2217 73.03908:12463 90.30457:2193 130.08577:76417 130.09639:3355 143.11755:34915 162.04919:2181 187.10748:170618 231.13408:37631	1722	5880	144221	248522	59869	17765	80525	224587	83180	89159	96351	219123	269289	77461	107820	139360	32476	17896	14510	32829	74120	119926	141086	156371
Thr-Phe	lvl 2A	7.572	267.135	MS & library MS/MS match	[M+H]+	HILIC+	Peptide Cluster 1	Amino acids, peptides, and analogues	IQHUITKNHOKGFC-DVVUODLYSA-N	C[C@H]([C@@H](/C(=N\[C@@H](Cc1ccccc1)C(=O)O)/O)N)O	267.13486:457983 268.13821:33695 269.14157:0	50.81047:2020 52.33905:2084 56.04995:11960 58.06558:3876 65.6231:2039 74.0602:158613 78.40098:1939 84.04477:3449 101.07114:2356 120.08106:45459 166.0867:96606 166.10187:3802 221.12869:20866 249.12459:12900 267.13498:39859	12232	41140	262765	509966	83861	34807	124872	320748	124305	225772	175964	525003	372565	148112	233844	284237	161574	134998	93309	101503	203219	188157	192082	229962
Thr-Thr	lvl 2A	8.936	221.114	MS & library MS/MS match	[M+H]+	HILIC+	Peptide Cluster 1	Amino acids, peptides, and analogues	DSGIVWSDDRDJIO-ZXXMMSQZSA-N	C[C@H]([C@@H](C(=O)N[C@@H]([C@@H](C)O)C(=O)O)N)O	221.11388:2207803 222.11723:166300 223.12059:0	56.04988:60817 57.03395:2356 58.0655:13495 59.03658:1782 61.44949:1849 70.71019:2118 73.93177:2368 73.99668:2446 74.06023:819421 82.82425:2111 84.04475:30381 95.04909:2567 102.05518:47081 112.07646:2459 120.06587:324685 130.05037:43291 130.08665:21090 134.01927:3354 141.1113:2512 142.99638:2989 157.09799:5273 158.08179:9919 159.07683:69597 159.0909:2986 160.42082:2323 175.10876:13939 177.02477:38…	25288	52943	630459	1221307	296612	138770	423495	959156	473337	864271	760986	4349828	2510986	692545	1038164	1375166	486541	402134	93430	468833	816004	800879	784175	811397
Thr-Tyr	lvl 2A	8.108	283.13	MS & library MS/MS match	[M+H]+	HILIC+	Peptide Cluster 1	Amino acids, peptides, and analogues	WCRFXRIWBFRZBR-PPKCKEKNSA-N	CC(C(C(=O)NC(CC1=CC=C(C=C1)O)C(=O)O)N)O	283.1297:490668 284.13305:44949 285.13641:0	51.96034:2163 56.04974:12799 58.06537:9091 59.83807:1875 74.06021:159674 74.74149:2057 76.16817:2104 84.04405:2780 101.07087:2966 107.5976:2116 113.07163:2420 136.0761:32676 165.0551:35922 170.04257:2638 182.08157:100552 191.06041:2869 199.26947:7991 237.12431:24380 265.1188:13541 276.25604:2160 283.12595:57532	0	7860	360891	490668	26731	39846	209381	343154	137959	241020	379415	676527	409004	250191	290281	464031	111150	81514	9092	115418	201197	203973	232016	234291
Thr-Val	lvl 2A	7.908	217.118	MS & library MS/MS match	[M-H]-	HILIC-	Peptide Cluster 1	Amino acids, peptides, and analogues	CKHWEVXPLJBEOZ-VQVTYTSYSA-N	C[C@H]([C@@H](C(=O)N[C@@H](C(C)C)C(=O)O)N)O	217.11809:628790 218.12144:36743 219.1248:0	51.53027:2223 57.19829:1898 73.03925:10169 74.67949:2302 95.25983:2545 116.07007:86285 120.12809:2163 129.10185:43317 130.08548:21312 143.11731:4244 173.09172:213190 187.10748:41052 199.10783:2678 207.17064:2255 217.07985:2084 217.11824:57695	4418	20724	341341	302693	61600	64734	226665	336076	202257	199774	176672	447918	432591	185529	231456	248502	119323	120067	43271	146969	193489	246616	287090	309382
Trp-Gly	lvl 2A	7.623	262.119	MS & library MS/MS match	[M+H]+	HILIC+	Peptide Cluster 1	Amino acids, peptides, and analogues	UYKREHOKELZSPB-JTQLQIEISA-N	C1=CC=C2C(=C1)C(=CN2)C[C@@H](C(=O)NCC(=O)O)N	262.11954:315818 263.12289:67988 264.12625:0	53.36126:2188 65.56293:1980 74.0239:3409 103.13815:2430 105.60198:2301 126.94927:2019 130.06555:13212 132.08124:19075 144.08128:71542 144.09399:2834 159.09233:85483 170.06039:31936 188.07903:2941 203.08217:16534 245.09291:136664 262.11789:11129	0	0	32848	107008	0	0	27476	69445	35765	46289	31576	373315	219557	43556	85111	60346	7433	0	21469	59935	77846	88091	95433	107127
Trp-Leu	lvl 2A	6.167	318.182	MS & library MS/MS match	[M+H]+	HILIC+	Peptide Cluster 1	Amino acids, peptides, and analogues	LYMVXFSTACVOLP-ZFWWWQNUSA-N	CC(C)C[C@@H](C(=O)O)NC(=O)[C@H](CC1=CNC2=CC=CC=C21)N	318.18188:3896930 319.18523:790358 320.18859:79226	51.2301:2286 60.90115:2415 74.02388:17950 75.15863:2575 80.0301:2316 86.09665:64304 98.08875:2351 112.07574:5490 130.06544:100434 130.08632:26409 130.98936:2493 132.0811:157313 141.10283:9744 144.08112:227237 158.08247:2740 159.09204:645236 160.07626:9235 170.06046:123461 172.07686:4581 180.51042:2691 187.08789:11334 188.07095:9370 227.15652:3232 249.18869:2499 255.15044:11262 259.14526:10564 272…	5859	181182	16858004	7976820	301737	812324	2604417	8976952	4400262	4622843	4520873	16165291	8489847	5459400	5729011	9719352	1361451	953068	654397	1531796	5152564	4844611	4514218	4688372
Trp-Val	lvl 2A	6.583	302.15	MS & library MS/MS match	[M-H]-	HILIC-	Peptide Cluster 1	Amino acids, peptides, and analogues	LWFWZRANSFAJDR-JSGCOSHPSA-N	CC(C)C(C(=O)[O-])NC(=O)C(CC1=CNC2=CC=CC=C21)[NH3+]	302.14978:814997 303.15313:171805 304.15649:21361	54.32249:1863 59.45678:1971 73.03895:3694 82.21495:2092 102.79258:2272 116.04928:9181 116.07001:113165 127.08567:13850 129.05615:3198 129.10153:25097 130.06432:30323 157.07626:3381 173.09157:97680 179.67723:2352 185.09105:4162 197.12366:15994 241.13495:3211 258.16016:48799 302.14972:316248	0	26813	511680	340252	30048	48188	176223	459037	293016	280574	358516	687774	628219	354539	463494	517876	247828	145176	58085	200899	324951	445921	484730	524280
Tyr-Asn	lvl 2A	8.765	296.125	MS & library MS/MS match	[M+H]+	HILIC+	Peptide Cluster 1	Amino acids, peptides, and analogues	ONWMQORSVZYVNH-UWVGGRQHSA-N	C1=CC(=CC=C1C[C@@H](C(=O)N[C@@H](CC(=O)N)C(=O)O)N)O	296.12497:884435 297.12832:133073 298.13168:30276	71.15024:2355 75.75212:2185 87.05552:23394 88.03928:3643 91.05441:9843 104.10712:3689 119.04958:25520 133.06125:161094 136.07614:685812 147.04462:23199 176.23511:2197 220.06149:4224 244.16585:2792 262.07187:26653 279.0986:70014 296.06635:2872 296.12494:63893	0	0	643163	1095130	79603	80054	293708	884435	281863	576498	526071	1194872	858552	403856	488845	851712	98754	130433	9777	107176	458357	401496	416954	446915
Tyr-Asp	lvl 2A	8.475	295.092	MS & library MS/MS match	[M-H]-	HILIC-	Peptide Cluster 1	Amino acids, peptides, and analogues	QZOSVNLXLSNHQK-UWVGGRQHSA-N	C1=CC(=CC=C1C[C@@H](C(=O)N[C@@H](CC(=O)O)C(=O)O)N)O	295.0925:283240 296.09585:34458 297.09921:3019	57.79546:2169 71.0124:13906 71.02364:11189 88.03888:14891 107.04915:8833 115.00208:23700 145.06046:3972 159.07707:3267 162.05516:2864 179.08095:44071 180.06528:38456 251.10355:23901 277.0817:2585 295.09238:51542	2345	20064	388147	238592	26395	14952	92998	308728	283240	233956	170098	489559	451544	144521	212347	226710	34547	19161	12773	103685	195843	246235	237721	298376
Tyr-Ile	lvl 2A	6.877	293.15	MS & library MS/MS match	[M-H]-	HILIC-	Peptide Cluster 1	Amino acids, peptides, and analogues	QJKMCQRFHJRIPU-XDTLVQLUSA-N	CC[C@H](C)[C@@H](C(=O)O)NC(=O)[C@H](CC1=CC=C(C=C1)O)N	293.14966:649268 294.15301:121281 295.15637:4031	64.27947:2001 65.10059:1905 76.91635:2090 79.04118:2240 80.13509:2214 82.87793:2100 86.88425:2129 90.09805:2322 106.04076:2408 107.04854:42572 119.04882:3394 130.08569:104570 134.05942:3208 141.1017:40667 143.11754:2507 162.05843:2038 187.10735:37391 232.13234:16874 249.15895:8960 293.14951:316405	44672	44419	620175	693270	144797	92063	217090	612525	374813	398863	382396	807484	752704	339357	578339	631376	348471	162363	109295	219976	315541	407628	497279	580264
Tyr-Val	lvl 2A	7.399	279.134	MS & library MS/MS match	[M-H]-	HILIC-	Peptide Cluster 1	Amino acids, peptides, and analogues	OYOQKMOWUDVWCR-RYUDHWBXSA-N	CC(C)[C@@H](C(=O)O)NC(=O)[C@H](CC1=CC=C(C=C1)O)N	279.13394:877270 280.13729:138461 281.14065:13207	56.24308:2295 68.54465:2115 69.1317:1989 71.30801:2146 75.5928:1975 95.00648:1920 95.29957:2065 106.0406:3620 107.04867:35480 116.0702:60863 127.08607:38787 129.10155:3040 130.83298:1973 173.09192:20533 200.75212:3979 218.11684:9611 232.92371:11668 235.14517:3346 278.83704:2096 279.13391:220514	0	16922	462497	251728	37974	23913	82748	393269	286281	335836	278411	352693	375564	177939	205093	307972	97675	86099	18228	91699	144047	232659	252945	305267
Val-Asp	lvl 2A	8.44	231.097	MS & library MS/MS match	[M-H]-	HILIC-	Peptide Cluster 1	Amino acids, peptides, and analogues	OBTCMSPFOITUIJ-FSPLSTOPSA-N	CC(C)[C@@H](C(=O)N[C@@H](CC(=O)O)C(=O)O)N	231.09749:3154901 232.10084:452813 233.1042:46098	65.43242:2614 71.01222:49193 88.03882:81730 96.99152:3661 99.92413:2687 114.01846:4396 115.00206:167018 115.08606:449280 115.91957:2360 116.07008:177716 116.46619:2250 132.02881:3161 143.11748:37455 169.09657:22281 187.10744:299788 187.93918:2800 195.07632:11972 213.08685:44269 218.05475:2268 231.0976:386175	79809	186607	832009	779080	471686	203723	610934	1123270	1055402	1430295	1058755	2067905	1683240	643882	942945	1050748	869460	221273	84687	679218	1108557	1532778	1468195	1717749
Val-Glu	lvl 2A	8.419	247.13	MS & library MS/MS match	[M+H]+	HILIC+	Peptide Cluster 1	Amino acids, peptides, and analogues	UPJONISHZRADBH-SVRRBLITSA-N	CC(C)[C@@H](C(=O)N[C@H](CCC(=O)O)C(=O)O)N	247.12952:831186 248.13287:123583 249.13623:0	52.06569:2450 54.12067:2181 54.78807:2120 55.05459:24718 56.06798:2331 60.5309:2061 64.14951:1940 69.61139:2157 72.08094:543906 82.60197:2224 84.04468:3855 86.09633:3769 102.05537:12442 124.08728:12701 130.05025:22855 148.06076:183798 201.1241:4681 201.76151:3219 229.11929:3644 235.77184:2117 247.10085:3493 247.12944:92362 247.1568:3670 247.24686:3294	6916	79738	956460	1163122	234064	173670	647801	1299077	454149	1049918	965957	7845803	4498379	615545	818841	1299228	2514062	499274	175659	689964	1005738	1151429	1042722	1176708
Val-His	lvl 2A	9.293	255.146	MS & library MS/MS match	[M+H]+	HILIC+	Peptide Cluster 1	Amino acids, peptides, and analogues	BNQVUHQWZGTIBX-IUCAKERBSA-N	CC(C)[C@@H](C(=O)N[C@@H](CC1=CN=CN1)C(=O)O)N	255.14589:1905838 256.14924:327700 257.1526:0	55.0546:2811 72.081:93044 79.35186:2268 90.97161:2089 95.06003:3503 110.07153:194412 138.06668:2494 156.07719:754609 164.11887:10390 166.0616:47554 193.14563:4553 209.14058:28370 214.49234:2575 220.1096:15675 237.13535:103441 255.14592:283692	0	0	1921345	913990	185614	111582	487929	1195340	565413	882700	699588	3718971	2433067	630459	1340879	959795	505418	91292	115706	386150	967907	1003899	1028859	1077240
Val-Met	lvl 2A	7.385	249.127	MS & library MS/MS match	[M+H]+	HILIC+	Peptide Cluster 1	Amino acids, peptides, and analogues	YSGSDAIMSCVPHG-YUMQZZPRSA-N	CC(C)[C@@H](C(=O)N[C@@H](CCSC)C(=O)O)N	249.12747:1113354 250.13082:169063 251.13418:343031	55.05463:34151 56.04991:3487 61.92492:2262 69.95078:2346 72.08094:703936 74.99117:2258 84.40548:2244 84.99011:2187 87.04455:2139 102.89668:2258 104.05315:30072 104.88422:2015 127.69301:1959 133.03137:19692 134.47987:2171 150.05869:186436 155.11794:16156 181.98775:2497 201.12344:4100 203.12152:12290 249.08673:4562 249.12732:85575 249.1555:3892	0	0	256921	245607	15136	3841	62110	262193	62189	251132	288477	2609270	1113354	98627	170236	250868	266725	23739	5721	50932	218799	232658	230241	226223
Val-Phe	lvl 2A	6.78	265.155	MS & library MS/MS match	[M+H]+	HILIC+	Peptide Cluster 1	Amino acids, peptides, and analogues	GJNDXQBALKCYSZ-NWDGAFQWSA-N	CC(C)[C@H](C(=O)N[C@@H](CC1=CC=CC=C1)C(=O)O)N	265.15549:2613626 266.15884:591890 267.1622:0	55.05466:72134 55.37292:2517 55.85511:1965 57.05762:3233 59.0609:24136 60.11454:2310 60.17553:2331 62.16692:2470 64.22533:2710 72.08099:1500878 73.2019:2393 91.00326:2475 94.21796:2344 98.86206:2735 106.85727:2107 120.08111:113519 124.08774:3328 152.33342:2558 165.11435:9359 166.08676:222868 178.04796:2456 206.1405:17181 207.12416:16883 219.15086:13592 265.1218:12805 265.15527:108439 265.18594:46…	21624	53455	7155763	2506108	423791	278773	1100309	3131835	1486963	2600650	1864774	4966245	3022906	1345784	2014776	2613626	761626	520132	259778	643385	1515212	1819663	1746547	1785975
Ala-Ile-Lys	lvl 2A	9.138	331.235	MS & library MS/MS match	[M+H]+	HILIC+	Peptide Cluster 2	Amino acids, peptides, and analogues	RZZMZYZXNJRPOJ-UHFFFAOYSA-N	CCC(C)C(C(=O)NC(CCCCN)C(=O)O)NC(=O)C(C)N	331.23474:282210 332.23809:44387 333.24145:0	50.66397:2128 52.17182:1917 64.1683:2355 70.85223:1800 84.08089:16170 86.09657:44825 104.01367:2444 115.48086:2196 119.62655:2270 125.39389:2015 129.10248:23943 130.0865:29754 139.07912:2352 147.11317:57495 157.1198:2422 157.13403:57586 185.12849:10475 185.73975:2060 196.78323:2132 227.26703:2196 260.19766:3746 322.28912:2138 331.19348:3174 331.2348:64559	0	19974	204132	137714	253061	40582	90234	108642	16002	66175	99116	316610	270176	48345	61688	114298	105744	125642	0	0	98284	82651	114768	123617
Ala-Lys	lvl 2A	9.781	218.15	MS & library MS/MS match	[M+H]+	HILIC+	Peptide Cluster 2	Amino acids, peptides, and analogues	QXRNAOYBCYVZCD-BQBZGAKWSA-N	C[C@@H](C(=O)N[C@@H](CCCCN)C(=O)O)N	218.15045:2674222 219.1538:371090 220.15716:69542	63.76431:2792 73.07619:2762 76.29602:2347 84.08098:579765 95.04932:5591 101.10765:71222 108.31583:2244 112.07596:2309 129.10252:557277 129.59015:2151 130.08662:292684 143.99995:4659 145.00035:4948 147.11316:505232 155.11841:19829 157.09726:4638 161.02637:3161 162.02676:5355 178.59952:2340 182.32283:2536 183.11351:27931 184.09802:3408 200.1402:69700 201.12387:125312 218.15057:438765	137383	979804	1204650	2326911	1475861	764030	1384385	2376297	860074	866651	1317822	6508240	3985104	1522261	1861792	2113656	1084890	828130	178271	352586	1748732	1774147	1905928	1658472
Arg-Asn	lvl 2A	10.009	289.163	MS & library MS/MS match	[M+H]+	HILIC+	Peptide Cluster 2	Amino acids, peptides, and analogues	JSLGXODUIAFWCF-WDSKDSINSA-N	C(C[C@@H](C(=O)N[C@@H](CC(=O)N)C(=O)O)N)CN=C(N)N	289.16275:2853898 290.1661:401587 291.16946:32403	50.94949:2403 55.19785:2554 60.056:130858 70.06536:402711 87.05562:20940 88.03925:10821 88.07559:14930 97.07611:5260 112.07912:4976 112.08724:110891 113.07091:5142 114.10305:21153 115.08692:34747 116.07076:25119 124.18465:2273 129.1133:3712 130.09755:4107 130.28175:2577 133.06129:30070 140.08212:58319 141.10214:4355 141.11411:4136 149.72258:2417 152.08157:3250 154.09764:4541 157.07249:10711 157.1…	0	72202	1627487	1550162	590108	409973	697071	1251845	438124	475981	400964	2624168	1913851	526656	695858	968302	469422	182795	18320	42084	781107	869866	806469	841537
Arg-Gln	lvl 2A	9.94	303.178	MS & library MS/MS match	[M+H]+	HILIC+	Peptide Cluster 2	Amino acids, peptides, and analogues	PMGDADKJMCOXHX-NKWVEPMBSA-N	C(C[C@@H](C(=O)N[C@@H](CCC(=O)N)C(=O)O)N)CNC(=N)N	303.17856:1332267 304.18191:89004 305.18527:0	60.05597:56273 60.35099:2593 61.51995:2220 62.25062:2200 70.0654:156915 70.06976:5593 84.04462:4210 88.07588:5479 97.07632:5205 98.06022:9665 101.07112:11173 110.07148:3137 112.08732:57740 115.08661:16502 116.07095:15092 117.11714:2377 130.05002:22014 130.09756:3309 132.8194:2281 140.08229:32561 147.07669:64723 154.06133:3393 157.10892:47605 158.09296:39680 175.11952:134068 211.15086:2427 217.184…	0	0	39879	919395	971577	478219	1039477	522124	91849	140287	144064	974960	658239	207683	337093	161087	422802	168746	106725	29730	546416	606332	636186	633209
Arg-Gly	lvl 2A	9.903	232.141	MS & library MS/MS match	[M+H]+	HILIC+	Peptide Cluster 2	Amino acids, peptides, and analogues	XUUXCWCKKCZEAW-YFKPBYRVSA-N	C(C[C@@H](C(=O)NCC(=O)O)N)CN=C(N)N	232.1411:4008133 233.14445:408769 234.14781:158453	52.11726:3447 60.05598:276063 70.06534:717903 71.04918:3130 72.08099:4678 84.45626:2885 97.07644:24085 98.06026:5675 100.05092:63049 112.08717:111518 113.07081:4314 115.08684:52584 116.07094:48108 127.08734:6006 140.08153:22634 141.00085:6479 142.00407:14679 152.08255:5103 155.08182:19209 156.06578:39902 157.10907:46121 158.02795:12327 158.09274:66544 159.03078:23838 169.10918:6934 172.10846:1667…	117780	326601	1804708	1952645	1919180	1288921	2394771	1205150	220055	209641	236186	4008133	2798533	792661	784008	661900	358889	206991	20867	217401	950420	1028580	1097710	1036763
Arg-Leu	lvl 2A	8.823	288.204	MS & library MS/MS match	[M+H]+	HILIC+	Peptide Cluster 2	Amino acids, peptides, and analogues	WYBVBIHNJWOLCJ-DTWKUNHWSA-N	CC(C)C[C@@H](C(=O)O)NC(=O)[C@H](CCCNC(=N)N)N	288.2037:2713703 289.20705:428785 290.21041:0	60.05595:104919 60.59468:2723 65.05881:2305 70.06532:352551 71.04905:2598 72.08088:2948 86.09648:21448 87.09204:3415 88.07594:5020 97.07608:4103 98.05993:8734 104.83192:2176 105.53601:2560 112.0871:75227 115.08678:12112 116.0705:16492 124.3688:2179 132.10266:2684 140.08252:17341 156.11346:11593 157.10867:23574 158.09239:18916 171.07544:2924 175.1194:271902 183.14885:4543 208.14513:5502 210.16014:…	417826	736587	3880826	4154869	7875298	2735091	6351616	5532031	1406247	1910791	931333	2588420	1943138	1518943	1730837	1806874	1711568	818401	315932	606659	2594406	2641149	2783090	2700634
Arg-Met	lvl 2A	9.197	306.16	MS & library MS/MS match	[M+H]+	HILIC+	Peptide Cluster 2	Amino acids, peptides, and analogues	ROWCTNFEMKOIFQ-YUMQZZPRSA-N	CSCC[C@@H](C(=O)O)NC(=O)[C@H](CCCN=C(N)N)N	306.1604:947757 307.16375:92251 308.16711:26858	52.00238:2176 52.30451:2043 60.05601:62958 65.78695:2193 70.06539:195844 87.83842:2034 101.66566:2762 104.05308:17622 112.07915:2328 112.08727:50492 115.08684:12935 116.07044:4356 121.06458:1955 133.03241:4127 140.08197:11482 145.96268:2412 150.05864:4541 150.18037:2230 157.10857:14501 158.09286:18778 163.64273:2080 174.07037:2933 175.11958:129364 184.07982:4646 189.23024:2463 230.08559:3658 243.…	0	0	209830	490027	195097	57939	168115	403228	114383	222669	178820	552286	377214	100540	386537	353959	108728	34703	0	0	206784	181177	178114	205496
Arg-Phe	lvl 2A	8.816	322.188	MS & library MS/MS match	[M+H]+	HILIC+	Peptide Cluster 2	Amino acids, peptides, and analogues	PQBHGSGQZSOLIR-RYUDHWBXSA-N	C1=CC=C(C=C1)C[C@@H](C(=O)O)NC(=O)[C@H](CCCN=C(N)N)N	322.18808:704471 323.19143:110078 324.19479:0	50.80018:2166 60.05595:44656 68.7402:2448 68.97646:2342 70.06531:153976 75.2313:2968 96.62583:2183 97.07594:3396 98.06:2675 112.08702:35056 115.08683:9592 116.07086:9269 120.081:14457 129.73894:2283 140.082:11818 157.10905:19179 158.09248:12025 168.31866:2491 175.1192:95514 188.83939:2417 190.09776:9230 235.71965:2267 242.12886:2453 246.1113:2519 259.1557:3974 262.15552:14906 263.14069:23022 263.…	99125	190010	779240	636479	3312656	971352	1352189	1515537	467876	560630	384263	848564	599767	438502	999582	923810	340981	186339	292662	234135	727003	768572	849843	810825
Arg-Val	lvl 2A	9.275	274.188	MS & library MS/MS match	[M+H]+	HILIC+	Peptide Cluster 2	Amino acids, peptides, and analogues	DAQIJMOLTMGJLO-YUMQZZPRSA-N	CC(C)[C@@H](C(=O)O)NC(=O)[C@H](CCCN=C(N)N)N	274.18829:4824173 275.19164:723619 276.195:39214	52.03913:2486 60.05602:253434 60.38871:2450 69.16665:2587 70.06538:730828 71.04945:5956 71.87373:3003 72.08096:37088 87.09224:3059 88.07604:16816 97.07638:5825 98.06037:17524 112.08726:116670 115.08702:29979 116.07085:25079 118.08711:3219 128.24155:2768 130.09807:6451 140.08263:36312 142.09831:15712 152.10811:3677 157.10912:55080 158.09285:44027 168.15057:12332 169.13385:21826 175.11949:636188 19…	41108	250380	1642570	2791083	1872681	1238146	2585603	3421894	871053	1139885	836820	3117278	2202496	1214595	1262165	1505572	1212398	471395	90133	332617	1846960	1972205	2066181	2007382
Asn-Arg	lvl 2A	9.939	289.163	MS & library MS/MS match	[M+H]+	HILIC+	Peptide Cluster 2	Amino acids, peptides, and analogues	NPDLYUOYAGBHFB-WDSKDSINSA-N	C(C[C@@H](C(=O)O)NC(=O)[C@H](CC(=O)N)N)CN=C(N)N	289.16266:2566844 290.16601:354058 291.16937:306113	52.92822:2137 60.05597:70563 63.08698:2187 63.24591:2587 70.02896:5198 70.06536:126620 70.06971:5417 70.4993:2704 72.08082:5018 82.11497:2199 87.0556:51747 88.0395:59389 88.07596:3159 95.06059:5392 97.07558:2812 97.39059:2443 98.0604:3526 110.07163:3938 112.08722:66142 113.07147:19680 114.10299:9653 115.08691:39846 116.07099:48228 130.09781:12606 133.06126:4250 138.06635:3762 140.04614:9591 140.0…	0	59108	81601	664447	968952	641372	1033864	515136	127984	111757	114275	776085	485444	334279	438205	494654	1007290	490250	57121	12397	605206	620441	689116	675380
Asn-Gln	lvl 2A	9.547	261.12	MS & library MS/MS match	[M+H]+	HILIC+	Peptide Cluster 2	Amino acids, peptides, and analogues	QCWJKJLNCFEVPQ-WHFBIAKZSA-N	C(CC(=O)N)[C@@H](C(=O)O)NC(=O)[C@H](CC(=O)N)N	261.12006:1556125 262.12341:194772 263.12677:0	57.42025:2316 70.02888:23557 83.06025:4983 84.04458:60895 87.05549:59013 88.03938:28461 98.02387:15257 101.07107:15545 115.05024:13215 116.03452:76241 129.06624:19425 130.05006:83732 132.07704:29821 133.06105:82921 136.03957:34330 139.05022:3560 147.07669:95914 153.06619:3547 157.06058:4828 164.03479:30755 167.04524:12296 181.06125:25174 182.04521:27180 184.07239:13474 185.0562:124694 198.08746:4…	0	92166	1360872	2478026	1187088	841743	2887095	1378754	681357	811460	871808	2691483	1967202	722618	1172087	1065302	1851905	644087	142227	487674	1501800	1573476	1524967	1512942
Asp-Arg	lvl 2A	9.971	290.147	MS & library MS/MS match	[M+H]+	HILIC+	Peptide Cluster 2	Amino acids, peptides, and analogues	PSZNHSNIGMJYOZ-WDSKDSINSA-N	C(C[C@@H](C(=O)O)NC(=O)[C@H](CC(=O)O)N)CN=C(N)N	290.14673:2037336 291.15008:1061378 292.15344:122704	60.05599:72035 70.02908:3124 70.06538:132161 72.08082:9475 88.03947:41855 88.0758:2777 91.05367:2388 95.06036:2369 97.07644:3038 98.06042:2189 112.08712:53380 113.07106:13217 114.10284:3243 114.70374:2547 115.08701:28608 116.07086:58432 130.09764:15503 133.06053:3268 140.08218:4099 157.10852:12188 158.05643:50127 158.09274:80487 175.11938:366413 176.10338:3669 187.10999:2454 194.09332:2353 195.07…	0	39449	670705	949644	1068445	1302294	2231896	2044564	116423	102062	174636	2037336	1605844	325395	289890	285637	192347	37470	28339	100605	472278	455573	535919	548178
Gln-Arg	lvl 2A	9.889	303.178	MS & library MS/MS match	[M+H]+	HILIC+	Peptide Cluster 2	Amino acids, peptides, and analogues	OPINTGHFESTVAX-BQBZGAKWSA-N	C(C[C@@H](C(=O)O)NC(=O)[C@H](CCC(=O)N)N)CN=C(N)N	303.17847:990586 304.18182:114674 305.18518:550064	54.05114:2335 60.05587:19269 70.06532:53564 83.06043:9928 84.04451:15158 101.07093:13664 112.07972:2766 112.08732:28174 115.08716:18388 116.07085:43924 128.08199:13307 129.06601:2772 140.08232:4710 147.07654:10312 154.06128:27644 157.10864:20806 158.09254:23719 170.82259:2629 171.08784:3984 175.1194:103157 181.09888:3085 191.08049:2546 209.09364:3954 211.11942:9357 215.11467:4224 224.10394:3134 2…	0	0	23700	88978	990586	190204	281450	185588	0	7098	21134	410984	271981	207683	216085	161087	422802	0	106725	62432	546416	240577	213838	202652
Gln-Glu	lvl 2A	9.325	276.12	MS & library MS/MS match	[M+H]+	HILIC+	Peptide Cluster 2	Amino acids, peptides, and analogues	OWOFCNWTMWOOJJ-NTSWFWBYSA-N	C(CC(=O)N)C(C(=O)NC(CCC(=O)O)C(=O)O)N	276.11969:1035712 277.12304:109049 278.1264:44352	52.702:2350 58.08856:2003 58.86043:2422 60.39606:2040 83.06055:99817 84.04458:229851 101.07127:33107 102.05495:16159 124.09724:2035 125.0195:2044 129.06618:17251 130.05017:103156 132.91582:2450 148.04794:2790 148.06076:72636 167.08147:9233 173.96086:2445 195.07704:22951 196.0611:3045 212.10394:14263 213.08751:24154 214.07079:3365 220.55075:2118 223.07228:8302 240.09917:14233 241.05418:3077 241.06…	5487	93669	1868723	4149052	1943463	827667	1801440	1496273	713632	874660	1125485	10869790	9213735	1418812	1220531	1258732	3541366	445298	137210	333323	1364843	1536429	1405169	1414457
Gln-His	lvl 2A	9.851	284.136	MS & library MS/MS match	[M+H]+	HILIC+	Peptide Cluster 2	Amino acids, peptides, and analogues	JZOYFBPIEHCDFV-YUMQZZPRSA-N	C1=C(NC=N1)C[C@@H](C(=O)O)NC(=O)[C@H](CCC(=O)N)N	284.13617:550250 285.13952:70512 286.14288:0	64.93557:2591 83.06069:4341 84.04478:10180 101.07106:3401 110.07152:83490 129.06609:12698 130.18295:2068 147.07735:4248 156.07733:68511 166.06161:4496 176.08244:11784 204.07761:4425 220.11987:31707 221.10402:41644 226.81418:2112 248.11539:46191 249.09885:75975 249.12576:3328 266.12558:42761 267.10934:65854 267.13953:3242 284.13641:15731	0	0	567117	1025476	575878	170774	387037	560492	106495	333473	676010	9391795	5032467	547861	550250	716064	291758	99704	22334	86878	387712	394017	461070	471466
Gln-Thr	lvl 2A	9.175	248.125	MS & library MS/MS match	[M+H]+	HILIC+	Peptide Cluster 2	Amino acids, peptides, and analogues	HHSJMSCOLJVTCX-ZDLURKLDSA-N	C[C@H]([C@@H](C(=O)O)NC(=O)[C@H](CCC(=O)N)N)O	248.12488:4137438 249.12823:487414 250.13159:44540	56.04995:15330 56.63146:2119 72.75758:2570 74.06025:66037 83.06058:199178 84.04463:245920 85.02964:2473 86.06025:2838 101.0713:96715 102.05518:64755 112.07528:2289 120.06587:501997 122.29037:2657 129.06633:50725 130.05042:49653 133.89124:2919 139.08713:3333 140.07098:69943 147.07674:5809 167.08182:18494 168.06627:16327 169.06108:20970 184.10866:29084 185.09264:65055 185.11105:4246 186.07422:3687 …	0	5927	812947	1638129	1464082	367956	1297996	1656754	375808	664538	965962	8737647	4496362	974141	1383478	1098776	1436406	551520	71954	310925	1308943	1303101	1411910	1427670
Gly-Ile-Lys	lvl 2A	9.181	317.219	MS & library MS/MS match	[M+H]+	HILIC+	Peptide Cluster 2	Amino acids, peptides, and analogues	ITZOBNKQDZEOCE-UHFFFAOYSA-N	CCC(C)C(C(=O)NC(CCCCN)C(=O)O)NC(=O)CN	317.21933:873321 318.22268:104936 319.22604:0	54.3492:1930 63.36288:2001 69.06974:2037 72.08082:12119 75.05551:22700 84.08098:133583 86.09663:46430 99.02042:2416 101.10756:11903 129.10249:153688 130.08658:105228 130.09587:2363 143.11826:203101 146.69464:2286 147.11316:185245 171.11314:23426 183.15025:4355 197.10245:3079 228.17297:3103 260.1976:4205 282.18292:9455 299.20801:2888 306.13663:2458 317.21921:272296	47822	102973	273458	227883	597142	152151	521836	230789	28205	136735	194491	606026	405252	222993	188213	380995	202430	144981	0	18055	268726	244209	278361	295169
Gly-Leu-Lys	lvl 2A	9.025	317.219	MS & library MS/MS match	[M+H]+	HILIC+	Peptide Cluster 2	Amino acids, peptides, and analogues	LLZXNUUIBOALNY-UHFFFAOYSA-N	CC(C)CC(C(=O)NC(CCCCN)C(=O)O)NC(=O)CN	317.2193:480646 318.22265:99346 319.22601:24295	54.35096:2425 83.03432:2157 84.08109:29339 86.09667:39460 101.10723:3309 107.73557:2051 114.18978:2076 129.10258:36062 130.08679:58476 136.29295:1928 143.11836:87746 147.11316:78286 171.11336:14937 198.11662:4617 198.13643:5463 260.19867:8415 263.05963:2594 317.09415:5043 317.17755:4902 317.21906:113190	0	0	100886	252343	480646	63568	94893	215094	21452	103600	135069	559522	457736	124993	80965	203399	31884	0	0	0	189180	193619	199170	234632
Gly-Lys	lvl 2A	9.904	204.135	MS & library MS/MS match	[M+H]+	HILIC+	Peptide Cluster 2	Amino acids, peptides, and analogues	IKAIKUBBJHFNBZ-LURJTMIESA-N	C(CCN)C[C@@H](C(=O)O)NC(=O)CN	204.13492:4180790 205.13827:373453 206.14163:0	54.77897:2163 56.05001:2760 60.05604:2748 68.47216:2218 75.05541:16339 84.04462:15632 84.08102:831049 85.0648:2388 97.02845:2933 98.06104:3450 101.00539:2744 101.10764:84745 102.09148:4452 111.09149:2911 112.07627:3728 114.05479:3543 129.10257:822814 130.08664:403068 139.08696:23669 141.10262:102559 142.0862:3411 147.11319:332567 157.0977:5276 168.1133:5579 169.0977:59107 170.04517:3179 186.08812…	0	32993	807018	1348358	819278	608237	1496418	1502052	370548	445021	509502	4180790	2658701	650944	829994	979051	693983	258797	156953	532840	943226	973490	1044169	1018260
Gly-Pro-Arg	lvl 2A	9.645	329.194	MS & library MS/MS match	[M+H]+	HILIC+	Peptide Cluster 2	Amino acids, peptides, and analogues	JYPCXBJRLBHWME-UHFFFAOYSA-N	C1CC(N(C1)C(=O)CN)C(=O)NC(CCCN=C(N)N)C(=O)O	329.19406:4103893 330.19741:462966 331.20077:0	60.05597:55382 70.06535:215077 72.08118:10153 75.81264:2352 84.08099:5990 92.40089:2868 97.07628:3794 98.98409:3400 100.05074:19742 112.08714:39517 113.07122:10619 114.10282:52422 115.08701:22895 116.07089:67665 127.08692:204576 130.09766:26302 140.082:15514 152.08224:37674 155.08185:85318 157.10843:11852 158.09286:65131 169.10924:10174 172.10786:4706 175.11943:402070 185.10489:5313 195.11284:491…	0	230253	4803834	989170	582892	286939	636940	707973	49865	100197	515637	5252998	4249794	1005864	132581	191211	678786	181808	5872	14612	770899	1126576	769707	870906
Gly-Pro-Lys	lvl 2A	9.691	301.188	MS & library MS/MS match	[M+H]+	HILIC+	Peptide Cluster 2	Amino acids, peptides, and analogues	GAAHQHNCMIAYEX-UHFFFAOYSA-N	C1CC(N(C1)C(=O)CN)C(=O)NC(CCCCN)C(=O)O	301.18793:1934848 302.19128:336125 303.19464:0	65.79713:2281 66.97726:2365 67.42686:2205 70.06535:241021 84.08095:109780 101.10768:22740 117.02604:2253 127.08691:465350 128.07126:17443 129.10254:75109 130.0867:62885 137.07265:3881 141.10223:2889 142.07162:2750 147.11322:122673 155.08191:225191 156.06596:4247 170.43411:2829 173.09285:4563 203.07478:2658 204.13437:4634 226.15596:36259 232.12798:2531 244.16624:102270 265.16638:11167 266.15042:16…	0	10085	849471	1041648	315065	436044	1838890	826054	147924	343741	580469	5972615	3332136	976722	300354	359000	647822	208089	0	81900	658608	763712	790304	705056
Gly-Tyr-Ala	lvl 2A	8.1	308.124	MS & library MS/MS match	[M-H]-	HILIC-	Peptide Cluster 2	Amino acids, peptides, and analogues	UIQGJYUEQDOODF-KWQFWETISA-N	C[C@@H](C(=O)[O-])NC(=O)[C@H](CC1=CC=C(C=C1)O)NC(=O)C[NH3+]	308.1243:167347 309.12765:30734 310.13101:4108		9191	12564	23029	44771	123122	36224	167347	28520	20249	12860	7750	10787	10813	9161	14768	12467	9603	7389	3132	8370	18861	29816	26500	28777
HexCer 44:1;3O|HexCer 20:1;2O/24:0;O	lvl 2A	8.176	856.728	MS & library MS/MS match	[M+H]+	CSH+	Peptide Cluster 2		BTTUHSSNABJERX-BSKJHSHCNA-N	CCCCCCCCCCCCCCCCCCCCCCC(O)C(=O)NC(COC1OC(CO)C(O)C(O)C1O)C(O)\C=C\CCCCCCCCCCCCCCC	856.72754:663309 857.73089:448909 858.73425:138256	78.90506:3521 81.06995:5628 83.08568:3650 94.66951:3216 141.44258:3355 202.55833:4597 244.36726:3989 252.26938:4833 264.26871:36343 280.30121:59408 286.39908:4159 292.30112:249267 310.31192:21137 368.87326:3413 646.65027:15410 658.65143:98141 660.66431:7098 676.66388:44099 838.71783:24885	24890	8622	108493	190914	19510	0	109255	113753	9812	0	18815	167648	161139	75593	90819	81792	0	0	0	0	69504	96201	95538	135796
His-Gln	lvl 2A	9.774	284.136	MS & library MS/MS match	[M+H]+	HILIC+	Peptide Cluster 2	Amino acids, peptides, and analogues	CTCFZNBRZBNKAX-YUMQZZPRSA-N	C1=C(NC=N1)C[C@@H](C(=O)N[C@@H](CCC(=O)N)C(=O)O)N	284.13611:19634848 285.13946:2397050 286.14282:296949	53.94277:16811 75.11298:16108 75.49387:17257 81.51062:16962 83.06034:143683 84.0447:93366 93.04503:99598 101.0711:163990 110.0715:12294840 121.03988:37480 123.0554:24325 129.0663:71198 130.05019:753478 138.06644:711745 147.07669:2134079 155.09302:687282 156.07712:1503370 166.06131:24035 176.0824:111469 194.09389:37677 204.07906:30575 220.12012:94249 221.10382:456674 239.11447:136530 248.11519:279…	0	0	736897	5005706	8075632	1262493	2169240	1267122	325026	444538	1034300	19634848	9597049	1078824	841088	751198	1282379	225521	14758	146275	1590833	1632914	1717646	1656709
His-Glu	lvl 2A	9.732	285.12	MS & library MS/MS match	[M+H]+	HILIC+	Peptide Cluster 2	Amino acids, peptides, and analogues	VHOLZZKNEBBHTH-YUMQZZPRSA-N	C1=C(NC=N1)C[C@@H](C(=O)N[C@@H](CCC(=O)O)C(=O)O)N	285.11993:442117 286.12328:38050 287.12664:0	83.06043:2381 93.04501:3891 110.0715:333832 138.06631:21219 143.44228:2554 156.07715:32584 157.08038:3032 175.75851:2477 194.09262:4044 219.10735:1981 221.10435:4228 239.11417:11541 249.09822:9727 267.10861:32468 285.11923:102264	0	19784	497875	547118	421739	185116	534213	580084	197941	170961	152613	3358140	2694549	315604	457544	238367	296225	16908	129425	241187	488063	491002	520342	466511
His-Ser	lvl 2A	9.794	243.109	MS & library MS/MS match	[M+H]+	HILIC+	Peptide Cluster 2	Amino acids, peptides, and analogues	KRBMQYPTDYSENE-BQBZGAKWSA-N	C1=C(NC=N1)C[C@@H](C(=O)N[C@@H](CO)C(=O)O)N	243.10953:1329580 244.11288:169341 245.11624:0	71.03131:1956 83.06086:8714 84.64088:2139 93.0451:4918 110.07158:795619 112.43285:2154 117.1303:2421 121.11459:1934 128.03214:5373 138.06662:34706 152.08258:5383 156.02679:2643 156.07733:58517 158.74532:2256 179.09256:4359 195.08812:4314 197.10396:12499 198.18588:3845 198.21992:2075 209.1001:2136 212.86552:2304 218.49663:2165 225.09883:159671 226.08374:2403 243.06264:41233 243.10942:189206	0	22465	993118	2166276	422105	312147	1338073	1395549	459292	698868	1086809	13859320	8628546	1218943	1113418	1346305	771954	445148	38860	296233	1282196	1471105	1422231	1463180
Ile-Ala-Lys	lvl 2A	9.341	331.235	MS & library MS/MS match	[M+H]+	HILIC+	Peptide Cluster 2	Amino acids, peptides, and analogues	RWIKBYVJQAJYDP-UHFFFAOYSA-N	CCC(C)C(C(=O)NC(C)C(=O)NC(CCCCN)C(=O)O)N	331.23474:1891414 332.23809:405005 333.24145:35925	58.59867:2491 69.07005:11078 70.06556:5209 72.08096:4010 84.08102:143256 86.09665:322329 92.5371:2340 101.10757:30973 106.10133:2860 111.82128:2655 129.10258:242085 130.08667:214810 147.11322:454865 155.11826:3344 157.09787:3677 157.13405:123762 175.11955:11941 183.11317:5414 185.129:80125 200.14:51392 201.12355:17490 218.15062:388876 228.13547:3481 314.25949:2624 331.23593:570940	0	10554	269957	57551	202397	4572	9744	134690	22922	7104	0	194598	69514	17586	67126	114090	0	0	0	0	127174	128356	104552	126939
Ile-Pro-Arg	lvl 2A	8.796	385.257	MS & library MS/MS match	[M+H]+	HILIC+	Peptide Cluster 2	Amino acids, peptides, and analogues	SVZFKLBRCYCIIY-UHFFFAOYSA-N	CCC(C)C(C(=O)N1CCCC1C(=O)NC(CCCN=C(N)N)C(=O)O)N	385.25684:2300722 386.26019:475428 387.26355:0	54.51867:2654 55.78608:2490 60.05597:64797 61.32034:2741 69.91829:2307 70.06533:235124 72.08083:11585 84.0812:3079 86.09662:48871 91.45403:2605 97.07619:3035 98.06037:11259 112.08716:31018 113.0712:5924 114.1028:35939 115.08669:28963 116.07104:49712 126.05515:5183 130.09818:23449 137.93314:2466 140.08194:37843 157.10893:19941 158.09273:62575 175.11943:502889 183.1501:39165 185.1032:4333 193.1346:…	13000	100603	1209726	1137518	250395	301963	732481	748242	242798	289380	301242	2300722	1143936	355426	171080	451109	223897	77243	7777	47221	480918	574263	590336	537126
Leu-Leu-Arg	lvl 2A	8.488	401.288	MS & library MS/MS match	[M+H]+	HILIC+	Peptide Cluster 2	Amino acids, peptides, and analogues	DSFYPIUSAMSERP-UHFFFAOYSA-N	CC(C)CC(C(=O)NC(CC(C)C)C(=O)NC(CCCN=C(N)N)C(=O)O)N	401.28809:1958532 402.29144:485215 403.2948:27514	60.05593:33214 69.07008:4147 70.06538:41003 72.08083:4097 86.09662:286757 112.08694:18887 113.07109:3003 114.1027:3505 115.08702:16554 116.07111:39470 130.09778:14583 133.09755:5011 136.27283:3432 137.73445:2339 154.56325:2786 156.11351:41235 157.10851:5051 158.09293:52569 163.03969:3036 164.30553:2288 168.92155:2449 175.11945:312227 199.18109:128708 215.13971:5723 227.17615:38286 228.17152:4339 …	0	151946	466599	141295	532549	159874	378601	211258	13917	10879	0	329690	159148	106686	236603	318004	16125	6254	0	11010	208827	190343	226207	281591
Leu-Lys	lvl 2A	9.073	260.198	MS & library MS/MS match	[M+H]+	HILIC+	Peptide Cluster 2	Amino acids, peptides, and analogues	OTXBNHIUIHNGAO-UWVGGRQHSA-N	CC(C)C[C@@H](C(=O)N[C@@H](CCCCN)C(=O)O)N	260.19763:5515588 261.20098:690029 262.20434:0	67.30138:2675 70.06541:31771 79.12254:2339 84.081:452425 86.09661:511855 101.10757:67842 123.99446:2290 127.08679:5628 129.10254:617537 130.08662:436111 137.3661:2618 147.11319:891988 157.09807:5221 185.01907:2369 185.09261:2663 197.16492:24036 225.16032:26647 242.18692:98315 242.21356:5094 243.17145:61418 260.19763:697703	0	77636	507163	536717	709763	332258	841643	801032	137854	212877	248151	1105115	657755	377594	354688	403151	626013	346075	380472	333313	1121257	1139639	1170130	1211738
Lys-Ala	lvl 2A	9.739	218.151	MS & library MS/MS match	[M+H]+	HILIC+	Peptide Cluster 2	Amino acids, peptides, and analogues	QOOWRKBDDXQRHC-BQBZGAKWSA-N	C[C@@H](C(=O)O)NC(=O)[C@H](CCCCN)N	218.15038:1457343 219.15373:153508 220.15709:0	57.07031:2363 66.88723:1961 84.08098:750769 87.13031:2237 95.04922:3504 101.10757:36329 112.07622:3709 129.10254:124630 130.08676:13646 133.13661:2147 142.3448:2562 143.99858:7028 144.99722:4730 147.11325:45408 160.0233:2429 161.02721:3785 162.02562:3615 183.11322:9680 184.09778:9317 200.13988:16766 201.12389:164909 211.42122:2193 218.15057:246205	643136	979804	1290965	2326911	1475861	764030	1384385	2376297	860074	945193	1317822	5346746	4962570	1435302	1861792	1797372	786374	234153	131355	352586	1748732	1774147	1905928	1658472
Lys-Asn	lvl 2A	9.997	261.157	MS & library MS/MS match	[M+H]+	HILIC+	Peptide Cluster 2	Amino acids, peptides, and analogues	JPNRPAJITHRXRH-BQBZGAKWSA-N	C(CCN)C[C@@H](C(=O)N[C@@H](CC(=O)N)C(=O)O)N	261.15659:2467541 262.15994:984896 263.1633:62563	54.47411:2221 60.93787:2107 64.29076:2284 67.13638:2356 84.08099:693729 87.05567:11694 88.03961:3797 97.91157:2321 101.10761:73101 102.09142:4943 111.09187:3234 112.07597:3975 129.10257:343152 130.08658:26953 133.06133:20703 139.08717:2823 147.11299:60202 157.09749:9973 184.10867:15267 196.09448:2263 198.12566:2934 203.55396:2697 204.62492:2635 208.10854:3412 209.09264:48504 226.11952:49613 227.1…	0	55471	1783158	2467541	859946	596009	1384332	1942282	378861	910224	1284965	5281663	3352940	1333506	1022339	2096808	1061439	270683	35142	147573	1114387	1203943	1163899	1258875
Lys-Gln	lvl 2A	9.935	275.172	MS & library MS/MS match	[M+H]+	HILIC+	Peptide Cluster 2	Amino acids, peptides, and analogues	OAPNERBWQWUPTI-YUMQZZPRSA-N	C(CCN)C[C@@H](C(=O)N[C@@H](CCC(=O)N)C(=O)O)N	275.17212:981225 276.17547:257009 277.17883:22088	59.23317:2309 60.54773:2247 83.06052:4496 84.04485:10178 84.08101:441215 98.38663:2262 101.07117:10738 101.10754:54010 102.0919:3144 112.07622:3627 129.06621:9005 129.10262:197537 130.05032:26816 130.08665:10198 147.07697:71372 147.11316:20880 157.09735:2781 222.12451:2741 239.15115:13785 240.13597:20175 241.11929:9525 246.3979:2458 257.16211:25168 258.14575:86533 275.17215:224596 275.27737:9852	0	13075	689473	1311919	1030544	719207	916724	1141905	227479	349222	415110	3262408	2279380	507394	904561	781953	937257	158752	28895	76909	673179	725183	824678	806933
Lys-Glu	lvl 2A	9.918	276.156	MS & library MS/MS match	[M+H]+	HILIC+	Peptide Cluster 2	Amino acids, peptides, and analogues	UGTZHPSKYRIGRJ-YUMQZZPRSA-N	C(CCN)C[C@@H](C(=O)N[C@@H](CCC(=O)O)C(=O)O)N	276.15628:1085356 277.15963:150600 278.16299:0	58.348:2159 60.05571:9575 70.0651:14316 74.05981:3456 83.5879:2030 84.04457:4089 84.08104:283315 96.7967:2083 101.10748:17602 102.05487:4035 112.07579:2600 116.07048:2921 129.10258:83415 130.08682:14828 147.11342:22555 148.06013:2687 158.09245:3854 175.11955:23622 197.43671:2250 240.13286:3896 240.43541:2322 250.90565:2288 258.14514:23236 259.12857:40794 276.15884:148037	7049	23247	764679	1085356	679779	411766	680975	738988	241014	306159	335540	2281615	2256898	386660	449425	565508	1986628	256292	134160	278525	536114	548511	610516	576437
Lys-Ile	lvl 2A	8.975	260.198	MS & library MS/MS match	[M+H]+	HILIC+	Peptide Cluster 2	Amino acids, peptides, and analogues	FMIIKPHLJKUXGE-GUBZILKMSA-N	CC[C@H](C)[C@@H](C(=O)O)NC(=O)[C@H](CCCCN)N	260.19785:4401926 261.2012:824622 262.20456:75841	52.76804:3100 56.05007:4579 57.04132:3447 57.95804:3120 59.15449:3129 67.05466:5058 70.06538:54099 73.46937:3242 84.08102:2168518 85.06528:6529 86.09657:55746 101.10764:144651 102.09155:20402 106.8242:3592 112.07586:15626 127.08708:5286 129.10262:518966 130.08664:80543 132.10248:20063 147.11327:365775 155.08113:4448 167.98036:11715 195.25272:3494 197.16563:42578 198.976:7094 214.19287:6515 224.17…	0	92117	2542165	2812386	1221612	902544	2202058	2450714	428098	812810	672265	2285312	1692048	902493	752205	1249758	832956	529065	94350	371616	1548036	1637048	1587466	1643632
Lys-Leu	lvl 2A	8.882	260.198	MS & library MS/MS match	[M+H]+	HILIC+	Peptide Cluster 2	Amino acids, peptides, and analogues	ATIPDCIQTUXABX-UWVGGRQHSA-N	CC(C)C[C@@H](C(=O)O)NC(=O)[C@H](CCCCN)N	260.19763:2185448 261.20098:296484 262.20434:0	59.11445:2432 62.59446:2439 65.7729:2180 67.05463:3241 71.03586:2345 72.89433:2724 84.08099:1146227 86.09664:24102 101.10769:74626 102.09188:8486 104.10723:9788 112.07563:9959 129.10255:264486 130.08678:33222 131.55006:2526 132.10283:4721 147.11308:146070 181.57603:2136 197.16573:14480 214.1918:3012 216.98322:2392 225.16029:3804 226.14478:8536 242.18642:17597 243.17099:222614 260.19763:601841	178909	397520	8821425	6613064	3335955	1955998	3907034	6919284	2885253	3490953	2523295	11432273	6702716	3495778	3433339	5583760	2803594	1643022	824349	1047192	3763206	4296694	4104959	4104253
Lys-Val	lvl 2A	9.311	246.182	MS & library MS/MS match	[M+H]+	HILIC+	Peptide Cluster 2	Amino acids, peptides, and analogues	YQAIUOWPSUOINN-IUCAKERBSA-N	CC(C)[C@@H](C(=O)O)NC(=O)[C@H](CCCCN)N	246.18193:3135605 247.18528:445992 248.18864:0	52.89052:2503 53.81359:2311 56.04983:2760 62.09255:2141 72.08092:15022 83.59607:2095 84.08095:923317 85.06556:2260 101.10748:55648 102.09135:3381 112.07622:4168 118.0862:3463 129.10251:189397 130.08662:28011 147.09988:4753 147.1131:127636 156.50978:2396 183.14996:12128 200.17601:3019 211.14514:3031 212.1293:9398 228.17178:5342 229.15521:176099 246.18178:377546	79748	311788	1785355	3226297	1824951	932578	1790252	4224230	1690041	2017987	1659668	10352375	6929942	2662235	3070231	4297871	1564211	456605	211291	720624	2963782	2991084	2895960	3054955
Met-Arg	lvl 2A	9.256	306.16	MS & library MS/MS match	[M+H]+	HILIC+	Peptide Cluster 2	Amino acids, peptides, and analogues	UASDAHIAHBRZQV-YUMQZZPRSA-N	CSCC[C@@H](C(=O)N[C@@H](CCCN=C(N)N)C(=O)O)N	306.16025:421912 307.1636:39007 308.16696:0	56.04979:11605 59.84711:2102 60.05591:13726 61.01092:2713 70.06534:27448 83.47487:2008 86.09647:3805 104.05312:46543 112.08723:9361 115.08716:4914 116.07117:9125 130.09805:4019 131.08185:5130 148.06027:3869 157.10904:2636 158.0925:20662 174.07018:17701 175.10283:4052 175.1194:88599 189.0876:4654 197.97775:9259 246.12753:3894 247.11205:4268 271.12247:8111 289.13367:25230 306.16028:250185	0	0	84774	152094	421912	66670	73170	213005	15806	89682	43224	515514	434194	12369	80416	106349	7594	13157	0	0	99527	102199	95455	99562
Met-Gly	lvl 2A	7.975	207.08	MS & library MS/MS match	[M+H]+	HILIC+	Peptide Cluster 2	Amino acids, peptides, and analogues	QXOHLNCNYLGICT-YFKPBYRVSA-N	CSCC[C@@H](C(=O)NCC(=O)O)N	207.08046:1027699 208.08381:50753 209.08717:182566	56.04988:138658 58.82536:2175 60.27098:2202 61.01098:42492 66.18166:1911 74.06023:34110 79.257:1864 80.23334:2083 85.0399:3587 93.51424:2603 99.88742:2439 104.05309:475461 109.80748:2572 113.03489:3083 113.07133:3314 131.04576:13807 142.05049:11462 155.13687:2024 159.06181:3605 159.07681:104217 165.11433:3426 190.0537:8757 198.2789:9802 207.06009:6362 207.08064:26815 207.11417:2339 207.175:2650	0	0	323298	801676	612586	313610	341583	434191	108135	281894	275097	1027699	616246	139500	127769	311392	82323	19865	0	0	169856	179242	185042	175638
Phe-Arg	lvl 2A	8.878	322.188	MS & library MS/MS match	[M+H]+	HILIC+	Peptide Cluster 2	Amino acids, peptides, and analogues	OZILORBBPKKGRI-RYUDHWBXSA-N	C1=CC=C(C=C1)C[C@@H](C(=O)N[C@@H](CCCN=C(N)N)C(=O)O)N	322.18826:8036496 323.19161:1396994 324.19497:64289	58.23765:4924 60.05601:231975 62.65717:3721 63.60028:4541 66.372:4505 70.06536:449355 72.08104:27087 72.83377:4221 74.7374:3825 91.05434:4286 95.55685:3865 96.0969:4272 97.07595:9135 98.0609:5356 98.38747:4460 100.08708:5062 112.0873:135050 112.77727:4017 113.07112:27099 114.10285:29588 115.08689:110008 116.07093:177367 120.08114:1007157 130.09766:51678 131.12975:6816 133.09729:20192 138.06677:45…	49781	284739	413844	278002	2547863	1055170	1123850	396824	196691	174451	139814	848564	245218	143056	377969	247234	136115	157294	135331	74078	605338	664515	624261	637359
Phe-Gly	lvl 2A	7.666	221.092	MS & library MS/MS match	[M-H]-	HILIC-	Peptide Cluster 2	Amino acids, peptides, and analogues	GLUBLISJVJFHQS-VIFPVBQESA-N	C1=CC=C(C=C1)C[C@@H](C(=O)NCC(=O)O)N	221.09189:446013 222.09524:80348 223.0986:0	51.51323:2196 53.3681:2166 56.23156:1689 74.02319:59911 74.62368:2578 83.02314:2905 85.03914:77870 89.45553:1948 91.05363:19447 107.44673:2016 119.68629:2069 139.52832:1799 142.23389:2049 148.98959:13590 156.3418:1943 160.07536:11705 178.29655:2208 221.09187:114830	0	10926	194274	203385	70256	43858	190988	70965	47510	43049	29181	141426	118495	39379	47598	39077	24906	37379	19440	27195	67271	128374	145853	142937
Ser-Arg	lvl 2A	9.944	262.152	MS & library MS/MS match	[M+H]+	HILIC+	Peptide Cluster 2	Amino acids, peptides, and analogues	RZEQTVHJZCIUBT-WDSKDSINSA-N	C(C[C@@H](C(=O)O)NC(=O)[C@H](CO)N)CN=C(N)N	262.15192:1278196 263.15527:98591 264.15863:0	60.04474:34831 60.05594:31578 62.6136:1988 65.71586:2095 70.06535:57655 72.08109:8120 84.08081:10381 100.05102:4217 107.74442:2205 110.03178:4592 111.59224:1990 112.08749:23368 113.07083:3618 114.10297:3171 115.08699:29089 116.07088:37731 130.06129:47909 147.11287:3758 157.10887:4897 158.09294:65039 171.32123:2520 175.11955:112985 185.09291:3456 202.11975:8901 203.10378:17983 227.11485:22948 228.…	5892	190586	1828143	2404988	4547938	1413265	1877106	1717720	382050	802779	1132102	4689486	3443074	1303895	1105633	1892180	923087	403515	102972	161529	1244319	1321367	1381462	1312258
Ser-Ile-Lys	lvl 2A	9.237	347.23	MS & library MS/MS match	[M+H]+	HILIC+	Peptide Cluster 2	Amino acids, peptides, and analogues	JIPVNVNKXJLFJF-UHFFFAOYSA-N	CCC(C)C(C(=O)NC(CCCCN)C(=O)O)NC(=O)C(CO)N	347.23004:855948 348.23339:190220 349.23675:0	52.81519:2704 54.55684:2104 60.04464:9749 62.65446:2070 70.32939:2203 81.09342:2581 84.08106:82108 86.0968:54737 87.05538:17388 101.10751:5750 112.19205:2253 128.10713:4817 129.1026:101599 130.08673:105074 147.11324:213065 171.14989:2388 173.12909:242168 201.12386:29222 222.73907:2472 242.18565:3883 260.19806:23072 260.56534:2578 329.21851:3254 347.02386:3371 347.22995:302017	0	6727	776165	326174	855948	57419	166916	404288	94071	114820	89658	746310	491031	181080	221383	353934	10069	0	5789	0	167292	150234	151031	160104
Ser-Lys	lvl 2A	9.969	234.146	MS & library MS/MS match	[M+H]+	HILIC+	Peptide Cluster 2	Amino acids, peptides, and analogues	SBMNPABNWKXNBJ-BQBZGAKWSA-N	C(CCN)C[C@@H](C(=O)O)NC(=O)[C@H](CO)N	234.14543:1224209 235.14878:156880 236.15214:0	59.19365:2046 60.04473:52192 62.04197:2276 62.23138:2318 70.77619:2041 84.081:288770 88.02129:2516 100.41605:2341 101.10762:44137 102.09139:4510 106.3858:2144 107.9958:2121 111.09251:2152 117.0424:2062 129.10252:225278 130.08662:97761 138.26045:2043 147.11316:139018 164.68121:2286 164.84752:2326 171.11322:17227 198.12431:11396 199.1071:18277 216.13492:46450 217.11908:29704 232.13678:2261 234.1455…	0	138135	4226294	1674872	526920	422377	1008888	1503519	446213	758049	679801	3974226	2272578	926784	904019	1243080	1224209	351717	107550	209212	876945	909197	933822	1082420
Trp-Pro	lvl 2A	7.001	302.151	MS & library MS/MS match	[M+H]+	HILIC+	Peptide Cluster 2	Amino acids, peptides, and analogues	DXYQIGZZWYBXSD-JSGCOSHPSA-N	C1C[C@H](N(C1)C(=O)[C@H](CC2=CNC3=CC=CC=C32)N)C(=O)O	302.15082:1619002 303.15417:350711 304.15753:0	61.99785:2105 70.06541:72705 86.09677:20806 114.05534:97661 116.07087:96589 125.07133:10740 130.06564:45243 132.08118:86413 135.21011:2237 140.03491:3176 144.08115:65137 159.09218:452574 160.07602:3180 165.27814:3082 170.06046:104233 171.07681:29426 172.07646:20492 188.07097:3073 189.12494:2788 196.57706:2643 199.18117:5395 227.17551:2816 239.11836:5290 242.59833:2270 243.11392:3162 257.12891:297…	0	0	366229	325068	93760	160880	328904	130633	28708	122069	163437	2433205	984788	229027	139807	181778	6256	15068	0	87159	348536	360820	376770	418509
Trp-Thr	lvl 2A	7.642	304.129	MS & library MS/MS match	[M-H]-	HILIC-	Peptide Cluster 2	Amino acids, peptides, and analogues	YBRHKUNWEYBZGT-WLTAIBSBSA-N	C[C@H]([C@@H](C(=O)O)NC(=O)[C@H](CC1=CNC2=CC=CC=C21)N)O	304.12924:188619 305.13259:35866 306.13595:0	74.02307:8545 85.03895:3073 85.30022:2042 113.10481:2073 130.06479:3215 131.04428:23445 135.7827:2217 201.27492:1980 216.11349:2879 260.10309:61672 271.96201:2255 304.12894:14102	0	910	42834	86400	50660	13362	46726	32460	23908	32934	31347	57100	65560	16351	25387	35410	2828	7664	1378	14173	21342	35452	48350	49312
Tyr-Gln	lvl 2A	8.602	310.141	MS & library MS/MS match	[M+H]+	HILIC+	Peptide Cluster 2	Amino acids, peptides, and analogues	UBAQSAUDKMIEQZ-QWRGUYRKSA-N	C1=CC(=CC=C1C[C@@H](C(=O)N[C@@H](CCC(=O)N)C(=O)O)N)O	310.1405:522684 311.14385:167416 312.14721:0	52.07937:1977 56.94924:2055 84.04442:16917 91.05455:2916 101.07109:7864 107.04915:10610 109.42299:1848 112.99395:2029 119.05022:8032 130.05022:90482 136.0761:225303 138.25609:2449 147.04539:18300 147.07678:207040 166.99579:2156 173.40103:2176 181.0976:10960 187.38983:2209 275.10504:2548 276.08707:20990 293.11426:18504 310.14066:70414	0	0	89871	572253	368955	142551	280483	403550	148347	141242	131805	456336	346852	141531	285902	224351	280357	63888	61130	78700	259496	268872	248654	299229
Val-Gln	lvl 2A	8.553	246.146	MS & library MS/MS match	[M+H]+	HILIC+	Peptide Cluster 2	Amino acids, peptides, and analogues	XXDVDTMEVBYRPK-SVRRBLITSA-N	CC(C)[C@@H](C(=O)N[C@H](CCC(=O)N)C(=O)O)N	246.14542:3526903 247.14877:445018 248.15213:40081	53.87503:2221 54.60036:2111 55.05462:35163 72.08094:795739 79.90131:2512 83.00893:2708 83.04957:8867 84.04458:45879 101.07125:40135 112.02601:3069 117.10244:48556 130.05019:559519 143.03189:3512 147.07675:1455100 183.1131:3306 201.12338:3072 211.10883:12170 212.09206:3825 228.09799:4132 228.13507:19649 229.11897:81383 244.94812:2894 246.11217:21894 246.14531:380553 246.24358:11405	0	109092	1641510	5175838	1833743	377707	946413	7604966	1298638	2143083	1987140	18848630	10961175	2472403	3489132	4216386	570701	299523	198945	702865	2697396	2730698	3054056	3155387
Val-Lys	lvl 2A	9.458	246.182	MS & library MS/MS match	[M+H]+	HILIC+	Peptide Cluster 2	Amino acids, peptides, and analogues	JKHXYJKMNSSFFL-IUCAKERBSA-N	CC(C)[C@@H](C(=O)N[C@@H](CCCCN)C(=O)O)N	246.18207:1559626 247.18542:228223 248.18878:0	55.05473:15341 56.05026:2566 69.79479:2166 72.08099:264076 84.081:157327 101.10746:23159 129.1026:276162 130.08665:196610 145.06122:8509 147.11324:466815 154.04971:3702 171.07629:3497 183.15039:11070 192.24541:2453 211.14517:9765 228.17154:47119 229.15565:22540 246.18207:340316	0	159517	1559626	1233715	502867	393216	783647	1056261	342611	708752	740942	1596856	1244826	821189	760585	1047870	675994	439808	232559	432832	759476	803568	858774	813648
Ala-Glu	lvl 2A	8.99	217.082	MS & library MS/MS match	[M-H]-	HILIC-	Peptides and Ceramide Cluster	Amino acids, peptides, and analogues	VYZAGTDAHUIRQA-WHFBIAKZSA-N	C[C@@H](C(=O)N[C@@H](CCC(=O)O)C(=O)O)N	217.08168:1302834 218.08503:147019 219.08839:266993	62.66083:1879 72.7248:2168 84.04401:3951 87.05479:57419 88.03877:294342 100.03889:4128 102.0544:32002 102.83973:2095 112.07509:11937 113.07052:4409 124.61356:2933 128.03365:97203 129.10178:87917 137.07065:5013 140.1217:2337 146.04425:2184 155.08099:39023 157.86743:2238 173.09177:160515 199.07117:121938 201.9124:2675 217.08183:184653	40226	140553	2576672	1104403	181719	297381	1020852	1183725	1551785	1062092	529086	1182941	767587	407315	1222444	854537	813974	262713	208707	699187	957559	1601579	1673114	1887842
Ala-Ser	lvl 2A	9.153	175.071	MS & library MS/MS match	[M-H]-	HILIC-	Peptides and Ceramide Cluster	Amino acids, peptides, and analogues	IPWKGIFRRBGCJO-IMJSIDKUSA-N	C[C@@H](C(=O)N[C@@H](CO)C(=O)O)N	175.07086:5747358 176.07421:508367 177.07757:53110	53.08446:2454 54.63722:3139 58.02805:14608 60.99133:6057 62.38751:2602 62.53846:2829 62.69543:2522 74.02313:100162 84.0436:15509 85.03922:3158 86.05959:5628 87.05453:14267 88.03869:27027 91.10491:3280 97.03896:5343 99.05467:27274 101.07037:183350 104.03394:3195 111.05499:5315 113.07036:165552 118.96474:5295 127.04975:32678 129.84579:2955 131.0444:34368 133.15564:3037 145.06017:676523 146.9595:444…	25299	152749	3436600	1574094	121588	393119	659031	1565213	2485549	2490418	1508140	1642201	903960	715897	1650483	1772826	505558	528154	864963	1981742	1299931	1587860	1597420	1798094
Asn-Asp	lvl 2A	9.516	246.072	MS & library MS/MS match	[M-H]-	HILIC-	Peptides and Ceramide Cluster	Amino acids, peptides, and analogues	HZYFHQOWCFUSOV-IMJSIDKUSA-N	C([C@@H](C(=O)N[C@@H](CC(=O)O)C(=O)O)N)C(=O)N	246.07213:435692 247.07548:36504 248.07884:4970	71.01218:13278 71.02337:8680 79.71011:1916 88.03887:31939 110.11448:2143 113.03416:36945 114.01801:2461 115.00208:34157 130.0607:45884 131.04472:32432 132.02826:13041 166.40407:2236 168.02882:2189 185.0556:11853 201.84933:2417 202.08278:3355 228.06163:3644 229.04572:3708 232.68781:2189 246.07242:48434	46583	129836	330242	114035	48514	77210	213844	170014	171061	122346	95921	143973	99471	71970	127775	139833	54970	27826	27821	192364	199518	243149	267039	302087
Asp-Asp	lvl 2A	9.711	247.056	MS & library MS/MS match	[M-H]-	HILIC-	Peptides and Ceramide Cluster	Amino acids, peptides, and analogues	FRYULLIZUDQONW-IMJSIDKUSA-N	C([C@@H](C(=O)N[C@@H](CC(=O)O)C(=O)O)N)C(=O)O	247.05612:724942 248.05947:68496 249.06283:32848	50.80403:1862 70.02834:2930 71.01231:17175 73.56817:2257 88.03881:33384 96.00754:13711 99.38731:1935 101.83044:2054 107.19158:2158 113.034:164495 114.01844:3523 115.00207:57038 115.19653:2434 120.2669:2108 131.04446:19395 132.02855:106442 141.0654:9055 168.02875:15246 185.05515:22669 191.95354:2647 198.81436:9708 229.04539:55627 247.0555:2320	13187	63149	132571	78751	10781	36215	71712	141425	102090	61705	25324	43450	47821	45553	100509	69033	235456	11776	3678	42763	96276	129944	152904	142135
Asp-Gln	lvl 2A	9.714	260.088	MS & library MS/MS match	[M-H]-	HILIC-	Peptides and Ceramide Cluster	Amino acids, peptides, and analogues	GSMPSRPMQQDRIB-WHFBIAKZSA-N	C(CC(=O)N)[C@@H](C(=O)O)NC(=O)[C@H](CC(=O)O)N	260.08783:353415 261.09118:29210 262.09454:0	52.58515:2240 56.80956:2042 58.04979:1775 84.04393:3858 96.00742:23270 101.07038:3122 113.03403:49518 115.0018:2696 127.0498:11369 128.03395:10371 131.04501:2711 145.06021:47224 180.07658:2589 189.82405:2858 225.05125:2049 242.0766:37594 260.0882:3311	2427	16068	323999	99783	17271	29505	136740	140847	145676	130942	97796	98272	95633	50958	96084	82932	315025	100506	31622	103388	136262	169252	177687	203697
Asp-Tyr	lvl 2A	8.807	295.092	MS & library MS/MS match	[M-H]-	HILIC-	Peptides and Ceramide Cluster	Amino acids, peptides, and analogues	NALWOULWGHTVDA-UWVGGRQHSA-N	C1=CC(=CC=C1C[C@@H](C(=O)O)NC(=O)[C@H](CC(=O)O)N)O	295.09244:256101 296.09579:14605 297.09915:0	55.3259:1913 64.06166:2180 64.39904:2074 84.08144:1941 86.26202:2344 88.20512:1993 88.26133:2218 90.79093:2007 93.88697:2268 99.48132:2110 110.02322:2744 113.03415:13686 115.00212:4152 119.04802:3051 126.04204:4393 127.04986:8612 136.60509:2483 163.03882:2856 165.36642:2349 180.06474:41048 180.97758:2467 191.08159:13606 195.5257:2487 198.65462:3824 198.67606:4147 216.06586:10446 233.09216:8686 26…	0	7205	100849	55792	0	9342	36030	57484	108209	69083	38341	79067	277906	24433	86537	42229	103298	28254	29577	76437	51770	64935	67112	78228
Ceramide 32:1;2O|Ceramide 16:1;2O/16:0	lvl 2A	5.045	510.49	MS & library MS/MS match	[M+H]+	CSH+	Peptides and Ceramide Cluster		PIVKMDKERPTVGC-IMVLJIQENA-N	CCCCCCCCCCCCCCCC(=O)NC(CO)C(O)\C=C\CCCCCCCCCCC	510.49008:2002873 511.49343:831954 512.49679:105885	75.42495:2459 78.12809:2815 81.07004:2972 82.06543:6016 83.0859:4280 95.08608:2627 117.31078:2665 196.70938:5733 196.73213:15115 224.23901:24904 236.2382:278292 252.26788:3735 254.24905:36344 264.26932:60668 275.21332:2605 282.13705:2851 282.28223:3243 474.46808:9670 492.47845:36418	0	0	640038	290791	63857	101687	282130	601542	269502	59717	52805	149560	223375	99977	269085	77495	234578	84597	83703	197126	204580	296363	282092	367536
Gln-Asp	lvl 2A	9.417	260.088	MS & library MS/MS match	[M-H]-	HILIC-	Peptides and Ceramide Cluster	Amino acids, peptides, and analogues	SSHIXEILTLPAQT-WHFBIAKZSA-N	C(CC(=O)N)[C@@H](C(=O)N[C@@H](CC(=O)O)C(=O)O)N	260.08786:498813 261.09121:62521 262.09457:85739	56.96446:2010 69.70305:1980 71.01214:13522 88.03867:22585 88.32088:1918 102.05454:4823 106.11526:1841 111.01644:2317 113.03412:12303 113.07063:2272 114.01854:2862 115.00208:28273 127.04921:14719 128.03362:27291 131.04457:11061 132.02858:2797 137.90796:1959 144.07616:56791 145.06024:35228 146.04372:4693 199.07042:7652 216.09744:13959 242.07719:7570 243.06029:2541 259.64896:2077 260.08789:79002	58881	292756	2716464	928619	279692	251212	640871	1068588	1133328	1023526	683220	828893	622570	410884	716872	991726	981830	407106	185105	903050	918026	1217461	1325392	1494497
Glu-Asn	lvl 2A	9.609	260.088	MS & library MS/MS match	[M-H]-	HILIC-	Peptides and Ceramide Cluster	Amino acids, peptides, and analogues	TUTIHHSZKFBMHM-WHFBIAKZSA-N	C(CC(=O)O)[C@@H](C(=O)N[C@@H](CC(=O)N)C(=O)O)N	260.08786:681714 261.09121:104006 262.09457:7139	52.55805:1884 60.7642:1868 67.86134:2077 70.02794:17396 78.04913:1984 79.77415:1912 92.94241:2087 96.00743:19287 101.0704:26926 104.74261:1920 106.98824:2191 109.03902:3881 113.03431:16409 114.01808:58941 125.16265:2184 127.04974:68666 128.03394:4335 131.04469:76670 145.06027:126045 151.12737:2158 180.0748:2861 200.36969:3738 224.06664:4536 242.07703:42598 260.0878:44259	7077	90151	392332	281381	99892	127455	402151	218989	201698	156632	118170	139554	155424	98808	187224	126916	901864	228663	150107	257140	262123	347109	382091	381773
Glu-Gly-Glu	lvl 2A	9.416	332.109	MS & library MS/MS match	[M-H]-	HILIC-	Peptides and Ceramide Cluster	Amino acids, peptides, and analogues	OGNJZUXUTPQVBR-UHFFFAOYSA-N	C(CC(=O)O)C(C(=O)NCC(=O)NC(CCC(=O)O)C(=O)O)N	332.10892:216548 333.11227:27338 334.11563:52656	72.26715:2097 78.95181:2240 99.92435:2579 128.03371:36453 141.06593:4665 146.04478:10063 161.85049:2424 167.04457:2987 185.05571:22595 199.07169:3671 203.06667:8736 287.99332:4221 297.07288:3157 314.10043:8563 332.10956:15484	22981	58719	375455	128162	70003	68482	147862	143036	126139	108770	49178	48119	50033	40167	65162	92975	118768	12745	18285	56624	73395	109962	123804	135461
Glu-His	lvl 2A	9.894	283.104	MS & library MS/MS match	[M-H]-	HILIC-	Peptides and Ceramide Cluster	Amino acids, peptides, and analogues	HKTRDWYCAUTRRL-YUMQZZPRSA-N	C1=C(NC=N1)C[C@@H](C(=O)O)NC(=O)[C@H](CCC(=O)O)N	283.10382:257629 284.10717:27521 285.11053:2484	55.14302:2261 61.41486:1923 65.03158:2003 93.04432:4113 101.07107:2093 102.05502:2474 110.07111:11415 127.04972:16879 128.03395:14881 128.18668:2213 137.03421:2807 154.06079:79879 203.09265:4991 221.10439:13066 242.89053:2442 265.09256:27981 274.05478:2160 283.10464:15601	1549	6669	217536	37764	7553	7073	31275	35424	47931	25179	16230	38286	31547	7438	22044	13647	18375	6535	10796	32875	30806	46330	57066	58398
Gly-Asp	lvl 2A	9.352	189.05	MS & library MS/MS match	[M-H]-	HILIC-	Peptides and Ceramide Cluster	Amino acids, peptides, and analogues	SCCPDJAQCXWPTF-VKHMYHEASA-N	C([C@@H](C(=O)O)NC(=O)CN)C(=O)O	189.05029:1167909 190.05364:98669 191.057:551511	53.11363:1893 71.01241:11460 73.03909:164912 74.02312:124949 88.03877:91195 90.19964:1928 100.92442:2554 101.07061:13524 114.01841:4207 115.00201:50933 127.04956:6904 145.06015:100148 153.02921:12573 171.03931:18314 189.05023:81213	11903	42403	469219	328236	92302	205579	599036	319572	286516	213242	176891	252910	190170	103233	149394	223932	151933	110121	42808	405006	343828	408420	463653	480472
Gly-Glu	lvl 2A	9.241	203.066	MS & library MS/MS match	[M-H]-	HILIC-	Peptides and Ceramide Cluster	Amino acids, peptides, and analogues	IEFJWDNGDZAYNZ-BYPYZUCNSA-N	C(CC(=O)O)[C@@H](C(=O)O)NC(=O)CN	203.06601:4134740 204.06936:382871 205.07272:4101673	51.36459:1956 59.01228:3836 71.01223:2059 73.03914:64915 73.04368:2422 74.02312:296147 82.02808:3058 84.04386:4368 85.03913:2984 86.05952:2508 87.0548:25061 88.03885:28564 100.0387:8854 102.05435:96991 113.07051:4657 115.00211:12605 115.086:112732 122.82166:2238 123.05495:4224 128.03368:173357 141.06538:67604 146.04413:19902 159.07594:167679 179.5858:2097 185.05533:169089 197.17676:2366 201.58676…	25995	107572	1838431	857992	93184	142461	558025	867311	787153	685579	498020	728683	614380	407717	610089	679276	1217518	268118	242548	951547	859521	1113845	1140712	1261510
Gly-Gly	lvl 2A	9.126	131.045	MS & library MS/MS match	[M-H]-	HILIC-	Peptides and Ceramide Cluster	Amino acids, peptides, and analogues	YMAWOPBAYDPSLA-UHFFFAOYSA-N	C(C(=O)NCC(=O)O)N	131.0446:1270292 132.04795:94270 133.05131:56853	52.39202:1942 53.88108:1812 55.24321:1791 58.02816:3382 74.02323:31192 74.74409:1958 87.05463:21865 131.04466:9271	56596	90152	1053026	543107	112492	186781	469179	390534	347563	341993	265237	468527	418358	221821	305574	407685	83856	71099	75227	450468	298239	344170	348698	393079
Gly-Ser	lvl 2A	9.414	161.055	MS & library MS/MS match	[M-H]-	HILIC-	Peptides and Ceramide Cluster	Amino acids, peptides, and analogues	BCCRXDTUTZHDEU-VKHMYHEASA-N	C([C@@H](C(=O)O)NC(=O)CN)O	161.05525:2649848 162.0586:193423 163.06196:28553	50.67479:2056 50.94541:1884 58.02795:12910 59.01206:4740 60.99123:12222 65.37575:2346 67.61692:2321 71.01199:5306 72.04392:15620 73.02782:21189 73.03887:2479 74.02315:283593 83.02322:13032 85.02771:4240 85.03909:61740 87.05479:194559 97.03902:10556 99.05477:234381 99.18333:2177 104.0337:27494 113.034:42758 116.9266:3696 131.04457:634104 161.0554:168609	27984	91260	538562	456231	182866	246922	429185	350163	266488	274500	196763	590217	396290	155086	201128	276684	223441	341476	735734	1522434	662169	664569	713131	806981
His-Gly	lvl 2A	9.666	211.082	MS & library MS/MS match	[M-H]-	HILIC-	Peptides and Ceramide Cluster	Amino acids, peptides, and analogues	LYCVKHSJGDMDLM-LURJTMIESA-N	C1=C(NC=N1)C[C@@H](C(=O)NCC(=O)O)N	211.08238:869684 212.08573:0 213.08909:598526	55.59634:1911 67.02851:3365 68.65809:2254 74.02312:205634 75.41622:1989 80.03642:27672 81.03933:2866 81.04423:53977 85.03915:30712 87.05476:2117 93.04391:8079 108.05514:25085 109.03884:2696 113.03415:2659 136.0502:8861 149.08133:3285 150.06561:40808 167.07631:4612 167.09236:136796 193.07019:2915 200.0267:3922 211.03294:4075 211.08232:109443	3261	23303	512916	176851	9644	31818	114553	244402	200108	232558	137407	325683	258185	74293	99622	155350	97075	243252	138444	183610	244444	309900	335045	359597
Ile-Gln	lvl 2A	8.219	258.145	MS & library MS/MS match	[M-H]-	HILIC-	Peptides and Ceramide Cluster	Amino acids, peptides, and analogues	CNPNWGHRMBQHBZ-ZKWXMUAHSA-N	CC[C@H](C)[C@@H](C(=O)N[C@@H](CCC(=O)N)C(=O)O)N	258.14502:1056175 259.14837:195293 260.15173:6493	69.0035:2227 74.02296:2622 79.21256:2174 82.02827:5431 83.05984:5086 84.04395:2473 101.07031:4076 122.91364:2401 127.04972:151527 128.03416:24150 129.10175:126462 129.11261:3899 130.08533:9171 145.06024:66338 150.66644:2642 155.11751:9313 169.13329:3404 186.12413:3213 196.14427:293421 197.12848:3113 214.15501:58248 222.12381:33276 240.1342:236378 241.11832:4284 258.14505:540897	5034	129163	4109130	918202	123224	131117	401632	1056175	1115111	865367	615624	2574828	1562558	490427	731187	802430	1371315	504515	176690	623376	1025951	1530702	1466998	1729920
Leu-Gly-Leu	lvl 2A	7.161	300.192	MS & library MS/MS match	[M-H]-	HILIC-	Peptides and Ceramide Cluster	Amino acids, peptides, and analogues	HYIFFZAQXPUEAU-UHFFFAOYSA-N	CC(C)CC(C(=O)NCC(=O)NC(CC(C)C)C(=O)O)N	300.19174:749179 301.19509:114992 302.19845:10951	72.61176:2201 74.02305:14715 87.05479:5231 91.80036:2278 120.8323:2409 129.39395:2081 130.0858:108983 139.08603:2737 141.10097:3479 143.11659:2301 161.48849:2235 169.09647:14529 185.16422:15595 225.15915:2667 244.63251:2159 256.20203:42126 300.19186:109075	1205	8202	749179	48848	14489	10102	205880	62374	95137	62340	21511	76544	48158	36613	56529	94196	16554	30162	1857	28657	52718	77608	93198	102843
Leu-His	lvl 2A	8.833	267.145	MS & library MS/MS match	[M-H]-	HILIC-	Peptides and Ceramide Cluster	Amino acids, peptides, and analogues	XWOBNBRUDDUEEY-UWVGGRQHSA-N	CC(C)C[C@@H](C(=O)N[C@@H](CC1=CN=CN1)C(=O)O)N	267.14536:599433 268.14871:111373 269.15207:7616	50.00513:2186 55.09499:2060 67.02859:5222 81.04407:13144 93.04427:12739 110.07072:84102 117.66441:2171 129.10161:25337 130.08598:23880 137.03407:8327 154.0609:43560 156.91856:2100 169.09685:21955 178.13333:2794 198.65503:10774 205.14401:22851 223.15518:45992 230.30698:2285 249.13396:4034 267.14542:219221	0	10003	332654	179213	4015	12445	56895	133129	155012	237405	182524	280026	217702	79118	158649	207188	126575	147843	64389	164922	124065	153229	165213	196001
Leu-Val	lvl 2A	6.798	253.153	MS & library MS/MS match	[M+Na]+	HILIC+	Peptides and Ceramide Cluster	Amino acids, peptides, and analogues	MDSUKZSLOATHMH-UHFFFAOYSA-N	CC(C)CC(C(=O)NC(C(C)C)C(=O)O)N	253.15289:882772 254.15624:256142 255.1596:0	57.71244:2089 61.24577:2097 63.73932:1926 76.0955:1960 101.48581:2840 131.27119:2162 140.06862:29813 154.08411:34079 183.32596:1947 246.06096:2165 249.92839:2373 253.15306:288214	16261	64836	706706	384540	135049	156147	529494	464894	252013	189277	136626	228045	166114	195007	289651	244038	312795	222858	384719	498854	361999	460911	394385	395852
L-gamma-Glutamyl-L-glutamic acid	lvl 2A	9.345	275.088	MS & library MS/MS match	[M-H]-	HILIC-	Peptides and Ceramide Cluster	Amino acids, peptides, and analogues	OWQDWQKWSLFFFR-WDSKDSINSA-N	C(CC(=O)N[C@@H](CCC(=O)O)C(=O)O)[C@@H](C(=O)O)N	275.08774:1029754 276.09109:139704 277.09445:24213	54.34205:2046 69.43171:2463 80.29935:2056 82.02826:8496 84.0438:4885 101.07069:2515 102.05438:42988 107.53934:1851 109.07567:2513 127.0498:28493 128.03371:250503 145.05981:4620 146.04437:162080 169.09705:17597 195.07603:4982 213.08675:12659 231.09846:2450 232.38991:2186 239.06702:17778 257.07715:35779 268.65408:2381 275.08701:105917	21970	73016	802269	1437069	689776	546667	1361925	1265967	1318867	816973	379392	628374	456022	273949	604535	547844	5247780	420726	99206	550106	691368	958824	1071058	1078455
Ser-Ala	lvl 2A	8.949	175.071	MS & library MS/MS match	[M-H]-	HILIC-	Peptides and Ceramide Cluster	Amino acids, peptides, and analogues	SSJMZMUVNKEENT-IMJSIDKUSA-N	C[C@@H](C(=O)O)NC(=O)[C@H](CO)N	175.07095:4384412 176.0743:350757 177.07766:36409	55.13861:1916 56.82621:2085 72.04394:2524 73.03927:20190 74.02321:70874 87.05476:38456 88.0388:339621 101.0705:42017 107.05279:4528 112.32155:2504 131.04457:134352 145.06029:496291 146.95959:20671 157.06017:10790 175.071:90102	61577	323036	4384412	2354014	207099	707007	1384938	2187049	1983879	2423498	1558216	1808658	1593536	1211720	1791119	2507708	633437	736808	1291895	1955631	1558133	2170784	2136764	2409060
Ser-Glu	lvl 2A	9.395	235.093	MS & library MS/MS match	[M+H]+	HILIC+	Peptides and Ceramide Cluster	Amino acids, peptides, and analogues	LAFKUZYWNCHOHT-CRCLSJGQSA-N	C(CC(=O)O)[C@H](C(=O)O)NC(=O)[C@H](CO)N	235.09317:1209788 236.09652:129429 237.09988:83007	60.04474:299982 70.02905:17127 70.06541:2619 70.61842:1846 74.06011:8837 74.72712:2093 75.06351:2933 84.04453:28646 87.05512:2289 88.91679:2108 102.05517:37119 110.07175:8808 126.055:13485 130.05023:87116 133.06123:2376 133.70119:2229 134.06407:3912 144.06487:2752 148.06079:382707 154.05017:12507 162.10275:2405 170.04568:25647 171.07698:15781 189.08784:43644 190.90363:2094 199.07269:15052 200.054…	0	78212	1028620	721230	288155	148052	347189	563573	325063	477091	375368	1594693	998821	203913	381662	366859	1571521	423749	269520	428179	553070	570455	576626	532228
Ser-Gly	lvl 2A	9.296	161.055	MS & library MS/MS match	[M-H]-	HILIC-	Peptides and Ceramide Cluster	Amino acids, peptides, and analogues	WOUIMBGNEUWXQG-VKHMYHEASA-N	C([C@@H](C(=O)NCC(=O)O)N)O	161.05522:2519768 162.05857:186165 163.06193:54065	54.69577:2132 54.92431:2036 55.51235:2021 55.90301:1948 58.02828:20346 59.012:10767 71.01225:3872 73.02789:25297 74.02312:312540 83.0116:1873 85.02764:4102 85.03922:24809 87.00671:2572 87.05475:189083 89.02211:2096 92.30637:1905 99.05447:14886 105.72546:2047 124.209:2199 131.04456:802766 138.24335:2785 143.04507:15673 161.05533:123724	18312	114411	2686056	1308802	159877	316101	1085553	1011171	831947	964625	595295	1019443	852352	514327	597416	1139608	461212	505024	339294	1062914	940480	1056823	1090080	1082515
Ser-Gly-Ser	lvl 2A	9.667	248.088	MS & library MS/MS match	[M-H]-	HILIC-	Peptides and Ceramide Cluster	Amino acids, peptides, and analogues	UIGMAMGZOJVTDN-UHFFFAOYSA-N	C(C(C(=O)NCC(=O)NC(CO)C(=O)O)N)O	248.08784:900005 249.09119:74868 250.09455:10881	50.05539:2032 57.03881:1797 74.02315:41925 74.15746:2621 85.03918:8350 86.02287:4138 87.05464:25135 89.78168:2267 99.05464:16392 103.04945:4966 104.03382:23874 113.03388:18888 113.07014:2256 117.06518:4232 125.03497:2271 131.04478:11248 138.12518:3488 143.0448:26640 144.07639:82943 156.07635:107765 161.05505:30872 168.07695:2344 168.40408:2627 174.08694:23881 182.15378:1989 186.08713:10275 188.06…	1846	69910	1542581	306605	9604	38663	117687	266702	220019	370496	207403	189695	158145	103633	124081	284484	144406	183562	300669	314108	355987	442912	530165	543126
Thr-Ser	lvl 2A	9.25	205.082	MS & library MS/MS match	[M-H]-	HILIC-	Peptides and Ceramide Cluster	Amino acids, peptides, and analogues	GXDLGHLJTHMDII-WISUUJSJSA-N	C[C@H]([C@@H](C(=O)N[C@@H](CO)C(=O)O)N)O	205.08173:2325112 206.08508:178826 207.08844:14812	59.42907:2244 71.01231:3226 74.02319:83824 85.03921:10199 87.0548:45067 92.75874:2171 97.03916:36635 99.05495:20482 104.03363:41081 115.00239:1963 115.04988:2900 117.06522:8283 118.0496:22253 125.02261:2738 131.04462:483629 143.04454:13206 143.0808:4601 157.06006:10347 161.05534:159465 174.08681:2438 175.07101:54401 202.65787:3395 205.08179:118494	33413	173386	3733661	1639174	122313	381993	1090547	1578011	1697086	1718866	928834	1832369	935704	623250	1373014	1567711	1650661	998288	612086	2109092	1772601	2026281	2315466	2478340
Tyr-Ser	lvl 2A	8.547	267.098	MS & library MS/MS match	[M-H]-	HILIC-	Peptides and Ceramide Cluster	Amino acids, peptides, and analogues	ZSXJENBJGRHKIG-UWVGGRQHSA-N	C1=CC(=CC=C1C[C@@H](C(=O)N[C@@H](CO)C(=O)O)N)O	267.09769:488340 268.10104:82807 269.1044:15301	74.02303:24579 85.03918:18941 90.40253:2138 97.03942:5266 99.05501:9232 107.04887:29223 130.08623:3157 131.04434:17236 134.05977:5195 156.54103:2341 173.49611:2422 176.07014:2308 180.0656:8054 193.0977:8585 205.09676:16283 223.15701:2766 237.08707:143508 267.09799:74757 267.13177:2906 267.14633:5066	0	4352	157971	110732	8518	25032	140225	68671	125172	128486	80076	160989	138345	57161	123026	93803	116723	76588	45764	141314	65200	73321	82943	90995
[truncated: 354 more rows]

## Sheet: SuppTable5
Metabolite	Correlation to 4-Hydroxyhippuric acid
4-Hydroxyhippuric acid	1
Tauro-beta-muricholic acid	0.98
Taurolithocholic acid	0.97
Tauro-alpha-muricholic acid	0.95
ACar 12:0	0.93
Glycocholic acid	0.93
Glycoursodeoxycholic acid AND Glycodeoxycholic acid	0.93
Taurocholic acid	0.92
7.alpha.,17.alpha.-Dimethyl-5.beta.-androstane-3.alpha.,17.beta.-diol glucuronide	0.92
ACar 10:0	0.91
3,4-Dihydroxyphenylacetic acid	0.9
CAR 16:4	0.9
ACar 14:2	0.89
CAR 15:2	0.89
Taurolithocholic acid sulfate	0.89
CAR 16:3	0.88
[truncated: 4 more rows]
